# Supplementary material for: Generic and accurate prediction of retention times in liquid chromatography by post-projection calibration
Source: Research Square preprint supplement (doi:10.21203/rs.3.rs-3130052/v1), 2023-07-07
Supplement: Supplementary file 1 [file 1f13003de6958ea9ad1c50b2.xlsx]

## Sheet: Table S1
NIM Number/old	Compound Name	IUPAC Name	Formula	CAS Number	Pubchem Number	SMILES	InChI	Molecular Weight	LogKow estimated by EPISuit	ESI polarity	Ions	Superclass	Class	Subclass	nH	nC	nO	nF	nN	nS	nP	nCl	nBr	nI
1	4-Amino-1,2,4-triazole	1,2,4-triazol-4-amine	C2H4N4	584-13-4	11432	C1=NN=CN1N	InChI=1S/C2H4N4/c3-6-1-4-5-2-6/h1-2H,3H2	84.08	-1.68	Positive	M+H	Organoheterocyclic compounds	Azoles	Triazoles	4	2	0	0	4	0	0	0	0	0
2	Moniliformin	3-hydroxycyclobut-3-ene-1,2-dione	C4H2O3	31876-38-7	40452	C1=C(C(=O)C1=O)O	InChI=1S/C4H2O3/c5-2-1-3(6)4(2)7/h1,5H	98.0569	0.03	Negative	M-H	Organic acids and derivatives	Vinylogous acids	Not avaliable	2	4	3	0	0	0	0	0	0	0
3	3-Amino-2-oxazolidinone	3-amino-1,3-oxazolidin-2-one	C3H6N2O2	80-65-9	65725	C1COC(=O)N1N	InChI=1S/C3H6N2O2/c4-5-1-2-7-3(5)6/h1-2,4H2	102.092	-0.98	Positive	M+H	Organoheterocyclic compounds	Azolidines	Oxazolidines	6	3	2	0	2	0	0	0	0	0
4	1H-benzotriazole	2H-benzotriazole	C6H5N3	95-14-7	7220	C1=CC2=NNN=C2C=C1	InChI=1S/C6H5N3/c1-2-4-6-5(3-1)7-9-8-6/h1-4H,(H,7,8,9)	119.124	1.17	Positive	M+H	Organoheterocyclic compounds	Benzotriazoles	Not avaliable	5	6	0	0	3	0	0	0	0	0
5	Nicotinic Acid	pyridine-3-carboxylic acid	C6H5NO2	59-67-6	938	C1=CC(=CN=C1)C(=O)O	InChI=1S/C6H5NO2/c8-6(9)5-2-1-3-7-4-5/h1-4H,(H,8,9)	123.11	0.69	Positive	M+H	Organoheterocyclic compounds	Pyridines and derivatives	Pyridinecarboxylic acids and derivatives	5	6	2	0	1	0	0	0	0	0
6	Melamine	1,3,5-triazine-2,4,6-triamine	C3H6N6	108-78-1	7955	C1(=NC(=NC(=N1)N)N)N	InChI=1S/C3H6N6/c4-1-7-2(5)9-3(6)8-1/h(H6,4,5,6,7,8,9)	126.12	-1.37	Positive	M+H	Organoheterocyclic compounds	Triazines	1,3,5-triazines	6	3	0	0	6	0	0	0	0	0
7	Metformin	3-(diaminomethylidene)-1,1-dimethylguanidine	C4H11N5	657-24-9	4091	CN(C)C(=N)N=C(N)N	InChI=1S/C4H11N5/c1-9(2)4(7)8-3(5)6/h1-2H3,(H5,5,6,7,8)	129.164	-2.64	Positive	M+H	Organic nitrogen compounds	Organonitrogen compounds	Guanidines	11	4	0	0	5	0	0	0	0	0
8	1,3-Benzothiazol	1,3-benzothiazole	C7H5NS	95-16-9	7222	C1=CC=C2C(=C1)N=CS2	InChI=1S/C7H5NS/c1-2-4-7-6(3-1)8-5-9-7/h1-5H	135.186	2.17	Positive	M+H	Organoheterocyclic compounds	Benzothiazoles	Not avaliable	5	7	0	0	1	1	0	0	0	0
9	Trimethyl phosphate	trimethyl phosphate	C3H9O4P	512-56-1	10541	COP(=O)(OC)OC	InChI=1S/C3H9O4P/c1-5-8(4,6-2)7-3/h1-3H3	140.075	-0.65	Positive	M+H	Organic acids and derivatives	Organic phosphoric acids and derivatives	Phosphate esters	9	3	4	0	0	0	1	0	0	0
10	Hexamethylenetetramine	1,3,5,7-tetrazatricyclo[3.3.1.13,7]decane	C6H12N4	100-97-0	4101	C1N2CN3CN1CN(C2)C3	InChI=1S/C6H12N4/c1-7-2-9-4-8(1)5-10(3-7)6-9/h1-6H2	140.186	-4.15	Positive	M+H	Organoheterocyclic compounds	Triazinanes	1,3,5-triazinanes	12	6	0	0	4	0	0	0	0	0
11	(±)-Methamidophos	[amino(methylsulfanyl)phosphoryl]oxymethane	C2H8NO2PS	10265-92-6	4096	COP(=O)(N)SC	InChI=1S/C2H8NO2PS/c1-5-6(3,4)7-2/h1-2H3,(H2,3,4)	141.129	-0.93	Positive	M+H	Organophosphorus compounds	Organothiophosphorus compounds	Phosphoramidothioic-acid-O,S-diesters	8	2	2	0	1	1	1	0	0	0
12	Patulin	4-hydroxy-4,6-dihydrofuro[3,2-c]pyran-2-one	C7H6O4	149-29-1	4696	C1C=C2C(=CC(=O)O2)C(O1)O	InChI=1S/C7H6O4/c8-6-3-4-5(11-6)1-2-10-7(4)9/h1,3,7,9H,2H2	154.12	-2.4	Negative	M-H	Organoheterocyclic compounds	Pyrans	Not avaliable	6	7	4	0	0	0	0	0	0	0
13	L-carnitime	(3R)-3-hydroxy-4-(trimethylazaniumyl)butanoate	C7H15NO3	541-15-1	10917	C[N+](C)(C)C[C@@H](CC(=O)[O-])O	InChI=1S/C7H15NO3/c1-8(2,3)5-6(9)4-7(10)11/h6,9H,4-5H2,1-3H3/t6-/m1/s1	161.2	-3.48	Positive	M+H	Organic nitrogen compounds	Organonitrogen compounds	Quaternary ammonium salts	15	7	3	0	1	0	0	0	0	0
14	Recinine	4-methoxy-1-methyl-2-oxopyridine-3-carbonitrile	C8H8N2O2	524-40-3	10666	CN1C=CC(=C(C1=O)C#N)OC	InChI=1S/C8H8N2O2/c1-10-4-3-7(12-2)6(5-9)8(10)11/h3-4H,1-2H3	164.161	-0.45	Positive	M+H	Organoheterocyclic compounds	Pyridines and derivatives	3-pyridinecarbonitriles	8	8	2	0	2	0	0	0	0	0
15	Pyridoxine	4,5-bis(hydroxymethyl)-2-methylpyridin-3-ol	C8H11NO3	65-23-6	1054	CC1=NC=C(C(=C1O)CO)CO	InChI=1S/C8H11NO3/c1-5-8(12)7(4-11)6(3-10)2-9-5/h2,10-12H,3-4H2,1H3	169.18	-0.56	Positive	M+H	Organoheterocyclic compounds	Pyridines and derivatives	Pyridoxines	11	8	3	0	1	0	0	0	0	0
16	Pencillic acid	(2E)-3-methoxy-5-methyl-4-oxohexa-2,5-dienoic acid	C8H10O4	90-65-3	5385314	CC(=C)C(=O)/C(=C\C(=O)O)/OC	InChI=1S/C8H10O4/c1-5(2)8(11)6(12-3)4-7(9)10/h4H,1H2,2-3H3,(H,9,10)/b6-4+	170.163	1.3	Positive	M+H	Organic acids and derivatives	Keto acids and derivatives	Medium-chain keto acids and derivatives	10	8	4	0	0	0	0	0	0	0
17	Metronidazole	2-(2-methyl-5-nitroimidazol-1-yl)ethanol	C6H9N3O3	443-48-1	4173	CC1=NC=C(N1CCO)[N+](=O)[O-]	InChI=1S/C6H9N3O3/c1-5-7-4-6(9(11)12)8(5)2-3-10/h4,10H,2-3H2,1H3	171.154	-0.02	Positive	M+H	Organoheterocyclic compounds	Azoles	Imidazoles	9	6	3	0	3	0	0	0	0	0
18	Triethyl phosphate	triethyl phosphate	C6H15O4P	78-40-0	6535	CCOP(=O)(OCC)OCC	InChI=1S/C6H15O4P/c1-4-8-11(7,9-5-2)10-6-3/h4-6H2,1-3H3	182.155	0.87	Positive	M+H	Organic acids and derivatives	Organic phosphoric acids and derivatives	Phosphate esters	15	6	4	0	0	0	1	0	0	0
19	Acephate	N-[methoxy(methylsulfanyl)phosphoryl]acetamide	C4H10NO3PS	30560-19-1	1982	CC(=O)NP(=O)(OC)SC	InChI=1S/C4H10NO3PS/c1-4(6)5-9(7,8-2)10-3/h1-3H3,(H,5,6,7)	183.166	-0.9	Positive	M+H	Organophosphorus compounds	Organothiophosphorus compounds	Not avaliable	10	4	3	0	1	1	1	0	0	0
20	Sulfamylon	4-(aminomethyl)benzenesulfonamide	C7H10N2O2S	138-39-6	3998	C1=CC(=CC=C1CN)S(=O)(=O)N	InChI=1S/C7H10N2O2S/c8-5-6-1-3-7(4-2-6)12(9,10)11/h1-4H,5,8H2,(H2,9,10,11)	186.232	-0.55	Positive	M+H	Benzenoids	Benzene and substituted derivatives	Benzenesulfonamides	10	7	2	0	2	1	0	0	0	0
21	Molinate	S-ethyl azepane-1-carbothioate	C9H17NOS	2212-67-1	16653	CCSC(=O)N1CCCCCC1	InChI=1S/C9H17NOS/c1-2-12-9(11)10-7-5-3-4-6-8-10/h2-8H2,1H3	187.302	2.91	Positive	M+H	Organoheterocyclic compounds	Azepanes	Not avaliable	17	9	1	0	1	1	0	0	0	0
22	Atrazine-desethyl	6-chloro-2-N-propan-2-yl-1,3,5-triazine-2,4-diamine	C6H10ClN5	6190-65-4	22563	CC(C)NC1=NC(=NC(=N1)N)Cl	InChI=1S/C6H10ClN5/c1-3(2)9-6-11-4(7)10-5(8)12-6/h3H,1-2H3,(H3,8,9,10,11,12)	187.63	1.78	Positive	M+H	Organoheterocyclic compounds	Triazines	Aminotriazines	10	6	0	0	5	0	0	1	0	0
23	Isoprocarb	(2-propan-2-ylphenyl) N-methylcarbamate	C11H15NO2	2631-40-5	17517	CC(C)C1=CC=CC=C1OC(=O)NC	InChI=1S/C11H15NO2/c1-8(2)9-6-4-5-7-10(9)14-11(13)12-3/h4-8H,1-3H3,(H,12,13)	193.242	2.37	Positive	M+H	Benzenoids	Benzene and substituted derivatives	Cumenes	15	11	2	0	1	0	0	0	0	0
24	Bisphenol F	4-[(4-hydroxyphenyl)methyl]phenol	C13H12O2	620-92-8	12111	C1=CC(=CC=C1CC2=CC=C(C=C2)O)O	InChI=1S/C13H12O2/c14-12-5-1-10(2-6-12)9-11-3-7-13(15)8-4-11/h1-8,14-15H,9H2	200.23	3.06	Negative	M-H	Benzenoids	Benzene and substituted derivatives	Diphenylmethanes	12	13	2	0	0	0	0	0	0	0
25	3-Amino-5-morpholinomethyl-2-oxazolidinone	3-amino-5-(morpholin-4-ylmethyl)-1,3-oxazolidin-2-one	C8H15N3O3	43056-63-9	3016406	C1COCCN1CC2CN(C(=O)O2)N	InChI=1S/C8H15N3O3/c9-11-6-7(14-8(11)12)5-10-1-3-13-4-2-10/h7H,1-6,9H2	201.223	-1.74	Positive	M+H	Organoheterocyclic compounds	Azolidines	Oxazolidines	15	8	3	0	3	0	0	0	0	0
26	Thiabendazole	4-(1H-benzimidazol-2-yl)-1,3-thiazole	C10H7N3S	148-79-8	5430	C1=CC=C2C(=C1)NC(=N2)C3=CSC=N3	InChI=1S/C10H7N3S/c1-2-4-8-7(3-1)12-10(13-8)9-5-14-6-11-9/h1-6H,(H,12,13)	201.248	2	Positive	M+H	Organoheterocyclic compounds	Benzimidazoles	Not avaliable	7	10	0	0	3	1	0	0	0	0
27	4-Octylphenol	4-octylphenol	C14H22O	1806-26-4	15730	CCCCCCCCC1=CC=C(C=C1)O	InChI=1S/C14H22O/c1-2-3-4-5-6-7-8-13-9-11-14(15)12-10-13/h9-12,15H,2-8H2,1H3	206.32	5.5	Negative	M-H	Benzenoids	Phenols	1-hydroxy-2-unsubstituted benzenoids	22	14	1	0	0	0	0	0	0	0
28	(2E)-2-(2-Nitrobenzylidene)hydrazinecarboxamide	[(Z)-(2-nitrophenyl)methylideneamino]urea	C8H8N4O3	16004-43-6	5397522	C1=CC=C(C(=C1)/C=N/NC(=O)N)[N+](=O)[O-]	InChI=1S/C8H8N4O3/c9-8(13)11-10-5-6-3-1-2-4-7(6)12(14)15/h1-5H,(H3,9,11,13)/b10-5-	208.174	0.86	Positive	M+H	Benzenoids	Benzene and substituted derivatives	Nitrobenzenes	8	8	3	0	4	0	0	0	0	0
29	Propoxur	(2-propan-2-yloxyphenyl) N-methylcarbamate	C11H15NO3	114-26-1	4944	CC(C)OC1=CC=CC=C1OC(=O)NC	InChI=1S/C11H15NO3/c1-8(2)14-9-6-4-5-7-10(9)15-11(13)12-3/h4-8H,1-3H3,(H,12,13)	209.242	1.9	Positive	M+H	Benzenoids	Phenol ethers	Not avaliable	15	11	3	0	1	0	0	0	0	0
30	Ethirimol	5-butyl-2-(ethylamino)-4-methyl-1H-pyrimidin-6-one	C11H19N3O	23947-60-6	135424354	CCCCC1=C(N=C(NC1=O)NCC)C	InChI=1S/C11H19N3O/c1-4-6-7-9-8(3)13-11(12-5-2)14-10(9)15/h4-7H2,1-3H3,(H2,12,13,14,15)	209.288	3	Positive	M+H	Organoheterocyclic compounds	Diazines	Pyrimidines and pyrimidine derivatives	19	11	1	0	3	0	0	0	0	0
31	Perfluorobutanoic acid	2,2,3,3,4,4,4-heptafluorobutanoic acid	C4HF7O2	375-22-4	9777	C(=O)(C(C(C(F)(F)F)(F)F)(F)F)O	InChI=1S/C4HF7O2/c5-2(6,1(12)13)3(7,8)4(9,10)11/h(H,12,13)	214.038	2.43	Negative	M-H	Organohalogen compounds	Alkyl halides	Alkyl fluorides	1	4	2	7	0	0	0	0	0	0
32	Sulfacetamide	N-(4-aminophenyl)sulfonylacetamide	C8H10N2O3S	144-80-9	5320	CC(=O)NS(=O)(=O)C1=CC=C(C=C1)N	InChI=1S/C8H10N2O3S/c1-6(11)10-14(12,13)8-4-2-7(9)3-5-8/h2-5H,9H2,1H3,(H,10,11)	214.242	-0.6	Positive	M+H	Benzenoids	Benzene and substituted derivatives	Benzenesulfonamides	10	8	3	0	2	1	0	0	0	0
33	Sulfaguanidine	2-(4-aminophenyl)sulfonylguanidine	C7H10N4O2S	57-67-0	5324	C1=CC(=CC=C1N)S(=O)(=O)N=C(N)N	InChI=1S/C7H10N4O2S/c8-5-1-3-6(4-2-5)14(12,13)11-7(9)10/h1-4H,8H2,(H4,9,10,11)	214.245	-0.99	Positive	M+H	Benzenoids	Benzene and substituted derivatives	Benzenesulfonamides	10	7	2	0	4	1	0	0	0	0
34	Metribuzin	4-amino-6-tert-butyl-3-methylsulfanyl-1,2,4-triazin-5-one	C8H14N4OS	21087-64-9	30479	CC(C)(C)C1=NN=C(N(C1=O)N)SC	InChI=1S/C8H14N4OS/c1-8(2,3)5-6(13)12(9)7(14-4)11-10-5/h9H2,1-4H3	214.288	1.49	Positive	M+H	Organosulfur compounds	Thioethers	Aryl thioethers	14	8	1	0	4	1	0	0	0	0
35	Cycloate	S-ethyl N-cyclohexyl-N-ethylcarbamothioate	C11H21NOS	1134-23-2	14337	CCN(C1CCCCC1)C(=O)SCC	InChI=1S/C11H21NOS/c1-3-12(11(13)14-4-2)10-8-6-5-7-9-10/h10H,3-9H2,1-2H3	215.356	3.81	Positive	M+H	Organosulfur compounds	Thiocarbonyl compounds	Thiocarbamic acid derivatives	21	11	1	0	1	1	0	0	0	0
36	Mequindox	1-(3-methyl-4-oxido-1-oxoquinoxalin-1-ium-2-yl)ethanone	C11H10N2O3	13297-17-1	404291	CC1=C([N+](=O)C2=CC=CC=C2N1[O-])C(=O)C	InChI=1S/C11H10N2O3/c1-7-11(8(2)14)13(16)10-6-4-3-5-9(10)12(7)15/h3-6H,1-2H3	218.209	0.63	Positive	M+H	Organoheterocyclic compounds	Diazanaphthalenes	Benzodiazines	10	11	3	0	2	0	0	0	0	0
37	Pantothenic Acid	3-[[(2R)-2,4-dihydroxy-3,3-dimethylbutanoyl]amino]propanoic acid	C9H17NO5	79-83-4	6613	CC(C)(CO)[C@H](C(=O)NCCC(=O)O)O	InChI=1S/C9H17NO5/c1-9(2,5-11)7(14)8(15)10-4-3-6(12)13/h7,11,14H,3-5H2,1-2H3,(H,10,15)(H,12,13)/t7-/m0/s1	219.23	-1.69	Positive	M+H	Organic oxygen compounds	Organooxygen compounds	Alcohols and polyols	17	9	5	0	1	0	0	0	0	0
38	4-nonylphenol	4-nonylphenol	C15H24O	104-40-5	1752	CCCCCCCCCC1=CC=C(C=C1)O	InChI=1S/C15H24O/c1-2-3-4-5-6-7-8-9-14-10-12-15(16)13-11-14/h10-13,16H,2-9H2,1H3	220.35	5.99	Negative	M-H	Benzenoids	Phenols	1-hydroxy-2-unsubstituted benzenoids	24	15	1	0	0	0	0	0	0	0
39	Dichlorvos	2,2-dichloroethenyl dimethyl phosphate	C4H7Cl2O4P	62-73-7	3039	COP(=O)(OC)OC=C(Cl)Cl	InChI=1S/C4H7Cl2O4P/c1-8-11(7,9-2)10-3-4(5)6/h3H,1-2H3	220.976	0.6	Positive	M+H	Organic acids and derivatives	Organic phosphoric acids and derivatives	Phosphate esters	7	4	4	0	0	0	1	2	0	0
40	Monocrotophos	dimethyl [(E)-4-(methylamino)-4-oxobut-2-en-2-yl] phosphate	C7H14NO5P	6923-22-4	5371562	C/C(=C\C(=O)NC)/OP(=O)(OC)OC	InChI=1S/C7H14NO5P/c1-6(5-7(9)8-2)13-14(10,11-3)12-4/h5H,1-4H3,(H,8,9)/b6-5+	223.163	-0.31	Positive	M+H	Organic acids and derivatives	Organic phosphoric acids and derivatives	Phosphate esters	14	7	5	0	1	0	1	0	0	0
41	Mepanipyrim	4-methyl-N-phenyl-6-prop-1-ynylpyrimidin-2-amine	C14H13N3	110235-47-7	86296	CC#CC1=NC(=NC(=C1)C)NC2=CC=CC=C2	InChI=1S/C14H13N3/c1-3-7-13-10-11(2)15-14(17-13)16-12-8-5-4-6-9-12/h4-6,8-10H,1-2H3,(H,15,16,17)	223.273	3.46	Positive	M+H	Benzenoids	Benzene and substituted derivatives	Aniline and substituted anilines	13	14	0	0	3	0	0	0	0	0
42	Mevinphos	methyl (E)-3-dimethoxyphosphoryloxybut-2-enoate	C7H13O6P	7786-34-7	5355863	C/C(=C\C(=O)OC)/OP(=O)(OC)OC	InChI=1S/C7H13O6P/c1-6(5-7(8)10-2)13-14(9,11-3)12-4/h5H,1-4H3/b6-5+	224.148	0.76	Positive	M+H	Lipids and lipid-like molecules	Fatty Acyls	Fatty acid esters	13	7	6	0	0	0	1	0	0	0
43	Tripropyl phosphate	tripropyl phosphate	C9H21O4P	513-08-6	10546	CCCOP(=O)(OCCC)OCCC	InChI=1S/C9H21O4P/c1-4-7-11-14(10,12-8-5-2)13-9-6-3/h4-9H2,1-3H3	224.234	2.35	Positive	M+H	Organic acids and derivatives	Organic phosphoric acids and derivatives	Phosphate esters	21	9	4	0	0	0	1	0	0	0
44	Triisopropyl phosphate	tripropan-2-yl phosphate	C9H21O4P	513-02-0	68188	CC(C)OP(=O)(OC(C)C)OC(C)C	InChI=1S/C9H21O4P/c1-7(2)11-14(10,12-8(3)4)13-9(5)6/h7-9H,1-6H3	224.234	2.12	Positive	M+H	Organic acids and derivatives	Organic phosphoric acids and derivatives	Phosphate esters	21	9	4	0	0	0	1	0	0	0
45	Bisphenol A	4-[2-(4-hydroxyphenyl)propan-2-yl]phenol	C15H16O2	80-05-7	6623	CC(C)(C1=CC=C(C=C1)O)C2=CC=C(C=C2)O	InChI=1S/C15H16O2/c1-15(2,11-3-7-13(16)8-4-11)12-5-9-14(17)10-6-12/h3-10,16-17H,1-2H3	228.29	3.64	Negative	M-H	Benzenoids	Benzene and substituted derivatives	Diphenylmethanes	16	15	2	0	0	0	0	0	0	0
46	Dimethoate	2-dimethoxyphosphinothioylsulfanyl-N-methylacetamide	C5H12NO3PS2	60-51-5	3082	CNC(=O)CSP(=S)(OC)OC	InChI=1S/C5H12NO3PS2/c1-6-5(7)4-12-10(11,8-2)9-3/h4H2,1-3H3,(H,6,7)	229.257	0.72	Positive	M+H	Organic acids and derivatives	Organic dithiophosphoric acids and derivatives	Dithiophosphate O-esters	12	5	3	0	1	2	1	0	0	0
47	Propazine	6-chloro-2-N,4-N-di(propan-2-yl)-1,3,5-triazine-2,4-diamine	C9H16ClN5	139-40-2	4937	CC(C)NC1=NC(=NC(=N1)Cl)NC(C)C	InChI=1S/C9H16ClN5/c1-5(2)11-8-13-7(10)14-9(15-8)12-6(3)4/h5-6H,1-4H3,(H2,11,12,13,14,15)	229.71	3.24	Positive	M+H	Organoheterocyclic compounds	Triazines	Aminotriazines	16	9	0	0	5	0	0	1	0	0
48	PF4OPeA	2,2,3,3-tetrafluoro-3-(trifluoromethoxy)propanoic acid	C4HF7O3	377-73-1	120228	C(=O)(C(C(OC(F)(F)F)(F)F)(F)F)O	InChI=1S/C4HF7O3/c5-2(6,1(12)13)3(7,8)14-4(9,10)11/h(H,12,13)	230.04	2.28	Negative	M-H	Organic acids and derivatives	Carboxylic acids and derivatives	Alpha-halocarboxylic acids and derivatives	1	4	3	7	0	0	0	0	0	0
49	Nalidixic acid	1-ethyl-7-methyl-4-oxo-1,8-naphthyridine-3-carboxylic acid	C12H12N2O3	389-08-2	4421	CCN1C=C(C(=O)C2=C1N=C(C=C2)C)C(=O)O	InChI=1S/C12H12N2O3/c1-3-14-6-9(12(16)17)10(15)8-5-4-7(2)13-11(8)14/h4-6H,3H2,1-2H3,(H,16,17)	232.235	1.64	Positive	M+H	Organoheterocyclic compounds	Diazanaphthalenes	Naphthyridines	12	12	3	0	2	0	0	0	0	0
50	2-NP-AOZ	3-[(Z)-(2-nitrophenyl)methylideneamino]-1,3-oxazolidin-2-one	C10H9N3O4	19687-73-1	6445042	C1COC(=O)N1/N=C/C2=CC=CC=C2[N+](=O)[O-]	InChI=1S/C10H9N3O4/c14-10-12(5-6-17-10)11-7-8-3-1-2-4-9(8)13(15)16/h1-4,7H,5-6H2/b11-7-	235.196	1.65	Positive	M+H	Benzenoids	Benzene and substituted derivatives	Nitrobenzenes	9	10	4	0	3	0	0	0	0	0
51	Carbamazepine	benzo[b][1]benzazepine-11-carboxamide	C15H12N2O	298-46-4	2554	C1=CC=C2C(=C1)C=CC3=CC=CC=C3N2C(=O)N	InChI=1S/C15H12N2O/c16-15(18)17-13-7-3-1-5-11(13)9-10-12-6-2-4-8-14(12)17/h1-10H,(H2,16,18)	236.269	2.25	Positive	M+H	Organoheterocyclic compounds	Benzazepines	Dibenzazepines	12	15	1	0	2	0	0	0	0	0
52	Pirimicarb	[2-(dimethylamino)-5,6-dimethylpyrimidin-4-yl] N,N-dimethylcarbamate	C11H18N4O2	23103-98-2	31645	CC1=C(N=C(N=C1OC(=O)N(C)C)N(C)C)C	InChI=1S/C11H18N4O2/c1-7-8(2)12-10(14(3)4)13-9(7)17-11(16)15(5)6/h1-6H3	238.286	1.4	Positive	M+H	Organic nitrogen compounds	Organonitrogen compounds	Amines	18	11	2	0	4	0	0	0	0	0
53	Salbutamol	4-[2-(tert-butylamino)-1-hydroxyethyl]-2-(hydroxymethyl)phenol	C13H21NO3	18559-94-9	2083	CC(C)(C)NCC(C1=CC(=C(C=C1)O)CO)O	InChI=1S/C13H21NO3/c1-13(2,3)14-7-12(17)9-4-5-11(16)10(6-9)8-15/h4-6,12,14-17H,7-8H2,1-3H3	239.311	0.64	Positive	M+H	Benzenoids	Benzene and substituted derivatives	Benzyl alcohols	21	13	3	0	1	0	0	0	0	0
54	Methacrifos	methyl (E)-3-dimethoxyphosphinothioyloxy-2-methylprop-2-enoate	C7H13O5PS	62610-77-9	3034435	C/C(=C\OP(=S)(OC)OC)/C(=O)OC	InChI=1S/C7H13O5PS/c1-6(7(8)9-2)5-12-13(14,10-3)11-4/h5H,1-4H3/b6-5+	240.214	2.53	Positive	M+H	Organic acids and derivatives	Organic thiophosphoric acids and derivatives	Thiophosphoric acid esters	13	7	5	0	0	1	1	0	0	0
55	Bentazone	2,2-dioxo-3-propan-2-yl-1H-2lambda6,1,3-benzothiadiazin-4-one	C10H12N2O3S	25057-89-0	2328	CC(C)N1C(=O)C2=CC=CC=C2NS1(=O)=O	InChI=1S/C10H12N2O3S/c1-7(2)12-10(13)8-5-3-4-6-9(8)11-16(12,14)15/h3-7,11H,1-2H3	240.279	1.67	Negative	M-H	Benzenoids	Benzenoids	Not avaliable	12	10	3	0	2	1	0	0	0	0
56	Bisphenol B	4-[2-(4-hydroxyphenyl)butan-2-yl]phenol	C16H18O2	77-40-7	66166	CCC(C)(C1=CC=C(C=C1)O)C2=CC=C(C=C2)O	InChI=1S/C16H18O2/c1-3-16(2,12-4-8-14(17)9-5-12)13-6-10-15(18)11-7-13/h4-11,17-18H,3H2,1-2H3	242.31	4.13	Negative	M-H	Benzenoids	Benzene and substituted derivatives	Diphenylmethanes	18	16	2	0	0	0	0	0	0	0
57	Ethoprophos	1-[ethoxy(propylsulfanyl)phosphoryl]sulfanylpropane	C8H19O2PS2	13194-48-4	3289	CCCSP(=O)(OCC)SCCC	InChI=1S/C8H19O2PS2/c1-4-7-12-11(9,10-6-3)13-8-5-2/h4-8H2,1-3H3	242.339	3.14	Positive	M+H	Organophosphorus compounds	Organothiophosphorus compounds	Not avaliable	19	8	2	0	0	2	1	0	0	0
58	Biotin	5-[(3aS,4S,6aR)-2-oxo-1,3,3a,4,6,6a-hexahydrothieno[3,4-d]imidazol-4-yl]pentanoic acid	C10H16N2O3S	58-85-5	171548	C1[C@H]2[C@@H]([C@@H](S1)CCCCC(=O)O)NC(=O)N2	InChI=1S/C10H16N2O3S/c13-8(14)4-2-1-3-7-9-6(5-16-7)11-10(15)12-9/h6-7,9H,1-5H2,(H,13,14)(H2,11,12,15)/t6-,7-,9-/m0/s1	244.31	0.39	Positive	M+H	Organoheterocyclic compounds	Biotin and derivatives	Not avaliable	16	10	3	0	2	1	0	0	0	0
59	Fonofos	ethoxy-ethyl-phenylsulfanyl-sulfanylidene-lambda5-phosphane	C10H15OPS2	944-22-9	13676	CCOP(=S)(CC)SC1=CC=CC=C1	InChI=1S/C10H15OPS2/c1-3-11-12(13,4-2)14-10-8-6-5-7-9-10/h5-9H,3-4H2,1-2H3	246.329	4.02	Positive	M+H	Benzenoids	Benzene and substituted derivatives	Not avaliable	15	10	1	0	0	2	1	0	0	0
60	Paraoxon-methyl	dimethyl (4-nitrophenyl) phosphate	C8H10NO6P	950-35-6	13708	COP(=O)(OC)OC1=CC=C(C=C1)[N+](=O)[O-]	InChI=1S/C8H10NO6P/c1-13-16(12,14-2)15-8-5-3-7(4-6-8)9(10)11/h3-6H,1-2H3	247.142	0.98	Positive	M+H	Benzenoids	Benzene and substituted derivatives	Nitrobenzenes	10	8	6	0	1	0	1	0	0	0
61	2-NP-AHD	1-[(Z)-(2-nitrophenyl)methylideneamino]imidazolidine-2,4-dione	C10H8N4O4	623145-57-3	7018038	C1C(=O)NC(=O)N1/N=C/C2=CC=CC=C2[N+](=O)[O-]	InChI=1S/C10H8N4O4/c15-9-6-13(10(16)12-9)11-5-7-3-1-2-4-8(7)14(17)18/h1-5H,6H2,(H,12,15,16)/b11-5-	248.195	0.46	Positive	M+H	Organoheterocyclic compounds	Azolidines	Imidazolidines	8	10	4	0	4	0	0	0	0	0
62	Sulfapyridine	4-amino-N-pyridin-2-ylbenzenesulfonamide	C11H11N3O2S	144-83-2	5336	C1=CC=NC(=C1)NS(=O)(=O)C2=CC=C(C=C2)N	InChI=1S/C11H11N3O2S/c12-9-4-6-10(7-5-9)17(15,16)14-11-3-1-2-8-13-11/h1-8H,12H2,(H,13,14)	249.289	0.53	Positive	M+H	Benzenoids	Benzene and substituted derivatives	Benzenesulfonamides	11	11	2	0	3	1	0	0	0	0
63	PFPrS	1,1,2,2,3,3,3-heptafluoropropane-1-sulfonic acid	C3HF7O3S	423-41-6	9859771	C(C(F)(F)F)(C(F)(F)S(=O)(=O)O)(F)F	InChI=1S/C3HF7O3S/c4-1(5,2(6,7)8)3(9,10)14(11,12)13/h(H,11,12,13)	250.09	1.15	Negative	M-H	Organohalogen compounds	Alkyl halides	Alkyl fluorides	1	3	3	7	0	1	0	0	0	0
64	(-)-Citrinin	(3R,4S)-6-hydroxy-3,4,5-trimethyl-8-oxo-3,4-dihydroisochromene-7-carboxylic acid	C13H14O5	518-75-2	54680783	C[C@@H]1[C@H](OC=C2C1=C(C(=C(C2=O)C(=O)O)O)C)C	InChI=1S/C13H14O5/c1-5-7(3)18-4-8-9(5)6(2)11(14)10(12(8)15)13(16)17/h4-5,7,14H,1-3H3,(H,16,17)/t5-,7-/m1/s1	250.25	0.45	Positive	M+H	Organoheterocyclic compounds	Benzopyrans	Not avaliable	14	13	5	0	0	0	0	0	0	0
65	Bisphenol S	4-(4-hydroxyphenyl)sulfonylphenol	C12H10O4S	80-09-1	6626	C1=CC(=CC=C1O)S(=O)(=O)C2=CC=C(C=C2)O	InChI=1S/C12H10O4S/c13-9-1-5-11(6-2-9)17(15,16)12-7-3-10(14)4-8-12/h1-8,13-14H	250.27	1.65	Negative	M-H	Benzenoids	Benzene and substituted derivatives	Benzenesulfonyl compounds	10	12	4	0	0	1	0	0	0	0
66	Sulfadiazine	4-amino-N-pyrimidin-2-ylbenzenesulfonamide	C10H10N4O2S	68-35-9	5215	C1=CN=C(N=C1)NS(=O)(=O)C2=CC=C(C=C2)N	InChI=1S/C10H10N4O2S/c11-8-2-4-9(5-3-8)17(15,16)14-10-12-6-1-7-13-10/h1-7H,11H2,(H,12,13,14)	250.277	-0.34	Positive	M+H	Benzenoids	Benzene and substituted derivatives	Benzenesulfonamides	10	10	2	0	4	1	0	0	0	0
67	Hexazinone	3-cyclohexyl-6-(dimethylamino)-1-methyl-1,3,5-triazine-2,4-dione	C12H20N4O2	51235-04-2	39965	CN1C(=NC(=O)N(C1=O)C2CCCCC2)N(C)C	InChI=1S/C12H20N4O2/c1-14(2)10-13-11(17)16(12(18)15(10)3)9-7-5-4-6-8-9/h9H,4-8H2,1-3H3	252.313	2.15	Positive	M+H	Organic nitrogen compounds	Organonitrogen compounds	Amines	20	12	2	0	4	0	0	0	0	0
68	Sulfamethoxazole	4-amino-N-(5-methyl-1,2-oxazol-3-yl)benzenesulfonamide	C10H11N3O3S	723-46-6	5329	CC1=CC(=NO1)NS(=O)(=O)C2=CC=C(C=C2)N	InChI=1S/C10H11N3O3S/c1-7-6-10(12-16-7)13-17(14,15)9-4-2-8(11)3-5-9/h2-6H,11H2,1H3,(H,12,13)	253.278	0.48	Positive	M+H	Benzenoids	Benzene and substituted derivatives	Benzenesulfonamides	11	10	3	0	3	1	0	0	0	0
69	Fenothiocarb	S-(4-phenoxybutyl) N,N-dimethylcarbamothioate	C13H19NO2S	62850-32-2	44178	CN(C)C(=O)SCCCCOC1=CC=CC=C1	InChI=1S/C13H19NO2S/c1-14(2)13(15)17-11-7-6-10-16-12-8-4-3-5-9-12/h3-5,8-9H,6-7,10-11H2,1-2H3	253.361	3.28	Positive	M+H	Benzenoids	Phenol ethers	Not avaliable	19	13	2	0	1	1	0	0	0	0
70	Sulfathiazole	4-amino-N-(1,3-thiazol-2-yl)benzenesulfonamide	C9H9N3O2S2	72-14-0	5340	C1=CC(=CC=C1N)S(=O)(=O)NC2=NC=CS2	InChI=1S/C9H9N3O2S2/c10-7-1-3-8(4-2-7)16(13,14)12-9-11-5-6-15-9/h1-6H,10H2,(H,11,12)	255.317	0.72	Positive	M+H	Benzenoids	Benzene and substituted derivatives	Benzenesulfonamides	9	9	2	0	3	2	0	0	0	0
71	Formothion	2-dimethoxyphosphinothioylsulfanyl-N-formyl-N-methylacetamide	C6H12NO4PS2	2540-82-1	17345	CN(C=O)C(=O)CSP(=S)(OC)OC	InChI=1S/C6H12NO4PS2/c1-7(5-8)6(9)4-14-12(13,10-2)11-3/h5H,4H2,1-3H3	257.267	1.26	Positive	M+H	Organic acids and derivatives	Carboxylic acids and derivatives	Carboxylic acid derivatives	12	6	4	0	1	2	1	0	0	0
72	Thiobencarb	S-[(4-chlorophenyl)methyl] N,N-diethylcarbamothioate	C12H16ClNOS	28249-77-6	34192	CCN(CC)C(=O)SCC1=CC=C(C=C1)Cl	InChI=1S/C12H16ClNOS/c1-3-14(4-2)12(15)16-9-10-5-7-11(13)8-6-10/h5-8H,3-4,9H2,1-2H3	257.779	3.41	Positive	M+H	Benzenoids	Benzene and substituted derivatives	Halobenzenes	16	12	1	0	1	1	0	1	0	0
73	Alternariol	3,7,9-trihydroxy-1-methylbenzo[c]chromen-6-one	C14H10O5	641-38-3	5359485	CC1=CC(=CC2=C1C3=C(C(=CC(=C3)O)O)C(=O)O2)O	InChI=1S/C14H10O5/c1-6-2-7(15)5-11-12(6)9-3-8(16)4-10(17)13(9)14(18)19-11/h2-5,15-17H,1H3	258.226	2.35	Negative	M-H	Phenylpropanoids and polyketides	Coumarins and derivatives	Not avaliable	10	14	5	0	0	0	0	0	0	0
74	Metobromuron	3-(4-bromophenyl)-1-methoxy-1-methylurea	C9H11BrN2O2	3060-89-7	18290	CN(C(=O)NC1=CC=C(C=C1)Br)OC	InChI=1S/C9H11BrN2O2/c1-12(14-2)9(13)11-8-5-3-7(10)4-6-8/h3-6H,1-2H3,(H,11,13)	259.1	2.51	Positive	M+H	Benzenoids	Benzene and substituted derivatives	N-phenylureas	11	9	2	0	2	0	0	0	1	0
75	Bromacil	5-bromo-3-butan-2-yl-6-methyl-1H-pyrimidine-2,4-dione	C9H13BrN2O2	314-40-9	9411	CCC(C)N1C(=O)C(=C(NC1=O)C)Br	InChI=1S/C9H13BrN2O2/c1-4-5(2)12-8(13)7(10)6(3)11-9(12)14/h5H,4H2,1-3H3,(H,11,14)	261.116	1.68	Positive	M+H	Organoheterocyclic compounds	Diazines	Pyrimidines and pyrimidine derivatives	13	9	2	0	2	0	0	0	1	0
76	Oxolinic acid	5-ethyl-8-oxo-[1,3]dioxolo[4,5-g]quinoline-7-carboxylic acid	C13H11NO5	14698-29-4	4628	CCN1C=C(C(=O)C2=CC3=C(C=C21)OCO3)C(=O)O	InChI=1S/C13H11NO5/c1-2-14-5-8(13(16)17)12(15)7-3-10-11(4-9(7)14)19-6-18-10/h3-5H,2,6H2,1H3,(H,16,17)	261.23	1.7	Positive	M+H	Organoheterocyclic compounds	Quinolines and derivatives	Quinoline carboxylic acids	11	13	5	0	1	0	0	0	0	0
77	Flumequine	7-fluoro-12-methyl-4-oxo-1-azatricyclo[7.3.1.05,13]trideca-2,5,7,9(13)-tetraene-3-carboxylic acid	C14H12FNO3	42835-25-6	3374	CC1CCC2=C3N1C=C(C(=O)C3=CC(=C2)F)C(=O)O	InChI=1S/C14H12FNO3/c1-7-2-3-8-4-9(15)5-10-12(8)16(7)6-11(13(10)17)14(18)19/h4-7H,2-3H2,1H3,(H,18,19)	261.248	2.7	Positive	M+H	Organoheterocyclic compounds	Quinolines and derivatives	Quinoline carboxylic acids	12	14	3	1	1	0	0	0	0	0
78	Cinoxacin	1-ethyl-4-oxo-[1,3]dioxolo[4,5-g]cinnoline-3-carboxylic acid	C12H10N2O5	28657-80-9	2762	CCN1C2=CC3=C(C=C2C(=O)C(=N1)C(=O)O)OCO3	InChI=1S/C12H10N2O5/c1-2-14-7-4-9-8(18-5-19-9)3-6(7)11(15)10(13-14)12(16)17/h3-4H,2,5H2,1H3,(H,16,17)	262.218	1.59	Positive	M+H	Organoheterocyclic compounds	Diazanaphthalenes	Benzodiazines	10	12	5	0	2	0	0	0	0	0
79	Carbadox	methyl N-[(Z)-(1,4-dioxidoquinoxaline-1,4-diium-2-yl)methylideneamino]carbamate	C11H10N4O4	6804-07-5	136662877	COC(=O)N/N=C/C1=[N+](C2=CC=CC=C2[N+](=C1)[O-])[O-]	InChI=1S/C11H10N4O4/c1-19-11(16)13-12-6-8-7-14(17)9-4-2-3-5-10(9)15(8)18/h2-7H,1H3,(H,13,16)/b12-6-	262.221	-1.37	Positive	M+H	Organoheterocyclic compounds	Diazanaphthalenes	Benzodiazines	10	11	4	0	4	0	0	0	0	0
80	Perfluoropentanoic acid	2,2,3,3,4,4,5,5,5-nonafluoropentanoic acid	C5HF9O2	2706-90-3	75921	C(=O)(C(C(C(C(F)(F)F)(F)F)(F)F)(F)F)O	InChI=1S/C5HF9O2/c6-2(7,1(15)16)3(8,9)4(10,11)5(12,13)14/h(H,15,16)	264.046	2.81	Negative	M-H	Organohalogen compounds	Alkyl halides	Alkyl fluorides	1	5	2	9	0	0	0	0	0	0
81	Sulfamerazine	4-amino-N-(4-methylpyrimidin-2-yl)benzenesulfonamide	C11H12N4O2S	127-79-7	5325	CC1=NC(=NC=C1)NS(=O)(=O)C2=CC=C(C=C2)N	InChI=1S/C11H12N4O2S/c1-8-6-7-13-11(14-8)15-18(16,17)10-4-2-9(12)3-5-10/h2-7H,12H2,1H3,(H,13,14,15)	264.304	0.21	Positive	M+H	Benzenoids	Benzene and substituted derivatives	Benzenesulfonamides	12	11	2	0	4	1	0	0	0	0
82	Aclonifen	2-chloro-6-nitro-3-phenoxyaniline	C12H9ClN2O3	74070-46-5	92389	C1=CC=C(C=C1)OC2=C(C(=C(C=C2)[N+](=O)[O-])N)Cl	InChI=1S/C12H9ClN2O3/c13-11-10(18-8-4-2-1-3-5-8)7-6-9(12(11)14)15(16)17/h1-7H,14H2	264.66	3.88	Positive	M+H	Benzenoids	Benzene and substituted derivatives	Diphenylethers	9	12	3	0	2	0	0	1	0	0
83	Dienestrol	4-[(2E,4E)-4-(4-hydroxyphenyl)hexa-2,4-dien-3-yl]phenol	C18H18O2	84-17-3	667476	C/C=C(/C(=C/C)/C1=CC=C(C=C1)O)\C2=CC=C(C=C2)O	InChI=1S/C18H18O2/c1-3-17(13-5-9-15(19)10-6-13)18(4-2)14-7-11-16(20)12-8-14/h3-12,19-20H,1-2H3/b17-3+,18-4+	266.3	5.43	Negative	M-H	Phenylpropanoids and polyketides	Stilbenes	Not avaliable	18	18	2	0	0	0	0	0	0	0
84	Tributyl phosphate	tributyl phosphate	C12H27O4P	126-73-8	31357	CCCCOP(=O)(OCCCC)OCCCC	InChI=1S/C12H27O4P/c1-4-7-10-14-17(13,15-11-8-5-2)16-12-9-6-3/h4-12H2,1-3H3	266.314	3.82	Positive	M+H	Organic acids and derivatives	Organic phosphoric acids and derivatives	Phosphate esters	27	12	4	0	0	0	1	0	0	0
85	Triisobutyl phosphate	tris(2-methylpropyl) phosphate	C12H27O4P	126-71-6	31355	CC(C)COP(=O)(OCC(C)C)OCC(C)C	InChI=1S/C12H27O4P/c1-10(2)7-14-17(13,15-8-11(3)4)16-9-12(5)6/h10-12H,7-9H2,1-6H3	266.314	3.6	Positive	M+H	Organic acids and derivatives	Organic phosphoric acids and derivatives	Phosphate esters	27	12	4	0	0	0	1	0	0	0
86	Sulfisoxazole	4-amino-N-(3,4-dimethyl-1,2-oxazol-5-yl)benzenesulfonamide	C11H13N3O3S	127-69-5	5344	CC1=C(ON=C1C)NS(=O)(=O)C2=CC=C(C=C2)N	InChI=1S/C11H13N3O3S/c1-7-8(2)13-17-11(7)14-18(15,16)10-5-3-9(12)4-6-10/h3-6,14H,12H2,1-2H3	267.304	1.03	Positive	M+H	Benzenoids	Benzene and substituted derivatives	Benzenesulfonamides	13	11	3	0	3	1	0	0	0	0
87	Diethylstilbestrol	4-[(E)-4-(4-hydroxyphenyl)hex-3-en-3-yl]phenol	C18H20O2	56-53-1	448537	CC/C(=C(/CC)\C1=CC=C(C=C1)O)/C2=CC=C(C=C2)O	InChI=1S/C18H20O2/c1-3-17(13-5-9-15(19)10-6-13)18(4-2)14-7-11-16(20)12-8-14/h5-12,19-20H,3-4H2,1-2H3/b18-17+	268.3	5.64	Negative	M-H	Phenylpropanoids and polyketides	Stilbenes	Not avaliable	20	18	2	0	0	0	0	0	0	0
88	Mephosfolan	N-diethoxyphosphoryl-4-methyl-1,3-dithiolan-2-imine	C8H16NO3PS2	950-10-7	13707	CCOP(=O)(N=C1SCC(S1)C)OCC	InChI=1S/C8H16NO3PS2/c1-4-11-13(10,12-5-2)9-8-14-6-7(3)15-8/h7H,4-6H2,1-3H3	269.321	1.58	Positive	M+H	Organic acids and derivatives	Organic phosphoric acids and derivatives	Phosphate esters	16	8	3	0	1	2	1	0	0	0
89	Acetochlor	2-chloro-N-(ethoxymethyl)-N-(2-ethyl-6-methylphenyl)acetamide	C14H20ClNO2	34256-82-1	1988	CCC1=CC=CC(=C1N(COCC)C(=O)CCl)C	InChI=1S/C14H20ClNO2/c1-4-12-8-6-7-11(3)14(12)16(10-18-5-2)13(17)9-15/h6-8H,4-5,9-10H2,1-3H3	269.767	3.37	Positive	M+H	Benzenoids	Benzene and substituted derivatives	Anilides	20	14	2	0	1	0	0	1	0	0
90	Sulfamethizol	4-amino-N-(5-methyl-1,3,4-thiadiazol-2-yl)benzenesulfonamide	C9H10N4O2S2	144-82-1	5328	CC1=NN=C(S1)NS(=O)(=O)C2=CC=C(C=C2)N	InChI=1S/C9H10N4O2S2/c1-6-11-12-9(16-6)13-17(14,15)8-4-2-7(10)3-5-8/h2-5H,10H2,1H3,(H,12,13)	270.331	0.41	Positive	M+H	Benzenoids	Benzene and substituted derivatives	Benzenesulfonamides	10	9	2	0	4	2	0	0	0	0
91	Hexestrol	4-[(3S,4R)-4-(4-hydroxyphenyl)hexan-3-yl]phenol	C18H22O2	84-16-2	192197	CC[C@H](C1=CC=C(C=C1)O)[C@@H](CC)C2=CC=C(C=C2)O	InChI=1S/C18H22O2/c1-3-17(13-5-9-15(19)10-6-13)18(4-2)14-7-11-16(20)12-8-14/h5-12,17-20H,3-4H2,1-2H3/t17-,18+	270.4	5.6	Negative	M-H	Phenylpropanoids and polyketides	Stilbenes	Not avaliable	22	18	2	0	0	0	0	0	0	0
92	Paraoxon	diethyl (4-nitrophenyl) phosphate	C10H14NO6P	311-45-5	9395	CCOP(=O)(OCC)OC1=CC=C(C=C1)[N+](=O)[O-]	InChI=1S/C10H14NO6P/c1-3-15-18(14,16-4-2)17-10-7-5-9(6-8-10)11(12)13/h5-8H,3-4H2,1-2H3	275.195	1.97	Positive	M+H	Benzenoids	Benzene and substituted derivatives	Nitrobenzenes	14	10	6	0	1	0	1	0	0	0
93	Nifuroxazide	4-hydroxy-N-[(Z)-(5-nitrofuran-2-yl)methylideneamino]benzamide	C12H9N3O5	965-52-6	5390108	C1=CC(=CC=C1C(=O)N/N=C/C2=CC=C(O2)[N+](=O)[O-])O	InChI=1S/C12H9N3O5/c16-9-3-1-8(2-4-9)12(17)14-13-7-10-5-6-11(20-10)15(18)19/h1-7,16H,(H,14,17)/b13-7-	275.217	1.49	Positive	M+H	Benzenoids	Benzene and substituted derivatives	Benzoic acids and derivatives	9	12	5	0	3	0	0	0	0	0
94	Sudan II	1-[(2,4-dimethylphenyl)diazenyl]naphthalen-2-ol	C18H16N2O	3118-97-6	18386	CC1=CC(=C(C=C1)N=NC2=C(C=CC3=CC=CC=C32)O)C	InChI=1S/C18H16N2O/c1-12-7-9-16(13(2)11-12)19-20-18-15-6-4-3-5-14(15)8-10-17(18)21/h3-11,21H,1-2H3	276.332	6.6	Positive	M+H	Benzenoids	Naphthalenes	Naphthols and derivatives	16	18	1	0	2	0	0	0	0	0
95	Phorate sulfoxide	diethoxy-(ethylsulfinylmethylsulfanyl)-sulfanylidene-lambda5-phosphane	C7H17O3PS3	2588-03-6	17424	CCOP(=S)(OCC)SCS(=O)CC	InChI=1S/C7H17O3PS3/c1-4-9-11(12,10-5-2)13-7-14(8)6-3/h4-7H2,1-3H3	276.377	1.83	Positive	M+H	Organic acids and derivatives	Organic dithiophosphoric acids and derivatives	Dithiophosphate O-esters	17	7	3	0	0	3	1	0	0	0
96	Clenbuterol	1-(4-amino-3,5-dichlorophenyl)-2-(tert-butylamino)ethanol	C12H18Cl2N2O	37148-27-9	2783	CC(C)(C)NCC(C1=CC(=C(C(=C1)Cl)N)Cl)O	InChI=1S/C12H18Cl2N2O/c1-12(2,3)16-6-10(17)7-4-8(13)11(15)9(14)5-7/h4-5,10,16-17H,6,15H2,1-3H3	277.19	2	Positive	M+H	Benzenoids	Benzene and substituted derivatives	Halobenzenes	18	12	1	0	2	0	0	2	0	0
97	Fenthion	dimethoxy-(3-methyl-4-methylsulfanylphenoxy)-sulfanylidene-lambda5-phosphane	C10H15O3PS2	55-38-9	3346	CC1=C(C=CC(=C1)OP(=S)(OC)OC)SC	InChI=1S/C10H15O3PS2/c1-8-7-9(5-6-10(8)16-4)13-14(15,11-2)12-3/h5-7H,1-4H3	278.328	4.08	Positive	M+H	Organic acids and derivatives	Organic thiophosphoric acids and derivatives	Thiophosphoric acid esters	15	10	3	0	0	2	1	0	0	0
98	Sulfisomidin	4-amino-N-(2,6-dimethylpyrimidin-4-yl)benzenesulfonamide	C12H14N4O2S	515-64-0	5343	CC1=CC(=NC(=N1)C)NS(=O)(=O)C2=CC=C(C=C2)N	InChI=1S/C12H14N4O2S/c1-8-7-12(15-9(2)14-8)16-19(17,18)11-5-3-10(13)4-6-11/h3-7H,13H2,1-2H3,(H,14,15,16)	278.33	0.76	Positive	M+H	Benzenoids	Benzene and substituted derivatives	Benzenesulfonamides	14	12	2	0	4	1	0	0	0	0
99	Metalaxyl	methyl 2-(N-(2-methoxyacetyl)-2,6-dimethylanilino)propanoate	C15H21NO4	57837-19-1	42586	CC1=C(C(=CC=C1)C)N(C(C)C(=O)OC)C(=O)COC	InChI=1S/C15H21NO4/c1-10-7-6-8-11(2)14(10)16(13(17)9-19-4)12(3)15(18)20-5/h6-8,12H,9H2,1-5H3	279.332	1.7	Positive	M+H	Organic acids and derivatives	Carboxylic acids and derivatives	Amino acids, peptides, and analogues	21	15	4	0	1	0	0	0	0	0
100	PF5OHxA	2,2,3,3,4,4-hexafluoro-4-(trifluoromethoxy)butanoic acid	C5HF9O3	863090-89-5	12498036	C(=O)(C(C(C(OC(F)(F)F)(F)F)(F)F)(F)F)O	InChI=1S/C5HF9O3/c6-2(7,1(15)16)3(8,9)4(10,11)17-5(12,13)14/h(H,15,16)	280.04	2.95	Negative	M-H	Lipids and lipid-like molecules	Fatty Acyls	Fatty acids and conjugates	1	5	3	9	0	0	0	0	0	0
101	Sulfamethoxydiazine	4-amino-N-(5-methoxypyrimidin-2-yl)benzenesulfonamide	C11H12N4O3S	651-06-9	5326	COC1=CN=C(N=C1)NS(=O)(=O)C2=CC=C(C=C2)N	InChI=1S/C11H12N4O3S/c1-18-9-6-13-11(14-7-9)15-19(16,17)10-4-2-8(12)3-5-10/h2-7H,12H2,1H3,(H,13,14,15)	280.303	-0.26	Positive	M+H	Benzenoids	Benzene and substituted derivatives	Benzenesulfonamides	12	11	3	0	4	1	0	0	0	0
102	Sulfamonomethoxine	4-amino-N-(6-methoxypyrimidin-4-yl)benzenesulfonamide	C11H12N4O3S	1220-83-3	5332	COC1=NC=NC(=C1)NS(=O)(=O)C2=CC=C(C=C2)N	InChI=1S/C11H12N4O3S/c1-18-11-6-10(13-7-14-11)15-19(16,17)9-4-2-8(12)3-5-9/h2-7H,12H2,1H3,(H,13,14,15)	280.303	0.2	Positive	M+H	Benzenoids	Benzene and substituted derivatives	Benzenesulfonamides	12	11	3	0	4	1	0	0	0	0
103	Sulfamethoxypyridazine	4-amino-N-(6-methoxypyridazin-3-yl)benzenesulfonamide	C11H12N4O3S	80-35-3	5330	COC1=NN=C(C=C1)NS(=O)(=O)C2=CC=C(C=C2)N	InChI=1S/C11H12N4O3S/c1-18-11-7-6-10(13-14-11)15-19(16,17)9-4-2-8(12)3-5-9/h2-7H,12H2,1H3,(H,13,15)	280.303	0.2	Positive	M+H	Benzenoids	Benzene and substituted derivatives	Benzenesulfonamides	12	11	3	0	4	1	0	0	0	0
104	Propetamphos	propan-2-yl (E)-3-[ethylamino(methoxy)phosphinothioyl]oxybut-2-enoate	C10H20NO4PS	31218-83-4	5372405	CCNP(=S)(OC)O/C(=C/C(=O)OC(C)C)/C	InChI=1S/C10H20NO4PS/c1-6-11-16(17,13-5)15-9(4)7-10(12)14-8(2)3/h7-8H,6H2,1-5H3,(H,11,17)/b9-7+	281.309	3.51	Positive	M+H	Lipids and lipid-like molecules	Fatty Acyls	Fatty acid esters	20	10	4	0	1	1	1	0	0	0
105	Brevianamide F	(3S,8aS)-3-(1H-indol-3-ylmethyl)-2,3,6,7,8,8a-hexahydropyrrolo[1,2-a]pyrazine-1,4-dione	C16H17N3O2	38136-70-8	181567	C1C[C@H]2C(=O)N[C@H](C(=O)N2C1)CC3=CNC4=CC=CC=C43	InChI=1S/C16H17N3O2/c20-15-14-6-3-7-19(14)16(21)13(18-15)8-10-9-17-12-5-2-1-4-11(10)12/h1-2,4-5,9,13-14,17H,3,6-8H2,(H,18,20)/t13-,14-/m0/s1	283.325	0.37	Positive	M+H	Organic acids and derivatives	Carboxylic acids and derivatives	Amino acids, peptides, and analogues	17	16	2	0	3	0	0	0	0	0
106	Fosthiazate	3-[butan-2-ylsulfanyl(ethoxy)phosphoryl]-1,3-thiazolidin-2-one	C9H18NO3PS2	98886-44-3	91758	CCC(C)SP(=O)(N1CCSC1=O)OCC	InChI=1S/C9H18NO3PS2/c1-4-8(3)16-14(12,13-5-2)10-6-7-15-9(10)11/h8H,4-7H2,1-3H3	283.348	2.47	Positive	M+H	Organoheterocyclic compounds	Azolidines	Thiazolidines	18	9	3	0	1	2	1	0	0	0
107	Metolachlor	2-chloro-N-(2-ethyl-6-methylphenyl)-N-(1-methoxypropan-2-yl)acetamide	C15H22ClNO2	51218-45-2	4169	CCC1=CC=CC(=C1N(C(C)COC)C(=O)CCl)C	InChI=1S/C15H22ClNO2/c1-5-13-8-6-7-11(2)15(13)17(14(18)9-16)12(3)10-19-4/h6-8,12H,5,9-10H2,1-4H3	283.794	3.24	Positive	M+H	Benzenoids	Benzene and substituted derivatives	Anilides	22	15	2	0	1	0	0	1	0	0
108	Penconazole	1-[2-(2,4-dichlorophenyl)pentyl]-1,2,4-triazole	C13H15Cl2N3	66246-88-6	91693	CCCC(CN1C=NC=N1)C2=C(C=C(C=C2)Cl)Cl	InChI=1S/C13H15Cl2N3/c1-2-3-10(7-18-9-16-8-17-18)12-5-4-11(14)6-13(12)15/h4-6,8-10H,2-3,7H2,1H3	284.184	4.67	Positive	M+H	Benzenoids	Benzene and substituted derivatives	Halobenzenes	15	13	0	0	3	0	0	2	0	0
109	Sulfachloropyridazine	4-amino-N-(6-chloropyridazin-3-yl)benzenesulfonamide	C10H9ClN4O2S	80-32-0	6634	C1=CC(=CC=C1N)S(=O)(=O)NC2=NN=C(C=C2)Cl	InChI=1S/C10H9ClN4O2S/c11-9-5-6-10(14-13-9)15-18(16,17)8-3-1-7(12)2-4-8/h1-6H,12H2,(H,14,15)	284.722	0.31	Positive	M+H	Benzenoids	Benzene and substituted derivatives	Benzenesulfonamides	9	10	2	0	4	1	0	1	0	0
110	Tris(2-chloroethyl) phosphate	tris(2-chloroethyl) phosphate	C6H12Cl3O4P	115-96-8	8295	C(CCl)OP(=O)(OCCCl)OCCCl	InChI=1S/C6H12Cl3O4P/c7-1-4-11-14(10,12-5-2-8)13-6-3-9/h1-6H2	285.49	1.63	Positive	M+H	Organic acids and derivatives	Organic phosphoric acids and derivatives	Phosphate esters	12	6	4	0	0	0	1	3	0	0
111	Dibutyl phenyl phosphate	dibutyl phenyl phosphate	C14H23O4P	2528-36-1	17312	CCCCOP(=O)(OCCCC)OC1=CC=CC=C1	InChI=1S/C14H23O4P/c1-3-5-12-16-19(15,17-13-6-4-2)18-14-10-8-7-9-11-14/h7-11H,3-6,12-13H2,1-2H3	286.304	4.11	Positive	M+H	Benzenoids	Benzene and substituted derivatives	Phenoxy compounds	23	14	4	0	0	0	1	0	0	0
112	4-Androsten-3,17-dione	(8R,9S,10R,13S,14S)-10,13-dimethyl-2,6,7,8,9,11,12,14,15,16-decahydro-1H-cyclopenta[a]phenanthrene-3,17-dione	C19H26O2	63-05-8	6128	C[C@]12CCC(=O)C=C1CC[C@@H]3[C@@H]2CC[C@]4([C@H]3CCC4=O)C	InChI=1S/C19H26O2/c1-18-9-7-13(20)11-12(18)3-4-14-15-5-6-17(21)19(15,2)10-8-16(14)18/h11,14-16H,3-10H2,1-2H3/t14-,15-,16-,18-,19-/m0/s1	286.409	2.76	Positive	M+H	Lipids and lipid-like molecules	Steroids and steroid derivatives	Androstane steroids	26	19	2	0	0	0	0	0	0	0
113	Iprobenfos	di(propan-2-yloxy)phosphorylsulfanylmethylbenzene	C13H21O3PS	26087-47-8	33294	CC(C)OP(=O)(OC(C)C)SCC1=CC=CC=C1	InChI=1S/C13H21O3PS/c1-11(2)15-17(14,16-12(3)4)18-10-13-8-6-5-7-9-13/h5-9,11-12H,10H2,1-4H3	288.343	3.57	Positive	M+H	Benzenoids	Benzene and substituted derivatives	Not avaliable	21	13	3	0	0	1	1	0	0	0
114	Estriol	(8R,9S,13S,14S,16R,17R)-13-methyl-6,7,8,9,11,12,14,15,16,17-decahydrocyclopenta[a]phenanthrene-3,16,17-triol	C18H24O3	50-27-1	5756	C[C@]12CC[C@H]3[C@H]([C@@H]1C[C@H]([C@@H]2O)O)CCC4=C3C=CC(=C4)O	InChI=1S/C18H24O3/c1-18-7-6-13-12-5-3-11(19)8-10(12)2-4-14(13)15(18)9-16(20)17(18)21/h3,5,8,13-17,19-21H,2,4,6-7,9H2,1H3/t13-,14-,15+,16-,17+,18+/m1/s1	288.4	2.81	Negative	M-H	Lipids and lipid-like molecules	Steroids and steroid derivatives	Estrane steroids	24	18	3	0	0	0	0	0	0	0
115	Terbufos	tert-butylsulfanylmethylsulfanyl-diethoxy-sulfanylidene-lambda5-phosphane	C9H21O2PS3	13071-79-9	25670	CCOP(=S)(OCC)SCSC(C)(C)C	InChI=1S/C9H21O2PS3/c1-6-10-12(13,11-7-2)15-8-14-9(3,4)5/h6-8H2,1-5H3	288.431	4.49	Positive	M+H	Organic acids and derivatives	Organic dithiophosphoric acids and derivatives	Dithiophosphate O-esters	21	9	2	0	0	3	1	0	0	0
116	Trimethoprim	5-[(3,4,5-trimethoxyphenyl)methyl]pyrimidine-2,4-diamine	C14H18N4O3	738-70-5	5578	COC1=CC(=CC(=C1OC)OC)CC2=CN=C(N=C2N)N	InChI=1S/C14H18N4O3/c1-19-10-5-8(6-11(20-2)12(10)21-3)4-9-7-17-14(16)18-13(9)15/h5-7H,4H2,1-3H3,(H4,15,16,17,18)	290.318	0.73	Positive	M+H	Benzenoids	Phenol ethers	Anisoles	18	14	3	0	4	0	0	0	0	0
117	Phorate sulfone	diethoxy-(ethylsulfonylmethylsulfanyl)-sulfanylidene-lambda5-phosphane	C7H17O4PS3	2588-04-7	17425	CCOP(=S)(OCC)SCS(=O)(=O)CC	InChI=1S/C7H17O4PS3/c1-4-10-12(13,11-5-2)14-7-15(8,9)6-3/h4-7H2,1-3H3	292.376	1.94	Positive	M+H	Organic acids and derivatives	Organic dithiophosphoric acids and derivatives	Dithiophosphate O-esters	17	7	4	0	0	3	1	0	0	0
118	Triadimefon	1-(4-chlorophenoxy)-3,3-dimethyl-1-(1,2,4-triazol-1-yl)butan-2-one	C14H16ClN3O2	43121-43-3	39385	CC(C)(C)C(=O)C(N1C=NC=N1)OC2=CC=C(C=C2)Cl	InChI=1S/C14H16ClN3O2/c1-14(2,3)12(19)13(18-9-16-8-17-18)20-11-6-4-10(15)5-7-11/h4-9,13H,1-3H3	293.749	2.94	Positive	M+H	Benzenoids	Phenol ethers	Not avaliable	16	14	2	0	3	0	0	1	0	0
119	Triadimenol	1-(4-chlorophenoxy)-3,3-dimethyl-1-(1,2,4-triazol-1-yl)butan-2-ol	C14H18ClN3O2	55219-65-3	41368	CC(C)(C)C(C(N1C=NC=N1)OC2=CC=C(C=C2)Cl)O	InChI=1S/C14H18ClN3O2/c1-14(2,3)12(19)13(18-9-16-8-17-18)20-11-6-4-10(15)5-7-11/h4-9,12-13,19H,1-3H3	295.765	2.95	Positive	M+H	Benzenoids	Phenol ethers	Not avaliable	18	14	2	0	3	0	0	1	0	0
120	36OPFHpA	2,2-difluoro-2-[1,1,2,2-tetrafluoro-2-(trifluoromethoxy)ethoxy]acetic acid	C5HF9O4	151772-58-6	2782393	C(=O)(C(OC(C(OC(F)(F)F)(F)F)(F)F)(F)F)O	InChI=1S/C5HF9O4/c6-2(7,1(15)16)17-3(8,9)4(10,11)18-5(12,13)14/h(H,15,16)	296.04	3.09	Negative	M-H	Organic acids and derivatives	Carboxylic acids and derivatives	Alpha-halocarboxylic acids and derivatives	1	5	4	9	0	0	0	0	0	0
121	Deoxynivalenol	(1R,2R,3S,7R,9R,10R,12S)-3,10-dihydroxy-2-(hydroxymethyl)-1,5-dimethylspiro[8-oxatricyclo[7.2.1.02,7]dodec-5-ene-12,2'-oxirane]-4-one	C15H20O6	51481-10-8	40024	CC1=C[C@@H]2[C@]([C@@H](C1=O)O)([C@]3(C[C@H]([C@H]([C@@]34CO4)O2)O)C)CO	InChI=1S/C15H20O6/c1-7-3-9-14(5-16,11(19)10(7)18)13(2)4-8(17)12(21-9)15(13)6-20-15/h3,8-9,11-12,16-17,19H,4-6H2,1-2H3/t8-,9-,11-,12-,13-,14-,15+/m1/s1	296.316	-0.71	Positive	M+H	Lipids and lipid-like molecules	Prenol lipids	Sesquiterpenoids	20	15	6	0	0	0	0	0	0	0
122	Imazalil	1-[2-(2,4-dichlorophenyl)-2-prop-2-enoxyethyl]imidazole	C14H14Cl2N2O	35554-44-0	37175	C=CCOC(CN1C=CN=C1)C2=C(C=C(C=C2)Cl)Cl	InChI=1S/C14H14Cl2N2O/c1-2-7-19-14(9-18-6-5-17-10-18)12-4-3-11(15)8-13(12)16/h2-6,8,10,14H,1,7,9H2	297.18	4.1	Positive	M+H	Benzenoids	Benzene and substituted derivatives	Benzylethers	14	14	1	0	2	0	0	2	0	0
123	Quinalphos	diethoxy-quinoxalin-2-yloxy-sulfanylidene-lambda5-phosphane	C12H15N2O3PS	13593-03-8	26124	CCOP(=S)(OCC)OC1=NC2=CC=CC=C2N=C1	InChI=1S/C12H15N2O3PS/c1-3-15-18(19,16-4-2)17-12-9-13-10-7-5-6-8-11(10)14-12/h5-9H,3-4H2,1-2H3	298.298	3.04	Positive	M+H	Organoheterocyclic compounds	Diazanaphthalenes	Benzodiazines	15	12	3	0	2	1	1	0	0	0
124	FBSA	1,1,2,2,3,3,4,4,4-nonafluorobutane-1-sulfonamide	C4H2F9NO2S	30334-69-1	10958205	C(C(C(F)(F)S(=O)(=O)N)(F)F)(C(F)(F)F)(F)F	InChI=1S/C4H2F9NO2S/c5-1(6,3(9,10)11)2(7,8)4(12,13)17(14,15)16/h(H2,14,15,16)	299.12	3.13	Negative	M-H	Organohalogen compounds	Alkyl halides	Alkyl fluorides	2	4	2	9	1	1	0	0	0	0
125	Ditalimfos	2-diethoxyphosphinothioylisoindole-1,3-dione	C12H14NO4PS	5131-24-8	21207	CCOP(=S)(N1C(=O)C2=CC=CC=C2C1=O)OCC	InChI=1S/C12H14NO4PS/c1-3-16-18(19,17-4-2)13-11(14)9-7-5-6-8-10(9)12(13)15/h5-8H,3-4H2,1-2H3	299.283	6.61	Positive	M+H	Organoheterocyclic compounds	Isoindoles and derivatives	Isoindolines	14	12	4	0	1	1	1	0	0	0
126	Codeine	(4R,4aR,7S,7aR,12bS)-9-methoxy-3-methyl-2,4,4a,7,7a,13-hexahydro-1H-4,12-methanobenzofuro[3,2-e]isoquinolin-7-ol	C18H21NO3	76-57-3	5284371	CN1CC[C@]23[C@@H]4[C@H]1CC5=C2C(=C(C=C5)OC)O[C@H]3[C@H](C=C4)O	InChI=1S/C18H21NO3/c1-19-8-7-18-11-4-5-13(20)17(18)22-16-14(21-2)6-3-10(15(16)18)9-12(11)19/h3-6,11-13,17,20H,7-9H2,1-2H3/t11-,12+,13-,17-,18-/m0/s1	299.364	1.28	Positive	M+H	Alkaloids and derivatives	Morphinans	Not avaliable	21	18	3	0	1	0	0	0	0	0
127	Hydrocodone	(4R,4aR,7aR,12bS)-9-methoxy-3-methyl-1,2,4,4a,5,6,7a,13-octahydro-4,12-methanobenzofuro[3,2-e]isoquinolin-7-one	C18H21NO3	125-29-1	5284569	CN1CC[C@]23[C@@H]4[C@H]1CC5=C2C(=C(C=C5)OC)O[C@H]3C(=O)CC4	InChI=1S/C18H21NO3/c1-19-8-7-18-11-4-5-13(20)17(18)22-16-14(21-2)6-3-10(15(16)18)9-12(11)19/h3,6,11-12,17H,4-5,7-9H2,1-2H3/t11-,12+,17-,18-/m0/s1	299.364	2.16	Positive	M+H	Alkaloids and derivatives	Morphinans	Not avaliable	21	18	3	0	1	0	0	0	0	0
128	Perfluorobutanesulfonic acid	1,1,2,2,3,3,4,4,4-nonafluorobutane-1-sulfonic acid	C4HF9O3S	375-73-5	67815	C(C(C(F)(F)S(=O)(=O)O)(F)F)(C(F)(F)F)(F)F	InChI=1S/C4HF9O3S/c5-1(6,3(9,10)11)2(7,8)4(12,13)17(14,15)16/h(H,14,15,16)	300.1	1.82	Negative	M-H	Organohalogen compounds	Alkyl halides	Alkyl fluorides	1	4	3	9	0	1	0	0	0	0
129	Sulfaquinoxaline	4-amino-N-quinoxalin-2-ylbenzenesulfonamide	C14H12N4O2S	59-40-5	5338	C1=CC=C2C(=C1)N=CC(=N2)NS(=O)(=O)C3=CC=C(C=C3)N	InChI=1S/C14H12N4O2S/c15-10-5-7-11(8-6-10)21(19,20)18-14-9-16-12-3-1-2-4-13(12)17-14/h1-9H,15H2,(H,17,18)	300.336	0.84	Positive	M+H	Organoheterocyclic compounds	Diazanaphthalenes	Benzodiazines	12	14	2	0	4	1	0	0	0	0
130	Allethrin	(2-methyl-4-oxo-3-prop-2-enylcyclopent-2-en-1-yl) 2,2-dimethyl-3-(2-methylprop-1-enyl)cyclopropane-1-carboxylate	C19H26O3	584-79-2	11442	CC1=C(C(=O)CC1OC(=O)C2C(C2(C)C)C=C(C)C)CC=C	InChI=1S/C19H26O3/c1-7-8-13-12(4)16(10-15(13)20)22-18(21)17-14(9-11(2)3)19(17,5)6/h7,9,14,16-17H,1,8,10H2,2-6H3	302.408	5.52	Positive	M+H	Lipids and lipid-like molecules	Fatty Acyls	Fatty acid esters	26	19	3	0	0	0	0	0	0	0
131	Pipemidic acid	8-ethyl-5-oxo-2-piperazin-1-ylpyrido[2,3-d]pyrimidine-6-carboxylic acid	C14H17N5O3	51940-44-4	4831	CCN1C=C(C(=O)C2=CN=C(N=C21)N3CCNCC3)C(=O)O	InChI=1S/C14H17N5O3/c1-2-18-8-10(13(21)22)11(20)9-7-16-14(17-12(9)18)19-5-3-15-4-6-19/h7-8,15H,2-6H2,1H3,(H,21,22)	303.317	-1.7	Positive	M+H	Organoheterocyclic compounds	Diazinanes	Piperazines	17	14	3	0	5	0	0	0	0	0
132	Triallate	S-(2,3,3-trichloroprop-2-enyl) N,N-di(propan-2-yl)carbamothioate	C10H16Cl3NOS	2303-17-5	5543	CC(C)N(C(C)C)C(=O)SCC(=C(Cl)Cl)Cl	InChI=1S/C10H16Cl3NOS/c1-6(2)14(7(3)4)10(15)16-5-8(11)9(12)13/h6-7H,5H2,1-4H3	304.664	4.57	Positive	M+H	Organosulfur compounds	Thiocarbonyl compounds	Thiocarbamic acid derivatives	16	10	1	0	1	1	0	3	0	0
133	Pirimiphos-methyl	4-dimethoxyphosphinothioyloxy-N,N-diethyl-6-methylpyrimidin-2-amine	C11H20N3O3PS	29232-93-7	34526	CCN(CC)C1=NC(=CC(=N1)OP(=S)(OC)OC)C	InChI=1S/C11H20N3O3PS/c1-6-14(7-2)11-12-9(3)8-10(13-11)17-18(19,15-4)16-5/h8H,6-7H2,1-5H3	305.334	4	Positive	M+H	Organic acids and derivatives	Organic thiophosphoric acids and derivatives	Thiophosphoric acid esters	20	11	3	0	3	1	1	0	0	0
134	Butyl diphenyl phosphate	butyl diphenyl phosphate	C16H19O4P	2752-95-6	17682	CCCCOP(=O)(OC1=CC=CC=C1)OC2=CC=CC=C2	InChI=1S/C16H19O4P/c1-2-3-14-18-21(17,19-15-10-6-4-7-11-15)20-16-12-8-5-9-13-16/h4-13H,2-3,14H2,1H3	306.293	4.41	Positive	M+H	Organic acids and derivatives	Organic phosphoric acids and derivatives	Phosphate esters	19	16	4	0	0	0	1	0	0	0
135	Tebuconazole	1-(4-chlorophenyl)-4,4-dimethyl-3-(1,2,4-triazol-1-ylmethyl)pentan-3-ol	C16H22ClN3O	107534-96-3	86102	CC(C)(C)C(CCC1=CC=C(C=C1)Cl)(CN2C=NC=N2)O	InChI=1S/C16H22ClN3O/c1-15(2,3)16(21,10-20-12-18-11-19-20)9-8-13-4-6-14(17)7-5-13/h4-7,11-12,21H,8-10H2,1-3H3	307.818	3.89	Positive	M+H	Benzenoids	Benzene and substituted derivatives	Phenylbutylamines	22	16	1	0	3	0	0	1	0	0
136	Quinoxyfen	5,7-dichloro-4-(4-fluorophenoxy)quinoline	C15H8Cl2FNO	124495-18-7	3391107	C1=CC(=CC=C1OC2=C3C(=CC(=CC3=NC=C2)Cl)Cl)F	InChI=1S/C15H8Cl2FNO/c16-9-7-12(17)15-13(8-9)19-6-5-14(15)20-11-3-1-10(18)2-4-11/h1-8H	308.135	5.69	Positive	M+H	Organic oxygen compounds	Organooxygen compounds	Ethers	8	15	1	1	1	0	0	2	0	0
137	Fensulfothion	diethoxy-(4-methylsulfinylphenoxy)-sulfanylidene-lambda5-phosphane	C11H17O4PS2	115-90-2	8292	CCOP(=S)(OCC)OC1=CC=C(C=C1)S(=O)C	InChI=1S/C11H17O4PS2/c1-4-13-16(17,14-5-2)15-10-6-8-11(9-7-10)18(3)12/h6-9H,4-5H2,1-3H3	308.354	2.35	Positive	M+H	Organic acids and derivatives	Organic thiophosphoric acids and derivatives	Thiophosphoric acid esters	17	11	4	0	0	2	1	0	0	0
138	Tripentyl phosphate	tripentyl phosphate	C15H33O4P	2528-38-3	75665	CCCCCOP(=O)(OCCCCC)OCCCCC	InChI=1S/C15H33O4P/c1-4-7-10-13-17-20(16,18-14-11-8-5-2)19-15-12-9-6-3/h4-15H2,1-3H3	308.394	5.29	Positive	M+H	Organic acids and derivatives	Organic phosphoric acids and derivatives	Phosphate esters	33	15	4	0	0	0	1	0	0	0
139	Sulfadoxine	4-amino-N-(5,6-dimethoxypyrimidin-4-yl)benzenesulfonamide	C12H14N4O4S	2447-57-6	17134	COC1=C(N=CN=C1OC)NS(=O)(=O)C2=CC=C(C=C2)N	InChI=1S/C12H14N4O4S/c1-19-10-11(14-7-15-12(10)20-2)16-21(17,18)9-5-3-8(13)4-6-9/h3-7H,13H2,1-2H3,(H,14,15,16)	310.329	-0.24	Positive	M+H	Benzenoids	Benzene and substituted derivatives	Benzenesulfonamides	14	12	4	0	4	1	0	0	0	0
140	Sulfadimethoxine	4-amino-N-(2,6-dimethoxypyrimidin-4-yl)benzenesulfonamide	C12H14N4O4S	122-11-2	5323	COC1=NC(=NC(=C1)NS(=O)(=O)C2=CC=C(C=C2)N)OC	InChI=1S/C12H14N4O4S/c1-19-11-7-10(14-12(15-11)20-2)16-21(17,18)9-5-3-8(13)4-6-9/h3-7H,13H2,1-2H3,(H,14,15,16)	310.329	1.17	Positive	M+H	Benzenoids	Benzene and substituted derivatives	Benzenesulfonamides	14	12	4	0	4	1	0	0	0	0
141	Edifenphos	[ethoxy(phenylsulfanyl)phosphoryl]sulfanylbenzene	C14H15O2PS2	17109-49-8	28292	CCOP(=O)(SC1=CC=CC=C1)SC2=CC=CC=C2	InChI=1S/C14H15O2PS2/c1-2-16-17(15,18-13-9-5-3-6-10-13)19-14-11-7-4-8-12-14/h3-12H,2H2,1H3	310.372	3.61	Positive	M+H	Benzenoids	Benzene and substituted derivatives	Not avaliable	15	14	2	0	0	2	1	0	0	0
142	Fenamidone	(5S)-3-anilino-5-methyl-2-methylsulfanyl-5-phenylimidazol-4-one	C17H17N3OS	161326-34-7	10403199	C[C@@]1(C(=O)N(C(=N1)SC)NC2=CC=CC=C2)C3=CC=CC=C3	InChI=1S/C17H17N3OS/c1-17(13-9-5-3-6-10-13)15(21)20(16(18-17)22-2)19-14-11-7-4-8-12-14/h3-12,19H,1-2H3/t17-/m0/s1	311.401	3.45	Positive	M+H	Organic acids and derivatives	Carboxylic acids and derivatives	Amino acids, peptides, and analogues	17	17	1	0	3	1	0	0	0	0
143	Butachlor	N-(butoxymethyl)-2-chloro-N-(2,6-diethylphenyl)acetamide	C17H26ClNO2	23184-66-9	31677	CCCCOCN(C1=C(C=CC=C1CC)CC)C(=O)CCl	InChI=1S/C17H26ClNO2/c1-4-7-11-21-13-19(16(20)12-18)17-14(5-2)9-8-10-15(17)6-3/h8-10H,4-7,11-13H2,1-3H3	311.8	4.84	Positive	M+H	Benzenoids	Benzene and substituted derivatives	Anilides	26	17	2	0	1	0	0	1	0	0
144	Pretilachlor	2-chloro-N-(2,6-diethylphenyl)-N-(2-propoxyethyl)acetamide	C17H26ClNO2	51218-49-6	91644	CCCOCCN(C1=C(C=CC=C1CC)CC)C(=O)CCl	InChI=1S/C17H26ClNO2/c1-4-11-21-12-10-19(16(20)13-18)17-14(5-2)8-7-9-15(17)6-3/h7-9H,4-6,10-13H2,1-3H3	311.847	4.29	Positive	M+H	Benzenoids	Benzene and substituted derivatives	Anilides	26	17	2	0	1	0	0	1	0	0
145	Aflatoxin B1	(3S,7R)-11-methoxy-6,8,19-trioxapentacyclo[10.7.0.02,9.03,7.013,17]nonadeca-1,4,9,11,13(17)-pentaene-16,18-dione	C17H12O6	1162-65-8	186907	COC1=C2C3=C(C(=O)CC3)C(=O)OC2=C4[C@@H]5C=CO[C@@H]5OC4=C1	InChI=1S/C17H12O6/c1-20-10-6-11-14(8-4-5-21-17(8)22-11)15-13(10)7-2-3-9(18)12(7)16(19)23-15/h4-6,8,17H,2-3H2,1H3/t8-,17+/m0/s1	312.274	1.23	Positive	M+H	Phenylpropanoids and polyketides	Coumarins and derivatives	Furanocoumarins	12	17	6	0	0	0	0	0	0	0
146	Nivalenol	(1S,2R,3S,7R,9R,10R,11S,12S)-3,10,11-trihydroxy-2-(hydroxymethyl)-1,5-dimethylspiro[8-oxatricyclo[7.2.1.02,7]dodec-5-ene-12,2'-oxirane]-4-one	C15H20O7	23282-20-4	5284433	CC1=C[C@@H]2[C@]([C@@H](C1=O)O)([C@]3([C@@H]([C@H]([C@H]([C@@]34CO4)O2)O)O)C)CO	InChI=1S/C15H20O7/c1-6-3-7-14(4-16,11(20)8(6)17)13(2)10(19)9(18)12(22-7)15(13)5-21-15/h3,7,9-12,16,18-20H,4-5H2,1-2H3/t7-,9-,10-,11-,12-,13-,14-,15+/m1/s1	312.315	-2.24	Positive	M+H	Lipids and lipid-like molecules	Prenol lipids	Sesquiterpenoids	20	15	7	0	0	0	0	0	0	0
147	Isoxathion	diethoxy-[(5-phenyl-1,2-oxazol-3-yl)oxy]-sulfanylidene-lambda5-phosphane	C13H16NO4PS	18854-01-8	29307	CCOP(=S)(OCC)OC1=NOC(=C1)C2=CC=CC=C2	InChI=1S/C13H16NO4PS/c1-3-15-19(20,16-4-2)18-13-10-12(17-14-13)11-8-6-5-7-9-11/h5-10H,3-4H2,1-2H3	313.309	3.9	Positive	M+H	Organic acids and derivatives	Organic thiophosphoric acids and derivatives	Thiophosphoric acid esters	16	13	4	0	1	1	1	0	0	0
148	Triazophos	diethoxy-[(1-phenyl-1,2,4-triazol-3-yl)oxy]-sulfanylidene-lambda5-phosphane	C12H16N3O3PS	24017-47-8	32184	CCOP(=S)(OCC)OC1=NN(C=N1)C2=CC=CC=C2	InChI=1S/C12H16N3O3PS/c1-3-16-19(20,17-4-2)18-12-13-10-15(14-12)11-8-6-5-7-9-11/h5-10H,3-4H2,1-2H3	313.312	3.37	Positive	M+H	Organoheterocyclic compounds	Azoles	Triazoles	16	12	3	0	3	1	1	0	0	0
149	Kresoxim-methyl	methyl (2Z)-2-methoxyimino-2-[2-[(2-methylphenoxy)methyl]phenyl]acetate	C18H19NO4	143390-89-0	5483874	CC1=CC=CC=C1OCC2=CC=CC=C2/C(=N\OC)/C(=O)OC	InChI=1S/C18H19NO4/c1-13-8-4-7-11-16(13)23-12-14-9-5-6-10-15(14)17(19-22-3)18(20)21-2/h4-11H,12H2,1-3H3/b19-17-	313.348	5.88	Positive	M+H	Benzenoids	Phenol ethers	Not avaliable	19	18	4	0	1	0	0	0	0	0
150	Perfluorohexanoic acid	2,2,3,3,4,4,5,5,6,6,6-undecafluorohexanoic acid	C6HF11O2	307-24-4	67542	C(=O)(C(C(C(C(C(F)(F)F)(F)F)(F)F)(F)F)(F)F)O	InChI=1S/C6HF11O2/c7-2(8,1(18)19)3(9,10)4(11,12)5(13,14)6(15,16)17/h(H,18,19)	314.053	3.48	Negative	M-H	Organohalogen compounds	Alkyl halides	Alkyl fluorides	1	6	2	11	0	0	0	0	0	0
151	Aflatoxin B2	(3S,7R)-11-methoxy-6,8,19-trioxapentacyclo[10.7.0.02,9.03,7.013,17]nonadeca-1,9,11,13(17)-tetraene-16,18-dione	C17H14O6	7220-81-7	2724360	COC1=C2C3=C(C(=O)CC3)C(=O)OC2=C4[C@@H]5CCO[C@@H]5OC4=C1	InChI=1S/C17H14O6/c1-20-10-6-11-14(8-4-5-21-17(8)22-11)15-13(10)7-2-3-9(18)12(7)16(19)23-15/h6,8,17H,2-5H2,1H3/t8-,17+/m0/s1	314.289	1.45	Positive	M+H	Phenylpropanoids and polyketides	Coumarins and derivatives	Furanocoumarins	14	17	6	0	0	0	0	0	0	0
152	Sulfaphenazole	4-amino-N-(2-phenylpyrazol-3-yl)benzenesulfonamide	C15H14N4O2S	526-08-9	5335	C1=CC=C(C=C1)N2C(=CC=N2)NS(=O)(=O)C3=CC=C(C=C3)N	InChI=1S/C15H14N4O2S/c16-12-6-8-14(9-7-12)22(20,21)18-15-10-11-17-19(15)13-4-2-1-3-5-13/h1-11,18H,16H2	314.362	1.54	Positive	M+H	Organoheterocyclic compounds	Azoles	Pyrazoles	14	15	2	0	4	1	0	0	0	0
153	Butifos	1-bis(butylsulfanyl)phosphorylsulfanylbutane	C12H27OPS3	78-48-8	5125	CCCCSP(=O)(SCCCC)SCCCC	InChI=1S/C12H27OPS3/c1-4-7-10-15-14(13,16-11-8-5-2)17-12-9-6-3/h4-12H2,1-3H3	314.511	5.75	Positive	M+H	Organophosphorus compounds	Organothiophosphorus compounds	Not avaliable	27	12	1	0	0	3	1	0	0	0
154	Dichlofenthion	(2,4-dichlorophenoxy)-diethoxy-sulfanylidene-lambda5-phosphane	C10H13Cl2O3PS	97-17-6	7328	CCOP(=S)(OCC)OC1=C(C=C(C=C1)Cl)Cl	InChI=1S/C10H13Cl2O3PS/c1-3-13-16(17,14-4-2)15-10-6-5-8(11)7-9(10)12/h5-7H,3-4H2,1-2H3	315.153	5.2	Positive	M+H	Organic acids and derivatives	Organic thiophosphoric acids and derivatives	Thiophosphoric acid esters	13	10	3	0	0	1	1	2	0	0
155	PFEESA	1,1,2,2-tetrafluoro-2-(1,1,2,2,2-pentafluoroethoxy)ethanesulfonic acid	C4HF9O4S	113507-82-7	2776108	C(C(F)(F)F)(OC(C(F)(F)S(=O)(=O)O)(F)F)(F)F	InChI=1S/C4HF9O4S/c5-1(6,7)2(8,9)17-3(10,11)4(12,13)18(14,15)16/h(H,14,15,16)	316.1	2.25	Negative	M-H	Organic acids and derivatives	Organic sulfonic acids and derivatives	Organosulfonic acids and derivatives	1	4	4	9	0	1	0	0	0	0
156	Bupirimate	[5-butyl-2-(ethylamino)-6-methylpyrimidin-4-yl] N,N-dimethylsulfamate	C13H24N4O3S	41483-43-6	38884	CCCCC1=C(N=C(N=C1OS(=O)(=O)N(C)C)NCC)C	InChI=1S/C13H24N4O3S/c1-6-8-9-11-10(3)15-13(14-7-2)16-12(11)20-21(18,19)17(4)5/h6-9H2,1-5H3,(H,14,15,16)	316.42	2.68	Positive	M+H	Organoheterocyclic compounds	Diazines	Pyrimidines and pyrimidine derivatives	24	13	3	0	4	1	0	0	0	0
157	Zearalenone	(4S,12E)-16,18-dihydroxy-4-methyl-3-oxabicyclo[12.4.0]octadeca-1(14),12,15,17-tetraene-2,8-dione	C18H22O5	17924-92-4	5281576	C[C@H]1CCCC(=O)CCC/C=C/C2=C(C(=CC(=C2)O)O)C(=O)O1	InChI=1S/C18H22O5/c1-12-6-5-9-14(19)8-4-2-3-7-13-10-15(20)11-16(21)17(13)18(22)23-12/h3,7,10-12,20-21H,2,4-6,8-9H2,1H3/b7-3+/t12-/m0/s1	318.364	3.58	Negative	M-H	Phenylpropanoids and polyketides	Macrolides and analogues	Zearalenones	23	13	3	0	2	1	1	0	0	0
158	Tebupirimfos	(2-tert-butylpyrimidin-5-yl)oxy-ethoxy-propan-2-yloxy-sulfanylidene-lambda5-phosphane	C13H23N2O3PS	96182-53-5	93516	CCOP(=S)(OC1=CN=C(N=C1)C(C)(C)C)OC(C)C	InChI=1S/C13H23N2O3PS/c1-7-16-19(20,17-10(2)3)18-11-8-14-12(15-9-11)13(4,5)6/h8-10H,7H2,1-6H3	318.372	4.19	Positive	M+H	Organic acids and derivatives	Organic thiophosphoric acids and derivatives	Thiophosphoric acid esters	22	18	5	0	0	0	0	0	0	0
159	Norfloxacin	1-ethyl-6-fluoro-4-oxo-7-piperazin-1-ylquinoline-3-carboxylic acid	C16H18FN3O3	70458-96-7	4539	CCN1C=C(C(=O)C2=CC(=C(C=C21)N3CCNCC3)F)C(=O)O	InChI=1S/C16H18FN3O3/c1-2-19-9-11(16(22)23)15(21)10-7-12(17)14(8-13(10)19)20-5-3-18-4-6-20/h7-9,18H,2-6H2,1H3,(H,22,23)	319.331	-0.31	Positive	M+H	Organoheterocyclic compounds	Quinolines and derivatives	Quinoline carboxylic acids	18	16	3	1	3	0	0	0	0	0
160	Enoxacin	1-ethyl-6-fluoro-4-oxo-7-piperazin-1-yl-1,8-naphthyridine-3-carboxylic acid	C15H17FN4O3	74011-58-8	3229	CCN1C=C(C(=O)C2=CC(=C(N=C21)N3CCNCC3)F)C(=O)O	InChI=1S/C15H17FN4O3/c1-2-19-8-10(15(22)23)12(21)9-7-11(16)14(18-13(9)19)20-5-3-17-4-6-20/h7-8,17H,2-6H2,1H3,(H,22,23)	320.319	-0.21	Positive	M+H	Organoheterocyclic compounds	Diazanaphthalenes	Naphthyridines	17	15	3	1	4	0	0	0	0	0
161	Zearalanone	(4S)-16,18-dihydroxy-4-methyl-3-oxabicyclo[12.4.0]octadeca-1(14),15,17-triene-2,8-dione	C18H24O5	5975-78-0	108003	C[C@H]1CCCC(=O)CCCCCC2=C(C(=CC(=C2)O)O)C(=O)O1	InChI=1S/C18H24O5/c1-12-6-5-9-14(19)8-4-2-3-7-13-10-15(20)11-16(21)17(13)18(22)23-12/h10-12,20-21H,2-9H2,1H3/t12-/m0/s1	320.38	4.86	Negative	M-H	Phenylpropanoids and polyketides	Macrolides and analogues	Zearalenones	24	18	5	0	0	0	0	0	0	0
162	α-Zearalenol	(4R,8R,12E)-8,16,18-trihydroxy-4-methyl-3-oxabicyclo[12.4.0]octadeca-1(14),12,15,17-tetraen-2-one	C18H24O5	36455-72-8	13932155	C[C@@H]1CCC[C@@H](CCC/C=C\c2cc(cc(c2C(=O)O1)O)O)O	InChI=1S/C18H24O5/c1-12-6-5-9-14(19)8-4-2-3-7-13-10-15(20)11-16(21)17(13)18(22)23-12/h3,7,10-12,14,19-21H,2,4-6,8-9H2,1H3/b7-3+/t12-,14-/m1/s1	320.38	4.09	Negative	M-H	Phenylpropanoids and polyketides	Macrolides and analogues	Not avaliable	24	18	5	0	0	0	0	0	0	0
163	β-Zearalenol	(4R,8R,12E)-8,16,18-trihydroxy-4-methyl-3-oxabicyclo[12.4.0]octadeca-1(14),12,15,17-tetraen-2-one	C18H24O5	71030-11-0	13932155	O=C1O[C@@H](CCC[C@H](O)CCC\C=C\c2cc(O)cc(O)c12)C	InChI=1S/C18H24O5/c1-12-6-5-9-14(19)8-4-2-3-7-13-10-15(20)11-16(21)17(13)18(22)23-12/h3,7,10-12,14,19-21H,2,4-6,8-9H2,1H3/b7-3+/t12-,14-/m1/s1	320.38	4.09	Negative	M-H	Phenylpropanoids and polyketides	Macrolides and analogues	Not avaliable	24	18	5	0	0	0	0	0	0	0
164	Terbufos sulfone	tert-butylsulfonylmethylsulfanyl-diethoxy-sulfanylidene-lambda5-phosphane	C9H21O4PS3	56070-16-7	41718	CCOP(=S)(OCC)SCS(=O)(=O)C(C)(C)C	InChI=1S/C9H21O4PS3/c1-6-12-14(15,13-7-2)16-8-17(10,11)9(3,4)5/h6-8H2,1-5H3	320.429	2.46	Positive	M+H	Organic acids and derivatives	Organic dithiophosphoric acids and derivatives	Dithiophosphate O-esters	21	9	4	0	0	3	1	0	0	0
165	Pyriproxyfen	2-[1-(4-phenoxyphenoxy)propan-2-yloxy]pyridine	C20H19NO3	95737-68-1	91753	CC(COC1=CC=C(C=C1)OC2=CC=CC=C2)OC3=CC=CC=N3	InChI=1S/C20H19NO3/c1-16(23-20-9-5-6-14-21-20)15-22-17-10-12-19(13-11-17)24-18-7-3-2-4-8-18/h2-14,16H,15H2,1H3	321.37	5.55	Positive	M+H	Benzenoids	Benzene and substituted derivatives	Diphenylethers	19	20	3	0	1	0	0	0	0	0
166	Sulfotep	diethoxyphosphinothioyloxy-diethoxy-sulfanylidene-lambda5-phosphane	C8H20O5P2S2	3689-24-5	19395	CCOP(=S)(OCC)OP(=S)(OCC)OCC	InChI=1S/C8H20O5P2S2/c1-5-9-14(16,10-6-2)13-15(17,11-7-3)12-8-4/h5-8H2,1-4H3	322.319	3.98	Positive	M+H	Organic acids and derivatives	Organic thiophosphoric acids and derivatives	Thiophosphoric acid esters	20	8	5	0	0	2	2	0	0	0
167	α-Zearalanol	(4S,8R)-8,16,18-trihydroxy-4-methyl-3-oxabicyclo[12.4.0]octadeca-1(14),15,17-trien-2-one	C18H26O5	26538-44-3	2999413	C[C@H]1CCC[C@@H](CCCCCC2=C(C(=CC(=C2)O)O)C(=O)O1)O	InChI=1S/C18H26O5/c1-12-6-5-9-14(19)8-4-2-3-7-13-10-15(20)11-16(21)17(13)18(22)23-12/h10-12,14,19-21H,2-9H2,1H3/t12-,14+/m0/s1	322.396	5.37	Negative	M-H	Phenylpropanoids and polyketides	Macrolides and analogues	Not avaliable	26	18	5	0	0	0	0	0	0	0
168	β-Zearalanol	(4S,8S)-8,16,18-trihydroxy-4-methyl-3-oxabicyclo[12.4.0]octadeca-1(14),15,17-trien-2-one	C18H26O5	42422-68-4	65434	C[C@H]1CCC[C@H](CCCCCC2=C(C(=CC(=C2)O)O)C(=O)O1)O	InChI=1S/C18H26O5/c1-12-6-5-9-14(19)8-4-2-3-7-13-10-15(20)11-16(21)17(13)18(22)23-12/h10-12,14,19-21H,2-9H2,1H3/t12-,14-/m0/s1	322.396	5.37	Negative	M-H	Phenylpropanoids and polyketides	Macrolides and analogues	Not avaliable	26	18	5	0	0	0	0	0	0	0
169	Chloramphenicol	2,2-dichloro-N-[(1R,2R)-1,3-dihydroxy-1-(4-nitrophenyl)propan-2-yl]acetamide	C11H12Cl2N2O5	56-75-7	5959	C1=CC(=CC=C1[C@H]([C@@H](CO)NC(=O)C(Cl)Cl)O)[N+](=O)[O-]	InChI=1S/C11H12Cl2N2O5/c12-10(13)11(18)14-8(5-16)9(17)6-1-3-7(4-2-6)15(19)20/h1-4,8-10,16-17H,5H2,(H,14,18)/t8-,9-/m1/s1	323.129	0.92	Negative	M-H	Benzenoids	Benzene and substituted derivatives	Nitrobenzenes	12	11	5	0	2	0	0	2	0	0
170	Flutolanil	N-(3-propan-2-yloxyphenyl)-2-(trifluoromethyl)benzamide	C17H16F3NO2	66332-96-5	47898	CC(C)OC1=CC=CC(=C1)NC(=O)C2=CC=CC=C2C(F)(F)F	InChI=1S/C17H16F3NO2/c1-11(2)23-13-7-5-6-12(10-13)21-16(22)14-8-3-4-9-15(14)17(18,19)20/h3-11H,1-2H3,(H,21,22)	323.31	4.65	Positive	M+H	Benzenoids	Benzene and substituted derivatives	Anilides	16	17	2	3	1	0	0	0	0	0
171	Sterigmatocystin	(3S,7R)-15-hydroxy-11-methoxy-6,8,20-trioxapentacyclo[10.8.0.02,9.03,7.014,19]icosa-1,4,9,11,14,16,18-heptaen-13-one	C18H12O6	10048-13-2	5280389	COC1=C2C(=C3[C@@H]4C=CO[C@@H]4OC3=C1)OC5=CC=CC(=C5C2=O)O	InChI=1S/C18H12O6/c1-21-11-7-12-13(8-5-6-22-18(8)24-12)17-15(11)16(20)14-9(19)3-2-4-10(14)23-17/h2-8,18-19H,1H3/t8-,18+/m0/s1	324.284	4.15	Positive	M+H	Phenylpropanoids and polyketides	Sterigmatocystins	Not avaliable	12	18	6	0	0	0	0	0	0	0
172	Triphenyl phosphate	triphenyl phosphate	C18H15O4P	115-86-6	8289	C1=CC=C(C=C1)OP(=O)(OC2=CC=CC=C2)OC3=CC=CC=C3	InChI=1S/C18H15O4P/c19-23(20-16-10-4-1-5-11-16,21-17-12-6-2-7-13-17)22-18-14-8-3-9-15-18/h1-15H	326.283	4.7	Positive	M+H	Organic acids and derivatives	Organic phosphoric acids and derivatives	Phosphate esters	15	18	4	0	0	0	1	0	0	0
173	Gliotoxin	(1R,7S,8S,11R)-7-hydroxy-11-(hydroxymethyl)-15-methyl-12,13-dithia-9,15-diazatetracyclo[9.2.2.01,9.03,8]pentadeca-3,5-diene-10,14-dione	C13H14N2O4S2	67-99-2	6223	CN1C(=O)[C@]23CC4=CC=C[C@@H]([C@H]4N2C(=O)[C@]1(SS3)CO)O	InChI=1S/C13H14N2O4S2/c1-14-10(18)12-5-7-3-2-4-8(17)9(7)15(12)11(19)13(14,6-16)21-20-12/h2-4,8-9,16-17H,5-6H2,1H3/t8-,9-,12+,13+/m0/s1	326.391	2.9	Positive	M+H	Organoheterocyclic compounds	Diazinanes	Piperazines	14	13	4	0	2	2	0	0	0	0
174	Tris(1-chloropropyl) phosphate	tris(1-chloropropyl) phosphate	C9H18Cl3O4P	13674-84-5	21989372	CCC(OP(=O)(OC(CC)Cl)OC(CC)Cl)Cl	InChI=1S/C9H18Cl3O4P/c1-4-7(10)14-17(13,15-8(11)5-2)16-9(12)6-3/h7-9H,4-6H2,1-3H3	327.57	2.89	Positive	M+H	Organic acids and derivatives	Organic phosphoric acids and derivatives	Phosphate esters	18	9	4	0	0	0	1	3	0	0
175	Tris(3-chloropropyl) phosphate	tris(3-chloropropyl) phosphate	C9H18Cl3O4P	1067-98-7	14034	C(COP(=O)(OCCCCl)OCCCCl)CCl	InChI=1S/C9H18Cl3O4P/c10-4-1-7-14-17(13,15-8-2-5-11)16-9-3-6-12/h1-9H2	327.57	3.11	Positive	M+H	Organic acids and derivatives	Organic phosphoric acids and derivatives	Phosphate esters	18	9	4	0	0	0	1	3	0	0
176	4:2FTS	3,3,4,4,5,5,6,6,6-nonafluorohexane-1-sulfonic acid	C6H5F9O3S	757124-72-4	20734543	C(CS(=O)(=O)O)C(C(C(C(F)(F)F)(F)F)(F)F)(F)F	InChI=1S/C6H5F9O3S/c7-3(8,1-2-19(16,17)18)4(9,10)5(11,12)6(13,14)15/h1-2H2,(H,16,17,18)	328.15	1.32	Negative	M-H	Organic acids and derivatives	Organic sulfonic acids and derivatives	Organosulfonic acids and derivatives	5	6	3	9	0	1	0	0	0	0
177	Aflatoxin G1	11-methoxy-6,8,16,20-tetraoxapentacyclo[10.8.0.02,9.03,7.013,18]icosa-1,4,9,11,13(18)-pentaene-17,19-dione	C17H12O7	1165-39-5	14421	COC1=C2C3=C(C(=O)OCC3)C(=O)OC2=C4C5C=COC5OC4=C1	InChI=1S/C17H12O7/c1-20-9-6-10-12(8-3-5-22-17(8)23-10)14-11(9)7-2-4-21-15(18)13(7)16(19)24-14/h3,5-6,8,17H,2,4H2,1H3	328.273	0.5	Positive	M+H	Phenylpropanoids and polyketides	Coumarins and derivatives	Furanocoumarins	12	17	7	0	0	0	0	0	0	0
178	HFPO-DA	2,3,3,3-tetrafluoro-2-(1,1,2,2,3,3,3-heptafluoropropoxy)propanoic acid	C6HF11O3	13252-13-6	114481	C(=O)(C(C(F)(F)F)(OC(C(C(F)(F)F)(F)F)(F)F)F)O	InChI=1S/C6HF11O3/c7-2(1(18)19,4(10,11)12)20-6(16,17)3(8,9)5(13,14)15/h(H,18,19)	330.05	3.36	Negative	M-H	Organic acids and derivatives	Carboxylic acids and derivatives	Alpha-halocarboxylic acids and derivatives	1	6	3	11	0	0	0	0	0	0
179	Aflatoxin G2	(3S,7R)-11-methoxy-6,8,16,20-tetraoxapentacyclo[10.8.0.02,9.03,7.013,18]icosa-1,9,11,13(18)-tetraene-17,19-dione	C17H14O7	7241-98-7	2724362	COC1=C2C3=C(C(=O)OCC3)C(=O)OC2=C4[C@@H]5CCO[C@@H]5OC4=C1	InChI=1S/C17H14O7/c1-20-9-6-10-12(8-3-5-22-17(8)23-10)14-11(9)7-2-4-21-15(18)13(7)16(19)24-14/h6,8,17H,2-5H2,1H3/t8-,17+/m0/s1	330.289	0.71	Positive	M+H	Phenylpropanoids and polyketides	Coumarins and derivatives	Furanocoumarins	14	17	7	0	0	0	0	0	0	0
180	Fenarimol	(2-chlorophenyl)-(4-chlorophenyl)-pyrimidin-5-ylmethanol	C17H12Cl2N2O	60168-88-9	43226	C1=CC=C(C(=C1)C(C2=CC=C(C=C2)Cl)(C3=CN=CN=C3)O)Cl	InChI=1S/C17H12Cl2N2O/c18-14-7-5-12(6-8-14)17(22,13-9-20-11-21-10-13)15-3-1-2-4-16(15)19/h1-11,22H	331.196	3.62	Positive	M+H	Benzenoids	Benzene and substituted derivatives	Diphenylmethanes	12	17	1	0	2	0	0	2	0	0
181	Ciprofloxacin	1-cyclopropyl-6-fluoro-4-oxo-7-piperazin-1-ylquinoline-3-carboxylic acid	C17H18FN3O3	85721-33-1	2764	C1CC1N2C=C(C(=O)C3=CC(=C(C=C32)N4CCNCC4)F)C(=O)O	InChI=1S/C17H18FN3O3/c18-13-7-11-14(8-15(13)20-5-3-19-4-6-20)21(10-1-2-10)9-12(16(11)22)17(23)24/h7-10,19H,1-6H2,(H,23,24)	331.341	0	Positive	M+H	Organoheterocyclic compounds	Quinolines and derivatives	Quinoline carboxylic acids	18	17	3	1	3	0	0	0	0	0
182	Isofenphos-methyl	propan-2-yl 2-[methoxy-(propan-2-ylamino)phosphinothioyl]oxybenzoate	C14H22NO4PS	99675-03-3	127394	CC(C)NP(=S)(OC)OC1=CC=CC=C1C(=O)OC(C)C	InChI=1S/C14H22NO4PS/c1-10(2)15-20(21,17-5)19-13-9-7-6-8-12(13)14(16)18-11(3)4/h6-11H,1-5H3,(H,15,21)	331.368	3.5	Positive	M+H	Benzenoids	Benzene and substituted derivatives	Benzoic acids and derivatives	22	14	4	0	1	1	1	0	0	0
183	Tetramethrin	(1,3-dioxo-4,5,6,7-tetrahydroisoindol-2-yl)methyl 2,2-dimethyl-3-(2-methylprop-1-enyl)cyclopropane-1-carboxylate	C19H25NO4	7696-12-0	83975	CC(=CC1C(C1(C)C)C(=O)OCN2C(=O)C3=C(C2=O)CCCC3)C	InChI=1S/C19H25NO4/c1-11(2)9-14-15(19(14,3)4)18(23)24-10-20-16(21)12-7-5-6-8-13(12)17(20)22/h9,14-15H,5-8,10H2,1-4H3	331.406	5.54	Positive	M+H	Organoheterocyclic compounds	Isoindoles and derivatives	Isoindolines	25	19	4	0	1	0	0	0	0	0
184	Spectinomycin	(1R,3S,5R,8R,10R,11S,12S,13R,14S)-8,12,14-trihydroxy-5-methyl-11,13-bis(methylamino)-2,4,9-trioxatricyclo[8.4.0.03,8]tetradecan-7-one	C14H24N2O7	1695-77-8	15541	C[C@@H]1CC(=O)[C@]2([C@@H](O1)O[C@@H]3[C@H]([C@@H]([C@@H]([C@@H]([C@H]3O2)NC)O)NC)O)O	InChI=1S/C14H24N2O7/c1-5-4-6(17)14(20)13(21-5)22-12-10(19)7(15-2)9(18)8(16-3)11(12)23-14/h5,7-13,15-16,18-20H,4H2,1-3H3/t5-,7-,8+,9+,10+,11-,12-,13+,14+/m1/s1	332.35	-0.82	Positive	M+H	Organoheterocyclic compounds	Dioxanes	1,4-dioxanes	24	14	7	0	2	0	0	0	0	0
185	Tebufenpyrad	N-[(4-tert-butylphenyl)methyl]-4-chloro-5-ethyl-2-methylpyrazole-3-carboxamide	C18H24ClN3O	119168-77-3	86354	CCC1=NN(C(=C1Cl)C(=O)NCC2=CC=C(C=C2)C(C)(C)C)C	InChI=1S/C18H24ClN3O/c1-6-14-15(19)16(22(5)21-14)17(23)20-11-12-7-9-13(10-8-12)18(2,3)4/h7-10H,6,11H2,1-5H3,(H,20,23)	333.856	5.76	Positive	M+H	Benzenoids	Benzene and substituted derivatives	Phenylpropanes	24	18	1	0	3	0	0	1	0	0
186	2-NP-AMOZ	5-(morpholin-4-ylmethyl)-3-[(E)-(2-nitrophenyl)methylideneamino]-1,3-oxazolidin-2-one	C15H18N4O5	183193-59-1	53393538	C1COCCN1CC2CN(C(=O)O2)/N=C/C3=CC=CC=C3[N+](=O)[O-]	InChI=1S/C15H18N4O5/c20-15-18(11-13(24-15)10-17-5-7-23-8-6-17)16-9-12-3-1-2-4-14(12)19(21)22/h1-4,9,13H,5-8,10-11H2/b16-9+	334.327	0.88	Positive	M+H	Benzenoids	Benzene and substituted derivatives	Nitrobenzenes	18	15	5	0	4	0	0	0	0	0
187	Fenbuconazole	4-(4-chlorophenyl)-2-phenyl-2-(1,2,4-triazol-1-ylmethyl)butanenitrile	C19H17ClN4	114369-43-6	86138	C1=CC=C(C=C1)C(CCC2=CC=C(C=C2)Cl)(CN3C=NC=N3)C#N	InChI=1S/C19H17ClN4/c20-18-8-6-16(7-9-18)10-11-19(12-21,13-24-15-22-14-23-24)17-4-2-1-3-5-17/h1-9,14-15H,10-11,13H2	336.818	4.23	Positive	M+H	Phenylpropanoids and polyketides	Linear 1,3-diarylpropanoids	Not avaliable	17	19	0	0	4	0	0	1	0	0
188	Erucamide	(Z)-docos-13-enamide	C22H43NO	112-84-5	5365371	CCCCCCCC/C=C\CCCCCCCCCCCC(=O)N	InChI=1S/C22H43NO/c1-2-3-4-5-6-7-8-9-10-11-12-13-14-15-16-17-18-19-20-21-22(23)24/h9-10H,2-8,11-21H2,1H3,(H2,23,24)/b10-9-	337.583	8.44	Positive	M+H	Lipids and lipid-like molecules	Fatty Acyls	Fatty amides	43	22	1	0	1	0	0	0	0	0
189	15-AcDON	[(1R,2R,3S,7R,9R,10R,12S)-3,10-dihydroxy-1,5-dimethyl-4-oxospiro[8-oxatricyclo[7.2.1.02,7]dodec-5-ene-12,2'-oxirane]-2-yl]methyl acetate	C17H22O7	88337-96-6	10382483	CC1=C[C@@H]2[C@]([C@@H](C1=O)O)([C@]3(C[C@H]([C@H]([C@@]34CO4)O2)O)C)COC(=O)C	InChI=1S/C17H22O7/c1-8-4-11-16(6-22-9(2)18,13(21)12(8)20)15(3)5-10(19)14(24-11)17(15)7-23-17/h4,10-11,13-14,19,21H,5-7H2,1-3H3/t10-,11-,13-,14-,15-,16-,17+/m1/s1	338.352	0.3	Positive	M+H	Lipids and lipid-like molecules	Prenol lipids	Sesquiterpenoids	22	17	7	0	0	0	0	0	0	0
190	Piperonyl butoxide	5-[2-(2-butoxyethoxy)ethoxymethyl]-6-propyl-1,3-benzodioxole	C19H30O5	51-03-6	5794	CCCCOCCOCCOCC1=CC2=C(C=C1CCC)OCO2	InChI=1S/C19H30O5/c1-3-5-7-20-8-9-21-10-11-22-14-17-13-19-18(23-15-24-19)12-16(17)6-4-2/h12-13H,3-11,14-15H2,1-2H3	338.438	4.29	Positive	M+NH4	Organoheterocyclic compounds	Benzodioxoles	Not avaliable	30	19	5	0	0	0	0	0	0	0
191	3-Methylphenyl diphenyl phosphate	(3-methylphenyl) diphenyl phosphate	C19H17O4P	69500-28-3	155309	CC1=CC(=CC=C1)OP(=O)(OC2=CC=CC=C2)OC3=CC=CC=C3	InChI=1S/C19H17O4P/c1-16-9-8-14-19(15-16)23-24(20,21-17-10-4-2-5-11-17)22-18-12-6-3-7-13-18/h2-15H,1H3	340.31	5.25	Positive	M+H	Organic acids and derivatives	Organic phosphoric acids and derivatives	Phosphate esters	17	19	4	0	0	0	1	0	0	0
192	Thiophanate-methyl	methyl N-[[2-(methoxycarbonylcarbamothioylamino)phenyl]carbamothioyl]carbamate	C12H14N4O4S2	23564-05-8	3032791	COC(=O)NC(=S)NC1=CC=CC=C1NC(=S)NC(=O)OC	InChI=1S/C12H14N4O4S2/c1-19-11(17)15-9(21)13-7-5-3-4-6-8(7)14-10(22)16-12(18)20-2/h3-6H,1-2H3,(H2,13,15,17,21)(H2,14,16,18,22)	342.394	1.1	Positive	M+H	Benzenoids	Benzene and substituted derivatives	Not avaliable	14	12	4	0	4	2	0	0	0	0
193	Carbophenothion (peak2)	(4-chlorophenyl)sulfanylmethylsulfanyl-diethoxy-sulfanylidene-lambda5-phosphane	C11H16ClO2PS3	786-19-6	13081	CCOP(=S)(OCC)SCSC1=CC=C(C=C1)Cl	InChI=1S/C11H16ClO2PS3/c1-3-13-15(16,14-4-2)18-9-17-11-7-5-10(12)6-8-11/h5-8H,3-4,9H2,1-2H3	342.865	5.44	Positive	M+H	Organosulfur compounds	Thioethers	Aryl thioethers	16	11	2	0	0	3	1	1	0	0
194	Boscalid	2-chloro-N-[2-(4-chlorophenyl)phenyl]pyridine-3-carboxamide	C18H12Cl2N2O	188425-85-6	213013	C1=CC=C(C(=C1)C2=CC=C(C=C2)Cl)NC(=O)C3=C(N=CC=C3)Cl	InChI=1S/C18H12Cl2N2O/c19-13-9-7-12(8-10-13)14-4-1-2-6-16(14)22-18(23)15-5-3-11-21-17(15)20/h1-11H,(H,22,23)	343.207	4	Positive	M+H	Benzenoids	Benzene and substituted derivatives	Anilides	12	18	1	0	2	0	0	2	0	0
195	Oxadiazon	5-tert-butyl-3-(2,4-dichloro-5-propan-2-yloxyphenyl)-1,3,4-oxadiazol-2-one	C15H18Cl2N2O3	19666-30-9	29732	CC(C)OC1=C(C=C(C(=C1)N2C(=O)OC(=N2)C(C)(C)C)Cl)Cl	InChI=1S/C15H18Cl2N2O3/c1-8(2)21-12-7-11(9(16)6-10(12)17)19-14(20)22-13(18-19)15(3,4)5/h6-8H,1-5H3	345.221	4.81	Positive	M+H	Benzenoids	Benzene and substituted derivatives	Halobenzenes	18	15	3	0	2	0	0	2	0	0
196	Isofenphos	propan-2-yl 2-[ethoxy-(propan-2-ylamino)phosphinothioyl]oxybenzoate	C15H24NO4PS	25311-71-1	32872	CCOP(=S)(NC(C)C)OC1=CC=CC=C1C(=O)OC(C)C	InChI=1S/C15H24NO4PS/c1-6-18-21(22,16-11(2)3)20-14-10-8-7-9-13(14)15(17)19-12(4)5/h7-12H,6H2,1-5H3,(H,16,22)	345.394	4.4	Positive	M+H	Benzenoids	Benzene and substituted derivatives	Benzoic acids and derivatives	24	15	4	0	1	1	1	0	0	0
197	Cefalexin	(6R,7R)-7-[[(2R)-2-amino-2-phenylacetyl]amino]-3-methyl-8-oxo-5-thia-1-azabicyclo[4.2.0]oct-2-ene-2-carboxylic acid	C16H17N3O4S	15686-71-2	27447	CC1=C(N2[C@@H]([C@@H](C2=O)NC(=O)[C@@H](C3=CC=CC=C3)N)SC1)C(=O)O	InChI=1S/C16H17N3O4S/c1-8-7-24-15-11(14(21)19(15)12(8)16(22)23)18-13(20)10(17)9-5-3-2-4-6-9/h2-6,10-11,15H,7,17H2,1H3,(H,18,20)(H,22,23)/t10-,11-,15-/m1/s1	347.389	0.4	Positive	M+H	Organoheterocyclic compounds	Lactams	Beta lactams	17	16	4	0	3	1	0	0	0	0
198	Cefradine	(6R,7R)-7-[[(2R)-2-amino-2-cyclohexa-1,4-dien-1-ylacetyl]amino]-3-methyl-8-oxo-5-thia-1-azabicyclo[4.2.0]oct-2-ene-2-carboxylic acid	C16H19N3O4S	38821-53-3	38103	CC1=C(N2[C@@H]([C@@H](C2=O)NC(=O)[C@@H](C3=CCC=CC3)N)SC1)C(=O)O	InChI=1S/C16H19N3O4S/c1-8-7-24-15-11(14(21)19(15)12(8)16(22)23)18-13(20)10(17)9-5-3-2-4-6-9/h2-3,6,10-11,15H,4-5,7,17H2,1H3,(H,18,20)(H,22,23)/t10-,11-,15-/m1/s1	349.405	0.41	Positive	M+H	Organic acids and derivatives	Carboxylic acids and derivatives	Amino acids, peptides, and analogues	19	16	4	0	3	1	0	0	0	0
199	PFPeS	1,1,2,2,3,3,4,4,5,5,5-undecafluoropentane-1-sulfonic acid	C5HF11O3S	2706-91-4	75922	C(C(C(F)(F)F)(F)F)(C(C(F)(F)S(=O)(=O)O)(F)F)(F)F	InChI=1S/C5HF11O3S/c6-1(7,2(8,9)4(12,13)14)3(10,11)5(15,16)20(17,18)19/h(H,17,18,19)	350.11	2.49	Negative	M-H	Organohalogen compounds	Alkyl halides	Alkyl fluorides	1	5	3	11	0	1	0	0	0	0
200	Lomefloxacin	1-ethyl-6,8-difluoro-7-(3-methylpiperazin-1-yl)-4-oxoquinoline-3-carboxylic acid	C17H19F2N3O3	98079-51-7	3948	CCN1C=C(C(=O)C2=CC(=C(C(=C21)F)N3CCNC(C3)C)F)C(=O)O	InChI=1S/C17H19F2N3O3/c1-3-21-8-11(17(24)25)16(23)10-6-12(18)15(13(19)14(10)21)22-5-4-20-9(2)7-22/h6,8-9,20H,3-5,7H2,1-2H3,(H,24,25)	351.348	0.31	Positive	M+H	Organoheterocyclic compounds	Quinolines and derivatives	Quinoline carboxylic acids	19	17	3	2	3	0	0	0	0	0
201	AltertoxinⅠ	(12S,12aS,12bR)-4,9,12,12b-tetrahydroxy-2,11,12,12a-tetrahydro-1H-perylene-3,10-dione	C20H16O6	56258-32-3	104860	C1C[C@]2([C@@H]3[C@H](CC(=O)C4=C(C=CC(=C34)C5=C2C(=C(C=C5)O)C1=O)O)O)O	InChI=1S/C20H16O6/c21-10-3-1-8-9-2-4-11(22)17-12(23)5-6-20(26,18(9)17)19-14(25)7-13(24)16(10)15(8)19/h1-4,14,19,21-22,25-26H,5-7H2/t14-,19+,20-/m0/s1	352.337	1.64	Negative	M-H	Benzenoids	Perylenequinones	Not avaliable	16	20	6	0	0	0	0	0	0	0
202	Piperophos	2-dipropoxyphosphinothioylsulfanyl-1-(2-methylpiperidin-1-yl)ethanone	C14H28NO3PS2	24151-93-7	32230	CCCOP(=S)(OCCC)SCC(=O)N1CCCCC1C	InChI=1S/C14H28NO3PS2/c1-4-10-17-19(20,18-11-5-2)21-12-14(16)15-9-7-6-8-13(15)3/h13H,4-12H2,1-3H3	353.481	4.23	Positive	M+H	Organoheterocyclic compounds	Piperidines	N-acylpiperidines	28	14	3	0	1	2	1	0	0	0
203	Fusarenon-X	[(1S,2R,3S,7R,9R,10R,11S,12S)-3,10-dihydroxy-2-(hydroxymethyl)-1,5-dimethyl-4-oxospiro[8-oxatricyclo[7.2.1.02,7]dodec-5-ene-12,2'-oxirane]-11-yl] acetate	C17H22O8	23255-69-8	304599	CC1=C[C@@H]2[C@]([C@@H](C1=O)O)([C@]3([C@@H]([C@H]([C@H]([C@@]34CO4)O2)O)OC(=O)C)C)CO	InChI=1S/C17H22O8/c1-7-4-9-16(5-18,12(22)10(7)20)15(3)13(24-8(2)19)11(21)14(25-9)17(15)6-23-17/h4,9,11-14,18,21-22H,5-6H2,1-3H3/t9-,11-,12-,13-,14-,15-,16-,17+/m1/s1	354.4	-1.24	Positive	M+Na	Lipids and lipid-like molecules	Prenol lipids	Sesquiterpenoids	22	17	8	0	0	0	0	0	0	0
204	Thiamphenicol	2,2-dichloro-N-[(1R,2R)-1,3-dihydroxy-1-(4-methylsulfonylphenyl)propan-2-yl]acetamide	C12H15Cl2NO5S	15318-45-3	27200	CS(=O)(=O)C1=CC=C(C=C1)[C@H]([C@@H](CO)NC(=O)C(Cl)Cl)O	InChI=1S/C12H15Cl2NO5S/c1-21(19,20)8-4-2-7(3-5-8)10(17)9(6-16)15-12(18)11(13)14/h2-5,9-11,16-17H,6H2,1H3,(H,15,18)/t9-,10-/m1/s1	356.222	-0.33	Negative	M-H	Benzenoids	Benzene and substituted derivatives	Benzenesulfonyl compounds	15	12	5	0	1	1	0	2	0	0
205	Danofloxacin	1-cyclopropyl-6-fluoro-7-[(1S,4S)-5-methyl-2,5-diazabicyclo[2.2.1]heptan-2-yl]-4-oxoquinoline-3-carboxylic acid	C19H20FN3O3	112398-08-0	71335	CN1C[C@@H]2C[C@H]1CN2C3=C(C=C4C(=C3)N(C=C(C4=O)C(=O)O)C5CC5)F	InChI=1S/C19H20FN3O3/c1-21-7-12-4-11(21)8-22(12)17-6-16-13(5-15(17)20)18(24)14(19(25)26)9-23(16)10-2-3-10/h5-6,9-12H,2-4,7-8H2,1H3,(H,25,26)/t11-,12-/m0/s1	357.379	0.44	Positive	M+H	Organoheterocyclic compounds	Quinolines and derivatives	Quinoline carboxylic acids	20	19	3	1	3	0	0	0	0	0
206	Florfenicol	2,2-dichloro-N-[(1R,2S)-3-fluoro-1-hydroxy-1-(4-methylsulfonylphenyl)propan-2-yl]acetamide	C12H14Cl2FNO4S	73231-34-2	114811	CS(=O)(=O)C1=CC=C(C=C1)[C@H]([C@@H](CF)NC(=O)C(Cl)Cl)O	InChI=1S/C12H14Cl2FNO4S/c1-21(19,20)8-4-2-7(3-5-8)10(17)9(6-15)16-12(18)11(13)14/h2-5,9-11,17H,6H2,1H3,(H,16,18)/t9-,10-/m1/s1	358.213	-0.04	Negative	M-H	Benzenoids	Benzene and substituted derivatives	Benzenesulfonyl compounds	14	12	4	1	1	1	0	2	0	0
207	Enrofloxacin	1-cyclopropyl-7-(4-ethylpiperazin-1-yl)-6-fluoro-4-oxoquinoline-3-carboxylic acid	C19H22FN3O3	93106-60-6	71188	CCN1CCN(CC1)C2=C(C=C3C(=C2)N(C=C(C3=O)C(=O)O)C4CC4)F	InChI=1S/C19H22FN3O3/c1-2-21-5-7-22(8-6-21)17-10-16-13(9-15(17)20)18(24)14(19(25)26)11-23(16)12-3-4-12/h9-12H,2-8H2,1H3,(H,25,26)	359.395	0.7	Positive	M+H	Organoheterocyclic compounds	Quinolines and derivatives	Quinoline carboxylic acids	22	19	3	1	3	0	0	0	0	0
208	Chlorthiophos	(2,5-dichloro-4-methylsulfanylphenoxy)-diethoxy-sulfanylidene-lambda5-phosphane	C11H15Cl2O3PS2	60238-56-4	30859	CCOP(=S)(OCC)OC1=CC(=C(C=C1Cl)SC)Cl	InChI=1S/C11H15Cl2O3PS2/c1-4-14-17(18,15-5-2)16-10-6-9(13)11(19-3)7-8(10)12/h6-7H,4-5H2,1-3H3	361.245	5.8	Positive	M+H	Organic acids and derivatives	Organic thiophosphoric acids and derivatives	Thiophosphoric acid esters	15	11	3	0	0	2	1	2	0	0
209	Ofloxacin	7-fluoro-2-methyl-6-(4-methylpiperazin-1-yl)-10-oxo-4-oxa-1-azatricyclo[7.3.1.05,13]trideca-5(13),6,8,11-tetraene-11-carboxylic acid	C18H20FN3O4	82419-36-1;	4583	CC1COC2=C3N1C=C(C(=O)C3=CC(=C2N4CCN(CC4)C)F)C(=O)O	InChI=1S/C18H20FN3O4/c1-10-9-26-17-14-11(16(23)12(18(24)25)8-22(10)14)7-13(19)15(17)21-5-3-20(2)4-6-21/h7-8,10H,3-6,9H2,1-2H3,(H,24,25)	361.368	-0.2	Positive	M+H	Organoheterocyclic compounds	Quinolines and derivatives	Quinoline carboxylic acids	20	18	4	1	3	0	0	0	0	0
210	Oxyfluorfen	2-chloro-1-(3-ethoxy-4-nitrophenoxy)-4-(trifluoromethyl)benzene	C15H11ClF3NO4	42874-03-3	39327	CCOC1=C(C=CC(=C1)OC2=C(C=C(C=C2)C(F)(F)F)Cl)[N+](=O)[O-]	InChI=1S/C15H11ClF3NO4/c1-2-23-14-8-10(4-5-12(14)20(21)22)24-13-6-3-9(7-11(13)16)15(17,18)19/h3-8H,2H2,1H3	361.7	5.21	Positive	M+H	Benzenoids	Benzene and substituted derivatives	Diphenylethers	11	15	4	3	1	0	0	1	0	0
211	Bezafibrate	2-[4-[2-[(4-chlorobenzoyl)amino]ethyl]phenoxy]-2-methylpropanoic acid	C19H20ClNO4	41859-67-0	39042	CC(C)(C(=O)O)OC1=CC=C(C=C1)CCNC(=O)C2=CC=C(C=C2)Cl	InChI=1S/C19H20ClNO4/c1-19(2,18(23)24)25-16-9-3-13(4-10-16)11-12-21-17(22)14-5-7-15(20)8-6-14/h3-10H,11-12H2,1-2H3,(H,21,22)(H,23,24)	361.819	4.25	Positive	M+H	Benzenoids	Benzene and substituted derivatives	Phenoxyacetic acid derivatives	20	19	4	0	1	0	0	1	0	0
212	2-Ethylhexyl diphenyl phosphate	2-ethylhexyl diphenyl phosphate	C20H27O4P	1241-94-7	14716	CCCCC(CC)COP(=O)(OC1=CC=CC=C1)OC2=CC=CC=C2	InChI=1S/C20H27O4P/c1-3-5-12-18(4-2)17-22-25(21,23-19-13-8-6-9-14-19)24-20-15-10-7-11-16-20/h6-11,13-16,18H,3-5,12,17H2,1-2H3	362.4	6.3	Positive	M+H	Organic acids and derivatives	Organic phosphoric acids and derivatives	Phosphate esters	27	20	4	0	0	0	1	0	0	0
213	Hydrocorticosterone	(8S,9S,10R,11S,13S,14S,17R)-11,17-dihydroxy-17-(2-hydroxyacetyl)-10,13-dimethyl-2,6,7,8,9,11,12,14,15,16-decahydro-1H-cyclopenta[a]phenanthren-3-one	C21H30O5	50-23-7	5754	C[C@]12CCC(=O)C=C1CC[C@@H]3[C@@H]2[C@H](C[C@]4([C@H]3CC[C@@]4(C(=O)CO)O)C)O	InChI=1S/C21H30O5/c1-19-7-5-13(23)9-12(19)3-4-14-15-6-8-21(26,17(25)11-22)20(15,2)10-16(24)18(14)19/h9,14-16,18,22,24,26H,3-8,10-11H2,1-2H3/t14-,15-,16-,18+,19-,20-,21-/m0/s1	362.46	1.62	Positive	M+H	Lipids and lipid-like molecules	Steroids and steroid derivatives	Hydroxysteroids	30	21	5	0	0	0	0	0	0	0
214	Perfluoroheptanoic acid	2,2,3,3,4,4,5,5,6,6,7,7,7-tridecafluoroheptanoic acid	C7HF13O2	375-85-9	67818	C(=O)(C(C(C(C(C(C(F)(F)F)(F)F)(F)F)(F)F)(F)F)(F)F)O	InChI=1S/C7HF13O2/c8-2(9,1(21)22)3(10,11)4(12,13)5(14,15)6(16,17)7(18,19)20/h(H,21,22)	364.061	4.15	Negative	M-H	Organohalogen compounds	Alkyl halides	Alkyl fluorides	1	7	2	13	0	0	0	0	0	0
215	Pyridaben	2-tert-butyl-5-[(4-tert-butylphenyl)methylsulfanyl]-4-chloropyridazin-3-one	C19H25ClN2OS	96489-71-3	91754	CC(C)(C)C1=CC=C(C=C1)CSC2=C(C(=O)N(N=C2)C(C)(C)C)Cl	InChI=1S/C19H25ClN2OS/c1-18(2,3)14-9-7-13(8-10-14)12-24-15-11-21-22(19(4,5)6)17(23)16(15)20/h7-11H,12H2,1-6H3	364.933	5.47	Positive	M+H	Benzenoids	Benzene and substituted derivatives	Phenylpropanes	25	19	1	0	2	1	0	1	0	0
216	Diacetoxyscirpenol	[(1S,2R,7R,9R,10R,11S,12R)-11-acetyloxy-10-hydroxy-1,5-dimethylspiro[8-oxatricyclo[7.2.1.02,7]dodec-5-ene-12,2'-oxirane]-2-yl]methyl acetate	C19H26O7	2270-40-8	91518	CC1=C[C@@H]2[C@](CC1)([C@]3([C@@H]([C@H]([C@H]([C@]34CO4)O2)O)OC(=O)C)C)COC(=O)C	InChI=1S/C19H26O7/c1-10-5-6-18(8-23-11(2)20)13(7-10)26-16-14(22)15(25-12(3)21)17(18,4)19(16)9-24-19/h7,13-16,22H,5-6,8-9H2,1-4H3/t13-,14-,15-,16-,17-,18-,19-/m1/s1	366.406	1.4	Positive	M+NH4	Lipids and lipid-like molecules	Prenol lipids	Sesquiterpenoids	26	19	7	0	0	0	0	0	0	0
217	Anilofos	N-(4-chlorophenyl)-2-dimethoxyphosphinothioylsulfanyl-N-propan-2-ylacetamide	C13H19ClNO3PS2	64249-01-0	91687	CC(C)N(C1=CC=C(C=C1)Cl)C(=O)CSP(=S)(OC)OC	InChI=1S/C13H19ClNO3PS2/c1-10(2)15(12-7-5-11(14)6-8-12)13(16)9-21-19(20,17-3)18-4/h5-8,10H,9H2,1-4H3	367.852	3.89	Positive	M+H	Benzenoids	Benzene and substituted derivatives	Anilides	19	13	3	0	1	2	1	1	0	0
218	Tris(4-methylphenyl) phosphate	tris(4-methylphenyl) phosphate	C21H21O4P	78-32-0	6529	CC1=CC=C(C=C1)OP(=O)(OC2=CC=C(C=C2)C)OC3=CC=C(C=C3)C	InChI=1S/C21H21O4P/c1-16-4-10-19(11-5-16)23-26(22,24-20-12-6-17(2)7-13-20)25-21-14-8-18(3)9-15-21/h4-15H,1-3H3	368.363	6.34	Positive	M+H	Organic acids and derivatives	Organic phosphoric acids and derivatives	Phosphate esters	21	21	4	0	0	0	1	0	0	0
219	Fleroxacin	6,8-difluoro-1-(2-fluoroethyl)-7-(4-methylpiperazin-1-yl)-4-oxoquinoline-3-carboxylic acid	C17H18F3N3O3	79660-72-3	3357	CN1CCN(CC1)C2=C(C=C3C(=C2F)N(C=C(C3=O)C(=O)O)CCF)F	InChI=1S/C17H18F3N3O3/c1-21-4-6-22(7-5-21)15-12(19)8-10-14(13(15)20)23(3-2-18)9-11(16(10)24)17(25)26/h8-9H,2-7H2,1H3,(H,25,26)	369.338	0.05	Positive	M+H	Organoheterocyclic compounds	Quinolines and derivatives	Quinoline carboxylic acids	18	17	3	3	3	0	0	0	0	0
220	Ochratoxin B	(2S)-2-[[(3R)-8-hydroxy-3-methyl-1-oxo-3,4-dihydroisochromene-7-carbonyl]amino]-3-phenylpropanoic acid	C20H19NO6	4825-86-9	20966	C[C@@H]1CC2=C(C(=C(C=C2)C(=O)N[C@@H](CC3=CC=CC=C3)C(=O)O)O)C(=O)O1	InChI=1S/C20H19NO6/c1-11-9-13-7-8-14(17(22)16(13)20(26)27-11)18(23)21-15(19(24)25)10-12-5-3-2-4-6-12/h2-8,11,15,22H,9-10H2,1H3,(H,21,23)(H,24,25)/t11-,15+/m1/s1	369.368	3.77	Positive	M+H	Phenylpropanoids and polyketides	Ochratoxins and related substances	Not avaliable	19	20	6	0	1	0	0	0	0	0
221	Bis(2-ethylhexyl) adipate	bis(2-ethylhexyl) hexanedioate	C22H42O4	103-23-1	7641	CCCCC(CC)COC(=O)CCCCC(=O)OCC(CC)CCCC	InChI=1S/C22H42O4/c1-5-9-13-19(7-3)17-25-21(23)15-11-12-16-22(24)26-18-20(8-4)14-10-6-2/h19-20H,5-18H2,1-4H3	370.567	8.12	Positive	M+H	Lipids and lipid-like molecules	Fatty Acyls	Fatty acid esters	42	22	4	0	0	0	0	0	0	0
222	Pyrazophos	ethyl 2-diethoxyphosphinothioyloxy-5-methylpyrazolo[1,5-a]pyrimidine-6-carboxylate	C14H20N3O5PS	13457-18-6	26033	CCOC(=O)C1=CN2C(=CC(=N2)OP(=S)(OCC)OCC)N=C1C	InChI=1S/C14H20N3O5PS/c1-5-19-14(18)11-9-17-12(15-10(11)4)8-13(16-17)22-23(24,20-6-2)21-7-3/h8-9H,5-7H2,1-4H3	373.365	3.8	Positive	M+H	Organic acids and derivatives	Organic thiophosphoric acids and derivatives	Thiophosphoric acid esters	20	14	5	0	3	1	1	0	0	0
223	Etofenprox	1-ethoxy-4-[2-methyl-1-[(3-phenoxyphenyl)methoxy]propan-2-yl]benzene	C25H28O3	80844-07-1	71245	CCOC1=CC=C(C=C1)C(C)(C)COCC2=CC(=CC=C2)OC3=CC=CC=C3	InChI=1S/C25H28O3/c1-4-27-22-15-13-21(14-16-22)25(2,3)19-26-18-20-9-8-12-24(17-20)28-23-10-6-5-7-11-23/h5-17H,4,18-19H2,1-3H3	376.488	7.47	Positive	M+NH4	Benzenoids	Benzene and substituted derivatives	Diphenylethers	28	25	3	0	0	0	0	0	0	0
224	NaDONA	2,2,3-trifluoro-3-[1,1,2,2,3,3-hexafluoro-3-(trifluoromethoxy)propoxy]propanoic acid	C7H2F12O4	919005-14-4	52915299	C(C(C(=O)O)(F)F)(OC(C(C(OC(F)(F)F)(F)F)(F)F)(F)F)F	InChI=1S/C7H2F12O4/c8-1(3(9,10)2(20)21)22-5(13,14)4(11,12)6(15,16)23-7(17,18)19/h1H,(H,20,21)	378.07	3.56	Negative	M-H	Organic acids and derivatives	Carboxylic acids and derivatives	Alpha-halocarboxylic acids and derivatives	2	7	4	12	0	0	0	0	0	0
225	Neosolaniol	[(1S,2R,4S,7R,9R,10R,11S,12S)-11-acetyloxy-4,10-dihydroxy-1,5-dimethylspiro[8-oxatricyclo[7.2.1.02,7]dodec-5-ene-12,2'-oxirane]-2-yl]methyl acetate	C19H26O8	36519-25-2	13818797	CC1=C[C@@H]2[C@](C[C@@H]1O)([C@]3([C@@H]([C@H]([C@H]([C@@]34CO4)O2)O)OC(=O)C)C)COC(=O)C	InChI=1S/C19H26O8/c1-9-5-13-18(6-12(9)22,7-24-10(2)20)17(4)15(26-11(3)21)14(23)16(27-13)19(17)8-25-19/h5,12-16,22-23H,6-8H2,1-4H3/t12-,13+,14+,15+,16+,17+,18+,19-/m0/s1	382.405	0.27	Positive	M+Na	Lipids and lipid-like molecules	Prenol lipids	Sesquiterpenoids	26	19	8	0	0	0	0	0	0	0
226	Furathiocarb	(2,2-dimethyl-3H-1-benzofuran-7-yl) N-[butoxycarbonyl(methyl)amino]sulfanyl-N-methylcarbamate	C18H26N2O5S	65907-30-4	47759	CCCCOC(=O)N(C)SN(C)C(=O)OC1=CC=CC2=C1OC(C2)(C)C	InChI=1S/C18H26N2O5S/c1-6-7-11-23-16(21)19(4)26-20(5)17(22)24-14-10-8-9-13-12-18(2,3)25-15(13)14/h8-10H,6-7,11-12H2,1-5H3	382.5	4.43	Positive	M+H	Organoheterocyclic compounds	Coumarans	Not avaliable	26	18	5	0	2	1	0	0	0	0
227	Sarafloxacin	6-fluoro-1-(4-fluorophenyl)-4-oxo-7-piperazin-1-ylquinoline-3-carboxylic acid	C20H17F2N3O3	98105-99-8	56208	C1CN(CCN1)C2=C(C=C3C(=C2)N(C=C(C3=O)C(=O)O)C4=CC=C(C=C4)F)F	InChI=1S/C20H17F2N3O3/c21-12-1-3-13(4-2-12)25-11-15(20(27)28)19(26)14-9-16(22)18(10-17(14)25)24-7-5-23-6-8-24/h1-4,9-11,23H,5-8H2,(H,27,28)	385.364	1.07	Positive	M+H	Organoheterocyclic compounds	Quinolines and derivatives	Phenylquinolines	17	20	3	2	3	0	0	0	0	0
228	Roquefortine C	(1S,4E,7S,9R)-4-(1H-imidazol-5-ylmethylidene)-9-(2-methylbut-3-en-2-yl)-2,5,16-triazatetracyclo[7.7.0.02,7.010,15]hexadeca-10,12,14-triene-3,6-dione	C22H23N5O2	58735-64-1	21608802	CC(C)(C=C)[C@@]12C[C@H]3C(=O)N/C(=C/C4=CN=CN4)/C(=O)N3[C@@H]1NC5=CC=CC=C25	InChI=1S/C22H23N5O2/c1-4-21(2,3)22-10-17-18(28)25-16(9-13-11-23-12-24-13)19(29)27(17)20(22)26-15-8-6-5-7-14(15)22/h4-9,11-12,17,20,26H,1,10H2,2-3H3,(H,23,24)(H,25,28)/b16-9+/t17-,20-,22+/m0/s1	389.45	1.45	Positive	M+H	Organoheterocyclic compounds	Indoles and derivatives	Pyrroloindoles	23	22	2	0	5	0	0	0	0	0
229	8-Methylnonyl diphenyl phosphate	8-methylnonyl diphenyl phosphate	C22H31O4P	29761-21-5	34697	CC(C)CCCCCCCOP(=O)(OC1=CC=CC=C1)OC2=CC=CC=C2	InChI=1S/C22H31O4P/c1-20(2)14-8-4-3-5-13-19-24-27(23,25-21-15-9-6-10-16-21)26-22-17-11-7-12-18-22/h6-7,9-12,15-18,20H,3-5,8,13-14,19H2,1-2H3	390.453	7.28	Positive	M+H	Organic acids and derivatives	Organic phosphoric acids and derivatives	Phosphate esters	31	22	4	0	0	0	1	0	0	0
230	DNOP	dioctyl benzene-1,2-dicarboxylate	C24H38O4	117-84-0	8346	CCCCCCCCOC(=O)C1=CC=CC=C1C(=O)OCCCCCCCC	InChI=1S/C24H38O4/c1-3-5-7-9-11-15-19-27-23(25)21-17-13-14-18-22(21)24(26)28-20-16-12-10-8-6-4-2/h13-14,17-18H,3-12,15-16,19-20H2,1-2H3	390.556	8.54	Positive	M+H	Benzenoids	Benzene and substituted derivatives	Benzoic acids and derivatives	38	24	4	0	0	0	0	0	0	0
231	Permethrin (peak2)	(3-phenoxyphenyl)methyl 3-(2,2-dichloroethenyl)-2,2-dimethylcyclopropane-1-carboxylate	C21H20Cl2O3	52645-53-1	40326	CC1(C(C1C(=O)OCC2=CC(=CC=C2)OC3=CC=CC=C3)C=C(Cl)Cl)C	InChI=1S/C21H20Cl2O3/c1-21(2)17(12-18(22)23)19(21)20(24)25-13-14-7-6-10-16(11-14)26-15-8-4-3-5-9-15/h3-12,17,19H,13H2,1-2H3	391.288	7.43	Positive	M+NH4	Lipids and lipid-like molecules	Fatty Acyls	Fatty acid esters	20	21	3	0	0	0	0	2	0	0
232	Sparfloxacin	5-amino-1-cyclopropyl-7-[(3R,5S)-3,5-dimethylpiperazin-1-yl]-6,8-difluoro-4-oxoquinoline-3-carboxylic acid	C19H22F2N4O3	110871-86-8	60464	C[C@@H]1CN(C[C@@H](N1)C)C2=C(C(=C3C(=C2F)N(C=C(C3=O)C(=O)O)C4CC4)N)F	InChI=1S/C19H22F2N4O3/c1-8-5-24(6-9(2)23-8)17-13(20)15(22)12-16(14(17)21)25(10-3-4-10)7-11(18(12)26)19(27)28/h7-10,23H,3-6,22H2,1-2H3,(H,27,28)/t8-,9+	392.4	0.12	Positive	M+H	Organoheterocyclic compounds	Quinolines and derivatives	Quinoline carboxylic acids	22	19	3	2	4	0	0	0	0	0
233	Dexamethasone	(8S,9R,10S,11S,13S,14S,16R,17R)-9-fluoro-11,17-dihydroxy-17-(2-hydroxyacetyl)-10,13,16-trimethyl-6,7,8,11,12,14,15,16-octahydrocyclopenta[a]phenanthren-3-one	C22H29FO5	50-02-2	5743	C[C@@H]1C[C@H]2[C@@H]3CCC4=CC(=O)C=C[C@@]4([C@]3([C@H](C[C@@]2([C@]1(C(=O)CO)O)C)O)F)C	InChI=1S/C22H29FO5/c1-12-8-16-15-5-4-13-9-14(25)6-7-19(13,2)21(15,23)17(26)10-20(16,3)22(12,28)18(27)11-24/h6-7,9,12,15-17,24,26,28H,4-5,8,10-11H2,1-3H3/t12-,15+,16+,17+,19+,20+,21+,22+/m1/s1	392.461	1.72	Positive	M+H	Lipids and lipid-like molecules	Steroids and steroid derivatives	Hydroxysteroids	29	22	5	1	0	0	0	0	0	0
234	Ergocalciferol	3-[2-[1-(5,6-dimethylhept-3-en-2-yl)-7a-methyl-2,3,3a,5,6,7-hexahydro-1H-inden-4-ylidene]ethylidene]-4-methylidenecyclohexan-1-ol	C28H44O	50-14-6	3249	CC(C)C(C)C=CC(C)C1CCC2C1(CCCC2=CC=C3CC(CCC3=C)O)C	InChI=1S/C28H44O/c1-19(2)20(3)9-10-22(5)26-15-16-27-23(8-7-17-28(26,27)6)12-13-24-18-25(29)14-11-21(24)4/h9-10,12-13,19-20,22,25-27,29H,4,7-8,11,14-18H2,1-3,5-6H3	396.6	10.44	Positive	M+H	Lipids and lipid-like molecules	Steroids and steroid derivatives	Vitamin D and derivatives	44	28	1	0	0	0	0	0	0	0
235	Sucralose	(2R,3R,4R,5R,6R)-2-[(2R,3S,4S,5S)-2,5-bis(chloromethyl)-3,4-dihydroxyoxolan-2-yl]oxy-5-chloro-6-(hydroxymethyl)oxane-3,4-diol	C12H19Cl3O8	56038-13-2	71485	C([C@@H]1[C@@H]([C@@H]([C@H]([C@H](O1)O[C@]2([C@H]([C@@H]([C@H](O2)CCl)O)O)CCl)O)O)Cl)O	InChI=1S/C12H19Cl3O8/c13-1-4-7(17)10(20)12(3-14,22-4)23-11-9(19)8(18)6(15)5(2-16)21-11/h4-11,16-20H,1-3H2/t4-,5-,6+,7-,8+,9-,10+,11-,12+/m1/s1	397.634	-1	Negative	M+HCO2	Organic oxygen compounds	Organooxygen compounds	Carbohydrates and carbohydrate conjugates	19	12	8	0	0	0	0	3	0	0
236	Tris(2-butoxyethyl) phosphate	tris(2-butoxyethyl) phosphate	C18H39O7P	78-51-3	6540	CCCCOCCOP(=O)(OCCOCCCC)OCCOCCCC	InChI=1S/C18H39O7P/c1-4-7-10-20-13-16-23-26(19,24-17-14-21-11-8-5-2)25-18-15-22-12-9-6-3/h4-18H2,1-3H3	398.472	3	Positive	M+H	Organic acids and derivatives	Organic phosphoric acids and derivatives	Phosphate esters	39	18	7	0	0	0	1	0	0	0
237	FHxSA	1,1,2,2,3,3,4,4,5,5,6,6,6-tridecafluorohexane-1-sulfonamide	C6H2F13NO2S	41997-13-1	11603678	C(C(C(C(F)(F)S(=O)(=O)N)(F)F)(F)F)(C(C(F)(F)F)(F)F)(F)F	InChI=1S/C6H2F13NO2S/c7-1(8,3(11,12)5(15,16)17)2(9,10)4(13,14)6(18,19)23(20,21)22/h(H2,20,21,22)	399.13	4.46	Negative	M-H	Organohalogen compounds	Alkyl halides	Alkyl fluorides	2	6	2	13	1	1	0	0	0	0
238	Difloxacin	6-fluoro-1-(4-fluorophenyl)-7-(4-methylpiperazin-1-yl)-4-oxoquinoline-3-carboxylic acid	C21H19F2N3O3	98106-17-3	56206	CN1CCN(CC1)C2=C(C=C3C(=C2)N(C=C(C3=O)C(=O)O)C4=CC=C(C=C4)F)F	InChI=1S/C21H19F2N3O3/c1-24-6-8-25(9-7-24)19-11-18-15(10-17(19)23)20(27)16(21(28)29)12-26(18)14-4-2-13(22)3-5-14/h2-5,10-12H,6-9H2,1H3,(H,28,29)	399.391	1.28	Positive	M+H	Organoheterocyclic compounds	Quinolines and derivatives	Phenylquinolines	19	21	3	2	3	0	0	0	0	0
239	Perfluorohexanesulfonic acid	1,1,2,2,3,3,4,4,5,5,6,6,6-tridecafluorohexane-1-sulfonic acid	C6HF13O3S	355-46-4	67734	C(C(C(C(F)(F)S(=O)(=O)O)(F)F)(F)F)(C(C(F)(F)F)(F)F)(F)F	InChI=1S/C6HF13O3S/c7-1(8,3(11,12)5(15,16)17)2(9,10)4(13,14)6(18,19)23(20,21)22/h(H,20,21,22)	400.115	3.16	Negative	M-H	Organohalogen compounds	Alkyl halides	Alkyl fluorides	1	6	3	13	0	1	0	0	0	0
240	Moxifloxacin	7-[(4aS,7aS)-1,2,3,4,4a,5,7,7a-octahydropyrrolo[3,4-b]pyridin-6-yl]-1-cyclopropyl-6-fluoro-8-methoxy-4-oxoquinoline-3-carboxylic acid	C21H24FN3O4	151096-09-2	152946	COC1=C2C(=CC(=C1N3C[C@@H]4CCCN[C@@H]4C3)F)C(=O)C(=CN2C5CC5)C(=O)O	InChI=1S/C21H24FN3O4/c1-29-20-17-13(19(26)14(21(27)28)9-25(17)12-4-5-12)7-15(22)18(20)24-8-11-3-2-6-23-16(11)10-24/h7,9,11-12,16,23H,2-6,8,10H2,1H3,(H,27,28)/t11-,16+/m0/s1	401.431	0.95	Positive	M+H	Organoheterocyclic compounds	Quinolines and derivatives	Quinoline carboxylic acids	24	21	4	1	3	0	0	0	0	0
241	Oxacillin	(2S,5R,6R)-3,3-dimethyl-6-[(5-methyl-3-phenyl-1,2-oxazole-4-carbonyl)amino]-7-oxo-4-thia-1-azabicyclo[3.2.0]heptane-2-carboxylic acid	C19H19N3O5S	66-79-5	6196	CC1=C(C(=NO1)C2=CC=CC=C2)C(=O)N[C@H]3[C@@H]4N(C3=O)[C@H](C(S4)(C)C)C(=O)O	InChI=1S/C19H19N3O5S/c1-9-11(12(21-27-9)10-7-5-4-6-8-10)15(23)20-13-16(24)22-14(18(25)26)19(2,3)28-17(13)22/h4-8,13-14,17H,1-3H3,(H,20,23)(H,25,26)/t13-,14+,17-/m1/s1	401.436	2.57	Positive	M+H	Organic acids and derivatives	Carboxylic acids and derivatives	Amino acids, peptides, and analogues	19	19	5	0	3	1	0	0	0	0
242	(-)-Citreoviridin	6-[(1E,3E,5E,7E)-8-[(2S,3R,4R,5R)-3,4-dihydroxy-2,4,5-trimethyloxolan-2-yl]-7-methylocta-1,3,5,7-tetraenyl]-4-methoxy-5-methylpyran-2-one	C23H30O6	74145-79-2	6436023	C[C@@H]1[C@]([C@H]([C@](O1)(C)/C=C(\C)/C=C/C=C/C=C/C2=C(C(=CC(=O)O2)OC)C)O)(C)O	InChI=1S/C23H30O6/c1-15(14-22(4)21(25)23(5,26)17(3)29-22)11-9-7-8-10-12-18-16(2)19(27-6)13-20(24)28-18/h7-14,17,21,25-26H,1-6H3/b8-7+,11-9+,12-10+,15-14+/t17-,21+,22+,23+/m1/s1	402.481	2.99	Positive	M+H	Organoheterocyclic compounds	Pyrans	Pyranones and derivatives	30	23	6	0	0	0	0	0	0	0
243	Ochratoxin A	(2S)-2-[[(3R)-5-chloro-8-hydroxy-3-methyl-1-oxo-3,4-dihydroisochromene-7-carbonyl]amino]-3-phenylpropanoic acid	C20H18ClNO6	303-47-9	442530	C[C@@H]1CC2=C(C=C(C(=C2C(=O)O1)O)C(=O)N[C@@H](CC3=CC=CC=C3)C(=O)O)Cl	InChI=1S/C20H18ClNO6/c1-10-7-12-14(21)9-13(17(23)16(12)20(27)28-10)18(24)22-15(19(25)26)8-11-5-3-2-4-6-11/h2-6,9-10,15,23H,7-8H2,1H3,(H,22,24)(H,25,26)/t10-,15+/m1/s1	403.813	4.41	Positive	M+H	Phenylpropanoids and polyketides	Ochratoxins and related substances	Not avaliable	18	20	6	0	1	0	0	1	0	0
244	Bromfenvinfos	[(E)-2-bromo-1-(2,4-dichlorophenyl)ethenyl] diethyl phosphate	C12H14BrCl2O4P	118413-12-0	6108489	CCOP(=O)(OCC)O/C(=C/Br)/C1=C(C=C(C=C1)Cl)Cl	InChI=1S/C12H14BrCl2O4P/c1-3-17-20(16,18-4-2)19-12(8-13)10-6-5-9(14)7-11(10)15/h5-8H,3-4H2,1-2H3/b12-8+	404.021	4.05	Positive	M+H	Benzenoids	Benzene and substituted derivatives	Halobenzenes	14	12	4	0	0	0	1	2	1	0
245	Toremifene	2-[4-[(Z)-4-chloro-1,2-diphenylbut-1-enyl]phenoxy]-N,N-dimethylethanamine	C26H28ClNO	89778-26-7	3005573	CN(C)CCOC1=CC=C(C=C1)/C(=C(/CCCl)\C2=CC=CC=C2)/C3=CC=CC=C3	InChI=1S/C26H28ClNO/c1-28(2)19-20-29-24-15-13-23(14-16-24)26(22-11-7-4-8-12-22)25(17-18-27)21-9-5-3-6-10-21/h3-16H,17-20H2,1-2H3/b26-25-	405.96	6.56	Positive	M+H	Phenylpropanoids and polyketides	Stilbenes	Not avaliable	28	26	1	0	1	0	0	1	0	0
246	Difenoconazole	1-[[2-[2-chloro-4-(4-chlorophenoxy)phenyl]-4-methyl-1,3-dioxolan-2-yl]methyl]-1,2,4-triazole	C19H17Cl2N3O3	119446-68-3	86173	CC1COC(O1)(CN2C=NC=N2)C3=C(C=C(C=C3)OC4=CC=C(C=C4)Cl)Cl	InChI=1S/C19H17Cl2N3O3/c1-13-9-25-19(27-13,10-24-12-22-11-23-24)17-7-6-16(8-18(17)21)26-15-4-2-14(20)3-5-15/h2-8,11-13H,9-10H2,1H3	406.263	5.2	Positive	M+H	Benzenoids	Benzene and substituted derivatives	Diphenylethers	17	19	3	0	3	0	0	2	0	0
247	Lincomycin	(2S,4R)-N-[(1R,2R)-2-hydroxy-1-[(2R,3R,4S,5R,6R)-3,4,5-trihydroxy-6-methylsulfanyloxan-2-yl]propyl]-1-methyl-4-propylpyrrolidine-2-carboxamide	C18H34N2O6S	154-21-2	3000540	CCC[C@@H]1C[C@H](N(C1)C)C(=O)N[C@@H]([C@@H]2[C@@H]([C@@H]([C@H]([C@H](O2)SC)O)O)O)[C@@H](C)O	InChI=1S/C18H34N2O6S/c1-5-6-10-7-11(20(3)8-10)17(25)19-12(9(2)21)16-14(23)13(22)15(24)18(26-16)27-4/h9-16,18,21-24H,5-8H2,1-4H3,(H,19,25)/t9-,10-,11+,12-,13+,14-,15-,16-,18-/m1/s1	406.537	0.29	Positive	M+H	Organic acids and derivatives	Carboxylic acids and derivatives	Amino acids, peptides, and analogues	34	18	6	0	2	1	0	0	0	0
248	Trifloxystrobin	methyl (2Z)-2-methoxyimino-2-[2-[[(Z)-1-[3-(trifluoromethyl)phenyl]ethylideneamino]oxymethyl]phenyl]acetate	C20H19F3N2O4	141517-21-7	53627428	C/C(=N\OCC1=CC=CC=C1/C(=N\OC)/C(=O)OC)/C2=CC(=CC=C2)C(F)(F)F	InChI=1S/C20H19F3N2O4/c1-13(14-8-6-9-16(11-14)20(21,22)23)24-29-12-15-7-4-5-10-17(15)18(25-28-3)19(26)27-2/h4-11H,12H2,1-3H3/b24-13-,25-18-	408.371	6.62	Positive	M+H	Benzenoids	Benzene and substituted derivatives	Trifluoromethylbenzenes	19	20	4	3	2	0	0	0	0	0
249	Nicosulfuron	2-[(4,6-dimethoxypyrimidin-2-yl)carbamoylsulfamoyl]-N,N-dimethylpyridine-3-carboxamide	C15H18N6O6S	111991-09-4	73281	CN(C)C(=O)C1=C(N=CC=C1)S(=O)(=O)NC(=O)NC2=NC(=CC(=N2)OC)OC	InChI=1S/C15H18N6O6S/c1-21(2)13(22)9-6-5-7-16-12(9)28(24,25)20-15(23)19-14-17-10(26-3)8-11(18-14)27-4/h5-8H,1-4H3,(H2,17,18,19,20,23)	410.405	-1.15	Positive	M+H	Organoheterocyclic compounds	Pyridines and derivatives	Pyridinesulfonamides	18	15	6	0	6	1	0	0	0	0
250	Tris(3,5-dimethylphenyl) phosphate	tris(3,5-dimethylphenyl) phosphate	C24H27O4P	25653-16-1	33133	CC1=CC(=CC(=C1)OP(=O)(OC2=CC(=CC(=C2)C)C)OC3=CC(=CC(=C3)C)C)C	InChI=1S/C24H27O4P/c1-16-7-17(2)11-22(10-16)26-29(25,27-23-12-18(3)8-19(4)13-23)28-24-14-20(5)9-21(6)15-24/h7-15H,1-6H3	410.442	7.98	Positive	M+H	Organic acids and derivatives	Organic phosphoric acids and derivatives	Phosphate esters	27	24	4	0	0	0	1	0	0	0
251	Cyflufenamid	N-[(E)-N-(cyclopropylmethoxy)-C-[2,3-difluoro-6-(trifluoromethyl)phenyl]carbonimidoyl]-2-phenylacetamide	C20H17F5N2O2	180409-60-3	136257767	C1CC1CO/N=C(/C2=C(C=CC(=C2F)F)C(F)(F)F)\NC(=O)CC3=CC=CC=C3	InChI=1S/C20H17F5N2O2/c21-15-9-8-14(20(23,24)25)17(18(15)22)19(27-29-11-13-6-7-13)26-16(28)10-12-4-2-1-3-5-12/h1-5,8-9,13H,6-7,10-11H2,(H,26,27,28)	412.353	5.78	Positive	M+H	Benzenoids	Benzene and substituted derivatives	Trifluoromethylbenzenes	17	20	2	5	2	0	0	0	0	0
252	Perfluorooctanoic acid	2,2,3,3,4,4,5,5,6,6,7,7,8,8,8-pentadecafluorooctanoic acid	C8HF15O2	335-67-1	9554	C(=O)(C(C(C(C(C(C(C(F)(F)F)(F)F)(F)F)(F)F)(F)F)(F)F)(F)F)O	InChI=1S/C8HF15O2/c9-2(10,1(24)25)3(11,12)4(13,14)5(15,16)6(17,18)7(19,20)8(21,22)23/h(H,24,25)	414.068	4.81	Negative	M-H	Organohalogen compounds	Alkyl halides	Alkyl fluorides	1	8	2	15	0	0	0	0	0	0
253	Miconazole	1-[2-(2,4-dichlorophenyl)-2-[(2,4-dichlorophenyl)methoxy]ethyl]imidazole	C18H14Cl4N2O	22916-47-8	4189	C1=CC(=C(C=C1Cl)Cl)COC(CN2C=CN=C2)C3=C(C=C(C=C3)Cl)Cl	InChI=1S/C18H14Cl4N2O/c19-13-2-1-12(16(21)7-13)10-25-18(9-24-6-5-23-11-24)15-4-3-14(20)8-17(15)22/h1-8,11,18H,9-10H2	416.129	6.25	Positive	M+H	Benzenoids	Benzene and substituted derivatives	Benzylethers	14	18	1	0	2	0	0	4	0	0
254	Cypermethrin (peak2)	[cyano-(3-phenoxyphenyl)methyl] 3-(2,2-dichloroethenyl)-2,2-dimethylcyclopropane-1-carboxylate	C22H19Cl2NO3	52315-07-8	2912	CC1(C(C1C(=O)OC(C#N)C2=CC(=CC=C2)OC3=CC=CC=C3)C=C(Cl)Cl)C	InChI=1S/C22H19Cl2NO3/c1-22(2)17(12-19(23)24)20(22)21(26)28-18(13-25)14-7-6-10-16(11-14)27-15-8-4-3-5-9-15/h3-12,17-18,20H,1-2H3	416.297	6.38	Positive	M+NH4	Lipids and lipid-like molecules	Fatty Acyls	Fatty acid esters	19	22	3	0	1	0	0	2	0	0
255	D-y-Tochopherol	(2R)-2,7,8-trimethyl-2-[(4R,8R)-4,8,12-trimethyltridecyl]-3,4-dihydrochromen-6-ol	C28H48O2	54-28-4	92729	CC1=C(C=C2CC[C@@](OC2=C1C)(C)CCC[C@H](C)CCC[C@H](C)CCCC(C)C)O	InChI=1S/C28H48O2/c1-20(2)11-8-12-21(3)13-9-14-22(4)15-10-17-28(7)18-16-25-19-26(29)23(5)24(6)27(25)30-28/h19-22,29H,8-18H2,1-7H3/t21-,22-,28-/m1/s1	416.7	11.63	Positive	[M+H]/2	Lipids and lipid-like molecules	Prenol lipids	Quinone and hydroquinone lipids	48	28	2	0	0	0	0	0	0	0
256	Fenvalerate	[cyano-(3-phenoxyphenyl)methyl] 2-(4-chlorophenyl)-3-methylbutanoate	C25H22ClNO3	51630-58-1	3347	CC(C)C(C1=CC=C(C=C1)Cl)C(=O)OC(C#N)C2=CC(=CC=C2)OC3=CC=CC=C3	InChI=1S/C25H22ClNO3/c1-17(2)24(18-11-13-20(26)14-12-18)25(28)30-23(16-27)19-7-6-10-22(15-19)29-21-8-4-3-5-9-21/h3-15,17,23-24H,1-2H3	419.9	6.76	Positive	M+NH4	Lipids and lipid-like molecules	Fatty Acyls	Fatty acid esters	22	25	3	0	1	0	0	1	0	0
257	Bifenthrin	(2-methyl-3-phenylphenyl)methyl (1S,3S)-3-[(E)-2-chloro-3,3,3-trifluoroprop-1-enyl]-2,2-dimethylcyclopropane-1-carboxylate	C23H22ClF3O2	82657-04-3	59718428	CC1=C(C=CC=C1C2=CC=CC=C2)COC(=O)[C@H]3[C@H](C3(C)C)/C=C(\C(F)(F)F)/Cl	InChI=1S/C23H22ClF3O2/c1-14-16(10-7-11-17(14)15-8-5-4-6-9-15)13-29-21(28)20-18(22(20,2)3)12-19(24)23(25,26)27/h4-12,18,20H,13H2,1-3H3/b19-12+/t18-,20-/m1/s1	422.868	8.15	Positive	M+NH4	Benzenoids	Benzene and substituted derivatives	Biphenyls and derivatives	22	23	2	3	0	0	0	1	0	0
258	HT-2 Toxin	[(1S,2R,4S,7R,9R,10R,11S,12S)-2-(acetyloxymethyl)-10,11-dihydroxy-1,5-dimethylspiro[8-oxatricyclo[7.2.1.02,7]dodec-5-ene-12,2'-oxirane]-4-yl] 3-methylbutanoate	C22H32O8	26934-87-2	10093830	CC1=C[C@@H]2[C@](C[C@@H]1OC(=O)CC(C)C)([C@]3([C@@H]([C@H]([C@H]([C@@]34CO4)O2)O)O)C)COC(=O)C	InChI=1S/C22H32O8/c1-11(2)6-16(24)29-14-8-21(9-27-13(4)23)15(7-12(14)3)30-19-17(25)18(26)20(21,5)22(19)10-28-22/h7,11,14-15,17-19,25-26H,6,8-10H2,1-5H3/t14-,15+,17+,18+,19+,20+,21+,22-/m0/s1	424.485	1.67	Positive	M+NH4	Lipids and lipid-like molecules	Prenol lipids	Sesquiterpenoids	32	22	8	0	0	0	0	0	0	0
259	Bromopropylate	propan-2-yl 2,2-bis(4-bromophenyl)-2-hydroxyacetate	C17H16Br2O3	18181-80-1	28936	CC(C)OC(=O)C(C1=CC=C(C=C1)Br)(C2=CC=C(C=C2)Br)O	InChI=1S/C17H16Br2O3/c1-11(2)22-16(20)17(21,12-3-7-14(18)8-4-12)13-5-9-15(19)10-6-13/h3-11,21H,1-2H3	428.115	4.9	Positive	M+Na	Benzenoids	Benzene and substituted derivatives	Diphenylmethanes	16	17	3	0	0	0	0	0	2	0
260	6:2FTS	3,3,4,4,5,5,6,6,7,7,8,8,8-tridecafluorooctane-1-sulfonic acid	C8H5F13O3S	27619-97-2	119688	C(CS(=O)(=O)O)C(C(C(C(C(C(F)(F)F)(F)F)(F)F)(F)F)(F)F)(F)F	InChI=1S/C8H5F13O3S/c9-3(10,1-2-25(22,23)24)4(11,12)5(13,14)6(15,16)7(17,18)8(19,20)21/h1-2H2,(H,22,23,24)	428.17	2.66	Negative	M-H	Organic acids and derivatives	Organic sulfonic acids and derivatives	Organosulfonic acids and derivatives	5	8	3	13	0	1	0	0	0	0
261	Bicalutamide	N-[4-cyano-3-(trifluoromethyl)phenyl]-3-(4-fluorophenyl)sulfonyl-2-hydroxy-2-methylpropanamide	C18H14F4N2O4S	90357-06-5	2375	CC(CS(=O)(=O)C1=CC=C(C=C1)F)(C(=O)NC2=CC(=C(C=C2)C#N)C(F)(F)F)O	InChI=1S/C18H14F4N2O4S/c1-17(26,10-29(27,28)14-6-3-12(19)4-7-14)16(25)24-13-5-2-11(9-23)15(8-13)18(20,21)22/h2-8,26H,10H2,1H3,(H,24,25)	430.373	2.3	Positive	M+H	Benzenoids	Benzene and substituted derivatives	Trifluoromethylbenzenes	14	18	4	4	2	1	0	0	0	0
262	Tris(2,3-dichloro-2-propyl)phosphate	bis[(2R)-2,3-dichloropropyl] [(2S)-2,3-dichloropropyl] phosphate	C9H15Cl6O4P	78-43-3	97301232	C([C@H](CCl)Cl)OP(=O)(OC[C@H](CCl)Cl)OC[C@@H](CCl)Cl	InChI=1S/C9H15Cl6O4P/c10-1-7(13)4-17-20(16,18-5-8(14)2-11)19-6-9(15)3-12/h7-9H,1-6H2/t7-,8-,9+/m0/s1	430.905	3.65	Positive	M+H	Organic acids and derivatives	Organic phosphoric acids and derivatives	Phosphate esters	15	9	4	0	0	0	1	6	0	0
263	Ochratoxin C	ethyl (2S)-2-[[(3R)-5-chloro-8-hydroxy-3-methyl-1-oxo-3,4-dihydroisochromene-7-carbonyl]amino]-3-phenylpropanoate	C22H22ClNO6	4865-85-4	20997	CCOC(=O)[C@H](CC1=CC=CC=C1)NC(=O)C2=CC(=C3C[C@H](OC(=O)C3=C2O)C)Cl	InChI=1S/C22H22ClNO6/c1-3-29-21(27)17(10-13-7-5-4-6-8-13)24-20(26)15-11-16(23)14-9-12(2)30-22(28)18(14)19(15)25/h4-8,11-12,17,25H,3,9-10H2,1-2H3,(H,24,26)/t12-,17+/m1/s1	431.866	5.19	Positive	M+H	Phenylpropanoids and polyketides	Ochratoxins and related substances	Not avaliable	22	22	6	0	1	0	0	1	0	0
264	Tris(2-ethylhexyl) phosphate	tris(2-ethylhexyl) phosphate	C24H51O4P	78-42-2	6537	CCCCC(CC)COP(=O)(OCC(CC)CCCC)OCC(CC)CCCC	InChI=1S/C24H51O4P/c1-7-13-16-22(10-4)19-26-29(25,27-20-23(11-5)17-14-8-2)28-21-24(12-6)18-15-9-3/h22-24H,7-21H2,1-6H3	434.633	9.49	Positive	M+H	Organic acids and derivatives	Organic phosphoric acids and derivatives	Phosphate esters	51	24	4	0	0	0	1	0	0	0
265	Paxilline	(1S,2R,5S,7R,11S,14S)-11-hydroxy-7-(2-hydroxypropan-2-yl)-1,2-dimethyl-6-oxa-23-azahexacyclo[12.10.0.02,11.05,10.016,24.017,22]tetracosa-9,16(24),17,19,21-pentaen-8-one	C27H33NO4	57186-25-1	105008	C[C@]12CC[C@H]3C(=CC(=O)[C@H](O3)C(C)(C)O)[C@@]1(CC[C@@H]4[C@@]2(C5=C(C4)C6=CC=CC=C6N5)C)O	InChI=1S/C27H33NO4/c1-24(2,30)23-20(29)14-18-21(32-23)10-11-25(3)26(4)15(9-12-27(18,25)31)13-17-16-7-5-6-8-19(16)28-22(17)26/h5-8,14-15,21,23,28,30-31H,9-13H2,1-4H3/t15-,21-,23-,25+,26+,27+/m0/s1	435.555	4.13	Positive	M+H	Organoheterocyclic compounds	Naphthopyrans	Not avaliable	33	27	4	0	1	0	0	0	0	0
266	Deflazacort	[2-[(1S,2S,4R,8S,9S,11S,12S,13R)-11-hydroxy-6,9,13-trimethyl-16-oxo-5-oxa-7-azapentacyclo[10.8.0.02,9.04,8.013,18]icosa-6,14,17-trien-8-yl]-2-oxoethyl] acetate	C25H31NO6	14484-47-0	189821	CC1=N[C@@]2([C@H](O1)C[C@@H]3[C@@]2(C[C@@H]([C@H]4[C@H]3CCC5=CC(=O)C=C[C@]45C)O)C)C(=O)COC(=O)C	InChI=1S/C25H31NO6/c1-13-26-25(20(30)12-31-14(2)27)21(32-13)10-18-17-6-5-15-9-16(28)7-8-23(15,3)22(17)19(29)11-24(18,25)4/h7-9,17-19,21-22,29H,5-6,10-12H2,1-4H3/t17-,18-,19-,21+,22+,23-,24-,25+/m0/s1	441.517	1.31	Positive	M+H	Lipids and lipid-like molecules	Steroids and steroid derivatives	Pregnane steroids	31	25	6	0	1	0	0	0	0	0
267	Tetracycline	(4S,4aS,5aS,6S,12aR)-4-(dimethylamino)-1,6,10,11,12a-pentahydroxy-6-methyl-3,12-dioxo-4,4a,5,5a-tetrahydrotetracene-2-carboxamide	C22H24N2O8	60-54-8	54675776	C[C@@]1([C@H]2C[C@H]3[C@@H](C(=O)C(=C([C@]3(C(=O)C2=C(C4=C1C=CC=C4O)O)O)O)C(=O)N)N(C)C)O	InChI=1S/C22H24N2O8/c1-21(31)8-5-4-6-11(25)12(8)16(26)13-9(21)7-10-15(24(2)3)17(27)14(20(23)30)19(29)22(10,32)18(13)28/h4-6,9-10,15,25-26,29,31-32H,7H2,1-3H3,(H2,23,30)/t9-,10-,15-,21+,22-/m0/s1	444.435	-1.36	Positive	M+H	Phenylpropanoids and polyketides	Tetracyclines	Not avaliable	24	22	8	0	2	0	0	0	0	0
268	Doxycycline	(4S,4aR,5S,5aR,6R,12aR)-4-(dimethylamino)-1,5,10,11,12a-pentahydroxy-6-methyl-3,12-dioxo-4a,5,5a,6-tetrahydro-4H-tetracene-2-carboxamide	C22H24N2O8	564-25-0	54671203	C[C@@H]1[C@H]2[C@@H]([C@H]3[C@@H](C(=O)C(=C([C@]3(C(=O)C2=C(C4=C1C=CC=C4O)O)O)O)C(=O)N)N(C)C)O	InChI=1S/C22H24N2O8/c1-7-8-5-4-6-9(25)11(8)16(26)12-10(7)17(27)14-15(24(2)3)18(28)13(21(23)31)20(30)22(14,32)19(12)29/h4-7,10,14-15,17,25-27,30,32H,1-3H3,(H2,23,31)/t7-,10+,14+,15-,17-,22-/m0/s1	444.435	-1.4	Positive	M+H	Phenylpropanoids and polyketides	Tetracyclines	Not avaliable	24	22	8	0	2	0	0	0	0	0
269	Difenacoum (peak2)	4-hydroxy-3-[3-(4-phenylphenyl)-1,2,3,4-tetrahydronaphthalen-1-yl]chromen-2-one	C31H24O3	56073-07-5	54676884	C1C(CC2=CC=CC=C2C1C3=C(C4=CC=CC=C4OC3=O)O)C5=CC=C(C=C5)C6=CC=CC=C6	InChI=1S/C31H24O3/c32-30-26-12-6-7-13-28(26)34-31(33)29(30)27-19-24(18-23-10-4-5-11-25(23)27)22-16-14-21(15-17-22)20-8-2-1-3-9-20/h1-17,24,27,32H,18-19H2	444.521	7.62	Positive	M+H	Benzenoids	Naphthalenes	Phenylnaphthalenes	24	31	3	0	0	0	0	0	0	0
270	PFHpS	1,1,2,2,3,3,4,4,5,5,6,6,7,7,7-pentadecafluoroheptane-1-sulfonic acid	C7HF15O3S	375-92-8	67820	C(C(C(C(F)(F)F)(F)F)(F)F)(C(C(C(F)(F)S(=O)(=O)O)(F)F)(F)F)(F)F	InChI=1S/C7HF15O3S/c8-1(9,2(10,11)4(14,15)6(18,19)20)3(12,13)5(16,17)7(21,22)26(23,24)25/h(H,23,24,25)	450.12	3.82	Negative	M-H	Organohalogen compounds	Alkyl halides	Alkyl fluorides	1	7	3	15	0	1	0	0	0	0
271	Tris(2-isopropylphenyl) phosphate	tris(2-propan-2-ylphenyl) phosphate	C27H33O4P	64532-95-2	33661	CC(C)C1=CC=CC=C1OP(=O)(OC2=CC=CC=C2C(C)C)OC3=CC=CC=C3C(C)C	InChI=1S/C27H33O4P/c1-19(2)22-13-7-10-16-25(22)29-32(28,30-26-17-11-8-14-23(26)20(3)4)31-27-18-12-9-15-24(27)21(5)6/h7-21H,1-6H3	452.522	9.07	Positive	M+H	Organic acids and derivatives	Organic phosphoric acids and derivatives	Phosphate esters	33	27	4	0	0	0	1	0	0	0
272	Dioxathion	(3-diethoxyphosphinothioylsulfanyl-1,4-dioxan-2-yl)sulfanyl-diethoxy-sulfanylidene-lambda5-phosphane	C12H26O6P2S4	78-34-2	6531	CCOP(=S)(OCC)SC1C(OCCO1)SP(=S)(OCC)OCC	InChI=1S/C12H26O6P2S4/c1-5-15-19(21,16-6-2)23-11-12(14-10-9-13-11)24-20(22,17-7-3)18-8-4/h11-12H,5-10H2,1-4H3	456.539	3.45	Positive	M+Na	Organoheterocyclic compounds	Dioxanes	1,4-dioxanes	26	12	6	0	0	4	2	0	0	0
273	Fumagillin	(2E,4E,6E,8E)-10-[[(3R,4S,5S,6R)-5-methoxy-4-[(2R,3R)-2-methyl-3-(3-methylbut-2-enyl)oxiran-2-yl]-1-oxaspiro[2.5]octan-6-yl]oxy]-10-oxodeca-2,4,6,8-tetraenoic acid	C26H34O7	23110-15-8	6917655	CC(=CC[C@@H]1[C@@](O1)(C)[C@H]2[C@@H]([C@@H](CC[C@]23CO3)OC(=O)/C=C/C=C/C=C/C=C/C(=O)O)OC)C	InChI=1S/C26H34O7/c1-18(2)13-14-20-25(3,33-20)24-23(30-4)19(15-16-26(24)17-31-26)32-22(29)12-10-8-6-5-7-9-11-21(27)28/h5-13,19-20,23-24H,14-17H2,1-4H3,(H,27,28)/b7-5+,8-6+,11-9+,12-10+/t19-,20-,23-,24-,25+,26+/m1/s1	458.544	4.79	Positive	M+H	Lipids and lipid-like molecules	Fatty Acyls	Fatty acids and conjugates	34	26	7	0	0	0	0	0	0	0
274	Oxytetracycline	(4S,4aR,5S,5aR,6S,12aR)-4-(dimethylamino)-1,5,6,10,11,12a-hexahydroxy-6-methyl-3,12-dioxo-4,4a,5,5a-tetrahydrotetracene-2-carboxamide	C22H24N2O9	79-57-2	54675779	C[C@@]1([C@H]2[C@@H]([C@H]3[C@@H](C(=O)C(=C([C@]3(C(=O)C2=C(C4=C1C=CC=C4O)O)O)O)C(=O)N)N(C)C)O)O	InChI=1S/C22H24N2O9/c1-21(32)7-5-4-6-8(25)9(7)15(26)10-12(21)17(28)13-14(24(2)3)16(27)11(20(23)31)19(30)22(13,33)18(10)29/h4-6,12-14,17,25-26,28,30,32-33H,1-3H3,(H2,23,31)/t12-,13-,14+,17+,21-,22+/m1/s1	460.434	-2.9	Positive	M+H	Phenylpropanoids and polyketides	Tetracyclines	Not avaliable	24	22	9	0	2	0	0	0	0	0
275	PFECHS	1,2,2,3,3,4,5,5,6,6-decafluoro-4-(1,1,2,2,2-pentafluoroethyl)cyclohexane-1-sulfonic acid	C8HF15O3S	646-83-3	101650	C1(C(C(C(C(C1(F)F)(F)F)(F)S(=O)(=O)O)(F)F)(F)F)(C(C(F)(F)F)(F)F)F	InChI=1S/C8HF15O3S/c9-1(4(14,15)8(21,22)23)2(10,11)5(16,17)7(20,27(24,25)26)6(18,19)3(1,12)13/h(H,24,25,26)	462.13	4.42	Negative	M-H	Organohalogen compounds	Alkyl halides	Cyclohexyl halides	1	8	3	15	0	1	0	0	0	0
276	Perfluorononanoic acid	2,2,3,3,4,4,5,5,6,6,7,7,8,8,9,9,9-heptadecafluorononanoic acid	C9HF17O2	375-95-1	67821	C(=O)(C(C(C(C(C(C(C(C(F)(F)F)(F)F)(F)F)(F)F)(F)F)(F)F)(F)F)(F)F)O	InChI=1S/C9HF17O2/c10-2(11,1(27)28)3(12,13)4(14,15)5(16,17)6(18,19)7(20,21)8(22,23)9(24,25)26/h(H,27,28)	464.076	5.48	Negative	M-H	Organohalogen compounds	Alkyl halides	Alkyl fluorides	1	9	2	17	0	0	0	0	0	0
277	Fusariotoxin T-2	[(1S,2R,4S,7R,9R,10R,11S,12S)-11-acetyloxy-2-(acetyloxymethyl)-10-hydroxy-1,5-dimethylspiro[8-oxatricyclo[7.2.1.02,7]dodec-5-ene-12,2'-oxirane]-4-yl] 3-methylbutanoate	C24H34O9	21259-20-1	5284461	CC1=C[C@@H]2[C@](C[C@@H]1OC(=O)CC(C)C)([C@]3([C@@H]([C@H]([C@H]([C@@]34CO4)O2)O)OC(=O)C)C)COC(=O)C	InChI=1S/C24H34O9/c1-12(2)7-18(27)32-16-9-23(10-29-14(4)25)17(8-13(16)3)33-21-19(28)20(31-15(5)26)22(23,6)24(21)11-30-24/h8,12,16-17,19-21,28H,7,9-11H2,1-6H3/t16-,17+,19+,20+,21+,22+,23+,24-/m0/s1	466.521	2.77	Positive	M+NH4	Lipids and lipid-like molecules	Prenol lipids	Sesquiterpenoids	34	24	9	0	0	0	0	0	0	0
278	Halfenprox	1-[bromo(difluoro)methoxy]-4-[2-methyl-1-[(3-phenoxyphenyl)methoxy]propan-2-yl]benzene	C24H23BrF2O3	111872-58-3	10140464	CC(C)(COCC1=CC(=CC=C1)OC2=CC=CC=C2)C3=CC=C(C=C3)OC(F)(F)Br	InChI=1S/C24H23BrF2O3/c1-23(2,19-11-13-21(14-12-19)30-24(25,26)27)17-28-16-18-7-6-10-22(15-18)29-20-8-4-3-5-9-20/h3-15H,16-17H2,1-2H3	477.338	8.35	Positive	M+NH4	Benzenoids	Benzene and substituted derivatives	Diphenylethers	23	24	3	2	0	0	0	0	1	0
279	Chlorotetracycline	(4S,4aS,5aS,6S,12aR)-7-chloro-4-(dimethylamino)-1,6,10,11,12a-pentahydroxy-6-methyl-3,12-dioxo-4,4a,5,5a-tetrahydrotetracene-2-carboxamide	C22H23ClN2O8	57-62-5	54675777	C[C@@]1([C@H]2C[C@H]3[C@@H](C(=O)C(=C([C@]3(C(=O)C2=C(C4=C(C=CC(=C41)Cl)O)O)O)O)C(=O)N)N(C)C)O	InChI=1S/C22H23ClN2O8/c1-21(32)7-6-8-15(25(2)3)17(28)13(20(24)31)19(30)22(8,33)18(29)11(7)16(27)12-10(26)5-4-9(23)14(12)21/h4-5,7-8,15,26-27,30,32-33H,6H2,1-3H3,(H2,24,31)/t7-,8-,15-,21-,22-/m0/s1	478.88	-0.72	Positive	M+H	Phenylpropanoids and polyketides	Tetracyclines	Not avaliable	23	22	8	0	2	0	0	1	0	0
280	N-AP-FHxSA	N-[3-(dimethylamino)propyl]-1,1,2,2,3,3,4,4,5,5,6,6,6-tridecafluorohexane-1-sulfonamide	C11H13F13N2O2S	50598-28-2	111913	CN(C)CCCNS(=O)(=O)C(C(C(C(C(C(F)(F)F)(F)F)(F)F)(F)F)(F)F)(F)F	InChI=1S/C11H13F13N2O2S/c1-26(2)5-3-4-25-29(27,28)11(23,24)9(18,19)7(14,15)6(12,13)8(16,17)10(20,21)22/h25H,3-5H2,1-2H3	484.28	5.12	Positive	M+H	Organic acids and derivatives	Organic sulfonic acids and derivatives	Organosulfonic acids and derivatives	13	11	2	13	2	1	0	0	0	0
281	Vardenafil	2-[2-ethoxy-5-(4-ethylpiperazin-1-yl)sulfonylphenyl]-5-methyl-7-propyl-3H-imidazo[5,1-f][1,2,4]triazin-4-one	C23H32N6O4S	224785-90-4	135400189	CCCC1=NC(=C2N1N=C(NC2=O)C3=C(C=CC(=C3)S(=O)(=O)N4CCN(CC4)CC)OCC)C	InChI=1S/C23H32N6O4S/c1-5-8-20-24-16(4)21-23(30)25-22(26-29(20)21)18-15-17(9-10-19(18)33-7-3)34(31,32)28-13-11-27(6-2)12-14-28/h9-10,15H,5-8,11-14H2,1-4H3,(H,25,26,30)	488.603	2.96	Positive	M+H	Benzenoids	Benzene and substituted derivatives	Benzenesulfonamides	32	23	4	0	6	1	0	0	0	0
282	Flufenoxuron	N-[[4-[2-chloro-4-(trifluoromethyl)phenoxy]-2-fluorophenyl]carbamoyl]-2,6-difluorobenzamide	C21H11ClF6N2O3	101463-69-8	91766	C1=CC(=C(C(=C1)F)C(=O)NC(=O)NC2=C(C=C(C=C2)OC3=C(C=C(C=C3)C(F)(F)F)Cl)F)F	InChI=1S/C21H11ClF6N2O3/c22-12-8-10(21(26,27)28)4-7-17(12)33-11-5-6-16(15(25)9-11)29-20(32)30-19(31)18-13(23)2-1-3-14(18)24/h1-9H,(H2,29,30,31,32)	488.767	5.97	Negative	M-H	Benzenoids	Benzene and substituted derivatives	N-phenylureas	11	21	3	6	2	0	0	1	0	0
283	Glibenclamide	5-chloro-N-[2-[4-(cyclohexylcarbamoylsulfamoyl)phenyl]ethyl]-2-methoxybenzamide	C23H28ClN3O5S	10238-21-8	3488	COC1=C(C=C(C=C1)Cl)C(=O)NCCC2=CC=C(C=C2)S(=O)(=O)NC(=O)NC3CCCCC3	InChI=1S/C23H28ClN3O5S/c1-32-21-12-9-17(24)15-20(21)22(28)25-14-13-16-7-10-19(11-8-16)33(30,31)27-23(29)26-18-5-3-2-4-6-18/h7-12,15,18H,2-6,13-14H2,1H3,(H,25,28)(H2,26,27,29)	494.003	4.79	Positive	M+H	Benzenoids	Benzene and substituted derivatives	Benzenesulfonamides	28	23	5	0	3	1	0	1	0	0
284	Tris[4-(2-methyl-2-propanyl)phenyl] phosphate	tris(4-tert-butylphenyl) phosphate	C30H39O4P	78-33-1	6530	CC(C)(C)C1=CC=C(C=C1)OP(=O)(OC2=CC=C(C=C2)C(C)(C)C)OC3=CC=C(C=C3)C(C)(C)C	InChI=1S/C30H39O4P/c1-28(2,3)22-10-16-25(17-11-22)32-35(31,33-26-18-12-23(13-19-26)29(4,5)6)34-27-20-14-24(15-21-27)30(7,8)9/h10-21H,1-9H3	494.602	10.43	Positive	M+H	Organic acids and derivatives	Organic phosphoric acids and derivatives	Phosphate esters	39	30	4	0	0	0	1	0	0	0
285	Cytochalasin E	(1S,5E,7R,9S,11E,13S,14S,16R,17S,18S,19S)-19-benzyl-7-hydroxy-7,9,16,17-tetramethyl-2,4,15-trioxa-20-azatetracyclo[11.8.0.01,18.014,16]henicosa-5,11-diene-3,8,21-trione	C28H33NO7	36011-19-5	5458385	C[C@H]1C/C=C/[C@H]2[C@H]3[C@](O3)([C@H]([C@@H]4[C@]2(C(=O)N[C@H]4CC5=CC=CC=C5)OC(=O)O/C=C/[C@@](C1=O)(C)O)C)C	InChI=1S/C28H33NO7/c1-16-9-8-12-19-23-27(4,35-23)17(2)21-20(15-18-10-6-5-7-11-18)29-24(31)28(19,21)36-25(32)34-14-13-26(3,33)22(16)30/h5-8,10-14,16-17,19-21,23,33H,9,15H2,1-4H3,(H,29,31)/b12-8+,14-13+/t16-,17-,19-,20-,21-,23-,26+,27+,28+/m0/s1	495.564	2.45	Positive	M+NH4	Alkaloids and derivatives	Cytochalasans	Not avaliable	33	28	7	0	1	0	0	0	0	0
286	N-TAmP-FHxSA	N-(3-aminopropyl)-3,3,4,4,5,5,6,6,7,7,8,8,8-tridecafluoro-N-methyloctane-1-sulfonamide	C12H15F13N2O2S		87104599	CN(CCCN)S(=O)(=O)CCC(C(C(C(C(C(F)(F)F)(F)F)(F)F)(F)F)(F)F)(F)F	InChI=1S/C12H15F13N2O2S/c1-27(5-2-4-26)30(28,29)6-3-7(13,14)8(15,16)9(17,18)10(19,20)11(21,22)12(23,24)25/h2-6,26H2,1H3	498.31	4.16	Positive	M+H	Organic acids and derivatives	Organic sulfonic acids and derivatives	Organosulfonic acids and derivatives	15	12	2	13	2	1	0	0	0	0
287	Perfluorooctanesulphonamide	1,1,2,2,3,3,4,4,5,5,6,6,7,7,8,8,8-heptadecafluorooctane-1-sulfonamide	C8H2F17NO2S	754-91-6	69785	C(C(C(C(C(F)(F)S(=O)(=O)N)(F)F)(F)F)(F)F)(C(C(C(F)(F)F)(F)F)(F)F)(F)F	InChI=1S/C8H2F17NO2S/c9-1(10,3(13,14)5(17,18)7(21,22)23)2(11,12)4(15,16)6(19,20)8(24,25)29(26,27)28/h(H2,26,27,28)	499.145	5.8	Negative	M-H	Organohalogen compounds	Alkyl halides	Alkyl fluorides	2	8	2	17	1	1	0	0	0	0
288	Perfluorooctanesulfonic acid	1,1,2,2,3,3,4,4,5,5,6,6,7,7,8,8,8-heptadecafluorooctane-1-sulfonic acid	C8HF17O3S	1763-23-1	74483	C(C(C(C(C(F)(F)S(=O)(=O)O)(F)F)(F)F)(F)F)(C(C(C(F)(F)F)(F)F)(F)F)(F)F	InChI=1S/C8HF17O3S/c9-1(10,3(13,14)5(17,18)7(21,22)23)2(11,12)4(15,16)6(19,20)8(24,25)29(26,27)28/h(H,26,27,28)	500.13	4.49	Negative	M-H	Organohalogen compounds	Alkyl halides	Alkyl fluorides	1	8	3	17	0	1	0	0	0	0
289	Deltamethrin	[(S)-cyano-(3-phenoxyphenyl)methyl] (1R,3R)-3-(2,2-dibromoethenyl)-2,2-dimethylcyclopropane-1-carboxylate	C22H19Br2NO3	52918-63-5	40585	CC1([C@H]([C@H]1C(=O)O[C@H](C#N)C2=CC(=CC=C2)OC3=CC=CC=C3)C=C(Br)Br)C	InChI=1S/C22H19Br2NO3/c1-22(2)17(12-19(23)24)20(22)21(26)28-18(13-25)14-7-6-10-16(11-14)27-15-8-4-3-5-9-15/h3-12,17-18,20H,1-2H3/t17-,18+,20-/m0/s1	505.199	6.18	Positive	M+NH4	Lipids and lipid-like molecules	Fatty Acyls	Fatty acid esters	19	22	3	0	1	0	0	0	2	0
290	Verruculogen	(9R,14S,17S,23R,24S)-23,24-dihydroxy-5-methoxy-12,12-dimethyl-9-(2-methylprop-1-enyl)-10,11-dioxa-8,15,21-triazahexacyclo[12.10.1.02,7.08,25.015,23.017,21]pentacosa-1(25),2(7),3,5-tetraene-16,22-dione	C27H33N3O7	12771-72-1	13887805	CC(=C[C@@H]1N2C3=C(C=CC(=C3)OC)C4=C2[C@H](CC(OO1)(C)C)N5C(=O)[C@@H]6CCCN6C(=O)[C@@]5([C@H]4O)O)C	InChI=1S/C27H33N3O7/c1-14(2)11-20-29-18-12-15(35-5)8-9-16(18)21-22(29)19(13-26(3,4)37-36-20)30-24(32)17-7-6-10-28(17)25(33)27(30,34)23(21)31/h8-9,11-12,17,19-20,23,31,34H,6-7,10,13H2,1-5H3/t17-,19-,20+,23-,27+/m0/s1	511.567	4.08	Positive	M+H	Organoheterocyclic compounds	Indoles and derivatives	Pyridoindoles	33	27	7	0	3	0	0	0	0	0
291	Perfluorodecanoic acid	2,2,3,3,4,4,5,5,6,6,7,7,8,8,9,9,10,10,10-nonadecafluorodecanoic acid	C10HF19O2	335-76-2	9555	C(=O)(C(C(C(C(C(C(C(C(C(F)(F)F)(F)F)(F)F)(F)F)(F)F)(F)F)(F)F)(F)F)(F)F)O	InChI=1S/C10HF19O2/c11-2(12,1(30)31)3(13,14)4(15,16)5(17,18)6(19,20)7(21,22)8(23,24)9(25,26)10(27,28)29/h(H,30,31)	514.083	6.15	Negative	M-H	Organohalogen compounds	Alkyl halides	Alkyl fluorides	1	10	2	19	0	0	0	0	0	0
292	Brodifacoum (Peak1)	3-[3-[4-(4-bromophenyl)phenyl]-1,2,3,4-tetrahydronaphthalen-1-yl]-4-hydroxychromen-2-one	C31H23BrO3	56073-10-0	54680676	C1C(CC2=CC=CC=C2C1C3=C(C4=CC=CC=C4OC3=O)O)C5=CC=C(C=C5)C6=CC=C(C=C6)Br	InChI=1S/C31H23BrO3/c32-24-15-13-20(14-16-24)19-9-11-21(12-10-19)23-17-22-5-1-2-6-25(22)27(18-23)29-30(33)26-7-3-4-8-28(26)35-31(29)34/h1-16,23,27,33H,17-18H2	523.417	8.51	Positive	M+H	Benzenoids	Naphthalenes	Phenylnaphthalenes	23	31	3	0	0	0	0	0	1	0
293	Ceftiofur	(6R,7R)-7-[[(2E)-2-(2-amino-1,3-thiazol-4-yl)-2-methoxyiminoacetyl]amino]-3-(furan-2-carbonylsulfanylmethyl)-8-oxo-5-thia-1-azabicyclo[4.2.0]oct-2-ene-2-carboxylic acid	C19H17N5O7S3	80370-57-6	5484735	CO/N=C(/C1=CSC(=N1)N)\C(=O)N[C@H]2[C@@H]3N(C2=O)C(=C(CS3)CSC(=O)C4=CC=CO4)C(=O)O	InChI=1S/C19H17N5O7S3/c1-30-23-11(9-7-34-19(20)21-9)14(25)22-12-15(26)24-13(17(27)28)8(5-32-16(12)24)6-33-18(29)10-3-2-4-31-10/h2-4,7,12,16H,5-6H2,1H3,(H2,20,21)(H,22,25)(H,27,28)/b23-11+/t12-,16-/m1/s1	523.563	1.57	Positive	M+H	Organoheterocyclic compounds	Lactams	Beta lactams	17	19	7	0	5	3	0	0	0	0
294	Penfluridol	1-[4,4-bis(4-fluorophenyl)butyl]-4-[4-chloro-3-(trifluoromethyl)phenyl]piperidin-4-ol	C28H27ClF5NO	26864-56-2	33630	C1CN(CCC1(C2=CC(=C(C=C2)Cl)C(F)(F)F)O)CCCC(C3=CC=C(C=C3)F)C4=CC=C(C=C4)F	InChI=1S/C28H27ClF5NO/c29-26-12-7-21(18-25(26)28(32,33)34)27(36)13-16-35(17-14-27)15-1-2-24(19-3-8-22(30)9-4-19)20-5-10-23(31)11-6-20/h3-12,18,24,36H,1-2,13-17H2	523.965	7.84	Positive	M+H	Benzenoids	Benzene and substituted derivatives	Diphenylmethanes	27	28	1	5	1	0	0	1	0	0
295	Indoxacarb	methyl (4aS)-7-chloro-2-[methoxycarbonyl-[4-(trifluoromethoxy)phenyl]carbamoyl]-3,5-dihydroindeno[1,2-e][1,3,4]oxadiazine-4a-carboxylate	C22H17ClF3N3O7	173584-44-6	107720	COC(=O)[C@]12CC3=C(C1=NN(CO2)C(=O)N(C4=CC=C(C=C4)OC(F)(F)F)C(=O)OC)C=CC(=C3)Cl	InChI=1S/C22H17ClF3N3O7/c1-33-18(30)21-10-12-9-13(23)3-8-16(12)17(21)27-28(11-35-21)19(31)29(20(32)34-2)14-4-6-15(7-5-14)36-22(24,25)26/h3-9H,10-11H2,1-2H3/t21-/m0/s1	527.835	4.6	Positive	M+H	Benzenoids	Benzene and substituted derivatives	Phenylcarbamic acid esters	17	22	7	3	3	0	0	1	0	0
296	8:2FTS	3,3,4,4,5,5,6,6,7,7,8,8,9,9,10,10,10-heptadecafluorodecane-1-sulfonic acid	C10H5F17O3S	39108-34-4	3016044	C(CS(=O)(=O)O)C(C(C(C(C(C(C(C(F)(F)F)(F)F)(F)F)(F)F)(F)F)(F)F)(F)F)(F)F	InChI=1S/C10H5F17O3S/c11-3(12,1-2-31(28,29)30)4(13,14)5(15,16)6(17,18)7(19,20)8(21,22)9(23,24)10(25,26)27/h1-2H2,(H,28,29,30)	528.18	4	Negative	M-H	Organic acids and derivatives	Organic sulfonic acids and derivatives	Organosulfonic acids and derivatives	5	10	3	17	0	1	0	0	0	0
297	6:2ClPFAES	2-(6-chloro-1,1,2,2,3,3,4,4,5,5,6,6-dodecafluorohexoxy)-1,1,2,2-tetrafluoroethanesulfonic acid	C8HClF16O4S	756426-58-1	22568738	C(C(C(C(F)(F)Cl)(F)F)(F)F)(C(C(OC(C(F)(F)S(=O)(=O)O)(F)F)(F)F)(F)F)(F)F	InChI=1S/C8HClF16O4S/c9-5(18,19)3(14,15)1(10,11)2(12,13)4(16,17)6(20,21)29-7(22,23)8(24,25)30(26,27)28/h(H,26,27,28)	532.58	5.24	Negative	M-H	Organic acids and derivatives	Organic sulfonic acids and derivatives	Organosulfonic acids and derivatives	1	8	4	16	0	1	0	1	0	0
298	Chlorfluazuron	N-[[3,5-dichloro-4-[3-chloro-5-(trifluoromethyl)pyridin-2-yl]oxyphenyl]carbamoyl]-2,6-difluorobenzamide	C20H9Cl3F5N3O3	71422-67-8	91708	C1=CC(=C(C(=C1)F)C(=O)NC(=O)NC2=CC(=C(C(=C2)Cl)OC3=C(C=C(C=N3)C(F)(F)F)Cl)Cl)F	InChI=1S/C20H9Cl3F5N3O3/c21-10-5-9(30-19(33)31-17(32)15-13(24)2-1-3-14(15)25)6-11(22)16(10)34-18-12(23)4-8(7-29-18)20(26,27)28/h1-7H,(H2,30,31,32,33)	540.655	5.87	Negative	M-H	Benzenoids	Benzene and substituted derivatives	N-phenylureas	9	20	3	5	3	0	0	3	0	0
299	Rugulosin	8,10,14,23,25,28-hexahydroxy-6,21-dimethyloctacyclo[14.11.1.02,11.02,15.04,9.013,17.017,26.019,24]octacosa-4(9),5,7,10,19(24),20,22,25-octaene-3,12,18,27-tetrone	C30H22O10	23537-16-8	62769	CC1=CC2=C(C(=C1)O)C(=C3C(=O)C4C(C5C3(C2=O)C6C(C5C47C(=C(C8=C(C7=O)C=C(C=C8O)C)O)C6=O)O)O)O	InChI=1S/C30H22O10/c1-7-3-9-13(11(31)5-7)21(33)17-25(37)20-23(35)15-16-24(36)19(29(15,17)27(9)39)26(38)18-22(34)14-10(28(40)30(16,18)20)4-8(2)6-12(14)32/h3-6,15-16,19-20,23-24,31-36H,1-2H3	542.49	-0.31	Negative	M-H	Benzenoids	Naphthalenes	Naphthols and derivatives	22	30	10	0	0	0	0	0	0	0
300	Tetrabromobisphenol A	2,6-dibromo-4-[2-(3,5-dibromo-4-hydroxyphenyl)propan-2-yl]phenol	C15H12Br4O2	79-94-7	6618	CC(C)(C1=CC(=C(C(=C1)Br)O)Br)C2=CC(=C(C(=C2)Br)O)Br	InChI=1S/C15H12Br4O2/c1-15(2,7-3-9(16)13(20)10(17)4-7)8-5-11(18)14(21)12(19)6-8/h3-6,20-21H,1-2H3	543.871	7.2	Negative	M-H	Benzenoids	Benzene and substituted derivatives	Diphenylmethanes	12	15	2	0	0	0	0	0	4	0
301	PFNS	1,1,2,2,3,3,4,4,5,5,6,6,7,7,8,8,9,9,9-nonadecafluorononane-1-sulfonic acid	C9HF19O3S	68259-12-1	86998	C(C(C(C(C(F)(F)F)(F)F)(F)F)(F)F)(C(C(C(C(F)(F)S(=O)(=O)O)(F)F)(F)F)(F)F)(F)F	InChI=1S/C9HF19O3S/c10-1(11,2(12,13)4(16,17)6(20,21)8(24,25)26)3(14,15)5(18,19)7(22,23)9(27,28)32(29,30)31/h(H,29,30,31)	550.14	5.16	Negative	M-H	Organohalogen compounds	Alkyl halides	Alkyl fluorides	1	9	3	19	0	1	0	0	0	0
302	Aliskiren	(2S,4S,5S,7S)-5-amino-N-(3-amino-2,2-dimethyl-3-oxopropyl)-4-hydroxy-7-[[4-methoxy-3-(3-methoxypropoxy)phenyl]methyl]-8-methyl-2-propan-2-ylnonanamide	C30H53N3O6	173334-57-1	5493444	CC(C)[C@@H](CC1=CC(=C(C=C1)OC)OCCCOC)C[C@@H]([C@H](C[C@@H](C(C)C)C(=O)NCC(C)(C)C(=O)N)O)N	InChI=1S/C30H53N3O6/c1-19(2)22(14-21-10-11-26(38-8)27(15-21)39-13-9-12-37-7)16-24(31)25(34)17-23(20(3)4)28(35)33-18-30(5,6)29(32)36/h10-11,15,19-20,22-25,34H,9,12-14,16-18,31H2,1-8H3,(H2,32,36)(H,33,35)/t22-,23-,24-,25-/m0/s1	551.758	2.76	Positive	M+H	Organic acids and derivatives	Carboxylic acids and derivatives	Amino acids, peptides, and analogues	53	30	6	0	3	0	0	0	0	0
303	Perfluoroundecanoic acid	2,2,3,3,4,4,5,5,6,6,7,7,8,8,9,9,10,10,11,11,11-henicosafluoroundecanoic acid	C11HF21O2	2058-94-8	77222	C(=O)(C(C(C(C(C(C(C(C(C(C(F)(F)F)(F)F)(F)F)(F)F)(F)F)(F)F)(F)F)(F)F)(F)F)(F)F)O	InChI=1S/C11HF21O2/c12-2(13,1(33)34)3(14,15)4(16,17)5(18,19)6(20,21)7(22,23)8(24,25)9(26,27)10(28,29)11(30,31)32/h(H,33,34)	564.091	6.82	Negative	M-H	Organohalogen compounds	Alkyl halides	Alkyl fluorides	1	11	2	21	0	0	0	0	0	0
304	Fumigacin	(2Z)-2-[(4S,5S,6S,8S,9S,10R,13R,14S,16S)-6,16-diacetyloxy-4,8,10,14-tetramethyl-3,7-dioxo-5,6,9,11,12,13,15,16-octahydro-4H-cyclopenta[a]phenanthren-17-ylidene]-6-methylhept-5-enoic acid	C33H44O8	29400-42-8	3002143	C[C@H]1[C@@H]2[C@@H](C(=O)[C@]3([C@H]([C@]2(C=CC1=O)C)CC[C@@H]\4[C@@]3(C[C@@H](/C4=C(/CCC=C(C)C)\C(=O)O)OC(=O)C)C)C)OC(=O)C	InChI=1S/C33H44O8/c1-17(2)10-9-11-21(30(38)39)26-22-12-13-25-31(6)15-14-23(36)18(3)27(31)28(41-20(5)35)29(37)33(25,8)32(22,7)16-24(26)40-19(4)34/h10,14-15,18,22,24-25,27-28H,9,11-13,16H2,1-8H3,(H,38,39)/b26-21-/t18-,22+,24+,25+,27-,28+,31-,32+,33-/m1/s1	568.698	6.07	Positive	M+NH4	Lipids and lipid-like molecules	Steroids and steroid derivatives	Steroid esters	44	33	8	0	0	0	0	0	0	0
305	N-CMAmP-6:2FOSA	2-[dimethyl-[3-(3,3,4,4,5,5,6,6,7,7,8,8,8-tridecafluorooctylsulfonylamino)propyl]azaniumyl]acetate	C15H19F13N2O4S	34455-29-3	118691	C[N+](C)(CCCNS(=O)(=O)CCC(C(C(C(C(C(F)(F)F)(F)F)(F)F)(F)F)(F)F)(F)F)CC(=O)[O-]	InChI=1S/C15H19F13N2O4S/c1-30(2,8-9(31)32)6-3-5-29-35(33,34)7-4-10(16,17)11(18,19)12(20,21)13(22,23)14(24,25)15(26,27)28/h29H,3-8H2,1-2H3	570.4	2.9	Positive	M+H	Organic acids and derivatives	Carboxylic acids and derivatives	Amino acids, peptides, and analogues	19	15	4	13	2	1	0	0	0	0
306	N-MeFOSAA	2-[1,1,2,2,3,3,4,4,5,5,6,6,7,7,8,8,8-heptadecafluorooctylsulfonyl(methyl)amino]acetic acid	C11H6F17NO4S	2355-31-9	22286931	CN(CC(=O)O)S(=O)(=O)C(C(C(C(C(C(C(C(F)(F)F)(F)F)(F)F)(F)F)(F)F)(F)F)(F)F)(F)F	InChI=1S/C11H6F17NO4S/c1-29(2-3(30)31)34(32,33)11(27,28)9(22,23)7(18,19)5(14,15)4(12,13)6(16,17)8(20,21)10(24,25)26/h2H2,1H3,(H,30,31)	571.21	5.73	Negative	M-H	Organohalogen compounds	Alkyl halides	Alkyl fluorides	6	11	4	17	1	1	0	0	0	0
307	2,2-Bis(chloromethyl)-1,3-propanediyl tetrakis(2-chloroethyl) bis(phosphate)	[2-[bis(2-chloroethoxy)phosphoryloxymethyl]-3-chloro-2-(chloromethyl)propyl] bis(2-chloroethyl) phosphate	C13H24Cl6O8P2	38051-10-4	92310	C(CCl)OP(=O)(OCCCl)OCC(COP(=O)(OCCCl)OCCCl)(CCl)CCl	InChI=1S/C13H24Cl6O8P2/c14-1-5-22-28(20,23-6-2-15)26-11-13(9-18,10-19)12-27-29(21,24-7-3-16)25-8-4-17/h1-12H2	582.99	3.31	Positive	M+H	Organic acids and derivatives	Organic phosphoric acids and derivatives	Phosphate esters	24	13	8	0	0	0	2	6	0	0
308	N-EtFOSAA	2-[ethyl(1,1,2,2,3,3,4,4,5,5,6,6,7,7,8,8,8-heptadecafluorooctylsulfonyl)amino]acetic acid	C12H8F17NO4S	2991-50-6	18134	CCN(CC(=O)O)S(=O)(=O)C(C(C(C(C(C(C(C(F)(F)F)(F)F)(F)F)(F)F)(F)F)(F)F)(F)F)(F)F	InChI=1S/C12H8F17NO4S/c1-2-30(3-4(31)32)35(33,34)12(28,29)10(23,24)8(19,20)6(15,16)5(13,14)7(17,18)9(21,22)11(25,26)27/h2-3H2,1H3,(H,31,32)	585.24	6.22	Negative	M-H	Organohalogen compounds	Alkyl halides	Alkyl fluorides	8	12	4	17	1	1	0	0	0	0
309	Destruxin B	16-butan-2-yl-10,11,14-trimethyl-3-(2-methylpropyl)-13-propan-2-yl-4-oxa-1,8,11,14,17-pentazabicyclo[17.3.0]docosane-2,5,9,12,15,18-hexone	C30H51N5O7	2503-26-6	428373	CCC(C)C1C(=O)N(C(C(=O)N(C(C(=O)NCCC(=O)OC(C(=O)N2CCCC2C(=O)N1)CC(C)C)C)C)C(C)C)C	InChI=1S/C30H51N5O7/c1-10-19(6)24-29(40)34(9)25(18(4)5)30(41)33(8)20(7)26(37)31-14-13-23(36)42-22(16-17(2)3)28(39)35-15-11-12-21(35)27(38)32-24/h17-22,24-25H,10-16H2,1-9H3,(H,31,37)(H,32,38)	593.755	1.33	Positive	M+H	Organic acids and derivatives	Peptidomimetics	Depsipeptides	51	30	7	0	5	0	0	0	0	0
310	FDSA	1,1,2,2,3,3,4,4,5,5,6,6,7,7,8,8,9,9,10,10,10-henicosafluorodecane-1-sulfonamide	C10H2F21NO2S		21267702	C(C(C(C(C(C(F)(F)S(=O)(=O)N)(F)F)(F)F)(F)F)(F)F)(C(C(C(C(F)(F)F)(F)F)(F)F)(F)F)(F)F	InChI=1S/C10H2F21NO2S/c11-1(12,3(15,16)5(19,20)7(23,24)9(27,28)29)2(13,14)4(17,18)6(21,22)8(25,26)10(30,31)35(32,33)34/h(H2,32,33,34)	599.16	7.14	Negative	M-H	Organohalogen compounds	Alkyl halides	Alkyl fluorides	2	10	2	21	1	1	0	0	0	0
311	PFDS	1,1,2,2,3,3,4,4,5,5,6,6,7,7,8,8,9,9,10,10,10-henicosafluorodecane-1-sulfonic acid	C10HF21O3S	335-77-3	67636	C(C(C(C(C(C(F)(F)S(=O)(=O)O)(F)F)(F)F)(F)F)(F)F)(C(C(C(C(F)(F)F)(F)F)(F)F)(F)F)(F)F	InChI=1S/C10HF21O3S/c11-1(12,3(15,16)5(19,20)7(23,24)9(27,28)29)2(13,14)4(17,18)6(21,22)8(25,26)10(30,31)35(32,33)34/h(H,32,33,34)	600.15	5.83	Negative	M-H	Organohalogen compounds	Alkyl halides	Alkyl fluorides	1	10	3	21	0	1	0	0	0	0
312	Novobiocin	[(3R,4S,5R,6R)-5-hydroxy-6-[4-hydroxy-3-[[4-hydroxy-3-(3-methylbut-2-enyl)benzoyl]amino]-8-methyl-2-oxochromen-7-yl]oxy-3-methoxy-2,2-dimethyloxan-4-yl] carbamate	C31H36N2O11	303-81-1	54675769	CC1=C(C=CC2=C1OC(=O)C(=C2O)NC(=O)C3=CC(=C(C=C3)O)CC=C(C)C)O[C@H]4[C@@H]([C@@H]([C@H](C(O4)(C)C)OC)OC(=O)N)O	InChI=1S/C31H36N2O11/c1-14(2)7-8-16-13-17(9-11-19(16)34)27(37)33-21-22(35)18-10-12-20(15(3)24(18)42-28(21)38)41-29-23(36)25(43-30(32)39)26(40-6)31(4,5)44-29/h7,9-13,23,25-26,29,34-36H,8H2,1-6H3,(H2,32,39)(H,33,37)/t23-,25+,26-,29-/m1/s1	612.624	2.45	Positive	M+H	Phenylpropanoids and polyketides	Coumarins and derivatives	Coumarin glycosides	36	31	11	0	2	0	0	0	0	0
313	Perfluorododecanoic acid	2,2,3,3,4,4,5,5,6,6,7,7,8,8,9,9,10,10,11,11,12,12,12-tricosafluorododecanoic acid	C12HF23O2	307-55-1	67545	C(=O)(C(C(C(C(C(C(C(C(C(C(C(F)(F)F)(F)F)(F)F)(F)F)(F)F)(F)F)(F)F)(F)F)(F)F)(F)F)(F)F)O	InChI=1S/C12HF23O2/c13-2(14,1(36)37)3(15,16)4(17,18)5(19,20)6(21,22)7(23,24)8(25,26)9(27,28)10(29,30)11(31,32)12(33,34)35/h(H,36,37)	614.098	7.49	Negative	M-H	Organohalogen compounds	Alkyl halides	Alkyl fluorides	1	12	2	23	0	0	0	0	0	0
314	Tetrandrine	(1S,14S)-9,20,21,25-tetramethoxy-15,30-dimethyl-7,23-dioxa-15,30-diazaheptacyclo[22.6.2.23,6.18,12.114,18.027,31.022,33]hexatriaconta-3(36),4,6(35),8,10,12(34),18,20,22(33),24,26,31-dodecaene	C38H42N2O6	518-34-3	73078	CN1CCC2=CC(=C3C=C2[C@@H]1CC4=CC=C(C=C4)OC5=C(C=CC(=C5)C[C@H]6C7=C(O3)C(=C(C=C7CCN6C)OC)OC)OC)OC	InChI=1S/C38H42N2O6/c1-39-15-13-25-20-32(42-4)34-22-28(25)29(39)17-23-7-10-27(11-8-23)45-33-19-24(9-12-31(33)41-3)18-30-36-26(14-16-40(30)2)21-35(43-5)37(44-6)38(36)46-34/h7-12,19-22,29-30H,13-18H2,1-6H3/t29-,30-/m0/s1	622.75	7.65	Positive	[M+H]/2	Lignans, neolignans and related compounds	Lignans, neolignans and related compounds	Not avaliable	42	38	6	0	2	0	0	0	0	0
315	Rafoxanide	N-[3-chloro-4-(4-chlorophenoxy)phenyl]-2-hydroxy-3,5-diiodobenzamide	C19H11Cl2I2NO3	22662-39-1	31475	C1=CC(=CC=C1OC2=C(C=C(C=C2)NC(=O)C3=C(C(=CC(=C3)I)I)O)Cl)Cl	InChI=1S/C19H11Cl2I2NO3/c20-10-1-4-13(5-2-10)27-17-6-3-12(9-15(17)21)24-19(26)14-7-11(22)8-16(23)18(14)25/h1-9,25H,(H,24,26)	626.01	8.14	Negative	M-H	Benzenoids	Benzene and substituted derivatives	Anilides	11	19	3	0	1	0	0	2	0	2
316	Dabigatran etexilate	ethyl 3-[[2-[[4-(N-hexoxycarbonylcarbamimidoyl)anilino]methyl]-1-methylbenzimidazole-5-carbonyl]-pyridin-2-ylamino]propanoate	C34H41N7O5	1610666-09-5	135565674	CCCCCCOC(=O)NC(=N)C1=CC=C(C=C1)NCC2=NC3=C(N2C)C=CC(=C3)C(=O)N(CCC(=O)OCC)C4=CC=CC=N4	InChI=1S/C34H41N7O5/c1-4-6-7-10-21-46-34(44)39-32(35)24-12-15-26(16-13-24)37-23-30-38-27-22-25(14-17-28(27)40(30)3)33(43)41(20-18-31(42)45-5-2)29-11-8-9-19-36-29/h8-9,11-17,19,22,37H,4-7,10,18,20-21,23H2,1-3H3,(H2,35,39,44)	627.733	5.08	Positive	M+H	Organoheterocyclic compounds	Benzimidazoles	Not avaliable	41	34	5	0	7	0	0	0	0	0
317	10:2FTS	3,3,4,4,5,5,6,6,7,7,8,8,9,9,10,10,11,11,12,12,12-henicosafluorododecane-1-sulfonic acid	C12H5F21O3S	120226-60-0	23136180	C(CS(=O)(=O)O)C(C(C(C(C(C(C(C(C(C(F)(F)F)(F)F)(F)F)(F)F)(F)F)(F)F)(F)F)(F)F)(F)F)(F)F	InChI=1S/C12H5F21O3S/c13-3(14,1-2-37(34,35)36)4(15,16)5(17,18)6(19,20)7(21,22)8(23,24)9(25,26)10(27,28)11(29,30)12(31,32)33/h1-2H2,(H,34,35,36)	628.2	5.34	Negative	M-H	Organic acids and derivatives	Organic sulfonic acids and derivatives	Organosulfonic acids and derivatives	5	12	3	21	0	1	0	0	0	0
318	8:2ClPFAES	2-(8-chloro-1,1,2,2,3,3,4,4,5,5,6,6,7,7,8,8-hexadecafluorooctoxy)-1,1,2,2-tetrafluoroethanesulfonic acid	C10HClF20O4S	763051-92-9	15099039	C(C(C(C(C(F)(F)Cl)(F)F)(F)F)(F)F)(C(C(C(OC(C(F)(F)S(=O)(=O)O)(F)F)(F)F)(F)F)(F)F)(F)F	InChI=1S/C10HClF20O4S/c11-7(24,25)5(20,21)3(16,17)1(12,13)2(14,15)4(18,19)6(22,23)8(26,27)35-9(28,29)10(30,31)36(32,33)34/h(H,32,33,34)	632.6	6.58	Negative	M-H	Organic acids and derivatives	Organic sulfonic acids and derivatives	Organosulfonic acids and derivatives	1	10	4	20	0	1	0	1	0	0
319	Acarbose	(3R,4R,5S,6R)-5-[(2R,3R,4R,5S,6R)-5-[(2R,3R,4S,5S,6R)-3,4-dihydroxy-6-methyl-5-[[(1S,4R,5S,6S)-4,5,6-trihydroxy-3-(hydroxymethyl)cyclohex-2-en-1-yl]amino]oxan-2-yl]oxy-3,4-dihydroxy-6-(hydroxymethyl)oxan-2-yl]oxy-6-(hydroxymethyl)oxane-2,3,4-triol	C25H43NO18	56180-94-0	41774	C[C@@H]1[C@H]([C@@H]([C@H]([C@H](O1)O[C@@H]2[C@H](O[C@@H]([C@@H]([C@H]2O)O)O[C@@H]3[C@H](OC([C@@H]([C@H]3O)O)O)CO)CO)O)O)N[C@H]4C=C([C@H]([C@@H]([C@H]4O)O)O)CO	InChI=1S/C25H43NO18/c1-6-11(26-8-2-7(3-27)12(30)15(33)13(8)31)14(32)19(37)24(40-6)43-22-10(5-29)42-25(20(38)17(22)35)44-21-9(4-28)41-23(39)18(36)16(21)34/h2,6,8-39H,3-5H2,1H3/t6-,8+,9-,10-,11-,12-,13+,14+,15+,16-,17-,18-,19-,20-,21-,22-,23?,24-,25-/m1/s1	645.605	-8.08	Positive	M+H	Organic oxygen compounds	Organooxygen compounds	Carbohydrates and carbohydrate conjugates	43	25	18	0	1	0	0	0	0	0
320	Perfluorotridecanoic acid	2,2,3,3,4,4,5,5,6,6,7,7,8,8,9,9,10,10,11,11,12,12,13,13,13-pentacosafluorotridecanoic acid	C13HF25O2	72629-94-8	3018355	C(=O)(C(C(C(C(C(C(C(C(C(C(C(C(F)(F)F)(F)F)(F)F)(F)F)(F)F)(F)F)(F)F)(F)F)(F)F)(F)F)(F)F)(F)F)O	InChI=1S/C13HF25O2/c14-2(15,1(39)40)3(16,17)4(18,19)5(20,21)6(22,23)7(24,25)8(26,27)9(28,29)10(30,31)11(32,33)12(34,35)13(36,37)38/h(H,39,40)	664.106	8.16	Negative	M-H	Lipids and lipid-like molecules	Fatty Acyls	Fatty acids and conjugates	1	13	2	25	0	0	0	0	0	0
321	Tralomethrin (peak3)	[cyano-(3-phenoxyphenyl)methyl] 2,2-dimethyl-3-(1,2,2,2-tetrabromoethyl)cyclopropane-1-carboxylate	C22H19Br4NO3	66841-25-6	9809914	CC1(C(C1C(=O)OC(C#N)C2=CC(=CC=C2)OC3=CC=CC=C3)C(C(Br)(Br)Br)Br)C	InChI=1S/C22H19Br4NO3/c1-21(2)17(19(23)22(24,25)26)18(21)20(28)30-16(12-27)13-7-6-10-15(11-13)29-14-8-4-3-5-9-14/h3-11,16-19H,1-2H3	665.007	7.56	Positive	M+NH4	Lipids and lipid-like molecules	Fatty Acyls	Fatty acid esters	19	22	3	0	1	0	0	0	4	0
322	Icariin	5-hydroxy-2-(4-methoxyphenyl)-8-(3-methylbut-2-enyl)-7-[(2S,3R,4S,5S,6R)-3,4,5-trihydroxy-6-(hydroxymethyl)oxan-2-yl]oxy-3-[(2S,3R,4R,5R,6S)-3,4,5-trihydroxy-6-methyloxan-2-yl]oxychromen-4-one	C33H40O15	489-32-7	5318997	C[C@H]1[C@@H]([C@H]([C@H]([C@@H](O1)OC2=C(OC3=C(C2=O)C(=CC(=C3CC=C(C)C)O[C@H]4[C@@H]([C@H]([C@@H]([C@H](O4)CO)O)O)O)O)C5=CC=C(C=C5)OC)O)O)O	InChI=1S/C33H40O15/c1-13(2)5-10-17-19(45-33-28(42)26(40)23(37)20(12-34)46-33)11-18(35)21-24(38)31(48-32-27(41)25(39)22(36)14(3)44-32)29(47-30(17)21)15-6-8-16(43-4)9-7-15/h5-9,11,14,20,22-23,25-28,32-37,39-42H,10,12H2,1-4H3/t14-,20+,22-,23+,25+,26-,27+,28+,32-,33+/m0/s1	676.662	0.46	Positive	M+H	Phenylpropanoids and polyketides	Flavonoids	Flavonoid glycosides	40	33	15	0	0	0	0	0	0	0
323	Tris(2,3-dibromopropyl) phosphate	tris(2,3-dibromopropyl) phosphate	C9H15Br6O4P	126-72-7	31356	C(C(CBr)Br)OP(=O)(OCC(CBr)Br)OCC(CBr)Br	InChI=1S/C9H15Br6O4P/c10-1-7(13)4-17-20(16,18-5-8(14)2-11)19-6-9(15)3-12/h7-9H,1-6H2	697.611	4.19	Positive	M+H	Organic acids and derivatives	Organic phosphoric acids and derivatives	Phosphate esters	15	9	4	0	0	0	1	0	6	0
324	PFDoS	1,1,2,2,3,3,4,4,5,5,6,6,7,7,8,8,9,9,10,10,11,11,12,12,12-pentacosafluorododecane-1-sulfonic acid	C12HF25O3S	79780-39-5	3018866	C(C(C(C(C(C(C(F)(F)S(=O)(=O)O)(F)F)(F)F)(F)F)(F)F)(F)F)(C(C(C(C(C(F)(F)F)(F)F)(F)F)(F)F)(F)F)(F)F	InChI=1S/C12HF25O3S/c13-1(14,3(17,18)5(21,22)7(25,26)9(29,30)11(33,34)35)2(15,16)4(19,20)6(23,24)8(27,28)10(31,32)12(36,37)41(38,39)40/h(H,38,39,40)	700.16	7.17	Negative	M-H	Organohalogen compounds	Alkyl halides	Alkyl fluorides	1	12	3	25	0	1	0	0	0	0
325	Perfluorotetradecanoic acid	2,2,3,3,4,4,5,5,6,6,7,7,8,8,9,9,10,10,11,11,12,12,13,13,14,14,14-heptacosafluorotetradecanoic acid	C14HF27O2	376-06-7	67822	C(=O)(C(C(C(C(C(C(C(C(C(C(C(C(C(F)(F)F)(F)F)(F)F)(F)F)(F)F)(F)F)(F)F)(F)F)(F)F)(F)F)(F)F)(F)F)(F)F)O	InChI=1S/C14HF27O2/c15-2(16,1(42)43)3(17,18)4(19,20)5(21,22)6(23,24)7(25,26)8(27,28)9(29,30)10(31,32)11(33,34)12(35,36)13(37,38)14(39,40)41/h(H,42,43)	714.114	8.83	Negative	M-H	Lipids and lipid-like molecules	Fatty Acyls	Fatty acids and conjugates	1	14	2	27	0	0	0	0	0	0
326	Ritonavir	1,3-thiazol-5-ylmethyl N-[(2S,3S,5S)-3-hydroxy-5-[[(2S)-3-methyl-2-[[methyl-[(2-propan-2-yl-1,3-thiazol-4-yl)methyl]carbamoyl]amino]butanoyl]amino]-1,6-diphenylhexan-2-yl]carbamate	C37H48N6O5S2	155213-67-5	392622	CC(C)C1=NC(=CS1)CN(C)C(=O)N[C@@H](C(C)C)C(=O)N[C@@H](CC2=CC=CC=C2)C[C@@H]([C@H](CC3=CC=CC=C3)NC(=O)OCC4=CN=CS4)O	InChI=1S/C37H48N6O5S2/c1-24(2)33(42-36(46)43(5)20-29-22-49-35(40-29)25(3)4)34(45)39-28(16-26-12-8-6-9-13-26)18-32(44)31(17-27-14-10-7-11-15-27)41-37(47)48-21-30-19-38-23-50-30/h6-15,19,22-25,28,31-33,44H,16-18,20-21H2,1-5H3,(H,39,45)(H,41,47)(H,42,46)/t28-,31-,32-,33-/m0/s1	720.944	6.27	Positive	M+H	Organic acids and derivatives	Carboxylic acids and derivatives	Amino acids, peptides, and analogues	48	37	5	0	6	2	0	0	0	0
327	Spinosyn A	(1S,2R,5S,7R,9R,10S,14R,15S,19S)-15-[(2R,5S,6R)-5-(dimethylamino)-6-methyloxan-2-yl]oxy-19-ethyl-14-methyl-7-[(2R,3R,4R,5S,6S)-3,4,5-trimethoxy-6-methyloxan-2-yl]oxy-20-oxatetracyclo[10.10.0.02,10.05,9]docosa-3,11-diene-13,21-dione	C41H65NO10	131929-60-7	443059	CC[C@H]1CCC[C@@H]([C@H](C(=O)C2=C[C@H]3[C@@H]4C[C@@H](C[C@H]4C=C[C@H]3[C@@H]2CC(=O)O1)O[C@H]5[C@@H]([C@@H]([C@H]([C@@H](O5)C)OC)OC)OC)C)O[C@H]6CC[C@@H]([C@H](O6)C)N(C)C	InChI=1S/C41H65NO10/c1-10-26-12-11-13-34(52-36-17-16-33(42(5)6)23(3)48-36)22(2)37(44)32-20-30-28(31(32)21-35(43)50-26)15-14-25-18-27(19-29(25)30)51-41-40(47-9)39(46-8)38(45-7)24(4)49-41/h14-15,20,22-31,33-34,36,38-41H,10-13,16-19,21H2,1-9H3/t22-,23-,24+,25-,26+,27-,28-,29-,30-,31+,33+,34+,36+,38+,39-,40-,41+/m1/s1	731.956	3.3	Positive	M+H	Organic oxygen compounds	Organooxygen compounds	Carbohydrates and carbohydrate conjugates	65	41	10	0	1	0	0	0	0	0
328	Erythromycin	(3R,4S,5S,6R,7R,9R,11R,12R,13S,14R)-6-[(2S,3R,4S,6R)-4-(dimethylamino)-3-hydroxy-6-methyloxan-2-yl]oxy-14-ethyl-7,12,13-trihydroxy-4-[(2R,4R,5S,6S)-5-hydroxy-4-methoxy-4,6-dimethyloxan-2-yl]oxy-3,5,7,9,11,13-hexamethyl-oxacyclotetradecane-2,10-dione	C37H67NO13	114-07-8	12560	CC[C@@H]1[C@@]([C@@H]([C@H](C(=O)[C@@H](C[C@@]([C@@H]([C@H]([C@@H]([C@H](C(=O)O1)C)O[C@H]2C[C@@]([C@H]([C@@H](O2)C)O)(C)OC)C)O[C@H]3[C@@H]([C@H](C[C@H](O3)C)N(C)C)O)(C)O)C)C)O)(C)O	InChI=1S/C37H67NO13/c1-14-25-37(10,45)30(41)20(4)27(39)18(2)16-35(8,44)32(51-34-28(40)24(38(11)12)15-19(3)47-34)21(5)29(22(6)33(43)49-25)50-26-17-36(9,46-13)31(42)23(7)48-26/h18-26,28-32,34,40-42,44-45H,14-17H2,1-13H3/t18-,19-,20+,21+,22-,23+,24+,25-,26+,28-,29+,30-,31+,32-,34+,35-,36-,37-/m1/s1	733.927	2.48	Positive	M+H	Organic oxygen compounds	Organooxygen compounds	Carbohydrates and carbohydrate conjugates	67	37	13	0	1	0	0	0	0	0
329	Clarithromycin	(3R,4S,5S,6R,7R,9R,11R,12R,13S,14R)-6-[(2S,3R,4S,6R)-4-(dimethylamino)-3-hydroxy-6-methyloxan-2-yl]oxy-14-ethyl-12,13-dihydroxy-4-[(2R,4R,5S,6S)-5-hydroxy-4-methoxy-4,6-dimethyloxan-2-yl]oxy-7-methoxy-3,5,7,9,11,13-hexamethyl-oxacyclotetradecane-2,10-dione	C38H69NO13	81103-11-9	84029	CC[C@@H]1[C@@]([C@@H]([C@H](C(=O)[C@@H](C[C@@]([C@@H]([C@H]([C@@H]([C@H](C(=O)O1)C)O[C@H]2C[C@@]([C@H]([C@@H](O2)C)O)(C)OC)C)O[C@H]3[C@@H]([C@H](C[C@H](O3)C)N(C)C)O)(C)OC)C)C)O)(C)O	InChI=1S/C38H69NO13/c1-15-26-38(10,45)31(42)21(4)28(40)19(2)17-37(9,47-14)33(52-35-29(41)25(39(11)12)16-20(3)48-35)22(5)30(23(6)34(44)50-26)51-27-18-36(8,46-13)32(43)24(7)49-27/h19-27,29-33,35,41-43,45H,15-18H2,1-14H3/t19-,20-,21+,22+,23-,24+,25+,26-,27+,29-,30+,31-,32+,33-,35+,36-,37-,38-/m1/s1	747.953	3.18	Positive	M+H	Organic oxygen compounds	Organooxygen compounds	Carbohydrates and carbohydrate conjugates	69	38	13	0	1	0	0	0	0	0
330	Azithromycin	(2R,3S,4R,5R,8R,10R,11R,12S,13S,14R)-11-[(2S,3R,4S,6R)-4-(dimethylamino)-3-hydroxy-6-methyloxan-2-yl]oxy-2-ethyl-3,4,10-trihydroxy-13-[(2R,4R,5S,6S)-5-hydroxy-4-methoxy-4,6-dimethyloxan-2-yl]oxy-3,5,6,8,10,12,14-heptamethyl-1-oxa-6-azacyclopentadecan-15-one	C38H72N2O12	83905-01-5	447043	CC[C@@H]1[C@@]([C@@H]([C@H](N(C[C@@H](C[C@@]([C@@H]([C@H]([C@@H]([C@H](C(=O)O1)C)O[C@H]2C[C@@]([C@H]([C@@H](O2)C)O)(C)OC)C)O[C@H]3[C@@H]([C@H](C[C@H](O3)C)N(C)C)O)(C)O)C)C)C)O)(C)O	InChI=1S/C38H72N2O12/c1-15-27-38(10,46)31(42)24(6)40(13)19-20(2)17-36(8,45)33(52-35-29(41)26(39(11)12)16-21(3)48-35)22(4)30(23(5)34(44)50-27)51-28-18-37(9,47-14)32(43)25(7)49-28/h20-33,35,41-43,45-46H,15-19H2,1-14H3/t20-,21-,22+,23-,24-,25+,26+,27-,28+,29-,30+,31-,32+,33-,35+,36-,37-,38-/m1/s1	748.985	3.24	Positive	M+H	Organic oxygen compounds	Organooxygen compounds	Carbohydrates and carbohydrate conjugates	72	38	12	0	2	0	0	0	0	0
331	Narasin	(2R)-2-[(2R,3S,5S,6R)-6-[(2S,3S,4S,6R)-6-[(3S,5S,7R,9S,10S,12R,15R)-3-[(2R,5R,6S)-5-ethyl-5-hydroxy-6-methyloxan-2-yl]-15-hydroxy-3,10,12-trimethyl-4,6,8-trioxadispiro[4.1.57.35]pentadec-13-en-9-yl]-3-hydroxy-4-methyl-5-oxooctan-2-yl]-3,5-dimethyloxan-2-yl]butanoic acid	C43H72O11	55134-13-9	65452	CC[C@H]([C@H]1[C@H](C[C@@H]([C@@H](O1)[C@@H](C)[C@@H]([C@H](C)C(=O)[C@H](CC)[C@@H]2[C@H](C[C@H]([C@]3(O2)C=C[C@H]([C@@]4(O3)CC[C@@](O4)(C)[C@H]5CC[C@@]([C@@H](O5)C)(CC)O)O)C)C)O)C)C)C(=O)O	InChI=1S/C43H72O11/c1-12-30(35(46)27(8)34(45)28(9)36-23(4)21-24(5)37(51-36)31(13-2)39(47)48)38-25(6)22-26(7)42(52-38)18-15-32(44)43(54-42)20-19-40(11,53-43)33-16-17-41(49,14-3)29(10)50-33/h15,18,23-34,36-38,44-45,49H,12-14,16-17,19-22H2,1-11H3,(H,47,48)/t23-,24-,25-,26+,27-,28-,29-,30-,31+,32+,33+,34+,36+,37+,38-,40-,41+,42-,43-/m0/s1	765.025	8.94	Positive	M+NH4	Lipids and lipid-like molecules	Prenol lipids	Terpene glycosides	72	43	11	0	0	0	0	0	0	0
332	PFHxDA	2,2,3,3,4,4,5,5,6,6,7,7,8,8,9,9,10,10,11,11,12,12,13,13,14,14,15,15,16,16,16-hentriacontafluorohexadecanoic acid	C16HF31O2	67905-19-5	106027	C(=O)(C(C(C(C(C(C(C(C(C(C(C(C(C(C(C(F)(F)F)(F)F)(F)F)(F)F)(F)F)(F)F)(F)F)(F)F)(F)F)(F)F)(F)F)(F)F)(F)F)(F)F)(F)F)O	InChI=1S/C16HF31O2/c17-2(18,1(48)49)3(19,20)4(21,22)5(23,24)6(25,26)7(27,28)8(29,30)9(31,32)10(33,34)11(35,36)12(37,38)13(39,40)14(41,42)15(43,44)16(45,46)47/h(H,48,49)	814.13	10.17	Negative	M-H	Lipids and lipid-like molecules	Fatty Acyls	Fatty acids and conjugates	1	16	2	31	0	0	0	0	0	0
333	Glycyrrhizic acid	(2S,3S,4S,5R,6R)-6-[(2S,3R,4S,5S,6S)-2-[[(3S,4aR,6aR,6bS,8aS,11S,12aR,14aR,14bS)-11-carboxy-4,4,6a,6b,8a,11,14b-heptamethyl-14-oxo-2,3,4a,5,6,7,8,9,10,12,12a,14a-dodecahydro-1H-picen-3-yl]oxy]-6-carboxy-4,5-dihydroxyoxan-3-yl]oxy-3,4,5-trihydroxyoxane-2-carboxylic acid	C42H62O16	1405-86-3	14982	C[C@]12CC[C@](C[C@H]1C3=CC(=O)[C@@H]4[C@]5(CC[C@@H](C([C@@H]5CC[C@]4([C@@]3(CC2)C)C)(C)C)O[C@@H]6[C@@H]([C@H]([C@@H]([C@H](O6)C(=O)O)O)O)O[C@H]7[C@@H]([C@H]([C@@H]([C@H](O7)C(=O)O)O)O)O)C)(C)C(=O)O	InChI=1S/C42H62O16/c1-37(2)21-8-11-42(7)31(20(43)16-18-19-17-39(4,36(53)54)13-12-38(19,3)14-15-41(18,42)6)40(21,5)10-9-22(37)55-35-30(26(47)25(46)29(57-35)33(51)52)58-34-27(48)23(44)24(45)28(56-34)32(49)50/h16,19,21-31,34-35,44-48H,8-15,17H2,1-7H3,(H,49,50)(H,51,52)(H,53,54)/t19-,21-,22-,23-,24-,25-,26-,27+,28-,29-,30+,31+,34-,35-,38+,39-,40-,41+,42+/m0/s1	822.932	3.19	Positive	M+H	Lipids and lipid-like molecules	Prenol lipids	Terpene glycosides	62	42	16	0	0	0	0	0	0	0
334	Roxithromycin	(3R,4S,5S,6R,7R,9R,10Z,11S,12R,13S,14R)-6-[(2S,3R,4S,6R)-4-(dimethylamino)-3-hydroxy-6-methyloxan-2-yl]oxy-14-ethyl-7,12,13-trihydroxy-4-[(2R,4R,5S,6S)-5-hydroxy-4-methoxy-4,6-dimethyloxan-2-yl]oxy-10-(2-methoxyethoxymethoxyimino)-3,5,7,9,11,13-hexamethyl-oxacyclotetradecan-2-one	C41H76N2O15	80214-83-1	5480431	CC[C@@H]1[C@@]([C@@H]([C@H](/C(=N/OCOCCOC)/[C@@H](C[C@@]([C@@H]([C@H]([C@@H]([C@H](C(=O)O1)C)O[C@H]2C[C@@]([C@H]([C@@H](O2)C)O)(C)OC)C)O[C@H]3[C@@H]([C@H](C[C@H](O3)C)N(C)C)O)(C)O)C)C)O)(C)O	InChI=1S/C41H76N2O15/c1-15-29-41(10,49)34(45)24(4)31(42-53-21-52-17-16-50-13)22(2)19-39(8,48)36(58-38-32(44)28(43(11)12)18-23(3)54-38)25(5)33(26(6)37(47)56-29)57-30-20-40(9,51-14)35(46)27(7)55-30/h22-30,32-36,38,44-46,48-49H,15-21H2,1-14H3/b42-31-/t22-,23-,24+,25+,26-,27+,28+,29-,30+,32-,33+,34-,35+,36-,38+,39-,40-,41-/m1/s1	837.047	2.75	Positive	M+H	Organic oxygen compounds	Organooxygen compounds	Carbohydrates and carbohydrate conjugates	76	41	15	0	2	0	0	0	0	0
335	Spiramycin	2-[(4R,5S,6S,7R,9R,10R,11E,13E,16R)-6-[5-(4,5-dihydroxy-4,6-dimethyloxan-2-yl)oxy-4-(dimethylamino)-3-hydroxy-6-methyloxan-2-yl]oxy-10-[5-(dimethylamino)-6-methyloxan-2-yl]oxy-4-hydroxy-5-methoxy-9,16-dimethyl-2-oxo-1-oxacyclohexadeca-11,13-dien-7-yl]acetaldehyde	C43H74N2O14	8025-81-8	6419898	C[C@@H]1C/C=C/C=C/[C@@H]([C@@H](C[C@@H]([C@@H]([C@H]([C@@H](CC(=O)O1)O)OC)OC2C(C(C(C(O2)C)OC3CC(C(C(O3)C)O)(C)O)N(C)C)O)CC=O)C)OC4CCC(C(O4)C)N(C)C	InChI=1S/C43H74N2O14/c1-24-21-29(19-20-46)39(59-42-37(49)36(45(9)10)38(27(4)56-42)58-35-23-43(6,51)41(50)28(5)55-35)40(52-11)31(47)22-33(48)53-25(2)15-13-12-14-16-32(24)57-34-18-17-30(44(7)8)26(3)54-34/h12-14,16,20,24-32,34-42,47,49-51H,15,17-19,21-23H2,1-11H3/b13-12+,16-14+/t24-,25-,26?,27?,28?,29+,30?,31-,32+,34?,35?,36?,37?,38?,39+,40+,41?,42?,43?/m1/s1	843.053	1.87	Positive	M+H	Organic oxygen compounds	Organooxygen compounds	Carbohydrates and carbohydrate conjugates	74	43	14	0	2	0	0	0	0	0
336	Tilmicosin	(4R,5S,6S,7R,9R,11E,13E,15R,16R)-6-[(2R,3R,4S,5S,6R)-4-(dimethylamino)-3,5-dihydroxy-6-methyloxan-2-yl]oxy-7-[2-[(3R,5S)-3,5-dimethylpiperidin-1-yl]ethyl]-16-ethyl-4-hydroxy-15-[[(2R,3R,4R,5R,6R)-5-hydroxy-3,4-dimethoxy-6-methyloxan-2-yl]oxymethyl]-5,9,13-trimethyl-1-oxacyclohexadeca-11,13-diene-2,10-dione	C46H80N2O13	108050-54-0	5282521	CC[C@@H]1[C@H](/C=C(/C=C/C(=O)[C@@H](C[C@@H]([C@@H]([C@H]([C@@H](CC(=O)O1)O)C)O[C@H]2[C@@H]([C@H]([C@@H]([C@H](O2)C)O)N(C)C)O)CCN3C[C@@H](C[C@@H](C3)C)C)C)\C)CO[C@H]4[C@@H]([C@@H]([C@@H]([C@H](O4)C)O)OC)OC	InChI=1S/C46H80N2O13/c1-13-36-33(24-57-46-44(56-12)43(55-11)40(53)31(8)59-46)19-25(2)14-15-34(49)28(5)20-32(16-17-48-22-26(3)18-27(4)23-48)42(29(6)35(50)21-37(51)60-36)61-45-41(54)38(47(9)10)39(52)30(7)58-45/h14-15,19,26-33,35-36,38-46,50,52-54H,13,16-18,20-24H2,1-12H3/b15-14+,25-19+/t26-,27+,28-,29+,30-,31-,32+,33-,35-,36-,38+,39-,40-,41-,42-,43-,44-,45+,46-/m1/s1	869.133	4.13	Positive	M+H	Organic oxygen compounds	Organooxygen compounds	Carbohydrates and carbohydrate conjugates	80	46	13	0	2	0	0	0	0	0
337	PFOcDA	2,2,3,3,4,4,5,5,6,6,7,7,8,8,9,9,10,10,11,11,12,12,13,13,14,14,15,15,16,16,17,17,18,18,18-pentatriacontafluorooctadecanoic acid	C18HF35O2	16517-11-6	167547	C(=O)(C(C(C(C(C(C(C(C(C(C(C(C(C(C(C(C(C(F)(F)F)(F)F)(F)F)(F)F)(F)F)(F)F)(F)F)(F)F)(F)F)(F)F)(F)F)(F)F)(F)F)(F)F)(F)F)(F)F)(F)F)O	InChI=1S/C18HF35O2/c19-2(20,1(54)55)3(21,22)4(23,24)5(25,26)6(27,28)7(29,30)8(31,32)9(33,34)10(35,36)11(37,38)12(39,40)13(41,42)14(43,44)15(45,46)16(47,48)17(49,50)18(51,52)53/h(H,54,55)	914.1	11.51	Negative	M-H	Lipids and lipid-like molecules	Fatty Acyls	Fatty acids and conjugates	1	18	2	35	0	0	0	0	0	0
338	Tylosin	2-[(4R,5S,6S,7R,9R,11E,13E,15R,16R)-6-[(2R,3R,4R,5S,6R)-5-[(2S,4R,5S,6S)-4,5-dihydroxy-4,6-dimethyloxan-2-yl]oxy-4-(dimethylamino)-3-hydroxy-6-methyloxan-2-yl]oxy-16-ethyl-4-hydroxy-15-[[(2R,3R,4R,5R,6R)-5-hydroxy-3,4-dimethoxy-6-methyloxan-2-yl]oxymethyl]-5,9,13-trimethyl-2,10-dioxo-1-oxacyclohexadeca-11,13-dien-7-yl]acetaldehyde	C46H77NO17	1401-69-0	5280440	CC[C@@H]1[C@H](/C=C(/C=C/C(=O)[C@@H](C[C@@H]([C@@H]([C@H]([C@@H](CC(=O)O1)O)C)O[C@H]2[C@@H]([C@H]([C@@H]([C@H](O2)C)O[C@H]3C[C@@]([C@H]([C@@H](O3)C)O)(C)O)N(C)C)O)CC=O)C)\C)CO[C@H]4[C@@H]([C@@H]([C@@H]([C@H](O4)C)O)OC)OC	InChI=1S/C46H77NO17/c1-13-33-30(22-58-45-42(57-12)41(56-11)37(52)26(5)60-45)18-23(2)14-15-31(49)24(3)19-29(16-17-48)39(25(4)32(50)20-34(51)62-33)64-44-38(53)36(47(9)10)40(27(6)61-44)63-35-21-46(8,55)43(54)28(7)59-35/h14-15,17-18,24-30,32-33,35-45,50,52-55H,13,16,19-22H2,1-12H3/b15-14+,23-18+/t24-,25+,26-,27-,28+,29+,30-,32-,33-,35+,36-,37-,38-,39-,40-,41-,42-,43+,44+,45-,46-/m1/s1	916.1	3.27	Positive	M+H	Organic oxygen compounds	Organooxygen compounds	Carbohydrates and carbohydrate conjugates	77	46	17	0	1	0	0	0	0	0
339	Tris(1,1,3-tribromo-2,2-dimethylpropyl) phosphate	tris(1,1,3-tribromo-2,2-dimethylpropyl) phosphate	C15H24Br9O4P	134376-16-2	19432134	CC(C)(CBr)C(OP(=O)(OC(C(C)(C)CBr)(Br)Br)OC(C(C)(C)CBr)(Br)Br)(Br)Br	InChI=1S/C15H24Br9O4P/c1-10(2,7-16)13(19,20)26-29(25,27-14(21,22)11(3,4)8-17)28-15(23,24)12(5,6)9-18/h7-9H2,1-6H3	1018.46	9.83	Positive	M+H	Organic acids and derivatives	Organic phosphoric acids and derivatives	Phosphate esters	24	15	4	0	0	0	1	0	9	0
340	Valinomycin	6,18,30-trimethyl-3,9,12,15,21,24,27,33,36-nona(propan-2-yl)-1,7,13,19,25,31-hexaoxa-4,10,16,22,28,34-hexazacyclohexatriacontane-2,5,8,11,14,17,20,23,26,29,32,35-dodecone	C54H90N6O18	2001-95-8	5649	CC1C(=O)NC(C(=O)OC(C(=O)NC(C(=O)OC(C(=O)NC(C(=O)OC(C(=O)NC(C(=O)OC(C(=O)NC(C(=O)OC(C(=O)NC(C(=O)O1)C(C)C)C(C)C)C(C)C)C)C(C)C)C(C)C)C(C)C)C)C(C)C)C(C)C)C(C)C	InChI=1S/C54H90N6O18/c1-22(2)34-49(67)73-31(19)43(61)55-38(26(9)10)53(71)77-41(29(15)16)47(65)59-36(24(5)6)51(69)75-33(21)45(63)57-39(27(11)12)54(72)78-42(30(17)18)48(66)60-35(23(3)4)50(68)74-32(20)44(62)56-37(25(7)8)52(70)76-40(28(13)14)46(64)58-34/h22-42H,1-21H3,(H,55,61)(H,56,62)(H,57,63)(H,58,64)(H,59,65)(H,60,66)	1111.32	4.49	Positive	M+NH4	Organic acids and derivatives	Peptidomimetics	Depsipeptides	90	54	18	0	6	0	0	0	0	0
341	Vitamin B12	cobalt(3+);[5-(5,6-dimethylbenzimidazol-1-yl)-4-hydroxy-2-(hydroxymethyl)oxolan-3-yl] 1-[3-[2,13,18-tris(2-amino-2-oxoethyl)-7,12,17-tris(3-amino-3-oxopropyl)-3,5,8,8,13,15,18,19-octamethyl-2,7,12,17-tetrahydro-1H-corrin-21-id-3-yl]propanoylamino]propan-2-yl phosphate;cyanide	C63H88CoN14O14P	68-19-9	184933	CC1=CC2=C(C=C1C)N(C=N2)C3C(C(C(O3)CO)OP(=O)([O-])OC(C)CNC(=O)CCC4(C(C5C6(C(C(C(=N6)C(=C7C(C(C(=N7)C=C8C(C(C(=N8)C(=C4[N-]5)C)CCC(=O)N)(C)C)CCC(=O)N)(C)CC(=O)N)C)CCC(=O)N)(C)CC(=O)N)C)CC(=O)N)C)O.[C-]#N.[Co+3]	InChI=1S/C62H90N13O14P.CN.Co/c1-29-20-39-40(21-30(29)2)75(28-70-39)57-52(84)53(41(27-76)87-57)89-90(85,86)88-31(3)26-69-49(83)18-19-59(8)37(22-46(66)80)56-62(11)61(10,25-48(68)82)36(14-17-45(65)79)51(74-62)33(5)55-60(9,24-47(67)81)34(12-15-43(63)77)38(71-55)23-42-58(6,7)35(13-16-44(64)78)50(72-42)32(4)54(59)73-56;1-2;/h20-21,23,28,31,34-37,41,52-53,56-57,76,84H,12-19,22,24-27H2,1-11H3,(H15,63,64,…	1355.4	-	Positive	[M+H]/2	Organoheterocyclic compounds	Tetrapyrroles and derivatives	Corrinoids	88	62	14	0	13	0	1	0	0	0
342	Vancomycin	(1S,2R,18R,19R,22S,25R,28R,40S)-48-[(2S,3R,4S,5S,6R)-3-[(2S,4S,5S,6S)-4-amino-5-hydroxy-4,6-dimethyloxan-2-yl]oxy-4,5-dihydroxy-6-(hydroxymethyl)oxan-2-yl]oxy-22-(2-amino-2-oxoethyl)-5,15-dichloro-2,18,32,35,37-pentahydroxy-19-[[(2R)-4-methyl-2-(methylamino)pentanoyl]amino]-20,23,26,42,44-pentaoxo-7,13-dioxa-21,24,27,41,43-pentazaoctacyclo[26.14.2.23,6.214,17.18,12.129,33.010,25.034,39]pentaconta…	C66H75Cl2N9O24	1404-90-6	14969	C[C@H]1[C@H]([C@@](C[C@@H](O1)O[C@@H]2[C@H]([C@@H]([C@H](O[C@H]2OC3=C4C=C5C=C3OC6=C(C=C(C=C6)[C@H]([C@H](C(=O)N[C@H](C(=O)N[C@H]5C(=O)N[C@@H]7C8=CC(=C(C=C8)O)C9=C(C=C(C=C9O)O)[C@H](NC(=O)[C@H]([C@@H](C1=CC(=C(O4)C=C1)Cl)O)NC7=O)C(=O)O)CC(=O)N)NC(=O)[C@@H](CC(C)C)NC)O)Cl)CO)O)O)(C)N)O	InChI=1S/C66H75Cl2N9O24/c1-23(2)12-34(71-5)58(88)76-49-51(83)26-7-10-38(32(67)14-26)97-40-16-28-17-41(55(40)101-65-56(54(86)53(85)42(22-78)99-65)100-44-21-66(4,70)57(87)24(3)96-44)98-39-11-8-27(15-33(39)68)52(84)50-63(93)75-48(64(94)95)31-18-29(79)19-37(81)45(31)30-13-25(6-9-36(30)80)46(60(90)77-50)74-61(91)47(28)73-59(89)35(20-43(69)82)72-62(49)92/h6-11,13-19,23-24,34-35,42,44,46-54,56-57,65,71,…	1449.25	-0.84	Positive	[M+H]/2	Organic acids and derivatives	Carboxylic acids and derivatives	Amino acids, peptides, and analogues	75	66	24	0	9	0	0	2	0	0
343	Iodixanol	5-[acetyl-[3-[N-acetyl-3,5-bis(2,3-dihydroxypropylcarbamoyl)-2,4,6-triiodoanilino]-2-hydroxypropyl]amino]-1-N,3-N-bis(2,3-dihydroxypropyl)-2,4,6-triiodobenzene-1,3-dicarboxamide	C35H44I6N6O15	92339-11-2	3724	CC(=O)N(CC(CN(C1=C(C(=C(C(=C1I)C(=O)NCC(CO)O)I)C(=O)NCC(CO)O)I)C(=O)C)O)C2=C(C(=C(C(=C2I)C(=O)NCC(CO)O)I)C(=O)NCC(CO)O)I	InChI=1S/C35H44I6N6O15/c1-13(52)46(30-26(38)20(32(59)42-3-15(54)9-48)24(36)21(27(30)39)33(60)43-4-16(55)10-49)7-19(58)8-47(14(2)53)31-28(40)22(34(61)44-5-17(56)11-50)25(37)23(29(31)41)35(62)45-6-18(57)12-51/h15-19,48-51,54-58H,3-12H2,1-2H3,(H,42,59)(H,43,60)(H,44,61)(H,45,62)	1550.18	-3.37	Positive	M+H	Benzenoids	Benzene and substituted derivatives	Benzoic acids and derivatives	44	35	15	0	6	0	0	0	0	6

## Sheet: Table S2
#Number	CM 03 (online)			CM 01			CM 02			CM 03			CM 04			CM 05			CM 06			CM 07			CM 08			CM 09			CM 10			CM 11			CM 12			CM 13			CM 14			CM 15			CM 16
LC method name	C1_A1B1_21min			C4_A1B1_10min			C1_A1B1_15min			C1_A1B1_21min1			C2_A1B1_21min1			C3_A1B1_21min1			C4_A1B1_21min2			C1_A1B1_30min1			C1_A1B1_30min2			C2_A1B1_30min2			C1_A1B1_30min3			C3_A1B1_30min3			C1_A1B1_45min1			C4_A1B1_60min			C5_A1B1_60min			C6_A1B1_60min			C4_A1B1_100min
Source	Public repository			Local lab			Local lab			Local lab			Local lab			Local lab			Local lab			Local lab			Local lab			Local lab			Local lab			Local lab			Local lab			Local lab			Local lab			Local lab			Local lab
Instrument	Unknown			LC-ESI-Orbitrap			LC-ESI-Orbitrap			LC-ESI-Orbitrap			LC-ESI-Orbitrap			LC-ESI-Orbitrap			LC-ESI-Orbitrap			LC-ESI-Orbitrap			LC-ESI-Orbitrap			LC-ESI-Orbitrap			LC-ESI-Orbitrap			LC-ESI-Orbitrap			LC-ESI-Orbitrap			LC-ESI-Orbitrap			LC-ESI-Orbitrap			LC-ESI-Orbitrap			LC-ESI-Orbitrap
Instrument manufacturer	Unknown			Thermo Fisher Scientific			Thermo Fisher Scientific			Thermo Fisher Scientific			Thermo Fisher Scientific			Thermo Fisher Scientific			Thermo Fisher Scientific			Thermo Fisher Scientific			Thermo Fisher Scientific			Thermo Fisher Scientific			Thermo Fisher Scientific			Thermo Fisher Scientific			Thermo Fisher Scientific			Thermo Fisher Scientific			Thermo Fisher Scientific			Thermo Fisher Scientific			Thermo Fisher Scientific
Model type	Unknown			Vanquish Q-Exactive plus			Vanquish Q-Exactive plus			Vanquish Q-Exactive plus			Vanquish Q-Exactive plus			Vanquish Q-Exactive plus			Vanquish Q-Exactive plus			Vanquish Q-Exactive plus			Vanquish Q-Exactive plus			Vanquish Q-Exactive plus			Vanquish Q-Exactive plus			Vanquish Q-Exactive plus			Vanquish Q-Exactive plus			Vanquish Q-Exactive plus			Vanquish Q-Exactive plus			Vanquish Q-Exactive plus			Vanquish Q-Exactive plus
Analytical column	Acclaim RSLC 120 C18			ACQUITY PRIMER HSS T3 with VanGuard			Acclaim RSLC 120 C18			Acclaim RSLC 120 C18			Thermo Hypersil GOLD			ACQUITY BEH C18			ACQUITY PRIMER HSS T3 with VanGuard			Acclaim RSLC 120 C18			Acclaim RSLC 120 C18			Thermo Hypersil GOLD			Acclaim RSLC 120 C18			ACQUITY BEH C18			Acclaim RSLC 120 C18			ACQUITY PRIMER HSS T3 with VanGuard			ACQUITY UPLC HSS T3			Acclaim 120 C18			ACQUITY PRIMER HSS T3 with VanGuard
Column dimensions	100x2.1 mm, 2.2 μm			100 x 2.1 mm, 1.8 μm			100 x 2.1 mm, 2.2 μm			100x2.1 mm, 2.2 μm			100 x 2.1 mm, 1.9 μm			100 x 2.1 mm, 1.7 μm			100 x 2.1 mm, 1.8 μm			100 x 2.1 mm, 2.2 μm			100 x 2.1 mm, 2.2 μm			100 x 2.1 mm, 1.9 μm			100 x 2.1 mm, 2.2 μm			100 x 2.1 mm, 1.7 μm			100 x 2.1 mm, 2.2 μm			100 x 2.1 mm, 1.8 μm			2.1 x 50 mm,1.8 μm			4.6 x 150 mm, 5 μm			100 x 2.1 mm, 1.8 μm
Sample temperature (°C)	10			10			10			10			4			10			10			10			10			4			10			10			10			10			10			4			10
Column temperature (°C)	30			30			30			30			30			40			30			30			30			30			30			30			30			30			30			30			30
Mobile phase A	Water/methanol=90:10, v/v with 0.01% formic acid and 5 mM ammonium formate			Water/methanol=90:10, v/v with 0.01% formic acid and 5 mM ammonium formate			Water/methanol=90:10, v/v with 0.01% formic acid and 5 mM ammonium formate			Water/methanol=90:10, v/v with 0.01% formic acid and 5 mM ammonium formate			Water/methanol=90:10, v/v with 0.01% formic acid and 5 mM ammonium formate			Water/methanol=90:10, v/v with 0.01% formic acid and 5 mM ammonium formate			Water/methanol=90:10, v/v with 0.01% formic acid and 5 mM ammonium formate			Water/methanol=90:10, v/v with 0.01% formic acid and 5 mM ammonium formate			Water/methanol=90:10, v/v with 0.01% formic acid and 5 mM ammonium formate			Water/methanol=90:10, v/v with 0.01% formic acid and 5 mM ammonium formate			Water/methanol=90:10, v/v with 0.01% formic acid and 5 mM ammonium formate			Water/methanol=90:10, v/v with 0.01% formic acid and 5 mM ammonium formate			Water/methanol=90:10, v/v with 0.01% formic acid and 5 mM ammonium formate			Water/methanol=90:10, v/v with 0.01% formic acid and 5 mM ammonium formate			Water/methanol=90:10, v/v with 0.01% formic acid and 5 mM ammonium formate			Water/methanol=90:10, v/v with 0.01% formic acid and 5 mM ammonium formate			Water/methanol=90:10, v/v with 0.01% formic acid and 5 mM ammonium formate
Mobile phase B	Methanol with 0.01% formic acid and 5 mM ammonium formate			Methanol with 0.01% formic acid and 5 mM ammonium formate			Methanol with 0.01% formic acid and 5 mM ammonium formate			Methanol with 0.01% formic acid and 5 mM ammonium formate			Methanol with 0.01% formic acid and 5 mM ammonium formate			Methanol with 0.01% formic acid and 5 mM ammonium formate			Methanol with 0.01% formic acid and 5 mM ammonium formate			Methanol with 0.01% formic acid and 5 mM ammonium formate			Methanol with 0.01% formic acid and 5 mM ammonium formate			Methanol with 0.01% formic acid and 5 mM ammonium formate			Methanol with 0.01% formic acid and 5 mM ammonium formate			Methanol with 0.01% formic acid and 5 mM ammonium formate			Methanol with 0.01% formic acid and 5 mM ammonium formate			Methanol with 0.01% formic acid and 5 mM ammonium formate			Methanol with 0.01% formic acid and 5 mM ammonium formate			Methanol with 0.01% formic acid and 5 mM ammonium formate			Methanol with 0.01% formic acid and 5 mM ammonium formate
Gradient elution program	Time (min)	Flow rate (min)	B (%)	Time (min)	Flow rate (mL/min)	B (%)	Time (min)	Flow rate (min)	B (%)	Time (min)	Flow rate (min)	B (%)	Time (min)	Flow rate (min)	B (%)	Time (min)	Flow rate (min)	B (%)	Time (min)	Flow rate (min)	B (%)	Time (min)	Flow rate (min)	B (%)	Time (min)	Flow rate (min)	B (%)	Time (min)	Flow rate (min)	B (%)	Time (min)	Flow rate (min)	B (%)	Time (min)	Flow rate (min)	B (%)	Time (min)	Flow rate (min)	B (%)	Time (min)	Flow rate (mL/min)	B (%)	Time (min)	Flow rate (mL/min)	B (%)	Time (min)	Flow rate (mL/min)	B (%)	Time (min)
	0	0.2	1	0	0.2	5	0	0.3	0	0	0.2	1	0	0.2	1	0	0.2	1	0	0.2	0	0	0.2	1	0	0.3	0	0	0.3	0	0	0.2	0	0	0.2	0	0	0.3	0	0	0.2	1	0	0.2	1	0	0.2	5	0
	1	0.2	1	1	0.2	5	2	0.3	0	1	0.2	1	1	0.2	1	1	0.2	1	2	0.2	0	1	0.2	1	2	0.3	0	2	0.3	0	2	0.2	0	2	0.2	0	2	0.3	0	1	0.2	1	1	0.2	1	1	0.2	5	2
	3	0.2	39	2	0.2	40	10	0.3	100	3	0.2	39	3	0.2	39	3	0.2	39	4	0.2	40	5	0.2	39	24	0.3	100	24	0.3	100	24	0.2	100	24	0.2	100	38	0.3	100	12	0.2	40	12	0.2	40	12	0.2	40	40
	14	0.4	99	6	0.2	100	12	0.3	100	14	0.4	99	14	0.4	99	14	0.4	99	15	0.2	100	21	0.4	99	27	0.3	100	27	0.3	100	27	0.2	100	27	0.2	100	42	0.3	100	40	0.2	100	40	0.2	100	40	0.2	100	70
	16	0.48	99	8	0.2	100	12.1	0.3	0	16	0.48	99	16	0.48	99	16	0.48	99	18	0.2	100	25	0.48	99	27.1	0.3	0	27.1	0.3	0	27.1	0.2	0	27.1	0.2	0	42.1	0.3	0	49	0.2	100	49	0.2	100	49	0.2	100	89
	16.1	0.2	1	8.1	0.2	5	15	0.3	0	16.1	0.2	1	16.1	0.2	1	16.1	0.2	1	18.1	0.2	0	25.1	0.2	1	30	0.3	0	30	0.3	0	30	0.2	0	30	0.2	0	45	0.3	0	50	0.2	1	50	0.2	1	50	0.2	5	90
	21	0.2	1	10	0.2	5				21	0.2	1	21	0.2	1	21	0.2	1	21	0.2	0	30	0.2	1																60	0.2	1	60	0.2	1	60	0.2	5	100
A1: Water/methanol=90:10, v/v; with 0.01% formic acid and 5 mM ammonium formate
B1: Methanol with 0.01% formic acid and 5 mM ammonium formate
A2: Water with 0.1% formic acid
B2: Acetonitrile with 0.1% formic acid
A3: Water with 5 mM ammonium acetate
B3: Methanol with 5 mM ammonium acetate
A4: Water/methanol=90:10, v/v; with 5 mM ammonium formate
B4: Methanol with 5 mM ammonium formate
A5: Water with 0.1% formic acid and 4 mM ammonium formate
B5: Methanol with 0.1% formic acid and 4 mM ammonium formate
B6: Acetonitrile with 0.1% formic acid
[truncated: 44 more columns]

## Sheet: Table S3
Number	Compound Name	Test/calibrant	Group (25)	CM 01	CM 02	CM 03	CM 04	CM 05	CM 06	CM 07	CM 08	CM 09	CM 10	CM 11	CM 12	CM 13	CM 14	CM 15	CM 16	CM 17	CM 18	CM 19	CM 20	CM 21	CM 22	CM 23	CM 24	CM 25	CM 26	CM 27	CM 28	CM 29	CM 30
				C4_A1B1_10min	C1_A1B1_15min	C1_A1B1_21min1	C2_A1B1_21min1	C3_A1B1_21min1	C4_A1B1_21min2	C1_A1B1_30min1	C1_A1B1_30min2	C2_A1B1_30min2	C1_A1B1_30min3	C3_A1B1_30min3	C1_A1B1_45min1	C4_A1B1_60min	C5_A1B1_60min	C6_A1B1_60min	C4_A1B1_100min	C2_A5B5_14min	C2_A5B5_21min1	C1_A1B6_21min1	C4_A2B2_20min1	C2_A2B2_21min	C4_A2B2_45min2	C5_A2B2_45min2	C6_A2B2_45min2	C4_A3B3_20min2	C5_A3B3_20min2	C4_A3B3_30min4	C5_A3B3_30min4	C6_A3B3_30min4	C1_A4B4_21min1
1	4-Amino-1,2,4-triazole	Test	21	ND	0.91	1.355	1.385	1.305	1.4	1.37	0.91	0.93	1.35	1.325	0.905	ND	ND	ND	ND	0.92	1.44	1.365	0.625	1.41	ND	ND	ND	ND	ND	ND	ND	ND	1.35
2	Moniliformin	Calibrant	21	1.4	1.03	1.565	1.44	1.33	1.45	1.58	1.045	0.975	1.55	1.395	1.04	1.45	0.82	2.01	1.43	0.955	1.63	1.55	0.87	1.63	1.62	0.85	2.13	1.44	0.85	1.46	0.83	2.16	1.335
3	3-Amino-2-oxazolidinone	Test	21	ND	0.9	1.395	1.43	1.35	1.49	1.4	0.95	0.97	1.4	1.435	0.9	ND	ND	ND	ND	0.955	1.43	1.405	0.685	1.4	ND	ND	ND	ND	ND	ND	ND	ND	1.41
4	1H-benzotriazole	Test	25	5.09	6.32	5.615	5.285	5.11	7.065	7.05	8.265	7.05	10.19	9.075	9.35	10.46	7.3	10.88	15.77	3.5	5.76	4.895	5.68	4.875	8.49	6.52	8.68	9.4	7.2	9.09	7.31	9.04	5.55
5	Nicotinic Acid	Test	16	1.83	ND	ND	ND	ND	ND	ND	ND	ND	ND	ND	ND	2.02	1.12	2.59	2.03	ND	ND	ND	ND	ND	1.96	1.13	2.38	2.11	1.21	2.19	1.21	2.58	ND
6	Melamine	Test	21	1.36	0.91	1.355	1.38	1.305	1.42	1.36	0.925	0.925	1.365	1.32	0.91	1.38	0.8	1.77	1.39	0.895	1.475	1.375	0.645	1.445	1.27	0.77	1.58	1.52	0.87	1.53	0.84	2.48	1.44
7	Metformin	Test	21	1.36	0.92	1.38	1.395	1.305	1.43	1.37	0.925	0.93	1.38	1.32	0.92	1.38	0.8	1.79	1.39	0.925	1.475	1.385	0.64	1.46	1.27	0.77	1.63	1.47	0.84	1.48	0.84	2.57	1.785
8	1,3-Benzothiazol	Test	15	6.18	8.18	7.52	6.85	6.62	9.235	9.79	13.125	11.77	15.1	13.675	16.865	16	12.63	16.71	32.21	5.365	7.44	6.26	7.905	6.07	12.46	10.15	13.01	11.99	10.21	12.16	9.88	12.37	7.545
9	Trimethyl phosphate	Test	6	4.03	4.385	4.52	4.21	3.925	5.73	5.03	4.485	3.365	6.195	4.6	4.435	5.97	3.58	6.44	6.89	2.325	4.855	4.365	4.38	4.425	6.05	3.49	6.49	6.49	4.54	6.92	5.16	6.92	4.525
10	Hexamethylenetetramine	Test	21	ND	0.875	1.315	1.38	1.29	1.375	1.3	0.865	0.92	1.31	1.29	0.87	ND	ND	ND	ND	0.885	1.45	1.345	0.59	1.405	ND	ND	ND	ND	ND	ND	ND	ND	1.45
11	(±)-Methamidophos	Calibrant	11	2.59	1.95	2.875	2.42	2.315	3.19	2.855	1.96	1.64	2.85	2.395	1.96	3.22	1.72	3.92	3.19	1.475	4.09	2.745	2.06	3.635	2.95	1.6	4.12	4.12	2.17	4.53	2.32	5.24	2.885
12	Patulin	Test	6	3.71	3.2	4.125	3.3	3.06	5.215	4.335	3.2	2.26	4.62	3.395	3.205	4.85	2.66	5.44	5.09	1.815	4.545	4.185	4.9	4.365	5.85	2.86	6.39	5.63	3.68	6.23	4.18	6.36	4.105
13	L-carnitime	Test	21	1.27	ND	ND	ND	ND	ND	ND	ND	ND	ND	ND	ND	1.27	0.75	1.6	1.25	ND	ND	ND	ND	ND	1.21	0.75	1.56	1.3	0.78	1.31	0.77	1.66	ND
14	Recinine	Test	1	4.08	4.815	4.55	4.19	3.89	5.805	5.21	5.4	3.645	6.89	5.14	5.61	6.56	4.31	6.67	8.32	2.17	4.815	4.43	4.875	4.505	6.96	5.02	7.08	6.86	5.19	7.15	5.76	6.91	4.555
15	Pyridoxine	Test	16	1.88	ND	ND	ND	ND	ND	ND	ND	ND	ND	ND	ND	2.26	1.29	2.8	2.24	ND	ND	ND	ND	ND	1.96	1.13	2.41	4.22	2.32	4.85	2.59	5.41	ND
16	Pencillic acid	Test	13	4.92	6.26	5.495	5.235	5.115	6.935	6.92	8.375	7.45	10.185	9.36	9.71	10.44	7.63	10.7	17.04	3.58	5.71	5.07	6.2	5.07	9.38	7.39	9.56	7.16	4.9	7.71	5.69	7.79	4.265
17	Metronidazole	Test	6	4.12	4.565	4.585	4.135	3.815	5.835	5.175	4.845	3.205	6.48	4.59	4.805	6.23	3.78	6.67	7.32	2.075	4.755	4.455	4.29	4.345	5.93	3.33	6.38	6.67	4.7	7.08	5.29	7.05	4.59
18	Triethyl phosphate	Calibrant	14	5.92	7.725	6.89	6.43	6.325	8.77	8.98	12.2	11.135	14.08	13.115	15.635	15.35	12.37	15.33	32.02	5.12	6.975	5.565	7.185	5.485	11.04	9.17	11.21	11.62	10	11.62	9.59	11.45	6.93
19	Acephate	Calibrant	6	3.36	2.795	3.88	3.15	2.96	4.725	3.95	2.79	2.17	4.01	3.175	2.79	4.47	2.43	4.95	4.61	1.775	4.5	3.79	3.795	4.17	4.32	2.18	5.36	5.27	3.39	5.95	3.95	6.06	3.2
20	Sulfamylon	Test	2	ND	0.925	1.375	1.375	1.32	1.435	1.375	0.92	0.94	1.37	1.33	0.925	ND	ND	ND	ND	0.92	1.48	1.385	0.675	1.47	ND	ND	ND	ND	ND	ND	ND	ND	2.44
21	Molinate	Test	9	7.56	9.955	10.415	9.41	9.45	13	14.14	18.44	16.955	20.28	19.12	25.825	26.01	21.9	26.5	53.73	7.33	9.98	8.685	10.705	8	19.09	15.7	19.99	14.48	12.99	16.88	14.59	16.96	10.46
22	Atrazine-desethyl	Test	19	5.71	7.35	6.505	6	5.925	8.26	8.355	10.96	9.625	12.91	11.8	13.475	13.72	10.53	13.98	25.64	4.57	6.54	5.315	6.645	5.225	10.12	8.19	10.3	11.07	9.19	10.82	8.77	10.8	6.52
23	Isoprocarb	Test	15	6.75	8.965	8.72	8.04	7.99	10.99	11.685	15.81	14.685	17.59	16.755	21.58	21.04	17.33	21.47	46.65	6.405	8.66	7.265	9.525	7.02	15.98	13.24	16.5	13.2	11.77	14.49	12.31	14.53	8.75
24	Bisphenol F	Test	15	ND	ND	ND	ND	ND	ND	ND	ND	ND	ND	ND	ND	ND	ND	ND	ND	ND	ND	ND	ND	ND	ND	ND	ND	12.53	11.11	13.27	11.26	13.1	ND
25	3-Amino-5-morpholinomethyl-2-oxazolidinone	Test	2	ND	0.905	1.345	1.365	1.345	1.425	1.35	0.9	0.91	1.35	1.32	0.895	ND	ND	ND	ND	0.9	1.44	1.36	0.59	1.4	ND	ND	ND	ND	ND	ND	ND	ND	2.545
26	Thiabendazole	Calibrant	3	5.99	7.67	6.915	6.165	6.13	8.8	8.87	11.635	9.73	13.645	12.185	14.4	14.56	11.23	14.7	27.4	3.25	5.595	5.3	5.24	4.48	7.46	6.3	7.26	12.08	10.36	12.32	10.07	12.16	7.37
27	4-Octylphenol	Test	5	ND	ND	ND	ND	ND	ND	ND	ND	ND	ND	ND	ND	ND	ND	ND	ND	ND	ND	ND	ND	ND	ND	ND	ND	15.65	14.42	19.68	17.86	19.45	ND
28	(2E)-2-(2-Nitrobenzylidene)hydrazinecarboxamide	Test	19	5.47	7.2	6.275	5.805	5.65	7.925	8.08	10.85	9.53	12.65	11.515	13.51	13.34	10.44	13.55	25.79	4.305	6.315	5.3	7.01	5.28	10.68	8.87	10.75	10.8	9.05	10.46	8.58	10.32	6.28
29	Propoxur	Calibrant	15	6.28	8.27	7.63	7	6.97	9.69	10.05	13.78	12.575	15.62	14.68	18.25	17.68	14.34	17.83	38.9	5.63	7.61	6.505	8.66	6.345	13.9	11.56	14.28	12.36	10.8	12.87	10.71	12.75	7.66
30	Ethirimol	Test	8	6.78	8.81	8.45	7.63	7.985	10.77	11.12	14.83	13.375	16.9	16.365	19.62	19.61	15.94	20.15	41.7	4.98	6.815	5.595	6.13	4.88	9.12	9.01	8.97	13.49	12.02	14.97	12.73	15.04	9.04
31	Perfluorobutanoic acid	Test	23	5.11	6.63	6.09	5.49	5.265	7.105	7.635	8.375	6.255	10.915	8.62	9.095	7.9	7.85	6.27	12.51	3.87	6.03	4.98	6.06	5.045	9.31	6.93	9.92	8.81	6.03	8.65	6.37	9.5	5.395
32	Sulfacetamide	Calibrant	17	3.61	3.035	4.025	3.195	2.755	5.05	4.185	3.05	2.2	4.38	3.12	3.035	4.75	2.61	5.23	5.02	1.715	4.5	4.245	4.49	4.45	6.56	3.91	6.98	1.43	0.84	1.73	0.85	2.61	1.455
33	Sulfaguanidine	Calibrant	16	1.73	1.335	1.965	1.46	1.73	2.11	1.965	1.34	1.21	1.97	1.84	1.335	1.93	0.98	2.67	1.91	0.935	1.7	2.035	1.24	1.595	1.75	0.95	3.22	2.36	1.06	2.52	1.03	3.91	1.975
34	Metribuzin	Test	14	6.43	8.375	7.8	7.03	6.99	9.95	10.205	13.69	12.16	15.68	14.53	17.805	17.66	14.02	17.95	37.06	5.56	7.62	6.43	8.4	6.19	13.42	11.06	13.78	12.52	10.8	13.02	10.71	13.04	7.81
35	Cycloate	Test	10	8.19	10.78	12.09	11.04	11.175	14.89	16.745	21.09	19.615	22.78	21.73	30.42	31.54	27.74	31.95	60.35	8.28	11.5	10.73	12.57	9.71	24.68	20.79	25.7	15.5	14.14	19.16	17.06	19.21	12.15
36	Mequindox	Test	25	4.94	6.35	5.525	5.12	4.995	7.005	6.99	8.62	7.145	10.36	8.975	10.12	10.54	7.77	10.57	17.72	3.355	5.565	4.955	6.045	4.89	8.95	7.13	8.97	9.39	7.42	9.02	7.4	8.78	5.535
37	Pantothenic Acid	Test	17	3.7	ND	ND	ND	ND	ND	ND	ND	ND	ND	ND	ND	5.14	3	5.55	5.64	ND	ND	ND	ND	ND	5.28	2.76	5.74	2.69	1.53	2.93	1.66	3.4	ND
38	4-nonylphenol	Test	10	ND	ND	ND	ND	ND	ND	ND	ND	ND	ND	ND	ND	ND	ND	ND	ND	ND	ND	ND	ND	ND	ND	ND	ND	16.44	15.17	21.13	19.39	20.03	ND
39	Dichlorvos	Test	15	6.21	8.265	7.65	7.08	6.96	9.58	10.06	13.73	12.64	15.6	14.67	18.065	17.28	13.98	17.83	37.17	5.655	7.69	6.26	8.265	6.135	13.09	10.94	13.48	12.25	10.71	12.71	10.54	12.77	7.665
40	Monocrotophos	Test	25	4.65	6.015	5.23	5.01	4.875	6.63	6.58	8.1	7.15	9.695	8.765	9.46	9.89	7.11	9.8	16.73	3.29	5.42	4.655	5.495	4.66	7.9	6.23	7.89	8.87	7.02	8.53	7.07	8.24	5.235
41	Mepanipyrim	Test	9	7.5	10.035	10.655	9.63	9.665	13.2	14.585	18.95	17.485	20.66	19.58	26.875	27	23.14	27.62	55.2	7.4	10.17	8.89	10.96	8.195	19.91	16.86	20.69	14.5	13.15	17.15	15.01	17.29	10.685
42	Mevinphos	Test	19	5.27	6.88	5.93	5.575	5.47	7.505	7.63	10.16	9.105	11.87	10.9	12.555	12.56	9.87	12.44	24.3	4.165	6.06	5.16	6.55	5.135	9.89	8.1	9.94	10.37	8.62	9.9	8.2	9.63	5.95
43	Tripropyl phosphate	Test	4	7.07	9.375	9.46	8.74	8.73	12.015	12.845	17.135	16.03	18.885	18.015	23.91	24.02	20.36	23.9	51.58	6.935	9.315	7.205	9.35	6.895	15.49	13.01	15.88	13.81	12.47	15.77	13.69	15.57	9.525
44	Triisopropyl phosphate	Test	9	7.2	9.6	9.885	9.16	9.185	12.47	13.48	17.82	16.74	19.545	18.715	25.09	25.23	21.55	25.33	53.11	7.185	9.72	7.655	9.825	7.295	16.69	14	17.19	14.07	12.72	16.33	14.25	16.19	9.94
45	Bisphenol A	Test	15	ND	ND	ND	ND	ND	ND	ND	ND	ND	ND	ND	ND	ND	ND	ND	ND	ND	ND	ND	ND	ND	ND	ND	ND	13.36	12.03	14.96	12.92	14.89	ND
46	Dimethoate	Test	19	5.36	6.94	6.075	5.645	5.505	7.7	7.765	9.98	8.73	11.865	10.79	12.025	12.45	9.41	12.67	22.34	4.1	6.16	5.355	6.91	5.325	10.57	8.56	10.73	10.46	8.5	10.07	8.18	9.94	6.075
47	Propazine	Test	9	7.22	9.545	9.71	8.875	8.915	12.325	13.14	17.42	16.16	19.215	18.285	24.205	24.43	20.46	24.59	51.76	6.99	9.47	7.81	9.99	7.385	17.17	14.36	17.82	14.03	12.58	16.09	13.84	16.02	9.74
48	PF4OPeA	Test	19	5.48	ND	ND	ND	ND	ND	ND	ND	ND	ND	ND	ND	12.5	10.64	14.11	19.18	ND	ND	ND	ND	ND	10.33	8.2	10.93	10.28	7.9	9.89	7.8	10.67	ND
49	Nalidixic acid	Test	15	6.39	8.4	7.8	7.05	6.895	9.91	10.315	14.265	12.93	16.07	14.78	19.155	18.31	15	18.51	41.29	5.615	7.65	6.425	8.49	6.14	13.47	11.25	13.91	11.93	10.36	12.11	10.05	12	7.065
50	2-NP-AOZ	Test	20	5.43	7.13	6.19	5.66	5.55	7.84	7.96	10.685	9.175	12.44	11.145	13.31	13.14	10.3	13.17	25.49	4.175	6.155	5.735	7.675	5.655	11.94	9.86	12.09	10.7	8.95	10.33	8.47	10.09	6.195
51	Carbamazepine	Calibrant	8	6.46	8.615	8.16	7.46	7.425	10.335	10.9	15.02	13.91	16.73	15.885	20.475	19.62	16.25	19.85	44.74	6.01	8.09	6.2	8.425	5.995	13.12	11.26	13.25	12.78	11.36	13.73	11.6	13.63	8.19
52	Pirimicarb	Test	4	6.68	8.79	8.405	7.55	7.69	10.715	11.15	15.1	13.63	16.975	16	20.315	19.97	16.21	19.94	44.2	5.08	6.82	6.76	6.09	4.86	9.02	7.53	8.92	13.18	11.69	14.35	12.15	14.2	8.61
53	Salbutamol	Test	6	3.38	3.925	4.12	3.835	3.515	5.485	4.455	3.94	2.895	5.535	4.28	3.91	5.59	3.67	5.58	6.85	1.835	4.51	4.135	4.235	4.135	5.41	3.1	5.54	6.3	4.76	6.67	5.26	6.48	4.69
54	Methacrifos	Test	9	6.93	9.315	9.355	8.58	8.465	11.655	12.665	16.97	15.805	18.685	17.71	23.65	23.09	19.41	23.49	50.35	6.73	9.19	5.985	ND	ND	18.33	15.34	18.65	13.62	12.21	15.33	13.22	15.37	9.38
55	Bentazone	Calibrant	20	5.39	7.205	6.305	5.76	5.445	7.76	8.11	10.905	9.465	12.73	11.12	13.58	13.3	10.39	13.51	25.91	5.47	7.585	5.27	9.12	6.59	14.79	12.31	15.29	8.83	6.8	8.58	6.99	8.72	5.165
56	Bisphenol B	Test	10	ND	ND	ND	ND	ND	ND	ND	ND	ND	ND	ND	ND	ND	ND	ND	ND	ND	ND	ND	ND	ND	ND	ND	ND	13.86	12.55	16	13.99	15.68	ND
57	Ethoprophos	Test	9	7.55	10.02	10.68	9.82	9.885	13.355	14.66	19.03	17.805	20.72	19.825	27.085	27.6	23.89	27.73	55.96	7.57	10.37	8.67	10.825	8.115	19.44	16.28	20.07	14.56	13.27	17.34	15.28	17.29	10.73
58	Biotin	Test	13	4.79	ND	ND	ND	ND	ND	ND	ND	ND	ND	ND	ND	10.37	7.81	10.45	17.83	ND	ND	ND	ND	ND	8.35	6.88	8.21	5.36	3.59	6.03	4.42	6.18	ND
59	Fonofos	Test	10	7.84	10.45	11.505	10.46	10.585	14.155	15.91	20.27	18.77	21.92	20.895	29.135	29.78	26.13	30.31	58.44	7.92	10.975	10.32	12.4	9.575	24.22	20.7	24.05	15.04	13.74	18.27	16.27	18.41	11.55
60	Paraoxon-methyl	Calibrant	14	5.94	7.915	7.125	6.54	6.38	8.95	9.34	12.93	11.72	14.69	13.63	16.955	16	13.09	16.24	34.78	5.165	7.12	6.095	8.45	5.985	12.87	10.85	12.67	11.78	10.26	11.93	9.89	11.84	7.13
61	2-NP-AHD	Test	20	5.36	7.09	6.14	5.58	5.485	7.76	7.895	10.6	8.96	12.365	11.065	13.23	12.98	10.19	13.09	25.09	4.05	6.065	5.43	7.6	5.35	ND	9.12	ND	10.51	8.73	10.09	8.33	9.9	5.965
62	Sulfapyridine	Test	1	4.2	4.94	4.685	4.425	4.165	5.94	5.53	5.81	4.435	7.405	5.81	5.855	7.14	4.56	7.46	9.4	2.48	4.935	4.66	5.35	4.65	7.61	5.27	7.95	7.23	5.26	7.51	5.9	7.26	4.675
63	PFPrS	Test	19	5.35	ND	ND	ND	ND	ND	ND	ND	ND	ND	ND	ND	12.3	10.31	13.75	19.75	ND	ND	ND	ND	ND	11.85	9.44	13.24	10.13	7.99	9.73	7.85	10.35	ND
64	(-)-Citrinin	Test	15	6.21	8.62	8.17	7.32	7.125	9.785	10.93	15.1	13.685	16.765	15.535	20.62	18.42	15.22	19.54	42.23	5.87	8.065	5.705	ND	6.785	ND	ND	ND	12.25	10.86	12.82	10.83	13.28	7.625
65	Bisphenol S	Test	20	5.39	ND	ND	ND	ND	ND	ND	ND	ND	ND	ND	ND	13.7	11.02	13.78	28.23	ND	ND	ND	ND	ND	11.26	9.45	11.29	10.73	9.1	10.34	8.58	10.07	ND
66	Sulfadiazine	Calibrant	12	3.97	4.46	4.425	4.095	3.67	5.7	4.95	4.695	3.28	6.265	4.355	4.645	6.06	3.74	6.26	7.3	2.085	4.72	4.495	4.825	4.545	7.06	4.75	7.4	4.05	2.99	5.61	3.19	6.01	2.23
67	Hexazinone	Test	15	6.39	8.41	7.825	7.165	7.06	9.9	10.315	14.12	12.92	15.95	14.905	18.77	18.02	14.57	18.22	39.6	5.72	7.76	5.85	7.78	5.685	11.99	10.13	12.07	12.5	10.92	13.07	10.83	13	7.84
68	Sulfamethoxazole	Test	13	4.85	6.36	5.445	5.2	5.075	6.865	6.96	8.895	7.94	10.525	9.65	10.62	10.86	8.24	10.92	19.24	3.57	5.635	5.335	7.1	5.39	10.94	8.88	11.07	6.88	4.45	7.39	5.78	7.27	3.615
69	Fenothiocarb	Test	9	7.68	10.285	11.18	10.16	10.23	13.75	15.405	19.78	18.355	21.45	20.4	28.345	28.65	24.95	29.31	57.18	7.72	10.7	9.31	11.44	8.635	21.28	17.99	22.08	14.81	13.47	17.8	15.75	17.95	11.22
70	Sulfathiazole	Test	1	4.07	4.845	4.575	4.335	4.015	5.835	5.3	5.62	4.31	7.115	5.615	5.7	6.78	4.38	6.99	8.87	2.295	4.855	4.57	5.31	4.625	7.53	5.29	7.8	6.67	4.85	7.04	5.43	6.92	4.265
71	Formothion	Test	15	6.06	7.975	7.21	ND	6.475	9.13	9.45	12.95	ND	14.765	13.785	16.855	16.27	13.17	16.48	34.83	ND	ND	ND	ND	ND	14.49	12.02	14.36	11.91	10.34	12.11	10	12.05	7.21
72	Thiobencarb	Test	10	7.95	10.595	11.835	10.85	11.005	14.48	16.405	20.75	19.38	22.37	21.465	29.995	30.76	27.22	31.43	59.54	8.15	11.32	10.34	12.325	9.53	24.07	20.51	24.93	15.22	13.94	18.69	16.73	18.84	11.865
73	Alternariol	Test	4	6.92	9.26	9.36	8.585	8.46	11.62	12.66	16.96	15.805	18.68	17.14	23.495	22.73	19.02	22.98	49.87	6.725	9.205	7.155	8.78	6.175	13.98	11.92	14.14	13.44	12.02	14.95	12.78	14.79	9.39
74	Metobromuron	Test	15	6.8	8.995	8.76	7.925	7.865	10.995	11.7	15.765	14.36	17.59	16.595	21.42	20.78	16.97	21.4	45.77	6.27	8.55	7.34	9.58	7.035	16.08	13.35	16.66	13.23	11.71	14.45	12.18	14.6	8.76
75	Bromacil	Test	15	6.39	8.38	7.795	7.115	7.01	9.91	10.215	13.89	12.635	15.795	14.78	18.28	17.83	14.3	18.16	38.33	5.635	7.71	6.02	8.02	5.865	12.48	10.42	12.65	12.5	10.86	13.07	10.77	13.04	7.8
76	Oxolinic acid	Test	14	5.81	7.73	6.835	6.175	5.965	8.63	8.955	12.5	11.055	14.195	12.785	16.3	15.35	12.58	15.39	33.62	4.775	6.72	5.595	7.54	5.49	11.6	9.78	11.61	11.37	9.85	11.3	9.37	11.21	6.615
77	Flumequine	Test	15	6.46	8.58	8.1	7.315	7.165	10.23	10.795	14.84	13.475	16.58	15.42	20.05	19.03	15.62	19.54	42.92	5.79	7.935	6.5	8.715	6.25	13.86	11.67	14.22	12.43	10.92	12.94	10.83	12.98	7.795
78	Cinoxacin	Test	14	5.54	7.42	6.43	5.795	5.57	8.115	8.33	11.475	9.87	13.235	11.555	14.745	14.02	11.34	14.08	29.16	4.43	6.365	5.39	7.125	5.275	10.86	9.06	10.88	6.42	4.7	6.94	5.39	6.97	4.235
79	Carbadox	Test	19	5.07	6.75	5.75	5.185	5.005	7.265	7.41	10.03	8.105	11.6	10.005	12.515	12.01	9.49	11.84	23.53	3.535	5.61	4.73	5.755	4.63	8.31	6.87	8.13	10.04	8.32	9.51	7.92	9.15	5.75
80	Perfluoropentanoic acid	Test	14	5.91	8.165	7.575	6.935	6.625	8.985	9.99	13.46	11.95	15.455	13.99	17.535	15.88	12.66	17.47	31.36	5.485	7.595	5.455	7.57	5.595	11.67	9.6	12.44	11.58	9.99	11.65	9.58	12.3	6.925
81	Sulfamerazine	Calibrant	1	4.3	5.1	4.805	4.49	4.235	6.11	5.71	6.22	4.525	7.71	5.835	6.24	7.66	4.84	7.91	11.53	2.62	5.045	4.755	5.55	4.76	8.16	5.89	8.33	6.93	4.96	7.32	5.58	7.24	4.08
82	Aclonifen	Test	10	7.75	ND	ND	ND	ND	ND	ND	ND	ND	ND	ND	ND	28.87	25.21	29.79	57.44	ND	ND	ND	ND	ND	22.22	18.95	22.56	14.83	13.55	17.93	15.88	18.13	ND
83	Dienestrol	Test	4	7.16	ND	ND	ND	ND	ND	ND	ND	ND	ND	ND	ND	26.18	22.85	26.21	54.56	ND	ND	ND	ND	ND	ND	ND	ND	14.05	12.8	16.5	14.61	16.51	ND
84	Tributyl phosphate	Test	10	8.02	10.59	11.92	11.14	11.24	14.74	16.62	20.92	19.83	22.5	21.77	30.46	31.84	28.53	31.82	60.78	8.3	11.56	9.925	11.96	9.275	22.96	19.57	23.54	15.35	14.14	19.03	17.19	18.84	11.99
85	Triisobutyl phosphate	Test	10	8.02	10.65	12.06	11.26	11.375	14.82	16.82	21.125	20.025	22.685	21.965	30.795	32.1	28.82	32.25	61.02	8.355	11.68	10.055	12.035	9.395	23.2	19.8	23.89	15.35	14.14	19.11	17.31	19.03	12.115
86	Sulfisoxazole	Test	20	4.92	6.54	5.555	5.305	5.135	7.04	7.155	9.46	8.5	11.08	10.165	11.555	11.52	8.96	11.48	21.7	3.815	5.78	5.39	7.355	5.47	11.32	9.34	11.44	6.26	4.26	6.8	5.24	6.82	4.19
87	Diethylstilbestrol	Test	4	ND	ND	ND	ND	ND	ND	ND	ND	ND	ND	ND	ND	ND	ND	ND	ND	ND	ND	ND	ND	ND	ND	ND	ND	13.99	12.73	16.32	14.41	ND	ND
88	Mephosfolan	Test	15	6.14	8.165	7.455	6.905	6.84	9.475	9.845	13.68	12.665	15.405	14.585	18.235	17.43	14.34	17.44	39.31	5.59	7.5	5.97	7.995	5.83	12.41	10.53	12.53	12.23	10.73	12.63	10.61	12.44	7.49
89	Acetochlor	Test	9	7.61	10.11	10.785	9.855	9.955	13.5	14.8	19.19	17.805	20.845	19.94	27.235	27.89	24.04	27.97	56.27	7.59	10.41	9.205	11.4	8.6	21.26	17.84	21.76	14.7	13.35	17.52	15.45	17.42	10.85
90	Sulfamethizol	Calibrant	18	4.51	5.82	5.085	4.88	4.69	6.44	6.33	7.685	6.795	9.235	8.265	8.85	9.31	6.87	9.3	15.27	2.93	5.29	4.915	6.145	4.945	9.16	7.32	9.24	5.93	4.04	6.61	5.14	6.58	4.08
91	Hexestrol	Test	10	ND	ND	ND	ND	ND	ND	ND	ND	ND	ND	ND	ND	ND	ND	ND	ND	ND	ND	ND	ND	ND	ND	ND	ND	14.15	12.9	16.68	14.79	16.7	ND
92	Paraoxon	Test	9	6.66	8.9	8.655	7.915	7.85	10.89	11.64	15.88	14.72	17.56	16.65	21.89	21.18	17.75	21.32	47.62	6.325	8.55	7.165	9.5	6.915	15.84	13.31	16.25	13.14	11.77	14.43	12.35	14.33	8.68
93	Nifuroxazide	Test	14	5.79	7.77	6.88	6.01	5.885	8.68	9.045	12.745	10.615	14.39	12.84	16.73	15.57	12.8	15.58	34.22	4.55	6.56	5.445	7.4	5.375	11.32	9.54	11.32	11.54	10.06	11.57	9.61	11.31	6.855
94	Sudan II	Test	5	8.15	12.805	15.04	13.565	13.87	17.93	21.16	25.32	23.275	27.14	25.76	37.4	39.3	40.87	35.93	68.78	9.65	13.825	13.65	14.765	11.99	31.74	27.73	33.45	17.81	16.03	22.63	20.58	23.42	15.105
95	Phorate sulfoxide	Test	15	6.66	8.845	8.535	7.84	7.775	10.79	11.425	15.58	14.47	17.325	16.44	21.32	20.74	17.16	20.86	46.57	6.26	8.46	6.78	9.02	6.56	14.6	12.3	14.89	13.07	11.67	14.28	12.15	14.17	8.55
96	Clenbuterol	Calibrant	19	4.98	6.455	5.51	5.37	5.305	7.14	7.08	9.29	8.77	10.91	10.685	11.345	11.83	10.65	11.76	22.87	3.925	5.78	4.905	6.235	4.895	9.24	8.35	9.03	10.48	9.65	9.96	9.03	9.85	6.41
97	Fenthion	Test	10	7.75	10.4	11.44	10.445	10.525	14.005	15.835	20.21	18.79	21.815	20.865	29.105	29.56	25.97	30.29	58.23	7.865	10.95	7.91	10.205	ND	ND	19.93	23.56	14.95	13.67	18.13	16.16	18.3	11.48
98	Sulfisomidin	Test	1	4.01	4.74	4.505	4.215	3.885	5.775	5.155	5.33	3.825	6.79	5.015	5.42	6.48	4.19	6.56	8.31	2.14	4.71	4.38	4.735	4.35	6.59	4.75	6.68	6.47	4.74	6.9	5.34	6.73	4.135
99	Metalaxyl	Test	4	6.82	9.05	8.875	8.145	8.145	11.32	11.94	16.21	15.135	17.92	17.055	22.425	22.17	18.53	21.95	49.13	6.52	8.765	7.05	9.295	6.705	15.23	12.77	15.54	13.43	11.98	14.94	12.76	14.66	8.93
100	PF5OHxA	Test	15	6.07	ND	ND	ND	ND	ND	ND	ND	ND	ND	ND	ND	17.27	14.07	18.85	36.61	ND	ND	ND	ND	ND	12.25	10.17	13.16	11.95	10.5	12.31	10.32	12.93	ND
101	Sulfamethoxydiazine	Test	18	4.49	5.75	5.06	4.83	4.635	6.43	6.275	7.455	6.54	9.03	7.96	8.445	9.05	6.63	9.05	14.49	2.87	5.26	4.965	6.165	4.95	9.2	7.36	9.3	7.1	5.04	7.81	6.09	7.56	4.08
102	Sulfamonomethoxine	Calibrant	13	4.65	6.06	5.23	5.02	4.875	6.64	6.63	8.225	7.275	9.83	8.885	9.685	10	7.53	9.99	17.25	3.265	5.39	4.975	6.205	5.005	9.2	7.36	9.46	7.28	5.14	8.46	7.05	8.13	4.205
103	Sulfamethoxypyridazine	Test	13	4.94	6.505	5.595	5.3	5.125	7.06	7.15	9.235	8.195	10.92	9.9	11.125	11.26	8.56	11.38	20.25	3.665	5.73	5.15	6.58	5.125	9.95	8.09	10.05	8.66	6.74	8.46	7.05	8.13	4.95
104	Propetamphos	Test	9	7.3	9.775	10.29	9.495	9.535	12.855	14.12	18.5	17.39	20.13	19.36	26.335	26.56	23.05	26.79	54.88	7.33	10.07	9.15	11.44	8.705	21.42	18.23	21.96	14.27	12.95	16.76	14.82	16.73	10.31
105	Brevianamide F	Test	19	5.43	7.17	6.22	5.785	5.665	7.87	8.03	10.96	9.845	12.66	11.73	13.81	13.47	10.69	13.51	27.07	4.38	6.31	5.135	6.72	5.11	10.07	8.44	10.05	10.8	9.1	10.42	8.58	10.22	6.22
106	Fosthiazate	Test	15	6.59	8.76	8.395	7.67	7.64	10.65	11.215	15.34	14.185	17.085	16.145	20.955	20.37	16.83	20.32	46.05	6.175	8.29	6.85	9.115	6.605	14.87	12.42	15.13	12.98	11.57	14.09	11.95	13.9	8.42
107	Metolachlor	Test	9	7.63	10.125	10.85	9.91	10.015	13.61	14.88	19.26	17.39	20.96	20.01	27.42	28.21	24.39	28.13	56.68	7.625	10.46	9.17	11.36	8.51	21.01	17.61	21.56	14.75	13.4	17.63	15.52	17.48	10.9
108	Penconazole	Test	9	7.75	10.315	11.285	10.45	10.525	13.92	15.585	19.96	18.8	21.58	20.805	28.685	29.18	25.55	29.82	57.79	7.905	10.96	9.13	11.16	8.54	20.4	17.22	21.2	14.9	13.6	18	16.01	18.09	11.3
109	Sulfachloropyridazine	Test	13	4.85	6.29	5.425	5.155	5	6.87	6.91	8.65	7.56	10.33	9.31	10.235	10.62	7.98	10.64	18.33	3.455	5.57	5.23	6.795	5.24	10.37	8.35	10.53	6.82	4.94	7.27	5.56	7.32	4.39
110	Tris(2-chloroethyl) phosphate	Test	15	6.25	8.34	7.75	7.165	7.09	9.8	10.285	14.16	13.095	15.945	15.165	18.965	18.14	14.93	18.49	40.6	5.74	7.775	6.55	8.855	6.445	14.27	12.05	14.59	12.43	10.97	13.02	10.97	12.98	7.77
111	Dibutyl phenyl phosphate	Calibrant	10	7.88	10.51	11.775	10.95	11.07	14.51	16.405	20.735	19.59	22.275	21.515	30.16	31.25	27.95	31.39	60.13	8.19	11.4	9.94	12.025	9.305	23.18	19.85	23.77	15.15	13.96	18.74	16.89	18.62	11.83
112	4-Androsten-3,17-dione	Test	9	7.32	9.67	9.955	9.115	8.915	12.55	13.56	17.95	16.775	19.615	18.405	25.295	25.36	21.52	24.92	53.42	7.095	9.725	8.01	10.26	7.585	17.72	14.73	17.98	14.14	12.74	16.39	14.2	16.02	10
113	Iprobenfos	Test	9	7.68	10.195	11.095	10.235	10.335	13.81	15.335	19.71	18.51	21.315	20.47	28.355	29.16	25.7	29.17	57.83	7.79	10.75	8.97	11.18	8.42	20.57	17.42	21.04	14.81	13.53	17.93	15.96	17.76	11.15
114	Estriol	Test	15	ND	ND	ND	ND	ND	ND	ND	ND	ND	ND	ND	ND	ND	ND	ND	ND	ND	ND	ND	ND	ND	ND	ND	ND	12.55	10.81	12.79	10.79	ND	ND
115	Terbufos	Test	10	8.28	10.955	12.64	11.58	11.765	15.4	17.69	21.96	20.48	23.52	22.585	32.11	33.58	30.28	33.94	62.65	8.535	12	11.505	13.3	10.615	27.56	24.01	27.94	15.74	14.48	19.82	17.98	19.79	12.69
116	Trimethoprim	Calibrant	25	4.37	5.575	4.89	4.775	4.38	6.3	6.04	7.49	6.865	8.885	8.59	8.515	9.25	7.26	9.03	16.16	2.8	5.155	4.55	5.475	4.58	7.9	6.61	7.67	10.22	8.66	9.61	8.09	9.33	5.925
117	Phorate sulfone	Test	15	6.68	8.935	8.695	7.98	7.93	11	11.69	15.9	14.75	17.62	16.785	21.87	21.35	17.75	21.52	47.77	6.33	8.61	7.815	10.33	7.55	17.81	14.89	18.31	13.2	11.79	14.51	12.41	14.47	8.72
118	Triadimefon	Calibrant	9	7.3	9.775	10.245	9.425	9.445	12.795	14.05	18.42	17.24	20.075	19.19	26.175	26.3	22.71	26.43	54.54	7.29	10.01	8.5	10.77	8.075	19.4	16.39	19.86	14.23	12.93	16.7	14.7	16.61	10.285
119	Triadimenol	Test	9	7.42	9.87	10.415	9.625	9.69	13	14.295	18.67	17.57	20.32	19.62	26.565	26.82	23.22	27.28	55.11	7.405	10.195	7.805	10.04	7.405	17.21	14.51	17.67	14.36	13.06	16.95	14.95	16.96	10.445
120	36OPFHpA	Test	15	6.31	ND	ND	ND	ND	ND	ND	ND	ND	ND	ND	ND	19.5	16.24	21.05	43.87	ND	ND	ND	ND	ND	13.34	11.1	14.66	12.48	11.17	13.32	11.43	13.89	ND
121	Deoxynivalenol	Test	1	4.37	5.31	4.905	4.565	4.485	6.27	5.86	6.24	4.995	7.895	6.825	6.785	7.48	4.62	7.98	9.69	2.645	5.08	ND	5.01	4.45	6.88	4.89	6.75	7.53	5.34	7.75	5.94	7.61	4.91
122	Imazalil	Calibrant	4	7.16	9.345	9.265	8.54	9.385	11.845	12.41	16.58	15.615	18.48	18.79	22.795	22.89	19.25	23.44	49.59	6.3	8.53	6.925	8.235	5.965	12.73	11.76	12.63	14.95	13.67	18.18	16.2	18.16	11.43
123	Quinalphos	Test	10	7.75	10.335	11.26	10.235	10.29	13.905	15.545	19.91	18.555	21.57	20.48	28.57	29.11	25.48	29.53	57.77	7.765	10.77	9.725	11.85	9.03	22.6	19.23	23.28	14.9	13.55	18	15.96	18.02	11.3
124	FBSA	Test	9	6.74	ND	ND	ND	ND	ND	ND	ND	ND	ND	ND	ND	22.31	18.86	23.11	49.03	ND	ND	ND	ND	ND	16.84	14.19	17.4	12.94	11.56	14.1	12.07	14.21	ND
125	Ditalimfos	Test	9	7.55	10.05	10.695	9.685	9.685	13.27	14.665	19.03	17.58	20.745	19.66	27.05	27.35	23.54	27.78	55.66	7.415	10.25	9.135	11.38	8.58	21.17	17.94	21.78	14.55	13.21	17.24	15.15	17.31	10.73
126	Codeine	Calibrant	7	4.01	4.775	4.405	4.295	4.14	5.765	5.02	5.455	4.76	6.83	6.27	5.75	6.75	4.94	6.64	9.29	2.27	4.79	4.32	4.895	4.37	6.83	5.52	6.69	10.24	8.71	9.83	8.11	9.64	6.84
127	Hydrocodone	Test	7	4.2	5.2	4.665	4.57	4.435	6.02	5.55	6.415	5.95	7.82	7.33	7.12	7.88	6.2	7.84	12.09	2.615	4.99	4.52	5.38	4.56	7.74	6.56	7.57	10.9	9.42	10.67	8.74	10.17	7.165
128	Perfluorobutanesulfonic acid	Test	14	5.93	8.3	7.73	7.155	6.865	9.21	10.28	14.16	13.04	15.955	14.8	18.975	16.91	13.89	18.37	36.61	5.685	7.835	6.19	8.87	6.435	14.12	11.45	16.53	11.81	10.43	12.08	10.19	12.62	7.15
129	Sulfaquinoxaline	Test	14	5.61	7.52	6.565	6.125	5.94	8.28	8.595	12.11	11.13	13.75	12.865	15.815	14.8	12.18	14.87	32.4	4.81	6.7	5.715	7.845	5.655	12.12	10.24	12.23	9.73	7.86	9.39	7.84	9.01	5.265
130	Allethrin	Test	10	8.28	10.9	12.555	11.64	11.785	15.35	17.57	21.84	20.575	23.37	22.565	31.935	33.54	30.32	33.67	62.65	8.55	12.05	11.32	13.285	10.47	27.07	23.47	27.59	15.76	14.53	19.75	17.94	19.62	12.61
131	Pipemidic acid	Test	24	ND	5.7	4.945	4.57	4.24	6.28	6.135	7.705	6.235	9.145	7.185	8.865	ND	ND	ND	ND	2.62	5.055	4.45	5.22	4.395	ND	ND	ND	6.82	5.07	7.12	5.56	6.95	4.385
132	Triallate	Test	5	8.54	11.215	13.085	12.005	12.27	15.875	18.315	22.56	21.075	24.13	23.235	33.065	34.67	31.36	35.29	63.82	8.805	12.4	12.2	13.885	11.08	29.02	25.22	29.94	16.08	14.75	20.34	18.47	20.44	13.125
133	Pirimiphos-methyl	Test	10	7.95	10.585	11.79	10.74	10.925	14.535	16.36	20.71	19.23	22.34	21.37	29.94	30.98	27.48	31.27	59.82	8.025	11.08	10.69	11.985	9.1	23.18	19.42	23.95	15.24	13.96	18.76	16.83	18.78	11.85
134	Butyl diphenyl phosphate	Test	10	7.77	10.39	11.57	10.73	10.84	14.25	16.09	20.44	19.275	21.97	21.185	29.69	30.56	27.32	30.77	59.4	8.05	11.195	9.885	12.035	9.26	23.22	19.93	23.82	15.02	13.8	18.45	16.59	18.35	11.62
135	Tebuconazole	Test	9	7.75	10.315	11.32	10.45	10.57	13.985	15.68	20.04	18.84	21.645	20.88	28.895	29.56	26.07	30.09	58.24	7.885	10.96	8.8	10.915	8.22	19.73	16.75	20.34	14.9	13.62	18.11	16.16	18.16	11.35
136	Quinoxyfen	Test	10	8.54	11.25	13.12	12	12.15	15.81	18.355	22.6	21.055	24.18	23.14	33.115	34.35	30.92	35.21	63.44	8.745	12.34	11.4	12.71	9.93	25.18	21.42	26.56	16.03	14.68	20.23	18.33	20.44	13.16
137	Fensulfothion	Test	4	6.73	9.04	8.895	8.255	8.115	11.145	12.035	16.37	15.405	17.995	17.16	22.805	22.06	18.63	22.2	49.2	6.53	8.88	7.145	9.5	6.985	15.76	13.35	16.09	13.26	11.93	14.74	12.74	14.68	8.93
138	Tripentyl phosphate	Test	5	8.67	11.32	13.49	12.67	12.85	16.33	19.05	23.17	22.06	24.605	23.94	34.37	36.42	33.55	36.58	65.77	9.09	12.965	12.28	13.91	11.315	29.16	25.47	29.94	16.27	15.01	20.9	19.21	20.71	13.55
139	Sulfadoxine	Test	20	5.01	6.545	5.595	5.315	5.195	7.065	7.18	9.39	8.455	11.015	10.085	11.435	11.49	8.89	11.39	21.41	3.82	5.755	5.3	6.99	5.29	10.69	8.73	10.79	7.99	5.75	8.04	6.6	7.65	4.18
140	Sulfadimethoxine	Test	14	5.47	7.35	6.36	5.935	5.775	8.05	8.315	11.66	10.66	13.3	12.41	15.095	14.27	11.65	14.25	30.66	4.6	6.49	5.725	7.83	5.675	12.14	10.22	12.28	9.9	7.94	9.63	8	9.12	5.285
141	Edifenphos	Test	10	7.75	10.31	11.295	10.4	10.49	13.99	15.645	20.02	18.775	21.605	20.7	28.89	29.67	26.17	29.79	58.37	7.87	10.92	9.455	11.64	8.785	21.89	18.61	22.42	14.9	13.62	18.13	16.2	18.02	11.35
142	Fenamidone	Test	9	7.09	9.495	9.745	8.98	9.065	12.24	13.305	17.67	16.6	19.315	18.605	24.975	24.93	21.41	25.05	52.94	7.05	9.58	8.335	10.715	7.96	19.2	16.2	19.65	13.93	12.6	16.04	14.07	15.95	9.77
143	Butachlor	Test	5	8.43	ND	ND	ND	ND	ND	ND	ND	ND	ND	ND	ND	34.12	31.03	34.25	63.34	ND	ND	ND	ND	ND	27.74	24.02	28.2	15.9	14.62	20.05	18.26	19.91	ND
144	Pretilachlor	Test	10	8.17	10.78	12.225	11.265	11.45	15.1	17.035	21.36	20.01	22.935	22.065	31.045	32.57	29.1	32.59	61.59	8.385	11.7	10.795	12.8	9.895	25.48	21.77	26.02	15.57	14.28	19.42	17.52	19.27	12.28
145	Aflatoxin B1	Test	15	6.19	8.26	7.575	6.815	6.7	9.625	10.085	14.195	12.895	15.765	14.695	19.31	18.14	15.09	17.91	42.23	5.46	7.44	6.16	8.45	5.985	13.22	11.26	13.3	12.31	10.92	12.89	10.89	12.52	7.615
146	Nivalenol	Test	6	3.74	3.71	4.235	3.635	3.545	5.505	4.56	3.74	2.555	5.095	3.92	3.69	5.35	2.51	5.68	6.07	1.93	4.6	3.58	4.7	4.195	5.51	2.95	5.64	6.02	4.28	6.46	4.96	6.48	4.25
147	Isoxathion	Test	10	7.82	10.455	11.655	10.725	10.83	14.275	16.23	20.57	19.27	22.105	21.235	29.86	30.65	27.34	31.07	59.54	8.025	11.21	10.53	12.605	9.845	25.08	21.77	25.64	15.04	13.82	18.47	16.64	18.5	11.7
148	Triazophos	Test	9	7.34	9.835	10.395	9.575	9.595	12.95	14.31	18.7	17.55	20.3	19.485	26.705	26.91	23.41	27.13	55.33	7.345	10.15	9	11.32	8.54	21.01	17.92	21.52	14.29	13.01	16.9	14.95	16.83	10.435
149	Kresoxim-methyl	Calibrant	10	7.68	10.265	11.22	10.235	10.38	13.805	15.5	19.88	18.5	21.505	20.56	28.585	29.09	25.6	29.51	57.72	7.79	10.77	9.6	11.82	9.035	22.58	19.37	23.1	14.81	13.53	17.91	15.94	17.95	11.255
150	Perfluorohexanoic acid	Test	15	6.38	8.91	8.735	8.09	7.79	10.405	11.805	16.035	14.97	17.735	16.655	22.21	20.15	16.91	21.69	45.47	6.405	8.78	5.985	8.64	6.185	13.6	11.27	14.92	12.6	11.34	13.61	11.7	14.19	8.17
151	Aflatoxin B2	Test	15	6.06	8.055	7.27	6.55	6.425	9.255	9.625	13.63	12.325	15.185	14.095	18.37	17.19	14.24	16.91	39.71	5.235	7.15	5.93	8.115	5.74	12.55	10.68	12.51	12.05	10.61	12.4	10.41	12	7.3
152	Sulfaphenazole	Test	20	5.27	7.08	6.07	5.68	5.53	7.665	7.865	10.975	9.94	12.57	11.63	14.01	13.4	10.83	13.26	27.98	4.325	6.205	5.765	7.985	5.765	12.41	10.42	12.59	9.1	6.91	8.97	7.45	8.51	4.885
153	Butifos	Test	5	8.94	11.535	13.76	12.745	12.98	16.68	19.405	23.51	22.155	25.035	24.16	34.845	37.07	34.06	37.29	66.41	9.14	13.05	12.935	14.51	11.65	31.02	27.12	31.78	16.54	15.2	21.3	19.49	21.07	13.82
154	Dichlofenthion	Test	10	8.35	11.085	12.89	11.84	12.05	15.58	18.06	22.3	20.835	23.855	22.97	32.72	34.01	30.82	34.8	63.16	8.675	12.22	ND	ND	ND	27.86	24.31	27.94	15.83	14.59	20	18.18	20.12	12.93
155	PFEESA	Test	15	6.13	ND	ND	ND	ND	ND	ND	ND	ND	ND	ND	ND	18.57	15.5	20.01	42.03	ND	ND	ND	ND	ND	15.22	12.23	18.18	12.21	10.93	12.85	11.02	13.36	ND
156	Bupirimate	Test	9	7.63	10.155	10.99	10.1	10.195	13.675	15.16	19.53	18.285	21.14	20.295	28.01	28.67	25.1	28.79	57.3	7.485	10.16	9.505	9.76	7.1	16.62	17.22	17.13	14.75	13.47	17.78	15.82	17.68	11.065
157	Zearalenone	Test	9	7.43	9.885	10.435	9.535	9.465	13.035	14.305	18.695	17.43	20.335	19.35	26.645	26.81	23.06	27.07	55.15	7.275	10.1	8.13	10.53	7.65	18.39	15.53	18.86	14.35	13	16.93	14.83	16.86	10.415
158	Tebupirimfos	Test	10	8.35	10.99	12.7	11.65	11.855	15.525	17.75	22.02	20.575	23.59	22.68	32.225	33.88	30.62	34.13	63	8.59	12.06	11.66	13.515	10.675	27.95	24.25	28.58	15.81	14.55	19.94	18.1	19.89	12.74
159	Norfloxacin	Test	3	ND	6.245	5.25	5.03	4.885	6.71	6.78	9.04	7.985	10.48	9.55	11.15	ND	ND	ND	ND	3.28	5.375	4.59	5.675	4.56	ND	ND	ND	12.43	10.98	12.94	10.91	12.94	7.82
160	Enoxacin	Test	25	ND	6.13	5.16	4.935	4.8	6.58	6.665	8.805	7.645	10.24	9.26	10.82	ND	ND	ND	ND	3.025	5.26	4.55	5.56	4.52	ND	ND	ND	ND	ND	ND	ND	ND	5.68
161	Zearalanone	Test	4	6.98	9.34	9.435	8.565	8.45	11.86	12.825	17.205	15.97	18.815	17.835	24.235	23.8	20.18	23.97	51.53	6.67	9.185	6.665	9.11	6.415	14.55	12.41	14.74	13.66	12.34	15.54	13.51	15.46	9.42
162	α-Zearalenol	Test	9	7.33	9.725	10.16	9.345	9.19	12.73	13.91	18.31	17.255	19.915	18.99	26.07	26.08	22.57	26.51	54.3	7.125	9.97	7.2	9.66	6.895	15.93	13.55	16.19	14.26	12.91	16.55	14.58	16.49	10.135
163	β-Zearalenol	Test	9	7.33	9.785	10.25	9.4	9.305	12.81	14.035	18.44	17.255	20.055	19.115	26.22	26.31	22.57	26.51	54.55	7.19	9.98	8.04	10.46	7.595	18.19	15.37	18.66	14.26	12.91	16.69	14.58	16.62	10.245
164	Terbufos sulfone	Test	9	7.07	9.44	9.595	8.765	8.795	12.11	13.06	17.41	16.17	19.08	18.2	24.46	24.45	20.81	24.38	52.34	6.885	9.37	8.645	11.02	8.25	20.14	17.03	20.58	13.86	12.51	15.9	13.84	15.74	9.62
165	Pyriproxyfen	Test	10	8.35	11.08	12.91	11.765	12.01	15.59	18.105	22.35	20.765	23.875	22.89	32.81	34.12	30.96	34.85	63.27	8.61	12.15	11.54	13.305	10.475	27.28	23.76	28.12	15.83	14.59	20	18.23	20.17	12.96
166	Sulfotep	Test	10	7.63	10.25	11.24	10.33	10.44	13.905	15.59	19.95	18.665	21.535	20.675	28.79	29.56	26.23	29.68	58.33	7.82	10.85	10.245	12.425	9.69	24.53	21.23	24.95	14.83	13.6	18.05	16.16	17.95	11.275
167	α-Zearalanol	Test	4	6.81	9.15	9.105	8.295	8.16	11.47	12.345	16.71	15.55	18.32	17.325	23.435	22.83	19.31	22.94	50.34	6.515	8.935	6.58	9.01	6.36	14.32	12.23	14.5	13.44	12.08	15.08	13.02	14.99	9.1
168	β-Zearalanol	Test	9	7.15	9.595	9.92	9.115	8.97	12.455	13.58	17.98	16.84	19.57	18.645	25.54	25.43	21.83	25.65	53.57	6.99	9.705	7.09	9.55	6.79	15.64	13.3	15.85	14	12.71	16.27	14.24	16.18	9.91
169	Chloramphenicol	Test	8	ND	7.405	6.535	6.08	5.9	8.24	8.43	11.15	9.815	13.115	12.03	13.765	ND	ND	ND	ND	4.565	6.615	5.49	7.46	5.37	ND	ND	ND	ND	ND	ND	ND	ND	6.52
170	Flutolanil	Test	9	7.16	9.615	10.03	9.275	9.315	12.555	13.765	18.15	17.08	19.75	19.035	25.825	25.95	22.49	26.11	54.2	7.185	9.87	8.915	11.285	8.565	21.01	17.96	21.47	14.07	12.81	16.44	14.49	16.34	10.05
171	Sterigmatocystin	Test	9	7.61	10.145	10.855	9.76	9.715	13.455	14.88	19.27	17.745	20.94	19.715	27.45	27.7	23.85	28.04	56.08	7.445	10.335	8.56	10.81	7.92	19.36	16.28	19.93	14.68	13.29	17.45	15.28	17.42	10.885
172	Triphenyl phosphate	Test	10	7.74	10.34	11.455	10.6	10.7	14.09	15.93	20.285	19.115	21.805	20.985	29.455	30.18	26.93	30.4	59.01	7.975	11.08	9.915	12.09	9.29	23.37	20.09	23.9	14.93	13.7	18.23	16.41	18.17	11.505
173	Gliotoxin	Test	15	6.27	8.33	7.685	6.945	6.89	9.775	10.185	14.2	12.945	15.885	14.93	19.16	18.21	15	18.27	41.68	5.545	7.56	5.93	8.015	5.705	12.39	10.51	12.41	12.43	10.94	13	10.91	12.82	7.7
174	Tris(1-chloropropyl) phosphate	Test	9	7.07	9.475	9.735	9.02	9.03	12.21	13.295	17.665	16.64	19.285	18.585	24.985	24.82	21.36	25.1	52.83	7.025	9.595	7.85	10.235	7.585	17.81	15.12	18.26	13.86	12.58	15.97	14.02	15.96	9.745
175	Tris(3-chloropropyl) phosphate	Test	9	7.2	9.61	9.97	9.205	9.26	12.55	13.65	18.025	16.92	19.68	18.91	25.555	25.7	22.23	25.83	53.82	7.175	9.785	8.07	10.42	7.72	18.38	15.58	18.75	14.07	12.79	16.41	14.43	16.3	10.005
176	4:2FTS	Test	15	6.34	ND	ND	ND	ND	ND	ND	ND	ND	ND	ND	ND	19.7	16.44	21.35	44.53	ND	ND	ND	ND	ND	12.51	10.58	13.63	12.51	11.24	13.42	11.51	14.05	ND
177	Aflatoxin G1	Test	14	5.81	7.78	6.89	6.275	6.155	8.765	9.09	12.96	11.76	14.515	13.53	17.31	16.15	13.49	15.9	37.12	5.005	6.865	5.89	8.12	5.765	12.58	10.7	12.59	11.68	10.28	11.79	9.89	11.41	6.91
178	HFPO-DA	Test	9	6.47	ND	ND	ND	ND	ND	ND	ND	ND	ND	ND	ND	21.28	18.07	22.7	47.76	ND	ND	ND	ND	ND	14.37	11.9	16.04	12.86	11.62	14.08	12.24	14.6	ND
179	Aflatoxin G2	Test	14	5.63	7.78	6.575	6.01	5.895	8.385	8.645	12.345	11.14	13.875	12.85	16.31	15.2	12.67	14.92	34.4	4.75	6.57	5.66	7.775	5.55	11.89	10.07	11.87	11.37	9.93	11.28	9.41	10.86	6.61
180	Fenarimol	Test	9	7.48	10	10.66	9.85	9.865	13.19	14.665	19.05	17.92	20.68	19.86	27.205	27.29	23.63	27.78	55.7	7.53	10.4	8.29	10.49	7.83	18.43	15.52	18.95	14.48	13.15	17.15	15.13	17.22	10.68
181	Ciprofloxacin	Test	25	ND	6.345	5.31	5.095	4.945	6.78	6.905	9.32	8.245	10.79	9.81	11.635	ND	ND	ND	ND	3.405	5.44	4.63	5.78	4.595	ND	ND	ND	ND	ND	ND	ND	ND	5.705
182	Isofenphos-methyl	Test	10	7.68	10.225	11.17	10.255	10.4	13.9	15.48	19.85	18.56	21.445	20.585	28.645	29.56	26.17	29.51	58.29	7.79	10.78	10.09	12.285	9.455	24.04	20.7	24.45	14.83	13.6	18.06	16.14	17.87	11.22
183	Tetramethrin	Test	10	8.22	10.885	12.35	11.375	11.55	15.13	17.245	21.54	20.205	23.225	22.23	31.455	32.84	29.53	33.11	61.88	8.4	11.81	11.115	13.205	10.29	26.64	23.11	27.14	15.64	14.32	19.47	17.62	19.41	12.405
184	Spectinomycin	Test	2	ND	0.93	1.39	1.38	1.28	1.435	1.385	0.925	0.925	1.37	1.305	0.93	ND	ND	ND	ND	0.9	1.495	1.375	0.665	1.475	ND	ND	ND	ND	ND	ND	ND	ND	4.19
185	Tebufenpyrad	Test	10	8.22	10.905	12.56	11.62	11.795	15.315	17.595	21.86	20.57	23.37	22.545	32.03	33.42	30.19	33.76	62.47	8.54	12.03	10.94	12.86	10.01	25.68	22.11	26.41	15.68	14.41	19.69	17.87	19.66	12.615
186	2-NP-AMOZ	Test	3	5.36	6.92	6.04	5.44	5.65	7.725	7.695	10.1	8.35	11.905	10.755	12.445	12.45	9.77	12.33	23.53	2.775	5.17	5.29	5.665	4.695	8.28	6.83	8.13	11.62	10.16	11.67	9.71	11.37	6.88
187	Fenbuconazole	Test	9	7.47	10.045	10.86	10.055	10.12	13.39	15.03	19.42	18.32	20.96	20.25	27.945	28.22	24.86	28.75	56.81	7.62	10.6	8.9	11.13	8.42	20.4	17.44	20.96	14.53	13.29	17.44	15.54	17.48	10.885
188	Erucamide	Test	5	9.09	13.155	15.69	14.66	14.94	18.885	22.3	26.215	24.83	27.92	27.005	39.21	42.05	39.43	42.53	71.79	10.27	14.835	16.12	17.025	14.78	38.48	34.48	39.98	18.65	16.78	23.88	21.94	23.94	15.795
189	15-AcDON	Test	19	5.49	7.15	6.225	5.715	5.665	7.955	8.025	10.79	9.46	12.555	11.44	13.48	13.51	10.65	13.32	27	4.32	6.22	5.24	6.75	5.145	10.17	8.4	10.06	10.84	9.1	10.48	8.62	10.22	6.225
190	Piperonyl butoxide	Test	10	8.37	11.03	12.78	11.69	11.925	15.615	17.89	22.15	20.65	23.695	22.73	32.45	34.14	30.92	34.32	63.27	8.605	12.09	11.24	13.16	10.215	26.76	23.11	27.32	15.88	14.59	20.05	18.23	19.96	12.83
191	3-Methylphenyl diphenyl phosphate	Test	10	7.95	10.62	12.055	11.175	11.3	14.725	16.85	21.15	19.935	22.65	21.835	30.905	31.99	28.82	32.25	60.96	8.28	11.6	10.57	12.63	9.81	25.08	21.7	25.64	15.29	14.07	19.03	17.23	18.95	12.105
192	Thiophanate-methyl	Calibrant	15	6.24	8.305	7.67	6.915	6.88	9.68	10.17	14.125	12.745	15.81	14.865	18.98	18.04	14.82	18.2	40.94	5.5	7.525	6.29	8.57	6.115	13.62	11.49	13.75	12.34	10.91	12.93	10.84	12.77	7.675
193	Carbophenothion (peak2)	Test	5	8.48	11.225	13.23	12.16	12.41	15.94	18.6	22.79	21.345	24.27	23.44	33.98	35.2	32.14	35.09	64.4	8.83	12.54	ND	ND	ND	28.99	25.56	29.64	16.03	14.8	20.44	18.69	20.31	13.015
194	Boscalid	Test	9	7.16	9.605	9.955	9.105	9.17	12.41	13.615	18	16.775	19.615	18.775	25.49	25.36	21.76	25.68	53.45	7.085	9.7	8.51	10.875	8.04	19.57	16.52	20.07	13.99	12.67	16.26	14.25	16.25	9.97
195	Oxadiazon	Test	5	8.28	10.955	12.705	11.745	11.975	15.51	17.81	22.07	20.735	23.57	22.805	32.37	34.01	30.82	34.3	63.09	8.625	12.14	ND	13.4	10.71	27.92	24.39	28.54	15.76	14.55	19.92	18.16	19.87	12.75
196	Isofenphos	Test	10	7.84	10.46	11.685	10.74	10.93	14.455	16.27	20.61	19.305	22.165	21.315	29.945	31.18	27.93	31.11	60.08	8.07	11.22	10.705	12.8	9.965	25.72	22.29	26.08	15.15	13.94	18.69	16.87	18.5	11.725
197	Cefalexin	Test	24	ND	5.44	4.875	4.61	4.32	6.185	6	7.225	6.015	8.675	8.23	7.765	ND	ND	ND	ND	3.16	5.36	4.34	5.42	4.525	ND	ND	ND	ND	ND	ND	ND	ND	5.13
198	Cefradine	Test	25	ND	6.02	5.195	5.01	4.525	6.58	6.61	8.3	7.37	9.9	9.285	9.615	ND	ND	ND	ND	3.665	5.635	4.405	5.64	4.59	ND	ND	ND	ND	ND	ND	ND	ND	5.395
199	PFPeS	Test	9	6.38	ND	ND	ND	ND	ND	ND	ND	ND	ND	ND	ND	20.65	17.56	22.11	47	ND	ND	ND	ND	ND	16.45	13.18	20.03	12.68	11.44	13.78	11.94	14.3	ND
200	Lomefloxacin	Test	25	ND	6.45	5.39	5.165	5.045	6.93	7.04	9.63	8.605	11.135	10.235	12.105	ND	ND	ND	ND	3.61	5.515	4.64	5.895	4.655	ND	ND	ND	ND	ND	ND	ND	ND	5.39
201	AltertoxinⅠ	Test	4	6.74	9.03	8.845	7.715	7.71	11.05	11.89	16.17	14.415	17.845	16.59	22.435	21.46	17.83	21.83	48.01	6.065	8.355	6.36	8.64	5.99	13.5	11.51	13.61	13.24	11.83	14.57	12.44	14.56	8.825
202	Piperophos	Test	10	8.02	10.635	12.02	11.09	11.24	14.84	16.775	21.09	19.8	22.615	21.78	30.71	32.12	28.82	32.05	61.1	8.25	11.54	10.665	12.685	9.82	25.22	21.72	25.6	15.37	14.14	19.11	17.29	18.93	12.07
203	Fusarenon-X	Test	13	4.78	6.21	5.375	5.075	4.98	6.845	6.835	8.53	7.33	10.185	9.15	10.055	10.54	7.82	10.42	18.47	3.41	5.51	4.765	ND	ND	8.42	6.78	8.35	9.29	7.49	8.9	7.38	8.57	5.385
204	Thiamphenicol	Test	24	ND	5.535	5.005	4.62	4.585	6.365	6.145	6.955	5.83	8.56	7.52	7.655	ND	ND	ND	ND	2.85	5.19	4.815	5.93	4.85	ND	ND	ND	ND	ND	ND	ND	ND	5.03
205	Danofloxacin	Test	3	4.72	6.415	5.34	5.12	4.95	6.78	6.965	9.615	8.545	11.025	10.08	12.155	11.54	9.65	11.4	24.02	3.485	5.44	4.67	5.925	4.625	8.56	7.5	8.24	11.52	10.36	11.51	10.06	11.23	7.25
206	Florfenicol	Test	13	5.02	6.455	5.595	5.255	5.155	7.065	7.11	9	7.785	10.765	9.685	10.715	11.2	8.45	11.14	19.67	3.63	5.7	5.37	7.175	5.395	10.99	9	11.08	9.7	7.86	9.24	7.68	8.98	5.58
207	Enrofloxacin	Test	3	4.85	6.53	5.47	5.205	5.13	6.92	7.13	9.82	8.79	11.27	10.31	12.46	11.81	9.96	11.82	24.53	3.54	5.485	4.77	6.02	4.72	8.83	7.82	8.47	13.61	12.14	15.15	13.02	15.45	9.315
208	Chlorthiophos	Test	5	8.54	11.26	13.275	12.21	12.415	15.99	18.67	22.86	21.405	24.34	23.45	33.69	35.29	32.2	35.95	64.53	8.85	12.58	ND	ND	ND	28.99	25.49	29.43	16.1	14.86	20.49	18.75	20.14	13.325
209	Ofloxacin	Calibrant	3	4.58	6.1	5.15	4.965	4.83	6.57	6.58	8.705	7.78	10.145	9.23	10.675	10.54	8.54	10.44	20.19	3.11	5.285	4.59	5.695	4.57	8.47	7.13	7.91	11.76	10.1	11.74	9.67	11.31	7.125
210	Oxyfluorfen	Test	10	8.09	10.81	12.495	11.6	11.785	15.145	17.505	21.76	20.555	23.21	22.525	31.955	33.19	30.16	33.69	62.29	8.505	11.99	ND	ND	ND	27.2	23.95	27.1	15.51	14.33	19.52	17.79	19.51	12.515
211	Bezafibrate	Calibrant	9	6.9	9.365	9.515	8.63	8.255	11.82	13	17.415	16.125	18.975	17.535	24.605	24.03	20.69	24.28	51.99	6.975	9.65	6.81	9.775	7.065	16.52	14.06	16.82	12.66	11.36	13.65	11.75	13.98	8.12
212	2-Ethylhexyl diphenyl phosphate	Test	5	8.56	11.265	13.41	12.525	12.715	16.225	18.935	23.06	21.87	24.48	23.77	34.205	36.18	33.34	36.33	65.49	9.005	12.84	12.49	14.21	11.48	30.18	26.58	30.73	16.17	14.94	20.78	19.1	20.6	13.465
213	Hydrocorticosterone	Calibrant	4	6.67	8.83	8.495	7.69	7.59	10.775	11.41	15.665	14.44	17.3	16.33	21.58	20.85	17.33	20.84	47.11	6.11	8.33	5.785	7.925	5.57	12.13	10.48	11.98	13.07	11.67	14.27	12.18	16.64	8.52
214	Perfluoroheptanoic acid	Test	9	6.74	9.405	9.67	9.06	8.8	11.53	13.28	17.66	16.755	19.23	18.325	25.125	23.48	20.35	24.95	51.18	7.02	9.71	6.59	9.57	6.855	15.66	12.81	17.69	13.32	12.12	15.04	13.23	15.56	9.155
215	Pyridaben	Test	5	8.83	11.505	13.75	12.73	12.955	16.59	19.41	23.51	22.145	24.99	24.115	34.88	36.94	33.95	37.24	66.34	9.115	13.05	12.675	14.325	11.505	30.51	26.89	31.14	16.47	15.18	21.19	19.46	21.06	13.8
216	Diacetoxyscirpenol	Test	15	6.21	8.23	7.555	6.975	6.945	9.69	10.03	14.06	13.095	15.705	14.935	19.03	18.27	15.15	17.91	42.44	5.665	7.585	6.065	8.23	5.875	12.8	10.94	12.85	12.36	10.94	12.94	10.97	12.58	7.59
217	Anilofos	Test	10	7.68	10.275	11.295	10.455	10.57	13.985	15.68	20.04	18.895	21.595	20.86	28.98	29.83	26.45	29.97	58.56	7.87	10.96	9.885	12.07	9.275	23.3	20.01	23.82	14.88	13.62	18.13	16.22	18.02	11.345
218	Tris(4-methylphenyl) phosphate	Test	5	8.37	11.095	13.065	12.125	12.24	15.8	18.415	22.585	21.195	24.01	23.23	33.17	35	31.88	35.06	64.22	8.79	12.475	11.81	13.63	10.84	28.32	24.89	28.93	15.94	14.73	20.3	18.6	20.19	13.13
219	Fleroxacin	Test	13	4.51	5.985	5.13	4.9	4.75	6.5	6.49	8.33	7.335	9.815	8.815	10.065	10.04	8.07	10.04	18.55	2.835	5.215	4.62	5.7	4.6	8.26	7.13	7.97	7.28	5.14	7.99	6.32	7.65	6.78
220	Ochratoxin B	Test	9	6.52	8.9	8.7	7.895	7.465	10.8	11.81	16.19	14.985	17.715	16.26	22.67	21.49	18.32	21.78	48.78	6.64	9.135	6.305	9.47	6.77	15.65	13.35	15.92	11.99	10.73	12.48	10.69	12.63	7.325
221	Bis(2-ethylhexyl) adipate	Test	5	8.23	12.575	15.175	14.13	14.42	18.375	21.58	25.515	24.075	27.065	26.18	38.21	41.21	38.54	41.18	70.9	9.945	14.325	15.5	16.685	14.105	37.84	34.64	37.86	18.11	16.42	23.26	21.47	22.91	15.255
222	Pyrazophos	Test	10	7.95	10.59	11.86	10.74	10.865	14.61	16.485	20.82	19.27	22.41	21.315	30.2	31.29	27.83	31.47	60.2	8.04	11.22	10.09	12.22	9.31	23.81	20.44	24.33	15.24	14.01	18.83	16.89	18.78	11.9
223	Etofenprox	Calibrant	5	9.35	11.93	14.39	13.21	13.545	17.265	20.4	24.41	22.82	25.94	24.95	36.405	38.74	35.97	39.2	68.24	9.385	13.48	13.48	15.05	12.26	32.82	29.45	33.25	17.01	15.63	21.97	20.28	21.85	14.445
224	NaDONA	Test	9	6.74	ND	ND	ND	ND	ND	ND	ND	ND	ND	ND	ND	23.82	20.77	25.24	51.7	ND	ND	ND	ND	ND	16.5	13.5	18.89	13.34	12.18	15.14	13.44	15.66	ND
225	Neosolaniol	Test	19	4.85	6.39	5.45	5.21	5.125	6.94	6.975	9.115	8.26	10.695	9.895	11.13	11.22	8.79	10.95	21.44	3.715	5.61	4.87	6.115	4.855	9	7.39	8.92	9.59	7.89	9.06	7.64	8.71	5.45
226	Furathiocarb	Test	20	4.87	ND	ND	ND	ND	ND	ND	ND	ND	ND	ND	ND	11.87	9.69	11.8	24.17	ND	ND	ND	ND	ND	8.77	7.64	8.45	7.16	5.16	7.93	6.72	7.54	ND
227	Sarafloxacin	Test	19	4.78	6.66	5.58	5.37	5.2	7.17	7.28	10.17	9.3	11.66	10.84	12.98	10.54	7.82	10.41	18.47	3.88	5.765	4.875	6.37	4.85	8.42	6.78	8.35	9.29	7.49	8.9	7.38	8.57	5.8
228	Roquefortine C	Test	4	7.09	9.32	9.305	8.58	8.975	11.87	12.53	16.79	15.84	18.56	18.465	23.285	23.34	19.7	23.65	50.53	6.425	8.785	6.38	8.06	5.71	12.32	11.19	11.91	14.29	12.99	16.83	14.77	16.78	10.35
229	8-Methylnonyl diphenyl phosphate	Test	5	9.01	11.645	14.06	13.19	13.405	16.935	19.97	23.955	22.77	25.405	24.665	35.775	38.13	35.4	38.28	67.58	9.34	13.43	13.55	15.025	12.435	32.88	29.38	33.41	16.69	15.39	21.61	19.95	21.35	14.135
230	DNOP	Test	5	8.61	12.515	15.125	14.3	14.62	18.285	21.5	25.435	24.305	26.975	26.47	38.1	41.59	39	41.74	71.33	10.04	14.495	15.765	16.63	14.335	38.25	35.16	38.45	18.32	16.58	23.52	21.68	23.41	15.485
231	Permethrin (peak2)	Test	10	9.14	11.78	14.22	13.19	13.49	17.06	20.175	24.19	22.8	25.675	24.845	36.095	38.31	35.62	38.78	67.79	9.36	13.46	ND	ND	ND	ND	ND	ND	16.8	15.5	21.74	20.07	21.62	14.275
232	Sparfloxacin	Test	14	5.2	7.03	5.92	5.575	5.425	7.6	7.775	11.225	10.22	12.685	11.825	14.68	13.85	11.79	13.47	31.18	4.245	6.03	4.88	6.42	4.845	9.44	8.37	9.1	11.22	9.89	11.03	9.37	11.41	6.635
233	Dexamethasone	Test	4	6.9	9.18	9.165	8.33	8.26	11.575	12.45	16.815	15.63	18.4	17.52	23.585	23.17	19.68	23.14	50.75	6.54	8.98	6.29	8.605	6.015	13.48	11.63	13.44	13.5	12.19	15.28	13.24	15.06	9.19
234	Ergocalciferol	Test	5	9.97	ND	ND	ND	ND	ND	ND	ND	ND	ND	ND	ND	44.31	41.45	44.96	74.09	ND	ND	ND	ND	ND	32.95	38.57	32.54	18.59	18.03	25.9	23.28	26.1	ND
235	Sucralose	Test	25	4.94	6.39	5.555	5.12	5.07	6.98	7.03	8.785	7.185	10.555	9.35	10.39	10.76	7.99	10.97	18.18	3.36	5.565	4.765	5.84	4.73	8.55	6.98	8.46	9.5	7.6	9.08	7.52	8.91	5.545
236	Tris(2-butoxyethyl) phosphate	Test	10	8.15	10.785	12.385	11.535	11.725	15.2	17.355	21.615	20.455	23.125	22.41	31.7	33.31	30.22	33.31	62.4	8.51	11.92	10.66	12.6	9.875	24.98	21.52	25.58	15.57	14.34	19.58	17.82	19.41	12.445
237	FHxSA	Test	9	7.33	ND	ND	ND	ND	ND	ND	ND	ND	ND	ND	ND	28.16	25.05	28.9	56.78	ND	ND	ND	ND	ND	20.94	18.1	21.6	14.19	13.04	16.82	15.05	16.92	ND
238	Difloxacin	Test	3	5.07	6.755	5.71	5.41	5.34	7.31	7.405	10.31	9.35	11.835	10.955	13.19	12.72	10.74	12.61	27.18	3.77	5.675	4.93	6.445	4.885	9.53	8.49	9.21	13.35	11.93	14.7	12.68	14.7	8.865
239	Perfluorohexanesulfonic acid	Test	9	6.71	9.4	9.67	9.13	8.87	11.53	13.31	17.725	16.92	19.265	18.44	25.29	26.39	20.65	25.08	51.57	7.055	9.765	7.545	10.81	7.895	18.78	14.97	23.71	13.27	12.15	15.06	13.34	15.56	9.2
240	Moxifloxacin	Test	8	ND	7.125	6.015	5.665	5.535	7.71	7.935	11.57	10.65	13	12.27	15.345	ND	ND	ND	ND	4.395	6.135	4.945	6.64	4.885	ND	ND	ND	ND	ND	ND	ND	ND	7.1
241	Oxacillin	Test	15	ND	ND	7.87	7.08	6.805	ND	ND	14.79	13.45	ND	15.005	20.29	ND	ND	ND	ND	6.14	8.33	ND	9.055	6.45	ND	ND	ND	ND	ND	ND	ND	ND	7.17
242	(-)-Citreoviridin	Test	9	7.3	9.805	10.47	9.555	9.57	13.005	14.495	18.915	17.655	20.36	19.37	27.265	27.49	24.29	27.39	56.08	7.305	10.135	7.45	9.81	6.95	16.46	14.08	16.61	14.29	13.08	17.01	15.2	16.73	10.515
243	Ochratoxin A	Test	9	6.93	9.485	9.775	8.86	8.455	12.055	13.415	17.825	16.53	19.37	17.85	25.37	24.76	21.46	25.1	52.9	7.235	10.05	7.09	10.39	7.6	18.28	15.58	18.62	12.89	11.69	14.2	12.37	14.42	8.535
244	Bromfenvinfos	Test	10	7.82	10.41	11.545	10.685	10.845	14.27	16.06	20.42	19.205	21.97	21.2	29.59	30.56	27.22	30.77	59.36	8.04	11.17	9.66	11.815	9	22.5	19.21	23.03	15.04	13.82	18.47	16.59	18.36	11.605
245	Toremifene	Test	22	7.45	9.955	10.83	10.48	10.57	13.475	15.07	19.44	19.01	20.89	20.83	28.17	29.01	26.38	29.61	57.74	7.76	10.91	8.285	10.025	7.745	17.56	17.05	17.82	16.26	15.03	20.93	19.15	20.02	13.15
246	Difenoconazole	Test	10	7.94	10.605	11.95	11.04	11.175	14.58	16.66	20.985	19.735	22.505	21.685	30.56	31.36	28.08	31.89	60.24	8.21	11.51	9.83	11.83	9.15	22.51	19.31	23.22	15.2	13.96	18.8	16.98	18.86	11.985
247	Lincomycin	Calibrant	23	4.34	5.245	4.82	4.63	4.375	6.22	5.83	6.905	6.075	8.28	7.015	7.22	8.69	6.18	8.8	13.83	2.825	5.145	4.39	5.045	4.39	6.9	5.27	6.87	12.31	10.73	12.71	10.52	13.09	7.705
248	Trifloxystrobin	Test	10	7.88	10.575	12.005	11.155	11.32	14.665	16.8	21.09	19.93	22.57	21.835	30.86	31.99	28.92	32.18	60.96	8.28	11.6	10.65	12.77	10.015	25.58	22.39	25.99	15.22	14.07	18.96	17.23	18.86	12.04
249	Nicosulfuron	Test	15	6.14	8.195	7.5	6.77	6.5	9.46	9.94	13.925	12.635	15.575	14.34	18.74	17.67	14.66	17.71	40.54	5.53	7.56	5.665	7.92	5.615	12.22	10.48	12.17	8.84	7.09	8.52	7.2	8.28	4.98
250	Tris(3,5-dimethylphenyl) phosphate	Test	5	9.27	11.82	14.285	13.29	13.55	17.185	20.25	24.245	22.915	25.75	24.9	36.215	38.6	35.86	38.84	68.13	9.41	13.525	13.47	14.98	12.275	32.72	29.31	33.22	16.93	15.56	21.89	20.18	21.67	14.35
251	Cyflufenamid	Test	10	7.7	10.34	11.53	10.735	10.9	14.21	16.115	20.43	19.32	21.92	21.21	29.78	30.82	27.77	30.83	59.72	8.06	11.2	10.48	12.685	9.91	25.29	22.18	25.6	14.95	13.8	18.45	16.71	18.28	11.57
252	Perfluorooctanoic acid	Test	9	7.02	9.79	10.47	9.87	9.665	12.445	14.52	18.905	18.055	20.395	19.595	27.28	26.13	23.13	27.58	54.55	7.495	10.455	7.25	10.46	7.575	17.94	14.52	20.87	13.8	12.71	16.16	14.46	16.62	10
253	Miconazole	Calibrant	22	8.41	11.025	12.665	11.56	12.43	15.505	17.61	21.91	20.39	23.585	23.455	31.795	33.41	29.76	34.17	62.37	7.925	11.03	10.38	9.96	7.57	17.32	16.8	17.31	16.2	14.97	20.78	19.01	20.73	13.5
254	Cypermethrin (peak2)	Test	5	8.48	11.28	13.525	12.675	12.895	16.255	19.165	23.25	22.075	24.63	23.975	34.59	36.48	33.83	36.84	65.88	9.05	12.98	ND	ND	ND	ND	ND	ND	16.17	14.99	20.85	19.23	20.71	13.585
255	D-y-Tochopherol	Test	9	7.69	ND	ND	ND	ND	ND	ND	ND	ND	ND	ND	ND	29.76	26.38	30.1	58.48	ND	ND	ND	ND	ND	19.08	16.01	19.17	14.91	13.66	18.15	16.28	18.1	ND
256	Fenvalerate	Test	5	8.61	11.335	13.615	12.7315	12.975	16.38	19.305	23.35	22.18	24.735	24.085	34.81	36.91	34.22	37.1	66.34	9.08	13.03	ND	ND	ND	ND	ND	ND	16.23	15.06	20.99	19.4	20.89	13.66
257	Bifenthrin	Test	10	9.2	11.81	14.345	13.425	13.7	17.2	20.41	24.37	23.12	25.825	25.08	36.475	38.91	36.35	39.18	68.45	9.48	13.66	ND	ND	ND	ND	ND	ND	16.91	15.62	21.93	20.3	21.67	14.395
258	HT-2 Toxin	Test	9	6.68	8.955	8.745	8.09	8.115	11.075	11.815	16.125	15.155	17.755	17.105	22.395	21.83	18.42	21.97	48.91	6.46	8.725	6.39	8.5	6.19	ND	ND	ND	13.26	11.86	14.66	12.64	14.59	8.76
259	Bromopropylate	Test	5	8.24	10.995	12.825	11.96	12.185	15.5	18.025	22.24	21.055	23.725	23.09	32.705	34.12	31.03	34.26	63.27	8.715	12.34	ND	ND	ND	ND	ND	ND	15.76	14.55	19.94	18.23	20.13	12.865
260	6:2FTS	Test	9	7.02	ND	ND	ND	ND	ND	ND	ND	ND	ND	ND	ND	25.94	22.91	27.84	54.28	ND	ND	ND	ND	ND	16.12	13.34	18.86	13.78	12.66	16.08	14.37	16.62	ND
261	Bicalutamide	Test	9	6.78	9.145	9.195	8.54	8.46	11.495	12.56	16.97	16.045	18.495	17.82	23.985	23.43	20.22	23.54	51.31	6.67	9.17	7.705	10.26	7.525	17.81	15.26	17.96	13.44	12.17	15.23	13.39	15.64	9.18
262	Tris(2,3-dichloro-2-propyl)phosphate	Test	10	7.68	10.255	11.32	10.48	10.605	14.01	15.735	20.08	18.905	21.625	20.92	29.12	30.01	26.78	30.2	58.8	7.87	10.96	9.505	11.76	9.015	22.52	19.46	22.76	14.88	13.69	18.18	16.36	18	11.335
263	Ochratoxin C	Test	10	7.88	10.53	11.82	10.77	10.9	14.565	16.485	20.82	19.355	22.325	21.31	30.305	31.47	28.16	31.47	60.42	8.035	11.25	10.2	12.35	9.41	24.26	20.98	24.63	14.9	13.69	18.2	16.41	17.95	11.475
264	Tris(2-ethylhexyl) phosphate	Calibrant	5	8.07	13.335	15.86	14.765	15.105	19.66	22.505	26.425	24.95	28.2	27.17	39.52	43.12	40.61	42.69	72.91	10.4	14.92	13.22	15.52	15.12	34.15	37.85	33.69	19.47	17.32	24.7	22.54	24.02	15.985
265	Paxilline	Test	10	8.1	10.82	12.445	11.375	11.55	15.18	17.43	21.7	20.235	23.18	22.345	31.79	33.13	29.92	33.58	62.16	8.315	11.82	10.25	12.285	9.405	23.94	20.65	24.56	15.57	14.34	19.53	17.74	19.48	12.47
266	Deflazacort	Test	9	7.24	9.57	9.89	8.99	8.995	12.505	13.54	17.955	16.7	19.52	18.55	25.49	25.67	22.1	25.31	53.93	6.985	9.61	7.04	9.365	6.6	15.31	13	15.3	14.06	12.74	16.39	14.36	16.06	9.92
267	Tetracycline	Test	19	4.94	6.425	5.54	5.21	5.115	6.995	7.02	9.225	7.925	10.74	9.74	11.115	11.08	11.32	8.72	20.42	3.425	5.485	4.775	5.92	4.735	8.65	7.36	8.43	10.08	8.43	9.49	8.02	9.65	5.885
268	Doxycycline	Test	14	5.87	7.8	7.07	6.43	6.27	8.7	9.1	12.69	11.595	14.43	13.51	16.617	15.65	15.74	12.9	34.55	5.2	7.205	5.135	6.955	5.105	10.41	9.25	10.34	11.54	10.06	11.64	9.91	11.67	6.825
269	Difenacoum (peak2)	Test	5	8.07	10.97	12.905	11.94	11.465	15.4	18.23	22.4	21.085	23.76	22.085	33.145	34.28	31.51	34.77	63.48	8.915	12.82	11.12	13.69	10.82	28.43	25.15	29.02	14.67	13.54	17.92	16.2	18.27	11.375
270	PFHpS	Test	10	6.98	ND	ND	ND	ND	ND	ND	ND	ND	ND	ND	ND	26.18	23.28	27.58	54.65	ND	ND	ND	ND	ND	21.16	16.83	28.22	13.78	12.66	16.14	14.48	16.58	ND
271	Tris(2-isopropylphenyl) phosphate	Test	5	9.42	11.835	14.36	13.425	13.675	17.4	20.405	24.36	23.11	25.85	25.015	36.465	39.26	36.62	38.99	68.84	9.495	13.65	14.35	15.84	13.14	35.49	32.26	35.27	17.1	15.71	22.15	20.47	21.67	14.43
272	Dioxathion	Test	10	8.17	10.825	12.515	11.55	11.71	15.24	17.575	21.82	20.5	23.265	22.47	32.07	33.65	30.61	33.67	62.76	8.45	11.97	11.46	13.4	10.665	27.86	24.52	27.95	15.64	14.39	19.64	17.94	19.5	12.55
273	Fumagillin	Test	10	7.68	10.28	11.405	10.475	10.36	14.07	15.91	20.26	18.99	21.71	20.545	29.49	30.39	27.26	30.41	59.23	7.895	11.09	8.96	11.375	8.54	21.21	18.36	21.66	13.93	12.72	16.26	14.47	16.49	10.015
274	Oxytetracycline	Test	19	4.98	6.55	5.615	5.27	5.18	7.095	7.18	9.43	8.16	11.08	10.07	11.55	11.47	8.92	11.8	21.46	3.49	5.545	4.7	5.665	4.62	8.18	6.94	8.01	9.85	8.23	9.37	7.95	9.45	5.585
275	PFECHS	Test	10	6.94	ND	ND	ND	ND	ND	ND	ND	ND	ND	ND	ND	25.8	22.84	27.25	54.19	ND	ND	ND	ND	ND	21.07	16.76	28.11	13.72	12.59	15.96	14.32	16.45	ND
276	Perfluorononanoic acid	Test	10	7.26	10.11	11.165	10.58	10.405	13.215	15.58	19.925	19.105	21.365	20.605	29.05	28.41	25.54	29.71	57.07	7.89	11.09	7.925	11.38	8.335	20.44	16.38	24.49	14.22	13.14	17.06	15.47	17.5	10.72
277	Fusariotoxin T-2	Test	9	7.01	9.385	9.55	8.805	8.87	12.08	13.035	17.44	16.405	19.025	18.31	24.665	24.67	21.24	24.46	52.79	6.93	9.43	7.55	9.93	7.23	16.88	14.29	17.19	13.81	12.51	15.85	13.91	15.67	9.58
278	Halfenprox	Test	10	9.47	12	14.59	13.58	13.9	17.475	20.77	24.71	23.325	26.165	25.365	37.01	39.55	37.02	39.81	69.16	9.58	13.81	ND	ND	ND	ND	ND	ND	17.16	15.83	22.25	20.64	22.01	14.645
279	Chlorotetracycline	Test	8	ND	7.52	6.585	6.08	5.99	8.305	8.58	11.83	10.655	13.75	12.665	15.29	ND	ND	ND	ND	4.555	6.42	5.135	6.74	5.04	ND	ND	ND	ND	ND	ND	ND	ND	6.825
280	N-AP-FHxSA	Test	4	7.01	ND	ND	ND	ND	ND	ND	ND	ND	ND	ND	ND	25.8	23.22	26.79	54.17	ND	ND	ND	ND	ND	14.79	14.2	14.63	14.36	13.21	17.15	15.33	17.09	ND
281	Vardenafil	Test	4	6.65	8.795	8.5	7.785	8.105	10.84	11.47	15.85	14.885	17.38	17.09	22.13	21.52	18.48	21.34	48.83	5.875	8	5.525	6.98	5.01	10.44	9.6	10.17	14.32	13.04	16.99	15.06	16.75	10.445
282	Flufenoxuron	Test	5	8.29	11.06	13.15	12.305	12.52	15.775	18.62	22.73	21.57	24.075	23.51	33.76	35.36	32.72	35.9	64.63	8.805	12.65	11.6	13.43	10.79	27.87	24.75	28.52	15.84	14.73	20.29	18.73	20.26	13.175
283	Glibenclamide	Test	9	7.34	9.885	10.61	9.81	9.815	13.16	14.72	19.125	18.03	20.575	19.78	27.62	27.96	24.84	27.96	56.63	7.46	10.4	8.51	10.925	8.11	19.81	17.07	20.15	13.82	12.6	16.01	14.22	16.06	9.85
284	Tris[4-(2-methyl-2-propanyl)phenyl] phosphate	Test	5	8.1	12.48	15.185	14.185	14.5	18.3	21.63	25.505	24.145	26.99	26.175	38.335	41.36	38.95	41.18	71.11	9.96	14.35	15.21	16.465	13.935	37.38	34.57	37.14	18.01	16.43	23.22	21.56	22.75	15.27
285	Cytochalasin E	Test	9	7.28	9.71	10.19	9.135	9.295	12.855	14.045	18.465	16.97	19.985	18.985	26.425	26.93	23.54	26.37	55.47	7.095	9.74	7.93	10.34	7.41	17.98	15.34	18.14	14.23	12.95	16.81	14.9	16.42	10.225
286	N-TAmP-FHxSA	Test	4	6.93	ND	ND	ND	ND	ND	ND	ND	ND	ND	ND	ND	25.55	22.85	26.37	53.86	ND	ND	ND	ND	ND	14.97	14	14.7	13.81	12.67	16.09	14.38	16.23	ND
287	Perfluorooctanesulphonamide	Test	10	7.76	10.52	12.04	11.57	11.57	14.59	16.93	21.185	20.545	22.585	22.225	31.18	32.13	29.36	32.71	61.15	8.425	11.98	10.395	12.47	10.075	24.73	21.74	25.47	14.96	13.89	18.56	16.95	18.6	11.85
288	Perfluorooctanesulfonic acid	Test	10	7.21	10.08	11.12	10.585	10.405	13.16	15.535	19.89	19.145	21.31	20.6	29.01	28.32	25.54	29.69	57.05	7.87	11.09	8.92	12.59	9.435	23.58	18.72	23.94	14.19	13.12	17.02	15.44	17.45	10.69
289	Deltamethrin	Test	5	8.54	11.27	13.51	12.64	12.875	16.245	19.135	23.21	22.05	24.59	23.945	34.54	36.48	33.83	36.79	65.84	9.04	12.955	ND	ND	ND	ND	ND	ND	16.17	14.99	20.83	19.23	20.67	13.55
290	Verruculogen	Test	9	7.63	10.22	11.19	10.225	10.4	13.85	15.54	19.91	18.565	21.43	20.59	28.77	29.45	26.07	29.66	58.21	7.735	10.755	8.64	10.94	8.055	19.82	16.45	20.17	14.81	13.53	17.98	16.07	17.83	11.24
291	Perfluorodecanoic acid	Test	10	7.49	10.37	11.74	11.165	11.02	13.865	16.5	20.785	19.975	22.16	21.47	30.535	30.32	27.57	31.56	59.22	8.19	11.64	8.62	12.35	9.14	23.08	18.33	29.56	14.6	13.54	17.85	16.32	18.22	11.34
292	Brodifacoum (Peak1)	Test	5	8.34	11.26	13.46	12.445	12.12	15.88	19.08	23.16	21.78	24.505	23.04	34.455	35.58	32.92	36.45	64.87	9.195	13.3	11.655	14.14	11.455	29.99	26.76	30.87	15.2	14.1	19.03	17.41	19.44	12.32
293	Ceftiofur	Test	14	5.28	7.365	6.305	5.835	5.615	7.71	8.33	12.1	11.04	13.545	12.48	16.11	14.23	12.06	14.35	32.7	4.94	6.77	5.025	7.44	5.325	11.34	9.82	11.2	10.58	9.24	10.1	8.63	10.03	5.835
294	Penfluridol	Test	22	7.22	9.69	10.41	9.98	10.17	13.035	14.5	18.895	18.355	20.265	20.26	27.465	28.16	26.19	28.1	56.9	7.445	10.45	8.13	10.105	7.8	17.94	18.6	17.1	15.46	14.33	19.54	17.94	19.44	12.355
295	Indoxacarb	Test	10	7.81	10.51	11.95	11.13	11.305	14.53	16.76	21.02	19.93	22.465	21.815	30.87	31.83	28.94	32.15	60.84	8.225	11.59	10.53	12.62	9.945	25.27	22.19	25.76	15.13	13.98	18.8	17.18	18.73	11.975
296	8:2FTS	Test	10	7.49	ND	ND	ND	ND	ND	ND	ND	ND	ND	ND	ND	30.22	27.4	31.59	59.11	ND	ND	ND	ND	ND	20.46	16.59	26.25	14.6	13.54	17.85	16.28	18.29	ND
297	6:2ClPFAES	Test	10	7.35	ND	ND	ND	ND	ND	ND	ND	ND	ND	ND	ND	29.53	26.81	30.65	58.36	ND	ND	ND	ND	ND	25.62	20.34	20.89	14.39	13.34	17.51	16	17.82	ND
298	Chlorfluazuron	Calibrant	5	8.46	11.21	13.44	12.59	12.835	16.105	19.045	23.12	21.96	24.475	23.935	34.415	36.24	33.55	36.75	65.57	8.975	12.9	11.96	13.725	11.105	28.8	25.68	29.49	16.07	14.94	20.69	19.14	20.61	13.47
299	Rugulosin	Test	9	7.43	10.03	10.86	9.895	9.85	13.34	15.055	19.445	18.13	20.945	19.96	28.085	28.2	24.97	28.8	56.85	7.49	10.49	8.515	10.87	7.975	19.62	16.79	20.1	12.97	11.76	14.19	12.4	14.06	8.725
300	Tetrabromobisphenol A	Test	10	8.08	10.755	12.305	11.52	11.655	15.025	17.21	21.495	20.4	23.005	22.4	31.45	32.63	29.36	33.33	61.64	8.435	11.93	10.445	12.59	9.745	24.73	21.47	25.42	15.34	14.11	19.04	17.19	19.1	12.13
301	PFNS	Test	10	7.43	ND	ND	ND	ND	ND	ND	ND	ND	ND	ND	ND	30.18	27.49	31.48	59.09	ND	ND	ND	ND	ND	26.12	20.69	23.45	14.53	13.52	17.79	16.28	18.19	ND
302	Aliskiren	Test	4	6.84	9.17	9.345	8.83	8.915	11.885	12.87	17.3	16.63	18.735	18.48	24.73	24.85	22.08	24.56	53.18	6.83	9.41	5.81	8.03	5.575	12.24	11.2	11.72	13.75	12.62	16.07	14.42	15.77	9.85
303	Perfluoroundecanoic acid	Test	10	7.66	10.595	12.255	11.67	11.565	14.425	17.3	21.51	20.71	22.85	22.205	31.81	31.94	29.36	33.09	60.97	8.46	12.1	9.295	13.46	9.985	25.92	20.56	26.45	14.89	13.89	18.53	17.05	18.85	11.885
304	Fumigacin	Test	10	7.7	10.37	11.655	10.87	10.77	14.31	16.325	20.635	19.58	22.03	21.07	30.2	31.25	28.26	31.16	60.2	8.075	11.4	9.56	11.81	8.995	22.5	19.6	22.77	14.07	12.87	16.61	14.88	16.66	10.295
305	N-CMAmP-6:2FOSA	Test	4	7.2	ND	ND	ND	ND	ND	ND	ND	ND	ND	ND	ND	27.05	23.95	27.99	55.49	ND	ND	ND	ND	ND	15.33	13.56	15.56	14.21	13.01	16.83	15.08	17	ND
306	N-MeFOSAA	Test	10	7.74	ND	ND	ND	ND	ND	ND	ND	ND	ND	ND	ND	32.11	29.38	32.95	61.15	ND	ND	ND	ND	ND	26.52	23.46	27.37	14.76	13.72	18.26	16.72	18.63	ND
307	2,2-Bis(chloromethyl)-1,3-propanediyl tetrakis(2-chloroethyl) bis(phosphate)	Test	9	7.14	9.655	10.215	9.525	9.57	12.725	14.155	18.575	17.61	20.025	19.41	26.78	26.98	23.95	26.96	55.49	7.305	10.08	8.23	10.68	7.97	19.2	16.6	19.45	14.07	12.93	16.68	14.97	16.49	10.24
308	N-EtFOSAA	Test	5	7.83	ND	ND	ND	ND	ND	ND	ND	ND	ND	ND	ND	33.14	30.5	33.86	62.25	ND	ND	ND	ND	ND	27.65	24.53	28.45	14.93	13.89	18.61	17.09	18.92	ND
309	Destruxin B	Test	9	7.55	9.96	10.705	9.75	9.845	13.595	14.81	19.22	17.885	20.72	19.67	27.715	29.01	25.7	27.64	57.77	7.5	10.305	7.92	10.31	7.4	17.87	15.25	17.84	14.63	13.4	17.69	15.82	16.96	10.75
310	FDSA	Test	5	8.09	ND	ND	ND	ND	ND	ND	ND	ND	ND	ND	ND	34.99	32.49	35.45	64.28	ND	ND	ND	ND	ND	28.22	25.19	29.02	15.56	14.47	19.8	18.31	19.76	ND
311	PFDS	Test	5	7.62	ND	ND	ND	ND	ND	ND	ND	ND	ND	ND	ND	31.77	29.2	32.98	60.8	ND	ND	ND	ND	ND	28.82	22.77	35.32	14.82	13.81	18.46	17.02	18.79	ND
312	Novobiocin	Test	10	7.61	10.35	11.695	10.625	10.015	14.155	16.46	20.74	19.265	22.095	20.09	30.44	31.01	28.3	31.41	59.95	8.225	11.75	9	11.645	8.63	21.97	19.18	22.37	12.66	11.54	13.87	12.27	13.73	8.29
313	Perfluorododecanoic acid	Test	10	7.83	10.795	12.695	12.105	12.03	14.895	17.99	22.13	21.31	23.42	22.825	32.88	33.34	30.81	34.41	62.51	8.675	12.49	9.96	15.08	10.86	29.15	22.77	26.86	15.16	14.15	19.1	17.69	19.39	12.35
314	Tetrandrine	Test	8	5.01	6.985	5.875	5.525	5.52	7.315	7.73	11.665	11.08	12.9	12.495	15.79	14.19	12.82	13.81	35	4.335	5.92	5.02	6.62	4.83	9.74	9.14	10.5	14.91	13.6	18.17	16.15	17.42	10.875
315	Rafoxanide	Test	5	8.86	11.725	14.235	13.17	12.705	16.875	20.25	24.2	22.77	25.635	23.775	36.245	38.05	35.54	38.72	67.55	9.62	14	13.3	15.46	12.875	34.31	31.25	35.12	15.43	14.32	19.48	17.89	19.74	12.61
316	Dabigatran etexilate	Test	4	6.95	9.315	9.61	9.135	9.435	12.115	13.26	17.695	17.105	19.105	19.125	25.415	25.53	22.71	25.4	53.99	6.925	9.55	6.9	8.575	6.105	13.48	12.44	13.51	14.61	13.42	17.69	15.97	17.62	11.07
317	10:2FTS	Test	9	7.83	ND	ND	ND	ND	ND	ND	ND	ND	ND	ND	ND	33.37	30.81	34.52	62.51	ND	ND	ND	ND	ND	25.55	20.41	21.72	15.21	14.19	19.17	17.7	19.46	ND
318	8:2ClPFAES	Test	5	7.69	ND	ND	ND	ND	ND	ND	ND	ND	ND	ND	ND	32.65	30.14	33.61	61.76	ND	ND	ND	ND	ND	31.44	24.32	32.79	15.01	13.99	18.79	17.38	19.03	ND
319	Acarbose	Calibrant	2	1.36	0.92	1.38	1.38	1.3	1.435	1.38	0.92	0.93	1.38	1.31	0.925	1.38	0.8	1.79	1.39	0.88	1.46	1.38	0.67	1.46	1.25	0.77	1.58	5.08	3.79	5.77	4.67	5.47	3.735
320	Perfluorotridecanoic acid	Test	5	7.96	10.955	13.085	12.475	12.435	15.295	18.595	22.655	21.835	23.915	23.34	33.825	34.57	32.17	35.55	63.83	8.86	12.83	10.61	16.7	11.78	33.42	25.19	33.65	15.41	14.4	19.63	18.24	19.84	12.77
321	Tralomethrin (peak3)	Test	10	8.85	11.53	13.96	13.045	13.305	16.765	19.83	23.83	22.61	25.235	24.515	35.61	37.86	35.35	38.02	67.31	9.255	13.32	ND	10.675	ND	ND	ND	ND	16.49	15.32	21.41	19.86	21.19	14.01
322	Icariin	Test	4	6.54	8.91	8.79	8.075	8.005	10.985	12.04	16.525	15.505	17.9	17.175	23.455	22.53	19.55	22.54	50.5	6.365	8.73	5.385	7.74	5.28	11.66	10.4	11.4	13.07	11.89	14.65	12.93	14.45	8.82
323	Tris(2,3-dibromopropyl) phosphate	Test	10	7.88	10.48	11.805	10.91	11.105	14.525	16.49	20.8	19.575	22.3	21.585	30.345	31.5	28.36	31.68	60.44	8.12	11.37	9.96	12.155	9.375	23.71	20.62	24.06	15.15	13.96	18.78	17.02	18.68	11.835
324	PFDoS	Test	5	7.94	ND	ND	ND	ND	ND	ND	ND	ND	ND	ND	ND	34.39	31.98	35.4	63.62	ND	ND	ND	ND	ND	35.59	26.78	36.69	15.34	14.38	19.52	18.15	19.76	ND
325	Perfluorotetradecanoic acid	Test	5	8.09	11.105	13.42	12.795	12.795	15.66	19.12	23.12	22.28	24.345	23.79	34.625	35.64	33.33	36.53	64.96	9.03	13.12	11.235	17.89	12.725	37.83	27.53	38.24	15.63	14.6	20.06	18.7	20.22	13.13
326	Ritonavir	Test	9	7.76	10.315	11.535	10.665	10.835	14.315	16.17	20.475	19.285	21.885	21.07	29.97	31.36	28.46	30.71	60.34	7.97	11.15	8.725	11.03	8.18	20.14	17.5	20.22	14.99	13.86	18.57	16.9	18.15	11.595
327	Spinosyn A	Test	22	7.94	10.405	11.65	11.02	11.495	14.565	16.27	20.59	19.765	22.045	21.98	30.07	31.73	28.96	31.68	60.7	8.05	11.37	8.635	10.09	7.66	17.69	17.2	17.24	17.34	15.81	22.32	20.45	21.71	14.315
328	Erythromycin	Test	4	6.54	8.695	8.425	7.955	7.96	10.86	11.42	15.78	15.19	17.29	16.995	22.095	21.93	19.32	21.59	49.67	6.335	8.54	5.495	7.68	5.35	11.56	10.63	11.16	13.62	12.43	15.72	13.93	15.03	9.245
329	Clarithromycin	Test	4	6.95	9.285	9.51	8.885	8.995	12.115	13.07	17.49	16.665	18.97	18.535	24.925	25.29	22.69	24.98	53.65	6.9	9.45	6.35	8.485	5.935	13.23	12.4	12.7	14.32	13.17	17.23	15.49	16.48	10.32
330	Azithromycin	Test	8	5.57	7.5	6.555	6.355	6.32	8.44	8.67	12.67	12.46	14.1	14.08	17.16	16.12	14.14	15.82	38.91	5.13	6.89	4.935	6.51	4.83	9.57	8.77	9.67	13.46	12.34	15.71	13.9	14.57	8.88
331	Narasin	Test	5	8.96	ND	15.08	ND	14.12	18.92	21.43	ND	ND	26.925	25.795	ND	38.35	35.83	37.66	67.88	ND	13.95	15.645	ND	ND	31.47	27.73	31.16	15.85	14.72	20.27	18.72	19.93	15.28
332	PFHxDA	Test	5	8.36	ND	ND	ND	ND	ND	ND	ND	ND	ND	ND	ND	37.38	35.22	38.06	66.88	ND	ND	ND	ND	ND	29.4	33.44	30.56	16	14.98	20.81	19.48	20.84	ND
333	Glycyrrhizic acid	Test	9	7.02	9.755	10.465	9.98	9.275	12.615	14.59	19.01	18.07	20.34	19.03	27.585	27	24.22	27.64	55.63	7.555	10.68	5.9	8.985	6.18	14.19	12.59	14.09	12.75	11.62	13.98	12.4	13.86	8.38
334	Roxithromycin	Test	4	7.02	9.32	9.595	9.075	9.155	12.26	13.19	17.62	16.975	19.085	18.78	25.19	25.81	23.31	25.36	54.29	7.005	9.62	6.385	8.57	6.015	13.38	12.59	12.83	14.47	13.35	17.58	15.91	16.75	10.54
335	Spiramycin	Test	8	5.29	7.23	6.185	5.975	5.99	7.9	8.295	12.11	11.835	13.61	13.455	16.43	ND	13.51	ND	37.5	4.84	6.475	4.87	6.465	4.765	9.42	8.65	9.19	14.56	13.35	ND	15.84	ND	10.205
336	Tilmicosin	Test	4	5.79	7.86	7.08	6.845	6.885	9.16	9.55	13.9	13.62	15.235	15.215	19.335	18.28	16.47	17.83	45	5.57	7.42	5.15	7.085	5.025	10.55	9.98	10.5	13.57	12.54	15.87	14.36	15.29	9.32
337	PFOcDA	Test	5	8.69	ND	ND	ND	ND	ND	ND	ND	ND	ND	ND	ND	38.8	36.75	39.24	68.44	ND	ND	ND	ND	ND	ND	ND	ND	16.34	15.32	21.44	20.12	21.31	ND
338	Tylosin	Test	4	6.4	8.6	8.31	7.8	7.99	10.73	11.39	15.845	15.16	17.205	16.92	22.4	22.06	19.62	21.34	50.1	6.24	8.37	5.66	7.96	5.45	12.06	11.07	11.47	14.16	13	16.95	15.24	16.5	10.205
339	Tris(1,1,3-tribromo-2,2-dimethylpropyl) phosphate	Test	5	9.33	ND	14.34	ND	13.66	17.355	20.405	ND	ND	25.79	24.995	ND	39.32	36.79	39.07	68.91	ND	13.57	13.375	ND	12.22	32.95	29.85	33.15	17.03	15.72	22.11	20.51	21.61	14.39
340	Valinomycin	Test	5	9.64	ND	15.13	ND	14.35	19.17	21.63	ND	ND	26.84	25.965	ND	42.86	40.69	40.82	72.65	ND	14.13	ND	ND	14.44	39.38	ND	37.81	19.07	17.16	24.39	22.49	22.39	15.235
341	Vitamin B12	Test	13	4.2	ND	ND	ND	ND	ND	ND	ND	ND	ND	ND	ND	9.48	7.85	8.97	19.62	ND	ND	ND	ND	ND	7.3	6.31	6.95	8.2	6.98	7.87	6.89	7.36	ND
342	Vancomycin	Calibrant	24	3.82	4.94	4.28	4.2	4.055	5.57	5.05	6.39	5.915	7.47	6.86	7.495	7.22	5.86	6.67	12.97	2.315	4.62	4.115	4.76	4.16	6.55	5.66	6.1	7.65	6.62	7.55	6.58	7.09	4.94
343	Iodixanol	Test	24	4.06	ND	4.54	ND	4.225	5.79	5.415	ND	ND	7.96	7.245	ND	7.88	6.2	7.44	13.9	ND	4.75	ND	ND	ND	6.49	5.39	6.17	7.31	6.08	7.32	6.3	7.12	4.55

## Sheet: Table S4
Input CM: CM 03, reference-input CMs: CM 07 (r2=0.998), CM 05 (r2=0.993), CM 15 (r2=0.990), CM 18 (r2=0.981) and CM 01 (r2=0.923), respectively.
Output CMs	R2								Mean error (min)						Median error (min)						Mean error (%)						Median error error (%)
	before projection	before projection	before calibration	after calibration with CM 07	after calibration with CM 05	after calibration with CM 15	after calibration with CM 18	after calibration with CM 01	before calibration	after calibration with CM 07	after calibration with CM 05	after calibration with CM 15	after calibration with CM 18	after calibration with CM 01	before calibration	after calibration with CM 07	after calibration with CM 05	after calibration with CM 15	after calibration with CM 18	after calibration with CM 01	before calibration	after calibration with CM 07	after calibration with CM 05	after calibration with CM 15	after calibration with CM 18	after calibration with CM 01	before calibration	after calibration with CM 07	after calibration with CM 05	after calibration with CM 15	after calibration with CM 18	after calibration with CM 01
	Calibrants	All molecules with known experimental RTs
CM 01	0.922571	0.947755	0.988452	0.998412	0.994037	0.990891	0.991323	-	0.111424	0.0533902	0.110418	0.0909162	0.107657	-	0.0620462	0.035294	0.0875252	0.072772	0.0823057	-	1.59264	0.807128	1.8511	1.64787	1.95991	-	0.927015	0.645579	1.43737	1.09658	1.26249	-
CM 02	0.930372	0.934991	0.997486	0.999083	0.994663	0.986206	0.991915	0.971781	0.0850549	0.052681	0.153186	0.178197	0.157491	0.397802	0.0590265	0.0290703	0.121087	0.0980311	0.120379	0.250629	1.68275	1.25907	2.45729	2.63609	2.57684	3.96336	0.638784	0.316831	1.36898	1.03719	1.32147	3.2139
CM 04	0.996622	0.997397	0.997855	0.99955	0.995549	0.993421	0.993228	0.974978	0.10752	0.053113	0.177014	0.181481	0.151607	0.520246	0.0752547	0.0415677	0.146898	0.140569	0.0924418	0.327123	1.55054	1.04084	2.76124	2.51611	2.17914	5.23517	1.01337	0.501047	1.7524	1.82706	1.09411	3.98454
CM 05	0.99299	0.995096	0.995533	0.9992	-	0.99287	0.993246	0.966302	0.17416	0.0782978	-	0.168192	0.159822	0.562323	0.138306	0.0588915	-	0.0972327	0.0990375	0.339729	2.74994	1.70432	-	3.02621	2.33669	5.72993	1.76843	0.673295	-	1.19679	1.30424	4.51954
CM 06	0.996798	0.996234	0.998166	0.999491	0.993156	0.992698	0.991228	0.971452	0.109823	0.0745485	0.311978	0.23331	0.223547	0.707811	0.068202	0.064846	0.264455	0.144794	0.135997	0.496638	1.25306	0.75868	3.59657	2.31143	2.47643	5.07075	0.63146	0.60587	2.3836	1.55736	1.28738	4.35304
CM 07	0.998128	0.998792	0.999542	-	0.995762	0.994402	0.9924	0.976603	0.0881285		0.277917	0.280652	0.28423	0.824621	0.0655495	-	0.227464	0.211634	0.197544	0.542339	1.16535	-	2.61472	2.93698	3.54237	5.34904	0.528759	-	1.88967	1.72554	1.55701	4.48417
CM 08	0.975372	0.978229	0.995205	0.999141	0.995407	0.992361	0.992586	0.983356	0.259848	0.134433	0.349199	0.319035	0.350395	0.807844	0.109741	0.0878428	0.277758	0.219342	0.245093	0.522814	3.42338	1.98978	3.58658	3.88777	3.17495	4.58128	0.729409	0.507459	1.81402	1.46293	1.69726	3.99026
CM 09	0.971767	0.973021	0.988961	0.999086	0.995798	0.992896	0.991503	0.984113	0.419561	0.135389	0.324314	0.288157	0.368548	0.769906	0.20561	0.0826586	0.235139	0.187666	0.262559	0.552237	6.01742	2.09697	3.66491	4.31806	3.62465	5.26412	1.32602	0.530357	1.74903	1.17347	1.98208	4.86412
CM 10	0.9711	0.974569	0.997426	0.999222	0.995249	0.991538	0.992576	0.981325	0.188798	0.127805	0.36124	0.344371	0.352402	0.850874	0.0824089	0.0797263	0.290471	0.240163	0.259225	0.559663	2.36341	1.54322	2.89914	3.10526	2.89048	4.25147	0.426172	0.4443	1.74842	1.48611	1.48513	3.67438
CM 11	0.966312	0.970656	0.991051	0.999021	0.994551	0.9912	0.991248	0.971024	0.413791	0.146463	0.418965	0.373648	0.365785	0.996524	0.248031	0.0927306	0.38521	0.318909	0.254593	0.718263	4.3696	1.78136	3.53994	3.83974	3.1227	5.85951	1.36218	0.515598	2.12685	1.64843	1.62775	5.46167
CM 12	0.980153	0.98169	0.992563	0.999232	0.995624	0.993712	0.992496	0.984467	0.569249	0.210039	0.543454	0.47511	0.548163	1.29519	0.299335	0.130955	0.427726	0.321235	0.388262	0.884589	5.11866	2.24457	4.6243	4.90079	3.51073	5.45401	1.4923	0.571418	1.89288	1.42828	1.82671	4.89067
CM 13	0.992041	0.99232	0.994819	0.999404	0.994136	0.994589	0.992708	0.97829	0.50133	0.205465	0.74079	0.57158	0.551682	1.61639	0.326839	0.139001	0.694643	0.483874	0.382659	0.954243	3.49541	1.57017	5.2245	3.85573	3.34861	6.39735	1.39198	0.646271	3.04685	1.94892	1.82976	5.5004
CM 14	0.982748	0.986361	0.989208	0.999354	0.994268	0.994057	0.99287	0.964817	0.716493	0.210737	0.710207	0.670134	0.562782	1.89974	0.412788	0.169687	0.636508	0.573862	0.401868	1.04008	6.97598	1.94372	5.16866	4.99824	4.10124	9.11151	2.33192	0.773723	3.76357	3.02038	2.34108	8.13738
CM 15	0.990309	0.991126	0.995022	0.999524	0.995758	-	0.99229	0.984358	0.361751	0.192124	0.555947	-	0.641642	1.47013	0.224645	0.163414	0.445871	-	0.504173	1.0345	2.48657	1.34981	3.62541	-	4.00514	6.30402	0.984721	0.812216	1.97292	-	2.25439	5.57817
CM 16	0.952462	0.934447	0.984108	0.999137	0.995932	0.992217	0.990346	0.98936	1.40579	0.408944	0.95177	0.910635	1.02648	2.00552	0.709208	0.225134	0.650001	0.528029	0.709425	1.53211	6.65033	2.53248	4.47993	5.90396	3.73002	4.35895	1.51028	0.458897	1.41346	1.01122	1.51248	4.04318
CM 17	0.960776	0.974704	0.989756	0.999147	0.995777	0.992432	0.982908	0.982102	0.167583	0.0521081	0.124971	0.144444	0.249395	0.329499	0.115136	0.0344891	0.100412	0.0984497	0.218584	0.3025	3.90477	1.28443	2.93366	3.93078	6.46652	6.16739	1.79592	0.519043	1.47675	1.37179	3.28127	5.09236
CM 18	0.981437	0.9927	0.993078	0.998618	0.99427	0.993133	-	0.98058	0.178886	0.098683	0.169818	0.21999	-	0.477335	0.113938	0.092943	0.106851	0.222421	-	0.309872	2.94163	1.51894	2.76085	2.88887	-	4.37575	1.2034	0.892517	1.19736	2.0924	-	3.73377
CM 19	0.965184	0.92412	0.958331	0.999506	0.992817	0.993202	0.99201	0.949805	0.425137	0.0502039	0.23518	0.19556	0.212292	0.612507	0.262463	0.0390991	0.15625	0.150898	0.141849	0.201985	5.63281	0.712778	3.11773	3.02056	2.89323	5.93612	4.42514	0.593127	2.59237	2.04987	2.31263	3.45582
CM 20	0.934322	0.941424	0.945303	0.998408	0.994227	0.994151	0.981007	0.974929	0.631364	0.098051	0.225377	0.171688	0.44294	0.542245	0.509257	0.0731709	0.17605	0.112437	0.409879	0.373793	6.80559	2.18866	3.06041	2.94769	5.54728	5.30474	5.43286	0.706816	1.96349	1.24322	4.92207	4.61549
CM 21	0.900055	0.91408	0.94598	0.997248	0.992879	0.99217	0.98662	0.932912	0.505178	0.101837	0.215779	0.200449	0.273807	0.680774	0.366289	0.0629359	0.142109	0.155741	0.229939	0.277219	6.95771	1.31278	3.00737	3.04236	3.83611	6.97781	6.05351	1.06798	2.23537	2.3263	3.54447	4.24347
CM 22	0.924644	0.914258	0.932431	0.993144	0.993492	0.996404	0.983946	0.962804	1.68323	0.560025	0.594836	0.354114	0.993084	1.6685	1.1793	0.563319	0.417203	0.236571	0.84964	0.916154	10.6608	4.25034	3.57794	3.05064	6.57297	8.15959	7.77516	3.82264	2.87942	1.47458	6.099	6.83443
CM 23	0.914537	0.921521	0.957083	0.996003	0.993908	0.992859	0.985448	0.928711	1.26721	0.395143	0.564246	0.45677	0.803883	2.23544	1.03843	0.359814	0.405647	0.270064	0.697639	1.20347	10.0418	4.7204	4.41539	3.97906	7.15441	13.6908	7.77939	2.93747	3.45349	2.20961	5.87169	12.2118
CM 24	0.914231	0.910015	0.930012	0.999376	0.993863	0.996662	0.965249	0.972671	1.83533	0.160894	0.591069	0.383887	1.43312	1.53007	1.26415	0.125924	0.388356	0.290036	1.17283	0.85547	11.1119	1.67841	3.46761	3.08766	9.27805	7.15482	8.682	0.723488	2.72716	1.57654	9.01021	6.66977
CM 25	0.803501	0.829323	0.863902	0.990251	0.993207	0.979565	0.990065	0.96027	0.966356	0.357535	0.217742	0.261366	0.209411	0.626239	0.758383	0.394903	0.173208	0.18011	0.171259	0.537089	10.7722	3.04159	1.95202	2.61591	1.89203	4.24567	5.32345	2.93555	1.29507	1.37155	1.37863	4.03835
CM 26	0.80947	0.831338	0.868503	0.998553	0.994019	0.983676	0.990645	0.980639	0.908209	0.122265	0.207452	0.227824	0.212778	0.473059	0.627256	0.0952845	0.162471	0.14277	0.172289	0.377292	13.4813	1.74113	2.36907	2.91223	2.32331	3.67616	4.68922	0.810768	1.47141	1.17734	1.51034	3.49987
CM 27	0.90668	0.913812	0.917013	0.999059	0.994873	0.987105	0.992507	0.975853	0.851387	0.137566	0.324027	0.306346	0.289358	0.823849	0.410373	0.102192	0.288487	0.194203	0.220826	0.866262	8.73781	1.4774	2.35626	2.91661	2.17867	5.04864	2.26626	0.708981	2.10864	1.21983	1.60527	5.47334
CM 28	0.90984	0.911942	0.912477	0.999153	0.995603	0.981516	0.986428	0.973233	0.818409	0.126217	0.286672	0.442227	0.510754	0.711918	0.314095	0.0965886	0.243646	0.37643	0.452431	0.705891	11.2275	1.70785	2.4906	4.53389	4.33859	5.92583	2.32131	0.710386	1.94607	2.60367	3.79796	5.50552
CM 29	0.910497	0.921219	0.925111	0.999127	0.995568	0.986762	0.992999	0.977016	0.87509	0.120519	0.281993	0.323871	0.266462	0.757967	0.489127	0.0845838	0.242497	0.202639	0.192356	0.735336	7.95984	1.2531	2.07653	2.98928	1.9975	5.00726	2.73716	0.570005	1.64574	1.44476	1.3161	4.61945
CM 30	0.899787	0.926754	0.924399	0.999249	0.995393	0.985543	0.992973	0.974618	0.546496	0.078469	0.195262	0.27311	0.180136	0.484696	0.192573	0.0622219	0.155497	0.24796	0.123853	0.4299	8.92843	1.26403	2.34608	3.69804	2.25648	5.14502	1.77558	0.654003	1.88404	2.4197	1.49427	5.31344
Raw data from experimental-experimental projections (input CM 03, reference-input CM 07).
Number	Compound Name	Group	CM 03	CM 01	CM 02	CM 03	CM 04	CM 05	CM 06	CM 07	CM 08	CM 09	CM 10	CM 11	CM 12	CM 13	CM 14	CM 15	CM 16	CM 17	CM 18	CM 19	CM 20	CM 21	CM 22	CM 23	CM 24	CM 25	CM 26	CM 27	CM 28	CM 29		CM 30	CM 01	CM 02	CM 03	CM 04	CM 05	CM 06	CM 07	CM 08	CM 09	CM 10	CM 11	CM 12	CM 13	CM 14	CM 15
			Experimental RT (min)	Projected RT (min)																															rpRT (min), using CM 07 as reference-input CM
1	4-Amino-1,2,4-triazole	Test	1.355	1.32166	1.03029	1.36172	1.33499	1.14836	1.30404	1.46097	1.03159	0.7684	1.59899	1.24875	0.967749	1.2253	0.6	1.75356	1.73494	0.832588	1.82589	1.4305	0.628519	1.45128	1.80097	0.934791	2.50572	2.82847	1.55728	2.84332	1.63615	3.30743		2.04721	1.31481	0.897859	1.35422	1.22698	1.37095	1.32425	1.37235	0.860533	0.657049	1.40373	1.11291	0.835714	1.20859	0.6	1.92476
2	Moniliformin	Calibrant	1.565	1.45373	1.03631	1.57142	1.39312	1.32705	1.55475	1.56495	0.961101	0.781941	1.54117	1.25872	0.871225	1.35289	0.6	2.09232	1.35604	0.860316	2.02142	1.58162	0.914747	1.63447	2.08443	0.827112	2.74915	3.12422	1.82873	3.14597	1.9013	3.5727		2.19519	1.45782	1.00747	1.57332	1.39153	1.50539	1.57421	1.58206	0.945191	0.763551	1.51592	1.24291	0.896129	1.42965	0.6	2.09065
3	3-Amino-2-oxazolidinone	Test	1.395	1.3458	1.02935	1.40166	1.34414	1.18229	1.35063	1.47894	1.01404	0.767779	1.5842	1.24686	0.944048	1.24605	0.6	1.81801	1.65213	0.836893	1.86314	1.45743	0.682699	1.48365	1.85447	0.910503	2.5515	2.88457	1.60863	2.9007	1.68632	3.35752		2.07511	1.33426	0.912534	1.38516	1.25038	1.39015	1.35897	1.40231	0.871148	0.671261	1.41809	1.13032	0.842512	1.2393	0.6	1.94747
4	1H-benzotriazole	Test	5.615	4.97969	6.56954	5.61942	5.35969	5.00957	7.18812	7.11304	9.08345	7.77456	10.8752	9.46181	10.6686	10.9416	8.38071	11.6504	20.5835	3.54873	5.7654	4.92229	6.25761	5.14524	8.74869	8.19717	8.9043	9.05767	7.57076	9.46826	7.6897	9.56291		5.6692	4.89211	6.48445	5.51164	5.30841	5.03504	6.99551	7.04903	9.06445	7.83858	10.7599	9.51404	10.7189	11.0078	8.52048	11.0346
5	Nicotinic Acid	Test	ND	ND	ND	ND	ND	ND	ND	ND	ND	ND	ND	ND	ND	ND	ND	ND	ND	ND	ND	ND	ND	ND	ND	ND	ND	ND	ND	ND	ND	ND		ND	ND	ND	ND	ND	ND	ND	ND	ND	ND	ND	ND	ND	ND	ND	ND
6	Melamine	Test	1.355	1.32166	1.03029	1.36172	1.33499	1.14836	1.30404	1.46097	1.03159	0.7684	1.59899	1.24875	0.967749	1.2253	0.6	1.75356	1.73494	0.832588	1.82589	1.4305	0.628519	1.45128	1.80097	0.934791	2.50572	2.82847	1.55728	2.84332	1.63615	3.30743		2.04721	1.3084	0.893041	1.34393	1.21919	1.36455	1.31276	1.36237	0.857104	0.652386	1.39906	1.10719	0.833584	1.19842	0.6	1.91726
7	Metformin	Test	1.38	1.33367	1.0297	1.38169	1.33945	1.16532	1.32726	1.46985	1.02258	0.767902	1.59138	1.24759	0.955588	1.23546	0.6	1.78576	1.69292	0.834683	1.84452	1.44385	0.655588	1.46731	1.82769	0.922431	2.52858	2.85651	1.58293	2.872	1.66121	3.33245		2.06114	1.31481	0.897859	1.35422	1.22698	1.37095	1.32425	1.37235	0.860533	0.657049	1.40373	1.11291	0.835714	1.20859	0.6	1.92476
8	1,3-Benzothiazol	Test	7.52	6.21089	8.19316	7.51997	6.85466	6.8548	9.50512	9.93386	13.7272	12.4259	15.464	14.5294	18.091	17.461	13.9005	17.3779	37.95	5.3398	7.49123	6.1295	8.05782	5.78436	12.5971	10.4169	12.6756	11.653	10.1933	12.5655	10.6601	12.6652		7.58958	6.16655	8.14373	7.45796	6.79951	6.81662	9.43943	9.78974	13.5157	12.2315	15.2871	14.305	17.762	17.132	13.7656	17.2418
9	Trimethyl phosphate	Test	4.52	4.05083	4.69871	4.51941	4.21583	3.97022	5.74978	5.28155	5.78827	4.99335	7.15173	6.23557	6.39983	7.36756	5.60506	7.18878	11.2085	2.51467	4.75549	4.43694	4.96555	4.50368	6.72123	5.38183	6.96625	7.45411	5.97529	7.68656	6.01684	7.81048		4.62451	3.96572	4.43011	4.42254	4.04675	3.72623	5.67459	5.02924	5.28057	4.54315	6.60761	5.72525	5.70613	6.80479	5.07765	6.89055
10	Hexamethylenetetramine	Test	1.315	1.29802	1.03215	1.32178	1.32673	1.11449	1.25803	1.44384	1.05104	0.770519	1.61546	1.25241	0.993931	1.20622	0.6	1.6894	1.82268	0.82874	1.78865	1.40452	0.57451	1.42017	1.7477	0.960785	2.46023	2.77248	1.50611	2.78606	1.58613	3.25756		2.01943	1.27077	0.864904	1.28255	1.17254	1.32616	1.24459	1.30246	0.837684	0.625193	1.37238	1.0738	0.822235	1.13806	0.6	1.87303
11	(±)-Methamidophos	Calibrant	2.875	2.51282	1.84797	2.88008	2.30187	2.47177	3.36701	2.76039	1.84149	1.80035	2.53797	2.44439	1.84281	3.14443	2.19293	3.62357	2.28886	1.32092	3.23904	2.81989	2.75424	3.17342	3.99464	1.47531	4.44	5.0229	3.61167	5.1039	3.64667	5.34821		3.19762	2.5431	1.99745	2.916	2.41313	2.32681	3.30935	2.86058	1.96782	1.75354	2.76892	2.43179	1.89423	3.06807	1.87866	3.43894
12	Patulin	Test	4.125	3.69113	3.93049	4.12948	3.75065	3.60794	5.20373	4.62674	4.65965	4.09076	5.82493	5.16856	5.05598	6.21126	4.71019	5.7565	8.41426	2.18155	4.3959	4.1231	4.46483	4.27163	6.04001	4.27056	6.32527	6.87677	5.40726	7.06241	5.43775	7.20557		4.26976	3.63221	3.62111	4.0654	3.55484	3.28041	5.09714	4.33953	4.07178	3.53482	5.22933	4.54243	4.25435	5.50677	4.00052	5.65485
13	L-carnitime	Test	ND	ND	ND	ND	ND	ND	ND	ND	ND	ND	ND	ND	ND	ND	ND	ND	ND	ND	ND	ND	ND	ND	ND	ND	ND	ND	ND	ND	ND	ND		ND	ND	ND	ND	ND	ND	ND	ND	ND	ND	ND	ND	ND	ND	ND	ND
14	Recinine	Test	4.55	4.07799	4.75716	4.5494	4.25072	3.99823	5.79098	5.33233	5.87752	5.06536	7.25606	6.32037	6.50814	7.45951	5.67592	7.31106	11.4376	2.54125	4.78312	4.45773	5.00322	4.52087	6.77446	5.46773	7.01658	7.4984	6.01902	7.73478	6.06173	7.85742		4.65217	4.04196	4.63731	4.50714	4.16984	3.84264	5.80188	5.20919	5.61018	4.82002	6.97932	6.04837	6.11357	7.15729	5.36734	7.2308
15	Pyridoxine	Test	ND	ND	ND	ND	ND	ND	ND	ND	ND	ND	ND	ND	ND	ND	ND	ND	ND	ND	ND	ND	ND	ND	ND	ND	ND	ND	ND	ND	ND	ND		ND	ND	ND	ND	ND	ND	ND	ND	ND	ND	ND	ND	ND	ND	ND	ND
16	Pencillic acid	Test	5.495	4.88581	6.40181	5.4994	5.24964	4.89502	7.03764	6.9195	8.73315	7.46334	10.4959	9.10661	10.1835	10.5363	8.06102	11.228	19.4868	3.43197	5.65557	4.8865	6.12592	5.07472	8.52008	7.94273	8.68376	8.88529	7.39813	9.27282	7.50483	9.36912		5.55237	4.82117	6.37456	5.42496	5.23419	4.95067	6.90074	6.91902	8.82459	7.61979	10.5046	9.26685	10.3772	10.7243	8.28688	10.7505
17	Metronidazole	Test	4.585	4.11406	4.83478	4.5894	4.29697	4.03561	5.84573	5.40006	5.9969	5.16187	7.39541	6.43394	6.65353	7.58272	5.77085	7.47601	11.7459	2.57689	4.81995	4.48467	5.05324	4.54375	6.84562	5.58206	7.0839	7.55741	6.07731	7.7991	6.12165	7.9201		4.68911	4.02942	4.60297	4.49313	4.14948	3.82324	5.78119	5.1792	5.55494	4.77353	6.91715	5.99417	6.04493	7.09817	5.31881	7.17361
18	Triethyl phosphate	Calibrant	6.89	5.85352	7.7969	6.88974	6.37228	6.23704	8.73689	9.03412	12.3874	10.9801	14.2052	13.0079	15.7506	15.3089	11.9844	15.2742	32.4058	4.77341	6.92194	5.6836	7.51465	5.69323	11.2749	9.91522	11.3689	10.825	9.35269	11.5411	9.66949	11.6345		6.94042	5.88777	7.75535	6.91038	6.35889	6.28942	8.68906	8.97945	12.3351	11.0049	14.1222	13.0035	15.7639	15.3115	12.1568	15.3877
19	Acephate	Calibrant	3.88	3.45559	3.4461	3.87956	3.44632	3.37757	4.84434	4.21734	3.98041	3.55097	5.02377	4.52751	4.2669	5.51297	4.163	5.03893	6.8214	1.98191	4.16503	3.88504	4.13393	4.10562	5.61396	3.58785	5.92742	6.50561	5.04414	6.66516	5.07118	6.82352		4.04715	3.39796	3.16653	3.82129	3.26378	3.02876	4.69505	3.94974	3.44113	3.00924	4.50074	3.9224	3.52314	4.81479	3.41584	5.00949
20	Sulfamylon	Test	1.375	1.33367	1.0297	1.38169	1.33945	1.16532	1.32726	1.46985	1.02258	0.767902	1.59138	1.24759	0.955588	1.23546	0.6	1.78576	1.69292	0.834683	1.84452	1.44385	0.655588	1.46731	1.82769	0.922431	2.52858	2.85651	1.58293	2.872	1.66121	3.33245		2.06114	1.32126	0.902714	1.36452	1.23477	1.37735	1.33579	1.38234	0.864016	0.661749	1.40845	1.11867	0.837912	1.21879	0.6	1.93229
21	Molinate	Test	10.415	7.34479	9.9096	10.421	9.57152	9.74464	13.0297	14.2822	18.6262	17.4838	20.3537	19.5802	26.5997	26.7639	23.3629	26.9628	55.6875	7.3225	10.0652	8.68556	10.3276	8.03215	19.1997	16.0397	19.3068	14.8808	13.4725	17.1128	15.1444	17.2161		10.6299	7.28135	9.85616	10.3096	9.45135	9.64989	12.8215	14.1415	18.5084	17.3576	20.1908	19.4823	26.3913	26.4905	22.9347	26.8192
22	Atrazine-desethyl	Test	6.505	5.61451	7.5152	6.50962	6.08709	5.86707	8.27712	8.48072	11.4853	10.0518	13.3384	12.004	14.2636	13.9981	10.8668	14.2062	28.8972	4.41431	6.57707	5.36172	7.16345	5.58321	10.499	9.56059	10.607	10.3086	8.83	10.921	9.07368	11.0123		6.55409	5.61182	7.41193	6.46323	6.02648	5.88614	8.10714	8.35926	11.3525	10.0162	13.1349	11.933	14.1702	13.9171	10.9563	13.9712
23	Isoprocarb	Test	8.72	6.76799	8.92524	8.72046	7.90114	8.04367	10.996	11.6774	15.8997	14.8054	17.5759	16.9276	22.0193	21.4292	17.7239	21.7367	46.9714	6.28424	8.56626	6.21187	9.00363	6.13547	15.2326	12.0183	15.3055	13.1157	11.6822	14.4907	12.5419	14.6031		8.84553	6.76805	8.93465	8.69998	7.90277	8.05417	11.0392	11.6905	15.9009	14.7589	17.6136	16.893	21.9541	21.3296	17.6856	21.5272
24	Bisphenol F	Test	ND	ND	ND	ND	ND	ND	ND	ND	ND	ND	ND	ND	ND	ND	ND	ND	ND	ND	ND	ND	ND	ND	ND	ND	ND	ND	ND	ND	ND	ND		ND	ND	ND	ND	ND	ND	ND	ND	ND	ND	ND	ND	ND	ND	ND	ND
25	3-Amino-5-morpholinomethyl-2-oxazolidinone	Test	1.345	1.31571	1.03067	1.35173	1.33284	1.13989	1.29249	1.45661	1.03628	0.76879	1.60295	1.2495	0.974062	1.22037	0.6	1.73749	1.75642	0.831583	1.81658	1.42391	0.615	1.44339	1.78763	0.941131	2.49432	2.81446	1.54447	2.82899	1.62363	3.29495		2.04025	1.30204	0.88826	1.33366	1.2114	1.35815	1.3013	1.35238	0.85373	0.64776	1.39446	1.10152	0.831522	1.18828	0.6	1.90979
26	Thiabendazole	Calibrant	6.915	5.87161	7.81724	6.91975	6.39474	6.26634	8.77325	9.0773	12.4555	11.0518	14.2696	13.0845	15.8659	15.4121	12.0739	15.3644	32.6787	4.80128	6.94912	5.70999	7.54156	5.69976	11.3368	9.93994	11.4299	10.8653	9.39349	11.59	9.71661	11.6837		6.9711	5.84343	7.69789	6.83279	6.2998	6.21785	8.58545	8.86941	12.1658	10.8323	13.9534	12.818	15.4846	15.0639	11.9418	15.1359
27	4-Octylphenol	Test	ND	ND	ND	ND	ND	ND	ND	ND	ND	ND	ND	ND	ND	ND	ND	ND	ND	ND	ND	ND	ND	ND	ND	ND	ND	ND	ND	ND	ND	ND		ND	ND	ND	ND	ND	ND	ND	ND	ND	ND	ND	ND	ND	ND	ND	ND
28	(2E)-2-(2-Nitrobenzylidene)hydrazinecarboxamide	Test	6.275	5.46074	7.3158	6.27955	5.91049	5.6442	7.99856	8.13819	10.9022	9.47371	12.7628	11.3689	13.3438	13.2038	10.2059	13.5964	26.7433	4.19259	6.36783	5.20186	6.94099	5.49136	10.0376	9.29154	10.1559	9.9905	8.50879	10.5454	8.7142	10.6362		6.32254	5.46768	7.2391	6.25562	5.876	5.7041	7.85038	8.07919	10.8864	9.55852	12.6598	11.4312	13.4378	13.2895	10.4237	13.3351
29	Propoxur	Calibrant	7.63	6.26856	8.25903	7.63001	6.94266	6.96317	9.64048	10.0907	13.9438	12.6648	15.6678	14.7758	18.4809	17.8326	14.2424	17.7818	38.8697	5.43415	7.5903	6.1676	8.14845	5.7956	12.8325	10.5136	12.9092	11.7936	10.3363	12.7437	10.8331	12.8446		7.70384	6.24635	8.25868	7.62722	6.944	6.98591	9.67254	10.0498	13.8713	12.6072	15.6347	14.6975	18.3787	17.7139	14.2907	17.8352
30	Ethirimol	Test	8.45	6.65618	8.75707	8.45035	7.6494	7.77502	10.6592	11.277	15.4401	14.3127	17.1142	16.4399	21.1968	20.5533	16.8475	20.8099	45.1488	6.08842	8.32552	6.1658	8.79682	5.98589	14.6269	11.5343	14.6985	12.8009	11.3617	14.0616	12.1203	14.1717		8.56158	6.58564	8.70562	8.3216	7.55994	7.68283	10.5842	11.1203	15.2319	14.0538	16.9599	16.1827	20.7739	20.0858	16.4912	20.2561
31	Perfluorobutanoic acid	Test	6.09	5.32837	7.12969	6.08951	5.75991	5.46073	7.76748	7.84983	10.3997	8.98916	12.2555	10.8309	12.5765	12.5487	9.66928	13.0841	24.959	4.00781	6.1947	5.09737	6.75124	5.40235	9.66114	9.02855	9.78897	9.72485	8.24103	10.2351	8.41808	10.3262		6.1327	5.2247	6.94102	5.92962	5.63711	5.41817	7.46442	7.6391	10.1272	8.82883	11.8766	10.6237	12.2776	12.3084	9.59961	12.3432
32	Sulfacetamide	Calibrant	4.025	3.59726	3.73487	4.02951	3.6291	3.51561	5.06078	4.46164	4.3829	3.8708	5.49846	4.90755	4.73292	5.92759	4.48879	5.44856	7.75731	2.10028	4.30359	4.03083	4.33333	4.20748	5.86859	3.99307	6.1649	6.72837	5.26187	6.90322	5.29067	7.05219		4.18025	3.54673	3.44526	3.97604	3.44393	3.1836	4.94929	4.1896	3.82393	3.32849	4.94378	4.29929	3.96481	5.23682	3.77354	5.40182
33	Sulfaguanidine	Calibrant	1.965	1.73915	1.13127	1.97093	1.57334	1.6712	2.07013	1.8301	0.982349	0.923347	1.58013	1.41562	0.88049	1.72194	0.72287	2.69874	1.02761	0.948489	2.39363	1.92113	1.46999	2.06109	2.64186	0.769365	3.23402	3.69523	2.35795	3.73156	2.41805	4.09349		2.48705	1.76054	1.25281	1.99016	1.70088	1.75531	2.07544	1.97155	1.16609	1.00428	1.79601	1.53424	1.08716	1.87709	0.734205	2.4409
34	Metribuzin	Test	7.8	6.35501	8.36076	7.80008	7.08166	7.13092	9.85042	10.3337	14.27	13.0257	15.9767	15.1455	19.0716	18.4039	14.7745	18.4161	40.2577	5.57701	7.74321	6.19905	8.28649	5.81529	13.1987	10.6772	13.2732	12.0085	10.5549	13.0184	11.1005	13.1214		7.88087	6.29526	8.3278	7.73069	7.03385	7.0901	9.81374	10.2099	14.0848	12.8338	15.843	14.9329	18.7516	18.0712	14.6159	18.1996
35	Cycloate	Test	12.09	8.03153	10.6463	12.0911	11.1452	11.4188	14.7737	16.8523	21.1493	19.8192	22.7085	22.0183	30.7416	31.8883	28.9091	32.374	61.1418	8.17078	11.5058	10.0181	11.8096	8.86051	23.3161	19.4617	23.4846	16.2146	14.7991	19.5037	17.5547	19.5299		12.3321	8.05981	10.6239	12.0531	11.0881	11.3464	14.8015	16.7517	21.0438	19.7296	22.6254	21.9212	30.5775	31.7178	28.5818	32.1984
36	Mequindox	Test	5.525	4.90947	6.4447	5.52941	5.27749	4.92363	7.07538	6.96809	8.82117	7.54112	10.5916	9.19553	10.3046	10.6374	8.14058	11.336	19.7599	3.46111	5.68304	4.89543	6.15906	5.09243	8.57706	8.0079	8.73869	8.92846	7.44134	9.32166	7.551	9.41752		5.58152	4.85919	6.43415	5.47134	5.27424	4.9961	6.95138	6.98902	8.95397	7.73759	10.6424	9.40003	10.5611	10.8768	8.41247	10.9033
37	Pantothenic Acid	Test	ND	ND	ND	ND	ND	ND	ND	ND	ND	ND	ND	ND	ND	ND	ND	ND	ND	ND	ND	ND	ND	ND	ND	ND	ND	ND	ND	ND	ND	ND		ND	ND	ND	ND	ND	ND	ND	ND	ND	ND	ND	ND	ND	ND	ND	ND
38	4-nonylphenol	Test	ND	ND	ND	ND	ND	ND	ND	ND	ND	ND	ND	ND	ND	ND	ND	ND	ND	ND	ND	ND	ND	ND	ND	ND	ND	ND	ND	ND	ND	ND		ND	ND	ND	ND	ND	ND	ND	ND	ND	ND	ND	ND	ND	ND	ND	ND
39	Dichlorvos	Test	7.65	6.2789	8.27099	7.65002	6.95882	6.98289	9.66513	10.1192	13.9827	12.7078	15.7045	14.82	18.5511	17.9	14.3047	17.8559	39.0352	5.45114	7.6083	6.17299	8.16482	5.79771	12.8754	10.5319	12.9518	11.8191	10.3621	12.776	10.8646	12.8772		7.72464	6.2494	8.26304	7.6337	6.9496	6.99242	9.68141	10.0598	13.8847	12.6215	15.6478	14.7124	18.4021	17.7363	14.311	17.858
40	Monocrotophos	Test	5.23	4.66751	5.98755	5.22938	4.98871	4.63828	6.69402	6.47672	7.92981	6.766	9.60864	8.30486	9.10263	9.63491	7.35628	10.1889	17.0695	3.17147	5.40813	4.80073	5.82117	4.91443	8.01227	7.31235	8.19559	8.49479	7.00801	8.83382	7.09079	8.93509		5.29192	4.64358	6.07108	5.21034	5.0363	4.73008	6.66674	6.57901	8.19	7.04865	9.82386	8.61834	9.49016	9.98943	7.68337	10.0165
41	Mepanipyrim	Test	10.655	7.42312	10.0275	10.6611	9.80419	9.98546	13.2954	14.6532	18.9968	17.8248	20.715	19.9275	27.1973	27.5015	24.1659	27.714	56.5962	7.44913	10.2743	9.04721	10.5264	8.2687	19.7792	16.5765	19.894	15.0977	13.6907	17.4692	15.5015	17.5665		10.8791	7.38657	10.0056	10.6009	9.73888	9.94274	13.1523	14.5916	18.9576	17.7808	20.6326	19.9091	27.1291	27.4075	23.91	27.7633
42	Mevinphos	Test	5.93	5.21309	6.95578	5.92947	5.62865	5.30671	7.57174	7.60285	9.96273	8.57747	11.8054	10.3701	11.9273	11.999	9.22427	12.63	23.4597	3.85157	6.04872	5.02716	6.58713	5.31966	9.3475	8.77522	9.48411	9.49925	8.01402	9.97385	8.16941	10.0657		5.9739	5.21905	6.93384	5.92229	5.63163	5.41168	7.45597	7.6291	10.1096	8.81213	11.8582	10.6051	12.2512	12.2861	9.58107	12.3208
43	Tripropyl phosphate	Test	9.46	7.03869	9.37998	9.46074	8.62232	8.78253	11.9076	12.7992	17.1126	16.0468	18.8209	18.1483	24.1174	23.7837	20.1598	24.0605	51.3215	6.77337	9.22244	6.94684	9.56839	6.84199	16.9282	13.6774	17.0109	13.9316	12.5119	15.6509	13.688	15.7654		9.6246	7.05146	9.38799	9.47403	8.6264	8.80987	11.9039	12.851	17.1776	16.0653	18.8721	18.1942	24.1659	23.8109	20.1529	24.067
44	Triisopropyl phosphate	Test	9.885	7.17807	9.62832	9.89088	9.04959	9.21314	12.4211	13.4621	17.7971	16.7088	19.5229	18.8027	25.2534	25.1263	21.5912	25.3481	53.4378	7.0293	9.60116	7.71639	9.90246	7.38782	17.9361	14.7549	18.0283	14.3725	12.9591	16.3124	14.3453	16.4242		10.0762	7.15943	9.6231	9.88475	9.0284	9.22018	12.3509	13.4813	17.8366	16.7137	19.5258	18.8386	25.2774	25.1296	21.5079	25.4201
45	Bisphenol A	Test	ND	ND	ND	ND	ND	ND	ND	ND	ND	ND	ND	ND	ND	ND	ND	ND	ND	ND	ND	ND	ND	ND	ND	ND	ND	ND	ND	ND	ND	ND		ND	ND	ND	ND	ND	ND	ND	ND	ND	ND	ND	ND	ND	ND	ND	ND
46	Dimethoate	Test	6.075	5.32127	7.1193	6.0795	5.75184	5.45109	7.75528	7.83451	10.3728	8.96351	12.228	10.8023	12.536	12.5143	9.64128	13.0565	24.8652	3.99806	6.18558	5.09254	6.7411	5.39737	9.64145	9.01359	9.76981	9.7108	8.22688	10.2187	8.40252	10.3099		6.12274	5.29789	7.03267	6.02537	5.70811	5.50264	7.57569	7.76913	10.3547	9.04551	12.1126	10.8645	12.6211	12.5974	9.84144	12.6351
47	Propazine	Test	9.71	7.12076	9.52637	9.71082	8.87076	9.03279	12.2081	13.184	17.512	16.436	19.2316	18.5323	24.7838	24.5661	20.991	24.8092	52.5863	6.9244	9.44286	7.37835	9.76168	7.15478	17.5123	14.3021	17.6002	14.191	12.7752	16.0367	14.0711	16.1501		9.88738	7.10261	9.49751	9.66413	8.811	8.99876	12.1105	13.1411	17.4834	16.3684	19.1753	18.4952	24.6843	24.4204	20.7756	24.6921
48	PF4OPeA	Test	ND	ND	ND	ND	ND	ND	ND	ND	ND	ND	ND	ND	ND	ND	ND	ND	ND	ND	ND	ND	ND	ND	ND	ND	ND	ND	ND	ND	ND	ND		ND	ND	ND	ND	ND	ND	ND	ND	ND	ND	ND	ND	ND	ND	ND	ND
49	Nalidixic acid	Test	7.8	6.35501	8.36076	7.80008	7.08166	7.13092	9.85042	10.3337	14.27	13.0257	15.9767	15.1455	19.0716	18.4039	14.7745	18.4161	40.2577	5.57701	7.74321	6.19905	8.28649	5.81529	13.1987	10.6772	13.2732	12.0085	10.5549	13.0184	11.1005	13.1214		7.88087	6.32911	8.37471	7.80169	7.09606	7.16174	9.90982	10.32	14.2295	12.9875	15.9839	15.0919	19.0051	18.3163	14.8403	18.4497
50	2-NP-AOZ	Test	6.19	5.39865	7.23026	6.18953	5.8398	5.55722	7.88925	8.00224	10.6665	9.24487	12.5262	11.1154	12.981	12.8933	9.95061	13.3562	25.8981	4.1052	6.28585	5.14928	6.8518	5.45057	9.85874	9.17189	9.98142	9.86498	8.38221	10.3984	8.57383	10.4893		6.23245	5.40297	7.16116	6.16634	5.81121	5.62611	7.74264	7.95917	10.6825	9.36063	12.4506	11.2131	13.1222	13.0212	10.1974	13.0635
51	Carbamazepine	Calibrant	8.16	6.5275	8.57843	8.16023	7.38898	7.48715	10.2975	10.8528	14.9311	13.7566	16.6128	15.8847	20.2746	19.6014	15.9156	19.7621	43.052	5.86721	8.06619	6.18602	8.57195	5.88342	13.9844	11.1005	14.0562	12.4533	11.0076	13.5978	11.6659	13.7049		8.25725	6.51355	8.61601	8.17746	7.43033	7.53952	10.4029	10.9002	14.9643	13.7696	16.6992	15.8941	20.3007	19.6018	16.034	19.7618
52	Pirimicarb	Test	8.405	6.63897	8.73227	8.41033	7.61283	7.73527	10.6093	11.2181	15.3709	14.2376	17.0454	16.3653	21.072	20.4227	16.7184	20.6684	44.868	6.05858	8.28979	6.16586	8.766	5.96846	14.5378	11.4691	14.6093	12.7535	11.3134	13.9978	12.0577	14.1075		8.51956	6.59549	8.71778	8.34134	7.57773	7.70238	10.6087	11.1503	15.2679	14.0921	16.9951	16.2214	20.8377	20.1516	16.5537	20.3234
53	Salbutamol	Test	4.12	3.68177	3.91085	4.11949	3.73852	3.5987	5.18949	4.61016	4.6317	4.06853	5.79196	5.1422	5.02325	6.18264	4.6879	5.72448	8.34741	2.17334	4.38667	4.11406	4.45173	4.26533	6.02281	4.24259	6.30916	6.86194	5.39271	7.04648	5.42302	7.1902		4.26078	3.69672	3.76226	4.13325	3.6426	3.3579	5.20934	4.45947	4.27439	3.70344	5.462	4.74087	4.4931	5.72603	4.18397	5.86145
54	Methacrifos	Test	9.355	7.00477	9.32007	9.3607	8.52323	8.6825	11.786	12.6459	16.9516	15.8873	18.6548	17.9914	23.8456	23.4691	19.8283	23.7588	50.7877	6.71109	9.13409	6.79438	9.49164	6.7242	16.6961	13.4325	16.777	13.8255	12.4042	15.4956	13.5341	15.6103		9.51938	7.0168	9.31906	9.35509	8.51236	8.69262	11.7744	12.671	16.9855	15.8729	18.6818	18.0032	23.8378	23.4304	19.7674	23.6771
55	Bentazone	Calibrant	6.305	5.4812	7.34332	6.30956	5.93383	5.67322	8.03495	8.18325	10.9798	9.54969	12.8402	11.4528	13.4644	13.3073	10.2914	13.6759	27.0248	4.22165	6.39515	5.22066	6.97045	5.50438	10.0974	9.32953	10.2143	10.0322	8.55088	10.5944	8.76103	10.6852		6.35264	5.4836	7.25821	6.27793	5.89216	5.7236	7.87755	8.1092	10.937	9.60784	12.7116	11.4855	13.5166	13.3567	10.4805	13.4031
56	Bisphenol B	Test	ND	ND	ND	ND	ND	ND	ND	ND	ND	ND	ND	ND	ND	ND	ND	ND	ND	ND	ND	ND	ND	ND	ND	ND	ND	ND	ND	ND	ND	ND		ND	ND	ND	ND	ND	ND	ND	ND	ND	ND	ND	ND	ND	ND	ND	ND
57	Ethoprophos	Test	10.68	7.42982	10.0371	10.6811	9.82346	10.0055	13.3172	14.6841	19.0275	17.853	20.7447	19.9564	27.2469	27.5629	24.2328	27.7772	56.6692	7.45955	10.2917	9.07414	10.5432	8.28626	19.8277	16.6198	19.9432	15.1154	13.7085	17.4987	15.5311	17.5954		10.8998	7.40493	10.0281	10.6467	9.78347	9.98829	13.2048	14.6616	19.0269	17.8458	20.7004	19.9749	27.2427	27.5494	24.0618	27.9095
58	Biotin	Test	ND	ND	ND	ND	ND	ND	ND	ND	ND	ND	ND	ND	ND	ND	ND	ND	ND	ND	ND	ND	ND	ND	ND	ND	ND	ND	ND	ND	ND	ND		ND	ND	ND	ND	ND	ND	ND	ND	ND	ND	ND	ND	ND	ND	ND	ND
59	Fonofos	Test	11.505	7.74796	10.4058	11.5111	10.6079	10.8381	14.1902	15.9613	20.2862	19.0108	21.9244	21.1615	29.2973	30.1076	26.9987	30.463	59.4206	7.88042	11.0093	9.76156	11.2683	8.7209	21.8653	18.2645	22.0109	15.7984	14.3898	18.6982	16.7388	18.761		11.7504	7.80012	10.3983	11.4846	10.5703	10.801	14.172	15.9118	20.2434	18.9792	21.873	21.138	29.241	30.0556	26.7707	30.4918
60	Paraoxon-methyl	Calibrant	7.125	5.99521	7.95421	7.12982	6.55282	6.47177	9.02828	9.3782	12.9193	11.5458	14.7066	13.6094	16.6627	16.1329	12.7055	16.0249	34.5671	4.99403	7.13918	5.88732	7.72684	5.7379	11.7734	10.1062	11.8604	11.1448	9.67702	11.932	10.0466	12.0276		7.18656	6.02039	7.93472	7.15857	6.55327	6.52369	9.02622	9.33957	12.8739	11.5601	14.6563	13.5963	16.6654	16.1215	12.8665	16.2122
61	2-NP-AHD	Test	6.14	5.36368	7.18072	6.13952	5.80005	5.50896	7.82841	7.92622	10.5337	9.11719	12.3918	10.9735	12.7789	12.7209	9.80964	13.221	25.4285	4.05654	6.24029	5.12249	6.80171	5.42682	9.75979	9.10163	9.88501	9.795	8.31169	10.3167	8.49593	10.4077		6.18253	5.3701	7.12127	6.12174	5.77873	5.58711	7.68941	7.89915	10.5796	9.26134	12.3448	11.1035	12.9642	12.8872	10.0847	12.928
62	Sulfapyridine	Test	4.685	4.20355	5.02686	4.68939	4.41126	4.1292	5.98171	5.56947	6.29696	5.40552	7.74463	6.72019	7.02166	7.89367	6.01037	7.89618	12.5309	2.66689	4.912	4.54811	5.1773	4.60083	7.02442	5.86632	7.25333	7.70476	6.22303	7.96011	6.27181	8.07722		4.78187	4.17376	4.99757	4.6565	4.3832	4.04971	6.01214	5.52911	6.20568	5.32373	7.64631	6.63421	6.86274	7.79656	5.89098	7.85213
63	PFPrS	Test	ND	ND	ND	ND	ND	ND	ND	ND	ND	ND	ND	ND	ND	ND	ND	ND	ND	ND	ND	ND	ND	ND	ND	ND	ND	ND	ND	ND	ND	ND		ND	ND	ND	ND	ND	ND	ND	ND	ND	ND	ND	ND	ND	ND	ND	ND
64	(-)-Citrinin	Test	8.17	6.53208	8.58454	8.17023	7.39777	7.49707	10.31	10.8673	14.949	13.7762	16.6302	15.9045	20.3071	19.6344	15.9476	19.799	43.1266	5.87503	8.07514	6.18493	8.57977	5.88611	14.0064	11.114	14.0782	12.4654	11.02	13.6138	11.6816	13.721		8.26773	6.52335	8.62828	8.19705	7.44791	7.55906	10.4278	10.9302	15.0011	13.8088	16.7351	15.9339	20.3658	19.6679	16.0962	19.8293
65	Bisphenol S	Test	ND	ND	ND	ND	ND	ND	ND	ND	ND	ND	ND	ND	ND	ND	ND	ND	ND	ND	ND	ND	ND	ND	ND	ND	ND	ND	ND	ND	ND	ND		ND	ND	ND	ND	ND	ND	ND	ND	ND	ND	ND	ND	ND	ND	ND	ND
66	Sulfadiazine	Calibrant	4.425	3.96889	4.52231	4.42942	4.11027	3.88631	5.62547	5.12941	5.5222	4.77934	6.84006	5.98325	6.07884	7.09415	5.39418	6.83043	10.5328	2.43568	4.67258	4.37158	4.8518	4.45178	6.56224	5.12374	6.81615	7.32113	5.84413	7.54209	5.88246	7.66998		4.54186	3.93088	4.33722	4.38432	3.99133	3.6745	5.61537	4.94927	5.13563	4.42175	6.4436	5.58335	5.52856	6.64987	4.95003	6.74158
67	Hexazinone	Test	7.825	6.36993	8.37875	7.83009	7.10658	7.16055	9.88755	10.3767	14.3266	13.0884	16.0305	15.2093	19.1743	18.5044	14.8689	18.5287	40.4983	5.60184	7.77017	6.20144	8.31062	5.81931	13.2637	10.7083	13.3379	12.0461	10.5931	13.0668	11.1477	13.1701		7.91216	6.32911	8.37471	7.80169	7.09606	7.16174	9.90982	10.32	14.2295	12.9875	15.9839	15.0919	19.0051	18.3163	14.8403	18.4497
68	Sulfamethoxazole	Test	5.445	4.84612	6.3289	5.4494	5.20273	4.84737	6.97456	6.83825	8.58582	7.3338	10.3349	8.95828	9.98208	10.3681	7.92898	11.0446	19.0335	3.38346	5.60978	4.87152	6.07037	5.0451	8.42535	7.83186	8.59251	8.81324	7.32606	9.19144	7.42795	9.28852		5.50388	4.84285	6.40873	5.45138	5.2571	4.97663	6.92957	6.95902	8.89858	7.6871	10.5835	9.34298	10.4822	10.8114	8.35859	10.8378
69	Fenothiocarb	Test	11.18	7.6105	10.2649	11.1811	10.2993	10.5072	13.8504	15.4544	19.7897	18.5523	21.4665	20.6801	28.482	29.096	25.9022	29.383	58.3829	7.71501	10.725	9.57811	10.973	8.61058	21.0494	17.6342	21.1825	15.5391	14.1323	18.2275	16.2639	18.3063		11.4145	7.63163	10.2569	11.145	10.2579	10.4761	13.7812	15.4117	19.7612	18.5302	21.4126	20.674	28.4461	29.0588	25.6881	29.4651
70	Sulfathiazole	Test	4.575	4.10505	4.81541	4.5794	4.28544	4.02626	5.83206	5.38313	5.96701	5.13769	7.36055	6.4055	6.61708	7.55185	5.74707	7.43458	11.6685	2.56796	4.81075	4.47802	5.04076	4.53804	6.82781	5.55351	7.06704	7.54266	6.06274	7.78302	6.10666	7.90442		4.67987	4.07929	4.73979	4.54906	4.23056	3.90087	5.86282	5.29916	5.77658	4.96028	7.16629	6.21176	6.3212	7.3355	5.51351	7.40348
71	Formothion	Test	7.21	6.0409	8.00442	7.20985	6.61367	6.55019	9.12572	9.49235	13.0905	11.7304	14.8671	13.8039	16.9613	16.4065	12.9484	16.29	35.2752	5.06631	7.2115	5.94858	7.79606	5.74939	11.941	10.1681	12.0259	11.2502	9.78404	12.0622	10.1724	12.1585		7.26895	6.05768	7.9872	7.23274	6.61307	6.59528	9.12824	9.44961	13.0339	11.7266	14.8141	13.7729	16.9367	16.3688	13.085	16.4641
72	Thiobencarb	Test	11.835	7.90279	10.5427	11.8411	10.914	11.1687	14.5234	16.468	20.7786	19.47	22.3724	21.6474	30.1169	31.1202	28.0888	31.5504	60.4107	8.0453	11.2923	9.89687	11.5729	8.79429	22.6882	18.9168	22.8468	16.0414	14.6295	19.16	17.2061	19.2034		12.0829	7.96215	10.5335	11.8248	10.8794	11.1258	14.5538	16.4118	20.721	19.4258	22.3235	21.6033	30.0356	31.0465	27.8502	31.5105
73	Alternariol	Test	9.36	7.00477	9.32007	9.3607	8.52323	8.6825	11.786	12.6459	16.9516	15.8873	18.6548	17.9914	23.8456	23.4691	19.8283	23.7588	50.7877	6.71109	9.13409	6.79438	9.49164	6.7242	16.6961	13.4325	16.777	13.8255	12.4042	15.4956	13.5341	15.6103		9.51938	7.01479	9.31521	9.34846	8.50604	8.6861	11.7671	12.661	16.9748	15.8621	18.6712	17.9924	23.8195	23.4092	19.746	23.6554
74	Metobromuron	Test	8.76	6.78391	8.9502	8.76047	7.9391	8.08352	11.0458	11.7371	15.9668	14.8764	17.644	16.9977	22.1383	21.5582	17.8544	21.8697	47.2307	6.31244	8.60187	6.22736	9.03414	6.16263	15.3229	12.0965	15.3961	13.1615	11.7289	14.554	12.6043	14.6667		8.88763	6.77109	8.93863	8.70667	7.90888	8.06069	11.047	11.7005	15.9123	14.7709	17.6248	16.905	21.9742	21.3513	17.7067	21.5493
75	Bromacil	Test	7.795	6.35501	8.36076	7.80008	7.08166	7.13092	9.85042	10.3337	14.27	13.0257	15.9767	15.1455	19.0716	18.4039	14.7745	18.4161	40.2577	5.57701	7.74321	6.19905	8.28649	5.81529	13.1987	10.6772	13.2732	12.0085	10.5549	13.0184	11.1005	13.1214		7.88087	6.29833	8.33208	7.73714	7.03949	7.09661	9.82251	10.2199	14.0981	12.8478	15.8559	14.9474	18.7748	18.0935	14.6363	18.2223
76	Oxolinic acid	Test	6.835	5.82311	7.76249	6.83972	6.33488	6.18824	8.67632	8.96201	12.273	10.8602	14.0966	12.8793	15.5577	15.1368	11.8356	15.1261	31.9494	4.72679	6.87662	5.63947	7.46954	5.68168	11.1718	9.87323	11.2675	10.7577	9.28453	11.4596	9.59099	11.5526		6.88933	5.87985	7.745	6.89633	6.34814	6.2764	8.67023	8.95944	12.3045	10.9736	14.0917	12.97	15.7132	15.2664	12.1177	15.3419
77	Flumequine	Test	8.1	6.49974	8.54184	8.1002	7.33651	7.42769	10.2228	10.7658	14.8234	13.6379	16.508	15.7655	20.0786	19.4031	15.7242	19.5399	42.6006	5.82004	8.01244	6.19238	8.52493	5.86836	13.8525	11.0216	13.9246	12.3801	10.9332	13.5015	11.5718	13.6079		8.1944	6.48102	8.57499	8.11229	7.37193	7.47438	10.3195	10.8002	14.8407	13.6382	16.5789	15.7601	20.0822	19.3811	15.827	19.5364
78	Cinoxacin	Test	6.43	5.56182	7.44876	6.42959	6.02622	5.78945	8.18032	8.36233	11.2856	9.85192	13.1429	11.7852	13.9451	13.7217	10.6355	13.9933	28.1495	4.33749	6.50434	5.30212	7.08695	5.55338	10.3378	9.47259	10.4492	10.1984	8.71866	10.7904	8.94853	10.8814		6.47334	5.5969	7.39399	6.44109	6.01039	5.86663	8.07933	8.32926	11.3033	9.9675	13.0849	11.8797	14.0921	13.8498	10.899	13.9029
79	Carbadox	Test	5.75	5.07918	6.73969	5.74944	5.47505	5.13397	7.34981	7.32026	9.45703	8.11174	11.2744	9.84469	11.196	11.3835	8.7314	12.0799	21.7833	3.67562	5.88429	4.96284	6.39766	5.22013	8.99837	8.45366	9.14569	9.24354	7.75715	9.68018	7.89051	9.7734		5.79648	5.09416	6.77111	5.76274	5.51038	5.26878	7.27424	7.40907	9.71846	8.4438	11.4498	10.1941	11.6693	11.7989	9.1753	11.8297
80	Perfluoropentanoic acid	Test	7.575	6.24252	8.22911	7.57999	6.90248	6.9139	9.5789	10.0194	13.8459	12.5567	15.5756	14.6645	18.3044	17.6638	14.0867	17.5973	38.4537	5.39144	7.54528	6.15207	8.10739	5.79043	12.7254	10.4689	12.8028	11.7299	10.2714	12.6627	10.7545	12.7631		7.65188	6.22803	8.23247	7.58832	6.9105	6.94684	9.61914	9.98982	13.7901	12.5213	15.5555	14.608	18.2375	17.5798	14.1692	17.6984
81	Sulfamerazine	Calibrant	4.805	4.30956	5.25274	4.80938	4.54562	4.24181	6.14315	5.77258	6.65925	5.70195	8.16396	7.06754	7.47157	8.27204	6.30188	8.41013	13.498	2.77651	5.02239	4.61691	5.32423	4.66945	7.24071	6.20293	7.45875	7.8812	6.39782	8.15368	6.45266	8.26654		4.8939	4.24807	5.19453	4.74228	4.50016	4.16625	6.12441	5.70908	6.54443	5.61267	8.02303	6.96903	7.29662	8.16275	6.19029	8.21026
82	Aclonifen	Test	ND	ND	ND	ND	ND	ND	ND	ND	ND	ND	ND	ND	ND	ND	ND	ND	ND	ND	ND	ND	ND	ND	ND	ND	ND	ND	ND	ND	ND	ND		ND	ND	ND	ND	ND	ND	ND	ND	ND	ND	ND	ND	ND	ND	ND	ND
83	Dienestrol	Test	ND	ND	ND	ND	ND	ND	ND	ND	ND	ND	ND	ND	ND	ND	ND	ND	ND	ND	ND	ND	ND	ND	ND	ND	ND	ND	ND	ND	ND	ND		ND	ND	ND	ND	ND	ND	ND	ND	ND	ND	ND	ND	ND	ND	ND	ND
84	Tributyl phosphate	Test	11.92	7.94296	10.5758	11.9211	10.988	11.2488	14.6036	16.5909	20.8974	19.5815	22.4801	21.7658	30.3164	31.3659	28.3518	31.8142	60.6459	8.08537	11.3607	9.9317	11.6481	8.81289	22.8887	19.0849	23.0505	16.0979	14.6849	19.2705	17.3182	19.3087		12.1629	8.02399	10.5894	11.9663	11.0084	11.2621	14.7082	16.6217	20.9206	19.6134	22.5103	21.7995	30.3701	31.4613	28.3024	31.9359
85	Triisobutyl phosphate	Test	12.06	8.0156	10.6338	12.0611	11.1174	11.3888	14.7437	16.8062	21.1049	19.7772	22.6682	21.9737	30.6664	31.7961	28.8109	32.2753	61.0546	8.15567	11.4802	10.0013	11.7809	8.85105	23.2405	19.393	23.4079	16.1943	14.7793	19.4627	17.5131	19.4911		12.3023	8.07828	10.6425	12.0996	11.1309	11.3919	14.851	16.8217	21.1101	19.7921	22.6872	21.9868	30.6894	31.8558	28.7321	32.3396
86	Sulfisoxazole	Test	5.555	4.933	6.48696	5.55941	5.30511	4.95226	7.11304	7.01654	8.90891	7.61892	10.6868	9.28438	10.4258	10.7386	8.22038	11.4424	20.0337	3.49029	5.7105	4.90435	6.19206	5.1101	8.63416	8.07203	8.79376	8.97158	7.48451	9.37052	7.59721	9.46595		5.61071	4.95315	6.57477	5.58676	5.37064	5.10645	7.07814	7.15904	9.26597	8.02368	10.9734	9.72263	11.0088	11.2486	8.71933	11.2763
87	Diethylstilbestrol	Test	ND	ND	ND	ND	ND	ND	ND	ND	ND	ND	ND	ND	ND	ND	ND	ND	ND	ND	ND	ND	ND	ND	ND	ND	ND	ND	ND	ND	ND	ND		ND	ND	ND	ND	ND	ND	ND	ND	ND	ND	ND	ND	ND	ND	ND	ND
88	Mephosfolan	Test	7.455	6.17886	8.15709	7.45995	6.80726	6.79575	9.43145	9.84841	13.6071	12.2938	15.3512	14.3925	17.8759	17.2577	13.7149	17.1608	37.4415	5.28772	7.43715	6.10266	8.00791	5.77827	12.4693	10.3666	12.5489	11.5758	10.1148	12.4682	10.5657	12.5672		7.52736	6.1851	8.17058	7.4972	6.8327	6.85568	9.49362	9.84977	13.5987	12.319	15.3684	14.3967	17.9055	17.2664	13.8864	17.3789
89	Acetochlor	Test	10.785	7.46728	10.089	10.7911	9.9291	10.1159	13.4367	14.8538	19.1963	18.0078	20.9068	20.1154	27.5193	27.9005	24.6006	28.1264	57.0642	7.51652	10.3873	9.2129	10.636	8.37653	20.0949	16.8535	20.2141	15.2118	13.8052	17.6606	15.6936	17.754		11.0136	7.44325	10.0725	10.7385	9.87251	10.0794	13.3104	14.8016	19.1651	17.975	20.8354	20.1061	27.4691	27.8326	24.3654	28.2013
90	Sulfamethizol	Calibrant	5.085	4.55059	5.75376	5.08938	4.84597	4.50572	6.51276	6.24368	7.50755	6.40762	9.13359	7.88989	8.55067	9.17464	6.99903	9.6099	15.85	3.03814	5.27966	4.74821	5.65858	4.83184	7.75258	6.95744	7.94691	8.29102	6.80497	8.60669	6.87723	8.71128		5.15826	4.52154	5.83333	5.06441	4.8869	4.56797	6.50554	6.32901	7.71851	6.63104	9.313	8.14135	8.84645	9.45589	7.24664	9.48592
91	Hexestrol	Test	ND	ND	ND	ND	ND	ND	ND	ND	ND	ND	ND	ND	ND	ND	ND	ND	ND	ND	ND	ND	ND	ND	ND	ND	ND	ND	ND	ND	ND	ND		ND	ND	ND	ND	ND	ND	ND	ND	ND	ND	ND	ND	ND	ND	ND	ND
92	Paraoxon	Test	8.655	6.74379	8.88779	8.66043	7.8445	7.98392	10.9212	11.5879	15.7985	14.6979	17.4737	16.8215	21.8394	21.2354	17.5285	21.5351	46.5773	6.24156	8.51282	6.19328	8.95781	6.09721	15.0974	11.9042	15.1699	13.0465	11.6117	14.3956	12.4484	14.5075		8.78239	6.75273	8.91471	8.66656	7.87231	8.0216	11.0001	11.6405	15.8435	14.6989	17.5573	16.8328	21.8532	21.2212	17.5803	21.4163
93	Nifuroxazide	Test	6.88	5.84746	7.79007	6.87973	6.3648	6.22728	8.72477	9.01971	12.3646	10.9562	14.1836	12.9822	15.7121	15.2745	11.9546	15.2444	32.3147	4.76411	6.91287	5.67478	7.50565	5.69099	11.2543	9.9069	11.3486	10.8116	9.33907	11.5248	9.65379	11.6181		6.93019	5.915	7.79123	6.95932	6.39655	6.33496	8.75491	9.04947	12.4416	11.114	14.2282	13.1206	15.9407	15.469	12.2941	15.548
94	Sudan II	Test	15.04	8.86648	12.554	15.0389	13.9715	14.331	18.2861	21.3893	25.3562	23.8485	26.9825	26.1151	37.8915	40.7873	37.9576	40.9311	70.1766	9.76203	13.9592	13.7024	14.7848	13.7095	30.9404	33.1459	31.2063	17.5543	16.023	23.096	21.242	22.7352		15.0395	9.15398	12.4072	14.9274	13.8299	14.1948	18.0526	21.1586	25.1741	23.6952	26.7319	25.9529	37.6199	40.3823	37.6831	40.5439
95	Phorate sulfoxide	Test	8.535	6.69429	8.81301	8.54038	7.73239	7.8645	10.7716	11.4099	15.5946	14.4795	17.2685	16.6054	21.4747	20.8463	17.1388	21.1244	45.7704	6.15477	8.40584	6.17122	8.86596	6.02941	14.828	11.6871	14.8999	12.9068	11.4695	14.2049	12.261	14.3159		8.65618	6.68657	8.83067	8.5266	7.74517	7.88479	10.8343	11.4304	15.5998	14.4428	17.319	16.5755	21.4239	20.7642	17.1391	20.9492
96	Clenbuterol	Calibrant	5.51	4.89371	6.41618	5.50941	5.25895	4.90455	7.05023	6.93571	8.76252	7.48926	10.5279	9.13626	10.2239	10.5699	8.08751	11.2642	19.5778	3.44168	5.66473	4.88948	6.13699	5.08063	8.53906	7.96457	8.70205	8.89968	7.41254	9.2891	7.52022	9.38525		5.56208	4.90868	6.50932	5.53197	5.32543	5.05451	7.01782	7.07903	9.11955	7.88907	10.8183	9.57098	10.7979	11.0734	8.5746	11.1004
97	Fenthion	Test	11.44	7.71739	10.3764	11.4411	10.5427	10.7679	14.1188	15.8538	20.1813	18.9136	21.8282	21.059	29.1241	29.8929	26.7666	30.233	59.2052	7.84543	10.9491	9.72928	11.2048	8.70233	21.6916	18.1308	21.8345	15.7447	14.3367	18.5991	16.6387	18.6656		11.6795	7.77648	10.379	11.4369	10.5267	10.7555	14.1175	15.8418	20.1762	18.9165	21.8092	21.073	29.1298	29.9165	26.6193	30.3485
98	Sulfisomidin	Test	4.505	4.04176	4.67918	4.50941	4.20417	3.96089	5.73602	5.26463	5.75858	4.96942	7.11699	6.20738	6.36387	7.337	5.5815	7.14832	11.1325	2.50583	4.74628	4.42989	4.95297	4.49794	6.70351	5.35318	6.94951	7.43934	5.96072	7.6705	6.00189	7.79484		4.61531	4.02102	4.58003	4.48378	4.13587	3.8103	5.76729	5.1592	5.51817	4.74261	6.87574	5.95811	5.99933	7.05884	5.28652	7.13559
99	Metalaxyl	Test	8.875	6.83074	9.02502	8.88052	8.05388	8.20313	11.195	11.9171	16.1669	15.0867	17.8478	17.2047	22.4913	21.9438	18.2468	22.2626	47.9916	6.39576	8.7086	6.28979	9.12557	6.25212	15.5949	12.3402	15.6691	13.298	11.8677	14.7436	12.791	14.8571		9.01396	6.84138	9.03391	8.86743	8.05612	8.21705	11.2322	11.9407	16.1846	15.0544	17.8919	17.1886	22.4514	21.8702	18.2136	22.08
100	PF5OHxA	Test	ND	ND	ND	ND	ND	ND	ND	ND	ND	ND	ND	ND	ND	ND	ND	ND	ND	ND	ND	ND	ND	ND	ND	ND	ND	ND	ND	ND	ND	ND		ND	ND	ND	ND	ND	ND	ND	ND	ND	ND	ND	ND	ND	ND	ND	ND
101	Sulfamethoxydiazine	Test	5.06	4.52521	5.70211	5.05938	4.81472	4.47737	6.47362	6.19349	7.41677	6.33123	9.03076	7.8012	8.43335	9.07673	6.92322	9.48324	15.5922	3.00977	5.25211	4.73594	5.62333	4.81425	7.69725	6.87922	7.89401	8.24724	6.76141	8.55807	6.83157	8.66344		5.12974	4.49803	5.78434	5.03643	4.85659	4.53556	6.47415	6.27901	7.6239	6.54788	9.20998	8.04609	8.7188	9.34995	7.16002	9.38084
102	Sulfamonomethoxine	Calibrant	5.23	4.66751	5.98755	5.22938	4.98871	4.63828	6.69402	6.47672	7.92981	6.766	9.60864	8.30486	9.10263	9.63491	7.35628	10.1889	17.0695	3.17147	5.40813	4.80073	5.82117	4.91443	8.01227	7.31235	8.19559	8.49479	7.00801	8.83382	7.09079	8.93509		5.29192	4.66888	6.11716	5.24075	5.06576	4.76251	6.69998	6.62901	8.28388	7.13247	9.92507	8.71379	9.61987	10.0969	7.77144	10.1236
103	Sulfamethoxypyridazine	Test	5.595	4.96418	6.5423	5.59942	5.3416	4.99046	7.16313	7.08094	9.02541	7.72268	10.8127	9.40271	10.5876	10.8739	8.32716	11.5818	20.3999	3.52924	5.7471	4.91628	6.23583	5.13356	8.71047	8.15592	8.86739	9.029	7.54203	9.43567	7.65886	9.53058		5.64968	4.94757	6.56666	5.57987	5.36501	5.09995	7.07053	7.14904	9.24771	8.00686	10.9541	9.70369	10.9824	11.2267	8.70121	11.2543
104	Propetamphos	Test	10.29	7.30354	9.84329	10.291	9.44443	9.61422	12.8832	14.0811	18.4243	17.2969	20.154	19.3913	26.2735	26.3636	22.928	26.5614	55.1686	7.25249	9.95166	8.46369	10.2217	7.88633	18.8877	15.7355	18.9908	14.7598	13.3505	16.9181	14.9496	17.0241		10.4945	7.27717	9.84933	10.2967	9.43854	9.63687	12.807	14.1215	18.4883	17.3385	20.171	19.4631	26.3582	26.4496	22.8914	26.7771
105	Brevianamide F	Test	6.22	5.41947	7.25928	6.21954	5.86348	5.5862	7.92571	8.04768	10.7455	9.32129	12.6058	11.2002	13.1021	12.9967	10.0355	13.4367	26.1798	4.13436	6.31319	5.16618	6.88166	5.46445	9.91825	9.21274	10.0394	9.90688	8.42446	10.4474	8.6206	10.5382		6.26245	5.4409	7.20692	6.21842	5.84903	5.6716	7.80529	8.02918	10.8017	9.47618	12.5731	11.3406	13.3064	13.1777	10.3293	13.2219
106	Fosthiazate	Test	8.395	6.63464	8.72608	8.40033	7.60372	7.72533	10.5968	11.2034	15.3536	14.2188	17.0282	16.3466	21.0407	20.39	16.6861	20.6329	44.7974	6.05109	8.28086	6.16607	8.75829	5.96428	14.5155	11.4531	14.5871	12.7417	11.3013	13.9818	12.042	14.0915		8.50905	6.61843	8.7461	8.38749	7.61936	7.74798	10.6655	11.2203	15.3517	14.1808	17.0767	16.3112	20.9857	20.3051	16.6997	20.4801
107	Metolachlor	Test	10.85	7.48818	10.1169	10.8511	9.98648	10.1761	13.5013	14.9463	19.2881	18.0919	20.9944	20.2021	27.6676	28.0845	24.8011	28.3179	57.275	7.54738	10.4393	9.2818	10.687	8.42121	20.241	16.9782	20.3623	15.2636	13.8571	17.7486	15.782	17.84		11.0755	7.46608	10.0975	10.7912	9.92329	10.1314	13.3713	14.8816	19.2438	18.0485	20.9121	20.1809	27.598	27.9942	24.5389	28.3678
108	Penconazole	Test	11.285	7.65448	10.3125	11.2911	10.4025	10.6175	13.9646	15.6234	19.9557	18.7052	21.6205	20.8401	28.7535	29.4331	26.2683	29.7417	58.7354	7.77031	10.8199	9.64922	11.0704	8.65452	21.3205	17.8451	21.4578	15.6273	14.2201	18.3854	16.423	18.4592		11.5268	7.69181	10.3087	11.2668	10.3707	10.5931	13.9221	15.5917	19.9353	18.6923	21.5796	20.841	28.7326	29.4185	26.0781	29.8356
109	Sulfachloropyridazine	Test	5.425	4.83015	6.29925	5.4294	5.18379	4.82832	6.94926	6.80564	8.52668	7.28202	10.2701	8.89891	9.90164	10.301	7.87635	10.97	18.8529	3.36409	5.59146	4.86547	6.04804	5.03323	8.38755	7.78674	8.55612	8.78439	7.2972	9.1589	7.39723	9.25631		5.48452	4.81578	6.36596	5.4184	5.22845	4.94418	6.89357	6.90902	8.80607	7.60297	10.4849	9.24781	10.351	10.7026	8.26898	10.7288
110	Tris(2-chloroethyl) phosphate	Test	7.75	6.32992	8.33081	7.75006	7.04038	7.08155	9.78858	10.2621	14.1751	12.9206	15.8865	15.0381	18.8994	18.2363	14.6175	18.2287	39.8539	5.53537	7.69826	6.19307	8.24614	5.80902	13.0907	10.6271	13.1658	11.9456	10.4909	12.9377	11.0219	13.04		7.82875	6.31985	8.36196	7.78233	7.07906	7.1422	9.8837	10.2899	14.1902	12.9457	15.9457	15.0488	18.9362	18.2495	14.779	18.3815
111	Dibutyl phenyl phosphate	Calibrant	11.775	7.87332	10.5179	11.7811	10.8585	11.1086	14.4632	16.3758	20.6893	19.3863	22.2914	21.5587	29.9674	30.936	27.8912	31.3525	60.2332	8.01529	11.241	9.87217	11.5168	8.78119	22.5381	18.794	22.6943	15.9984	14.5873	19.0767	17.1217	19.1239		12.0227	7.96215	10.5335	11.8248	10.8794	11.1258	14.5538	16.4118	20.721	19.4258	22.3235	21.6033	30.0356	31.0465	27.8502	31.5105
112	4-Androsten-3,17-dione	Test	9.955	7.2001	9.66712	9.9609	9.11901	9.2833	12.5031	13.5703	17.9075	16.8134	19.6351	18.9068	25.4341	25.3435	21.8248	25.5585	53.7563	7.0693	9.66262	7.85009	9.95765	7.47829	18.1017	14.93	18.1957	14.4419	13.0293	16.4191	14.4516	16.5301		10.1496	7.17293	9.65215	9.93638	9.07965	9.27228	12.4074	13.5613	17.919	16.7935	19.6075	18.9181	25.4149	25.2956	21.6805	25.5907
113	Iprobenfos	Test	11.095	7.57959	10.2298	11.1011	10.2239	10.427	13.7667	15.3313	19.6685	18.4409	21.3535	20.5639	28.2846	28.8508	25.6356	29.1232	58.1216	7.67465	10.6559	9.51842	10.9028	8.57304	20.8527	17.479	20.9829	15.4738	14.0672	18.1122	16.1477	18.1943		11.3326	7.6086	10.2365	11.0978	10.2139	10.4306	13.7266	15.3417	19.6932	18.467	21.3473	20.609	28.3346	28.9187	25.5364	29.3207
114	Estriol	Test	ND	ND	ND	ND	ND	ND	ND	ND	ND	ND	ND	ND	ND	ND	ND	ND	ND	ND	ND	ND	ND	ND	ND	ND	ND	ND	ND	ND	ND	ND		ND	ND	ND	ND	ND	ND	ND	ND	ND	ND	ND	ND	ND	ND	ND	ND
115	Terbufos	Test	12.64	8.34052	10.8859	12.6409	11.6557	11.968	15.3281	17.7017	21.9601	20.5926	23.4511	22.8398	32.1272	33.5806	30.6928	34.1637	62.7337	8.45116	11.9725	10.5098	12.3467	9.17175	24.7097	20.9493	24.9003	16.5625	15.1355	20.2401	18.3041	20.2205		12.8715	8.26898	10.8814	12.6578	11.6608	11.9559	15.416	17.6915	21.9308	20.5736	23.4507	22.8066	32.0882	33.5667	30.5897	34.0786
116	Trimethoprim	Calibrant	4.89	4.37936	5.39995	4.88938	4.63338	4.31704	6.24976	5.90769	6.90156	5.90175	8.4428	7.30105	7.776	8.52725	6.49866	8.75513	14.157	2.85049	5.09594	4.65844	5.42099	4.71546	7.38593	6.42358	7.59696	7.99857	6.51426	8.28293	6.5736	8.39319		4.96902	4.38912	5.54279	4.90741	4.70902	4.38001	6.32604	6.03903	7.16908	6.15092	8.71243	7.59021	8.11204	8.84529	6.74772	8.88161
117	Phorate sulfone	Test	8.695	6.75996	8.91275	8.70045	7.88222	8.02375	10.9711	11.6475	15.866	14.7697	17.5419	16.8924	21.9595	21.3647	17.6587	21.6697	46.8407	6.27007	8.54845	6.20507	8.98836	6.12239	15.1875	11.9799	15.2602	13.0927	11.6587	14.459	12.5107	14.5713		8.82448	6.76805	8.93465	8.69998	7.90277	8.05417	11.0392	11.6905	15.9009	14.7589	17.6136	16.893	21.9541	21.3296	17.6856	21.5272
118	Triadimefon	Calibrant	10.245	7.29095	9.82254	10.251	9.40518	9.5741	12.8377	14.0192	18.3619	17.2391	20.092	19.333	26.1726	26.2402	22.7942	26.4387	55.0048	7.23072	9.91669	8.39247	10.1893	7.83938	18.7919	15.6402	18.8939	14.7221	13.3125	16.8579	14.8896	16.9647		10.4528	7.26282	9.82531	10.2516	9.3937	9.5913	12.7565	14.0514	18.4178	17.2716	20.1014	19.396	26.2419	26.3061	22.7398	26.6295
119	Triadimenol	Test	10.415	7.34479	9.9096	10.421	9.57152	9.74464	13.0297	14.2822	18.6262	17.4838	20.3537	19.5802	26.5997	26.7639	23.3629	26.9628	55.6875	7.3225	10.0652	8.68556	10.3276	8.03215	19.1997	16.0397	19.3068	14.8808	13.4725	17.1128	15.1444	17.2161		10.6299	7.31627	9.91022	10.4128	9.55373	9.75403	12.9379	14.3015	18.6689	17.5093	20.349	19.6349	26.6553	26.8175	23.2813	27.1558
120	36OPFHpA	Test	ND	ND	ND	ND	ND	ND	ND	ND	ND	ND	ND	ND	ND	ND	ND	ND	ND	ND	ND	ND	ND	ND	ND	ND	ND	ND	ND	ND	ND	ND		ND	ND	ND	ND	ND	ND	ND	ND	ND	ND	ND	ND	ND	ND	ND	ND
121	Deoxynivalenol	Test	4.905	4.3967	5.43628	4.90938	4.65509	4.33587	6.27628	5.94142	6.96219	5.95195	8.51235	7.35963	7.85262	8.5914	6.54816	8.84135	14.3235	2.86908	5.11432	4.6683	5.44502	4.72701	7.42236	6.47817	7.63167	8.02788	6.54336	8.31526	6.60388	8.42491		4.98785	4.31117	5.35502	4.81582	4.59597	4.2634	6.21629	5.85905	6.828	5.85609	8.33685	7.25037	7.66428	8.47127	6.44228	8.51314
122	Imazalil	Calibrant	9.265	6.97362	9.26558	9.27067	8.43431	8.59252	11.6761	12.5083	16.8061	15.7417	18.5047	17.8484	23.5981	23.185	19.5305	23.4853	50.2931	6.65407	9.05449	6.6697	9.42277	6.6231	16.488	13.2161	16.5674	13.7288	12.306	15.3554	13.3953	15.4701		9.42464	6.9612	9.21843	9.18214	8.34859	8.52324	11.5846	12.4108	16.7045	15.5886	18.404	17.7207	23.3547	22.8779	19.2121	23.1112
123	Quinalphos	Test	11.26	7.64231	10.2996	11.2611	10.3744	10.5874	13.9335	15.5773	19.9105	18.6635	21.5786	20.7964	28.6794	29.3412	26.1685	29.6437	58.64	7.75525	10.794	9.63099	11.0437	8.64336	21.2465	17.7878	21.3826	15.6034	14.1964	18.3424	16.3797	18.4177		11.4962	7.67834	10.2973	11.2397	10.3457	10.5671	13.8908	15.5517	19.8967	18.6563	21.5426	20.8039	28.669	29.3386	25.9915	29.7534
124	FBSA	Test	ND	ND	ND	ND	ND	ND	ND	ND	ND	ND	ND	ND	ND	ND	ND	ND	ND	ND	ND	ND	ND	ND	ND	ND	ND	ND	ND	ND	ND	ND		ND	ND	ND	ND	ND	ND	ND	ND	ND	ND	ND	ND	ND	ND	ND	ND
125	Ditalimfos	Test	10.695	7.43655	10.0466	10.7011	9.84271	10.0256	13.339	14.7149	19.0583	17.8812	20.7743	19.9853	27.2965	27.6243	24.2997	27.8405	56.7419	7.46995	10.3091	9.10056	10.56	8.30347	19.8762	16.6628	19.9924	15.1331	13.7262	17.5282	15.5607	17.6244		10.9205	7.4076	10.0313	10.6532	9.78983	9.9948	13.2123	14.6716	19.0368	17.855	20.7101	19.9842	27.2589	27.5697	24.0834	27.9304
126	Codeine	Calibrant	4.405	3.95058	4.48294	4.40942	4.08664	3.86769	5.5977	5.09566	5.46346	4.73222	6.77113	5.92762	6.00834	7.0339	5.34767	6.75273	10.385	2.41829	4.65414	4.35645	4.82637	4.44016	6.52706	5.06638	6.78297	7.29156	5.81498	7.51002	5.85266	7.63883		4.52356	3.9614	4.41852	4.41779	4.03984	3.71976	5.66728	5.01925	5.26239	4.52791	6.58707	5.70746	5.68381	6.78537	5.06166	6.87185
127	Hydrocodone	Test	4.665	4.18573	4.98869	4.66939	4.38856	4.11047	5.95462	5.53559	6.23678	5.35653	7.67473	6.66269	6.94752	7.83115	5.96221	7.81139	12.3723	2.64879	4.8936	4.53587	5.15261	4.58942	6.98856	5.80969	7.21931	7.67531	6.19389	7.92789	6.24174	8.04575		4.76328	4.18197	5.01968	4.66593	4.3963	4.06266	6.02477	5.54911	6.24321	5.35565	7.68814	6.67124	6.91053	7.83703	5.92407	7.89162
128	Perfluorobutanesulfonic acid	Test	7.73	6.31981	8.31884	7.73005	7.02396	7.06181	9.76387	10.2335	14.1369	12.8783	15.8503	14.9949	18.8301	18.1691	14.5548	18.1539	39.6913	5.51863	7.68028	6.18994	8.22994	5.80664	13.0476	10.6075	13.1229	11.9204	10.4652	12.9054	10.9904	13.0075		7.80792	6.31677	8.35771	7.77587	7.0734	7.13569	9.87498	10.2799	14.1771	12.9318	15.9329	15.0343	18.9132	18.2272	14.7586	18.3588
129	Sulfaquinoxaline	Test	6.565	5.65347	7.56319	6.56963	6.13246	5.92534	8.34969	8.56903	11.6328	10.2007	13.482	12.1664	14.5014	14.2053	11.0412	14.3676	29.4564	4.47168	6.6316	5.40892	7.22022	5.60406	10.6204	9.62305	10.726	10.3909	8.91322	11.019	9.16761	11.1105		6.61479	5.72614	7.55078	6.63896	6.15508	6.04222	8.33129	8.59933	11.7411	10.4034	13.5275	12.3544	14.7924	14.4564	11.4177	14.5186
130	Allethrin	Test	12.555	8.29422	10.8493	12.561	11.5811	11.8882	15.2465	17.5778	21.8425	20.4797	23.3421	22.7202	31.9249	33.3343	30.4354	33.9066	62.5017	8.4099	11.9049	10.4131	12.2673	9.10634	24.506	20.7018	24.6934	16.5147	15.0897	20.1347	18.1967	20.1225		12.7939	8.24517	10.8471	12.5831	11.5879	11.8782	15.3433	17.5716	21.8179	20.4654	23.3455	22.6932	31.8943	33.331	30.3348	33.8405
131	Pipemidic acid	Test	4.945	4.43123	5.50835	4.94938	4.6982	4.37356	6.32917	6.0088	7.08346	6.05263	8.65118	7.47703	8.00647	8.72011	6.64752	9.01352	14.6584	2.9064	5.15108	4.68741	5.49291	4.75016	7.49538	6.58663	7.70128	8.08646	6.60154	8.37996	6.6645	8.4884		5.02557	4.43374	5.6447	4.96014	4.77094	4.44481	6.38734	6.13902	7.35866	6.31584	8.92029	7.77985	8.36359	9.05477	6.91881	9.08856
132	Triallate	Test	13.085	8.59819	11.1087	13.0907	12.0793	12.4157	15.7983	18.4017	22.6202	21.2289	24.075	23.5101	33.2662	34.9647	32.126	35.5778	64.0546	8.6869	12.3513	11.2129	12.7997	9.69521	25.8614	22.5761	26.0696	16.8132	15.3733	20.8214	18.898	20.7558		13.3027	8.41004	11.0746	13.0417	12.0442	12.3638	15.7813	18.3213	22.5234	21.1445	24.0066	23.403	33.111	34.8031	31.9199	35.3173
133	Pirimiphos-methyl	Test	11.79	7.8782	10.5221	11.7911	10.8677	11.1186	14.4732	16.3912	20.7042	19.4003	22.3049	21.5734	29.9923	30.9667	27.9241	31.3855	60.2629	8.02029	11.2495	9.87623	11.5261	8.78334	22.5631	18.8143	22.7197	16.0056	14.5943	19.0906	17.1358	19.1372		12.0328	7.94677	10.5202	11.7909	10.8486	11.0933	14.5164	16.3618	20.6734	19.3812	22.2789	21.5567	29.956	30.9477	27.7425	31.409
134	Butyl diphenyl phosphate	Test	11.57	7.77479	10.4309	11.5711	10.6637	10.8982	14.2512	16.0534	20.3761	19.0942	22.0064	21.2495	29.4459	30.2916	27.1974	30.6604	59.6035	7.91039	11.0609	9.78742	11.323	8.73542	22.0144	18.3798	22.1623	15.8438	14.4347	18.7828	16.8243	18.8424		11.8112	7.86019	10.4475	11.6073	10.6819	10.918	14.3112	16.0918	20.4158	19.1401	22.0362	21.3053	29.5269	30.4129	27.1598	30.8594
135	Tebuconazole	Test	11.32	7.66679	10.3254	11.3211	10.4306	10.6476	13.9956	15.6695	20.0009	18.7469	21.6622	20.8838	28.8275	29.5251	26.368	29.8398	58.8303	7.78535	10.8458	9.66664	11.0971	8.6651	21.3946	17.9023	21.533	15.6511	14.2437	18.4283	16.4663	18.5007		11.5574	7.72225	10.3342	11.3279	10.427	10.6516	13.9925	15.6818	20.0222	18.7731	21.6626	20.9245	28.8756	29.5979	26.273	30.0205
136	Quinoxyfen	Test	13.12	8.61472	11.1248	13.1207	12.1078	12.4454	15.8305	18.4485	22.6641	21.2713	24.1174	23.5544	33.3421	35.0569	32.2206	35.6698	64.1439	8.70285	12.3765	11.2678	12.8302	9.73963	25.9385	22.6993	26.1479	16.8288	15.3879	20.8595	18.937	20.7905		13.331	8.42087	11.0878	13.0658	12.0686	12.3896	15.8041	18.3612	22.5611	21.1809	24.0422	23.4408	33.1761	34.8816	32.0038	35.3952
137	Fensulfothion	Test	8.895	6.8384	9.03748	8.90053	8.07313	8.22308	11.2198	11.9472	16.2001	15.1213	17.8817	17.2388	22.5495	22.0079	18.3123	22.3272	48.116	6.40947	8.72637	6.30263	9.14079	6.26821	15.6403	12.3821	15.7148	13.3206	11.8907	14.7752	12.8221	14.8887		9.03502	6.86897	9.07341	8.93448	8.11791	8.2822	11.3083	12.0407	16.2966	15.1704	18.002	17.3043	22.6469	22.0856	18.4254	22.3002
138	Tripentyl phosphate	Test	13.49	8.80347	11.3388	13.4905	12.4619	12.8121	16.2397	19.0267	23.204	21.7929	24.6491	24.096	34.2732	36.1905	33.3763	36.7779	65.2612	8.90178	12.6857	11.9846	13.2091	10.3761	26.8928	24.3676	27.1158	17.0105	15.5565	21.3213	19.4103	21.208		13.6773	8.6617	11.3365	13.484	12.4919	12.8357	16.2117	19.0508	23.21	21.8097	24.666	24.0902	34.3001	36.2359	33.4413	36.7249
139	Sulfadoxine	Test	5.595	4.96418	6.5423	5.59942	5.3416	4.99046	7.16313	7.08094	9.02541	7.72268	10.8127	9.40271	10.5876	10.8739	8.32716	11.5818	20.3999	3.52924	5.7471	4.91628	6.23583	5.13356	8.71047	8.15592	8.86739	9.029	7.54203	9.43567	7.65886	9.53058		5.64968	4.96434	6.59094	5.60058	5.38191	5.11943	7.0934	7.17904	9.30246	8.05733	11.012	9.76048	11.0616	11.2925	8.75561	11.3204
140	Sulfadimethoxine	Test	6.36	5.51502	7.38814	6.35957	5.9725	5.72162	8.09555	8.25809	11.1082	9.67595	12.9677	11.5919	13.6651	13.48	10.4344	13.8082	27.4938	4.27	6.44065	5.25339	7.01925	5.5254	10.1974	9.39083	10.3119	10.1016	8.6209	10.676	8.83912	10.7669		6.40287	5.59189	7.38798	6.4337	6.00502	5.86013	8.07008	8.31925	11.2868	9.95123	13.0682	11.862	14.066	13.8274	10.8799	13.8802
141	Edifenphos	Test	11.295	7.65857	10.3168	11.3011	10.4119	10.6276	13.9749	15.6388	19.9708	18.7191	21.6344	20.8546	28.7782	29.4638	26.3015	29.7744	58.7671	7.77532	10.8285	9.65511	11.0793	8.65811	21.3452	17.8642	21.4828	15.6352	14.228	18.3997	16.4374	18.4731		11.537	7.71209	10.3258	11.3075	10.4082	10.6321	13.969	15.6518	19.9933	18.7462	21.635	20.8967	28.828	29.5381	26.2081	29.9589
142	Fenamidone	Test	9.745	7.1336	9.54929	9.75083	8.91052	9.07286	12.2557	13.2458	17.5755	16.4971	19.2967	18.5927	24.8888	24.6908	21.1243	24.9288	52.7797	6.94798	9.47807	7.45222	9.79283	7.20635	17.6062	14.4028	17.6951	14.2317	12.8165	16.0981	14.1321	16.2112		9.92937	7.1311	9.56072	9.77471	8.9196	9.10948	12.2308	13.3112	17.6607	16.5423	19.3512	18.6681	24.9827	24.7757	21.1415	25.0567
143	Butachlor	Test	ND	ND	ND	ND	ND	ND	ND	ND	ND	ND	ND	ND	ND	ND	ND	ND	ND	ND	ND	ND	ND	ND	ND	ND	ND	ND	ND	ND	ND	ND		ND	ND	ND	ND	ND	ND	ND	ND	ND	ND	ND	ND	ND	ND	ND	ND
144	Pretilachlor	Test	12.225	8.10742	10.7052	12.2311	11.2747	11.5588	14.9139	17.068	21.3562	20.0154	22.8965	22.227	31.093	32.3188	29.3661	32.8335	61.5475	8.24148	11.625	10.1078	11.9443	8.9127	23.6692	19.797	23.8434	16.3075	14.8895	19.6937	17.7478	19.7093		12.4706	8.13262	10.7013	12.2443	11.2653	11.5346	15.0025	17.0417	21.3181	19.9891	22.8809	22.1934	31.0415	32.2891	29.2038	32.7821
145	Aflatoxin B1	Test	7.575	6.24252	8.22911	7.57999	6.90248	6.9139	9.5789	10.0194	13.8459	12.5567	15.5756	14.6645	18.3044	17.6638	14.0867	17.5973	38.4537	5.39144	7.54528	6.15207	8.10739	5.79043	12.7254	10.4689	12.8028	11.7299	10.2714	12.6627	10.7545	12.7631		7.65188	6.25856	8.27607	7.65312	6.9664	7.01196	9.708	10.0899	13.925	12.6642	15.6871	14.7568	18.4724	17.8033	14.3719	17.9264
146	Nivalenol	Test	4.235	3.79372	4.14729	4.23946	3.88362	3.70977	5.35965	4.80998	4.97084	4.33849	6.19176	5.46211	5.42208	6.52963	4.95757	6.12576	9.16607	2.273	4.4974	4.21941	4.60806	4.33944	6.23011	4.58077	6.50356	7.03987	5.56735	7.23794	5.60022	7.37514		4.36891	3.74806	3.88	4.18757	3.71504	3.42248	5.29882	4.55942	4.44596	3.84626	5.65851	4.90875	4.69671	5.91092	4.33811	6.03638
147	Isoxathion	Test	11.655	7.81614	10.4683	11.6611	10.7473	10.9884	14.3423	16.1916	20.5105	19.2193	22.1289	21.3818	29.6692	30.5677	27.4951	30.9568	59.8752	7.95534	11.1381	9.8242	11.4056	8.75557	22.2385	18.5549	22.39	15.9109	14.501	18.9092	16.9522	18.9637		11.902	7.90575	10.4853	11.7026	10.7685	11.0089	14.4182	16.2318	20.5495	19.2651	22.1624	21.4356	29.7493	30.6904	27.4621	31.1447
148	Triazophos	Test	10.395	7.33841	9.89951	10.401	9.55202	9.72457	13.0073	14.2513	18.5952	17.4552	20.3231	19.5512	26.5496	26.7024	23.296	26.9008	55.6089	7.3118	10.0477	8.65247	10.3112	8.01044	19.1516	15.9935	19.2581	14.8623	13.4539	17.0829	15.1145	17.1867		10.6091	7.31855	9.91357	10.4192	9.56012	9.76053	12.9452	14.3115	18.6789	17.5188	20.3589	19.6444	26.6718	26.8379	23.303	27.1768
149	Kresoxim-methyl	Calibrant	11.22	7.62629	10.2823	11.2211	10.3369	10.5473	13.892	15.5159	19.8501	18.6079	21.5227	20.7382	28.5807	29.2186	26.0354	29.5133	58.5119	7.73515	10.7595	9.60535	11.0083	8.62754	21.1479	17.7112	21.2825	15.5714	14.1645	18.285	16.3219	18.3621		11.4554	7.66157	10.283	11.2058	10.3144	10.5346	13.8516	15.5017	19.8483	18.6113	21.4963	20.7575	28.5894	29.2388	25.8832	29.6505
150	Perfluorohexanoic acid	Test	8.735	6.77597	8.93772	8.74046	7.9201	8.06359	11.0209	11.7072	15.9333	14.841	17.61	16.9627	22.0789	21.4937	17.7891	21.8033	47.1014	6.29837	8.58407	6.21929	9.01888	6.14888	15.2777	12.0572	15.3508	13.1386	11.7055	14.5224	12.5731	14.6349		8.86658	6.80397	8.98238	8.7803	7.97617	8.13235	11.1323	11.8106	16.0377	14.9018	17.7477	17.0361	22.1943	21.5895	17.9388	21.7929
151	Aflatoxin B2	Test	7.27	6.07468	8.04156	7.26987	6.65962	6.60905	9.19892	9.57787	13.2169	11.8675	14.9856	13.9479	17.1834	16.6114	13.1313	16.4934	35.8017	5.12008	7.2657	5.99119	7.8475	5.75714	12.0672	10.2147	12.1507	11.3289	9.86394	12.1597	10.2668	12.2567		7.33084	6.11629	8.07105	7.35265	6.71145	6.71245	9.29383	9.62968	13.2914	11.9957	15.0672	14.0572	17.3762	16.7731	13.4444	16.876
152	Sulfaphenazole	Test	6.07	5.31416	7.10884	6.0695	5.74375	5.44146	7.74307	7.81917	10.3458	8.93785	12.2004	10.7737	12.4955	12.4799	9.6133	13.0288	24.7713	3.9883	6.17646	5.08777	6.73095	5.39237	9.62177	8.99852	9.75066	9.69674	8.21272	10.2024	8.38696	10.2936		6.11279	5.35354	7.10109	6.09946	5.76246	5.56762	7.66296	7.86915	10.528	9.21162	12.2915	11.0485	12.8851	12.8203	10.0284	12.8603
153	Butifos	Test	13.76	8.91482	11.5147	13.7603	12.7233	13.0788	16.5545	19.4485	23.5952	22.1701	25.0475	24.4818	34.9443	37.0127	34.2061	37.5553	66.0954	9.04943	12.9101	12.5048	13.4872	10.926	27.5925	25.7451	27.8248	17.1303	15.6653	21.6493	19.7474	21.5001		13.9252	8.82221	11.4848	13.7095	12.715	13.0681	16.4489	19.4105	23.5485	22.1377	25.0005	24.4246	34.8845	36.9429	34.1826	37.4057
154	Dichlofenthion	Test	12.89	8.48518	11.0056	12.8908	11.8902	12.2169	15.5865	18.0901	22.3272	20.946	23.7951	23.213	32.7601	34.3499	31.4922	34.9568	63.4636	8.58135	12.1833	10.8697	12.5971	9.42931	25.3484	21.8024	25.5488	16.7055	15.2717	20.5655	18.6363	20.5213		13.1123	8.34633	10.9919	12.8846	11.8858	12.1955	15.6328	18.0614	22.2789	20.9084	23.7762	23.1569	32.6881	34.2929	31.3727	34.8084
155	PFEESA	Test	ND	ND	ND	ND	ND	ND	ND	ND	ND	ND	ND	ND	ND	ND	ND	ND	ND	ND	ND	ND	ND	ND	ND	ND	ND	ND	ND	ND	ND	ND		ND	ND	ND	ND	ND	ND	ND	ND	ND	ND	ND	ND	ND	ND	ND	ND
156	Bupirimate	Test	10.99	7.53845	10.1808	10.9911	10.1197	10.3166	13.6507	15.162	19.5015	18.2876	21.1966	20.4046	28.0133	28.5137	25.2687	28.7675	57.755	7.61889	10.5607	9.42408	10.8072	8.51292	20.583	17.262	20.7092	15.3824	13.976	17.9528	15.9872	18.0392		11.2197	7.5508	10.1831	10.9771	10.1005	10.3135	13.5866	15.1617	19.518	18.304	21.1782	20.4418	28.0471	28.5578	25.1462	28.9487
157	Zearalenone	Test	10.435	7.3512	9.91964	10.441	9.59101	9.76471	13.0521	14.3132	18.6572	17.5124	20.3841	19.6092	26.6497	26.8255	23.4299	27.0249	55.7656	7.33318	10.0826	8.71822	10.344	8.05357	19.2478	16.0857	19.3556	14.8992	13.491	17.1426	15.1743	17.2455		10.6508	7.31855	9.91357	10.4192	9.56012	9.76053	12.9452	14.3115	18.6789	17.5188	20.3589	19.6444	26.6718	26.8379	23.303	27.1768
158	Tebupirimfos	Test	12.7	8.37532	10.9138	12.7009	11.7118	12.0277	15.3896	17.7948	22.0483	20.6774	23.5332	22.9295	32.279	33.7652	30.8854	34.3556	62.9082	8.48223	12.0232	10.5883	12.4065	9.22609	24.8627	21.1429	25.0557	16.5977	15.1691	20.3188	18.3844	20.2935		12.9296	8.28096	10.8988	12.695	11.6973	11.9948	15.4519	17.7515	21.9873	20.6278	23.5034	22.8634	32.1853	33.6845	30.717	34.1974
159	Norfloxacin	Test	5.25	4.68401	6.01993	5.24938	5.00868	4.65725	6.71974	6.50984	7.98988	6.81742	9.67577	8.36424	9.18203	9.70109	7.40778	10.2697	17.2458	3.19063	5.42647	4.80767	5.84414	4.92629	8.04957	7.3616	8.23136	8.52383	7.03698	8.8663	7.12136	8.96714		5.3111	4.74653	6.2524	5.33439	5.15339	4.85982	6.80205	6.77901	8.56444	7.38434	10.2265	9.00005	10.0106	10.4205	8.03707	10.4466
160	Enoxacin	Test	5.16	4.60936	5.87219	5.15938	4.91797	4.57195	6.60367	6.36046	7.71901	6.58644	9.37219	8.09719	8.82577	9.4041	7.17694	9.90215	16.4565	3.10463	5.34391	4.7754	5.74026	4.87303	7.88211	7.13705	8.07087	8.39301	6.90655	8.72021	6.98391	8.82307		5.22497	4.68934	6.15366	5.26537	5.08924	4.78846	6.72685	6.66901	8.35886	7.19958	10.0058	8.79015	9.72384	10.183	7.84207	10.2094
161	Zearalanone	Test	9.435	7.03196	9.36806	9.44073	8.60248	8.76252	11.8833	12.7685	17.0805	16.015	18.7877	18.1171	24.0633	23.7208	20.0935	24.0003	51.2161	6.761	9.20478	6.91526	9.55301	6.81802	16.8817	13.6281	16.9641	13.9105	12.4905	15.6199	13.6572	15.7344		9.60356	7.04774	9.38036	9.46085	8.6137	8.79684	11.8896	12.831	17.1564	16.0441	18.8511	18.1732	24.1297	23.7687	20.11	24.0238
162	α-Zearalenol	Test	10.16	7.26273	9.77524	10.161	9.31666	9.48383	12.7348	13.8799	18.2214	17.1081	19.9515	19.2014	25.945	25.9624	22.4932	26.1638	54.6291	7.18132	9.83794	8.22815	10.1168	7.73074	18.577	15.4232	18.6764	14.6364	13.226	16.7223	14.7541	16.8306		10.3588	7.23543	9.77671	10.1616	9.30399	9.50016	12.656	13.9114	18.2762	17.1367	19.9614	19.2608	26.0081	26.0185	22.4369	26.3337
163	β-Zearalenol	Test	10.25	7.29095	9.82254	10.251	9.40518	9.5741	12.8377	14.0192	18.3619	17.2391	20.092	19.333	26.1726	26.2402	22.7942	26.4387	55.0048	7.23072	9.91669	8.39247	10.1893	7.83938	18.7919	15.6402	18.8939	14.7221	13.3125	16.8579	14.8896	16.9647		10.4528	7.26081	9.82186	10.2452	9.3873	9.58479	12.7493	14.0414	18.4077	17.262	20.0914	19.3863	26.2253	26.2856	22.7182	26.6084
164	Terbufos sulfone	Test	9.595	7.08508	9.4626	9.60078	8.76138	8.92264	12.0765	13.0145	17.3368	16.2663	19.0517	18.3647	24.4928	24.2226	20.6249	24.4803	52.0418	6.85875	9.34596	7.18109	9.67635	7.01464	17.2546	14.0257	17.3401	14.0779	12.6605	15.8673	13.9028	15.9814		9.77181	7.08893	9.4675	9.61188	8.75998	8.94665	12.0537	13.0611	17.3995	16.2856	19.0921	18.413	24.5425	24.2527	20.6036	24.52
165	Pyriproxyfen	Test	12.91	8.49665	11.0156	12.9108	11.909	12.2368	15.6075	18.1212	22.3565	20.9743	23.8229	23.2428	32.8107	34.4114	31.5559	35.0194	63.5224	8.59185	12.2001	10.902	12.6173	9.45351	25.3996	21.8761	25.6008	16.7165	15.2822	20.5913	18.6626	20.545		13.1314	8.35778	11.0074	12.9149	11.9162	12.2279	15.6615	18.1113	22.326	20.9538	23.8204	23.2042	32.7694	34.3911	31.4781	34.9066
166	Sulfotep	Test	11.24	7.63427	10.291	11.2411	10.3556	10.5674	13.9128	15.5466	19.8803	18.6357	21.5507	20.7673	28.63	29.2799	26.1019	29.5785	58.5761	7.7452	10.7768	9.61837	11.026	8.63559	21.1972	17.7496	21.3326	15.5874	14.1804	18.3138	16.3508	18.3899		11.4758	7.69181	10.3087	11.2668	10.3707	10.5931	13.9221	15.5917	19.9353	18.6923	21.5796	20.841	28.7326	29.4185	26.0781	29.8356
167	α-Zearalanol	Test	9.105	6.91663	9.16761	9.11061	8.2771	8.43266	11.4796	12.2647	16.5457	15.478	18.2363	17.5893	23.1511	22.6779	19.0024	22.9922	49.3804	6.55035	8.91277	6.48103	9.3007	6.45678	16.1199	12.843	16.1969	13.5544	12.1287	15.1053	13.1479	15.2197		9.25617	6.94732	9.19504	9.14207	8.31098	8.48416	11.5403	12.3508	16.639	15.5219	18.3394	17.6544	23.2416	22.7499	19.0842	22.9801
168	β-Zearalanol	Test	9.92	7.18752	9.64501	9.92089	9.07936	9.2432	12.4563	13.5085	17.8445	16.7537	19.5711	18.8474	25.331	25.2194	21.6913	25.4382	53.5752	7.0465	9.6275	7.77365	9.92608	7.42666	18.007	14.83	18.1	14.4023	12.9893	16.3581	14.3909	16.4697		10.1077	7.17634	9.65938	9.94928	9.09246	9.2853	12.4215	13.5813	17.9395	16.8133	19.6279	18.9379	25.4491	25.3371	21.7237	25.6333
169	Chloramphenicol	Test	6.535	5.63405	7.53939	6.53963	6.1098	5.8962	8.31341	8.52493	11.5593	10.1264	13.4105	12.0854	14.3826	14.1017	10.9539	14.2867	29.177	4.44303	6.60434	5.38507	7.19189	5.5938	10.5597	9.59218	10.6664	10.3498	8.87164	10.97	9.12064	11.0614		6.58442	5.64611	7.45327	6.51477	6.064	5.93166	8.17223	8.42928	11.4669	10.1297	13.2508	12.0568	14.3523	14.0743	11.0904	14.1307
170	Flutolanil	Test	10.03	7.22205	9.70543	10.0309	9.18832	9.35347	12.5847	13.6786	18.0176	16.9172	19.7465	19.0103	25.6137	25.5604	22.0587	25.7695	54.068	7.10887	9.72403	7.98363	10.0131	7.56794	18.2677	15.104	18.3635	14.5106	13.0988	16.5255	14.5577	16.6357		10.2229	7.20957	9.7274	10.0716	9.21424	9.40902	12.5562	13.7714	18.1339	17.0005	19.8205	19.1246	25.7723	25.7301	22.1341	26.0371
171	Sterigmatocystin	Test	10.855	7.4917	10.1215	10.8611	9.99603	10.1862	13.512	14.9618	19.3033	18.1059	21.009	20.2165	27.6923	28.1152	24.8345	28.3499	57.3098	7.55251	10.448	9.29282	10.6955	8.42834	20.2654	16.9988	20.387	15.2722	13.8657	17.7632	15.7967	17.8543		11.0858	7.46608	10.0975	10.7912	9.92329	10.1314	13.3713	14.8816	19.2438	18.0485	20.9121	20.1809	27.598	27.9942	24.5389	28.3678
172	Triphenyl phosphate	Test	11.455	7.72604	10.3848	11.4611	10.5614	10.788	14.1392	15.8845	20.2113	18.9413	21.8557	21.0883	29.1736	29.9543	26.8329	30.2987	59.267	7.85543	10.9663	9.73877	11.2229	8.70784	21.7412	18.1689	21.8849	15.7601	14.352	18.6274	16.6673	18.6929		11.6998	7.80685	10.4038	11.4982	10.5827	10.814	14.1875	15.9318	20.2626	18.9971	21.8912	21.1566	29.2728	30.0954	26.814	30.5327
173	Gliotoxin	Test	7.685	6.29944	8.29491	7.69004	6.99129	7.02234	9.71447	10.1763	14.0601	12.7933	15.7776	14.9078	18.691	18.0346	14.4296	18.0046	39.3644	5.48498	7.6443	6.18237	8.19745	5.80207	12.9614	10.5692	13.0373	11.8698	10.4138	12.8407	10.9275	12.9424		7.76627	6.28913	8.31922	7.71777	7.02258	7.07708	9.79619	10.1899	14.0584	12.8056	15.8172	14.9037	18.7053	18.0266	14.5752	18.1541
174	Tris(1-chloropropyl) phosphate	Test	9.735	7.1304	9.54357	9.74083	8.90058	9.06284	12.2438	13.2303	17.5596	16.4819	19.2805	18.5776	24.8626	24.6597	21.091	24.8989	52.7315	6.9421	9.46927	7.43367	9.78504	7.19344	17.5827	14.3776	17.6713	14.2216	12.8062	16.0828	14.1169	16.1959		9.91888	7.12943	9.55702	9.76822	8.91321	9.10296	12.2237	13.3012	17.6503	16.5322	19.3409	18.658	24.9653	24.7548	21.1199	25.0353
175	Tris(3-chloropropyl) phosphate	Test	9.97	7.20324	9.67262	9.9709	9.12892	9.29332	12.5148	13.5858	17.9232	16.8282	19.651	18.9216	25.4598	25.3745	21.8582	25.5886	53.8013	7.07498	9.6714	7.8692	9.96555	7.49116	18.1254	14.9549	18.2196	14.4518	13.0393	16.4343	14.4668	16.5452		10.1601	7.18838	9.68458	9.99438	9.13732	9.33088	12.4711	13.6513	18.0113	16.8826	19.699	19.007	25.5687	25.4821	21.8749	25.7822
176	4:2FTS	Test	ND	ND	ND	ND	ND	ND	ND	ND	ND	ND	ND	ND	ND	ND	ND	ND	ND	ND	ND	ND	ND	ND	ND	ND	ND	ND	ND	ND	ND	ND		ND	ND	ND	ND	ND	ND	ND	ND	ND	ND	ND	ND	ND	ND	ND	ND
177	Aflatoxin G1	Test	6.89	5.85352	7.7969	6.88974	6.37228	6.23704	8.73689	9.03412	12.3874	10.9801	14.2052	13.0079	15.7506	15.3089	11.9844	15.2742	32.4058	4.77341	6.92194	5.6836	7.51465	5.69323	11.2749	9.91522	11.3689	10.825	9.35269	11.5411	9.66949	11.6345		6.94042	5.93022	7.8115	6.98714	6.4181	6.36099	8.79249	9.08949	12.5021	11.1762	14.2883	13.187	16.0414	15.559	12.3727	15.6396
178	HFPO-DA	Test	ND	ND	ND	ND	ND	ND	ND	ND	ND	ND	ND	ND	ND	ND	ND	ND	ND	ND	ND	ND	ND	ND	ND	ND	ND	ND	ND	ND	ND	ND		ND	ND	ND	ND	ND	ND	ND	ND	ND	ND	ND	ND	ND	ND	ND	ND
179	Aflatoxin G2	Test	6.575	5.65992	7.57104	6.57964	6.14	5.93506	8.36178	8.58371	11.6572	10.2255	13.5056	12.1934	14.5409	14.2399	11.0703	14.3946	29.5494	4.48123	6.64068	5.41697	7.22963	5.60741	10.6407	9.63318	10.7458	10.4046	8.92707	11.0353	9.18327	11.1268		6.62492	5.74878	7.57871	6.6752	6.18186	6.07474	8.37827	8.64935	11.8207	10.4834	13.6077	12.4411	14.9213	14.5689	11.5143	14.6328
180	Fenarimol	Test	10.66	7.42312	10.0275	10.6611	9.80419	9.98546	13.2954	14.6532	18.9968	17.8248	20.715	19.9275	27.1973	27.5015	24.1659	27.714	56.5962	7.44913	10.2743	9.04721	10.5264	8.2687	19.7792	16.5765	19.894	15.0977	13.6907	17.4692	15.5015	17.5665		10.8791	7.4076	10.0313	10.6532	9.78983	9.9948	13.2123	14.6716	19.0368	17.855	20.7101	19.9842	27.2589	27.5697	24.0834	27.9304
181	Ciprofloxacin	Test	5.31	4.7332	6.11548	5.30939	5.06799	4.7142	6.79662	6.6089	8.16965	6.97195	9.8759	8.54246	9.42095	9.90024	7.56295	10.5087	17.7775	3.24825	5.48149	4.82777	5.91268	4.96191	8.16177	7.507	8.33906	8.61085	7.12382	8.96377	7.21318	9.06338		5.36874	4.81578	6.36596	5.4184	5.22845	4.94418	6.89357	6.90902	8.80607	7.60297	10.4849	9.24781	10.351	10.7026	8.26898	10.7288
182	Isofenphos-methyl	Test	11.17	7.60659	10.2606	11.1711	10.2898	10.4972	13.84	15.439	19.7745	18.5384	21.4524	20.6655	28.4573	29.0654	25.8689	29.3505	58.3504	7.70998	10.7164	9.57103	10.9642	8.60616	21.0248	17.6149	21.1576	15.5309	14.1242	18.2132	16.2494	18.2924		11.4043	7.65489	10.2772	11.1923	10.3018	10.5216	13.836	15.4817	19.829	18.5933	21.4777	20.739	28.5576	29.1988	25.8398	29.6093
183	Tetramethrin	Test	12.35	8.17428	10.7566	12.351	11.3859	11.6786	15.0343	17.2531	21.5332	20.1839	23.058	22.4062	31.3949	32.688	29.7562	33.2257	61.8944	8.30241	11.7269	10.2022	12.0609	8.97021	23.9728	20.1059	24.1519	16.3848	14.9644	19.8553	17.9121	19.8612		12.5887	8.17967	10.7581	12.3803	11.3932	11.6708	15.1416	17.2516	21.5163	20.1775	23.0651	22.3911	31.3786	32.7022	29.6529	33.2028
184	Spectinomycin	Test	1.39	1.33972	1.02949	1.39167	1.34177	1.17381	1.33893	1.47437	1.01825	0.767794	1.58774	1.24717	0.94974	1.2407	0.6	1.80188	1.67237	0.835774	1.85383	1.45061	0.669138	1.47544	1.84107	0.916413	2.54003	2.87053	1.59577	2.88635	1.67376	3.34498		2.06812	1.32774	0.907606	1.37483	1.24257	1.38375	1.34736	1.39233	0.867555	0.666486	1.41324	1.12447	0.840178	1.22903	0.6	1.93986
185	Tebufenpyrad	Test	12.56	8.29422	10.8493	12.561	11.5811	11.8882	15.2465	17.5778	21.8425	20.4797	23.3421	22.7202	31.9249	33.3343	30.4354	33.9066	62.5017	8.4099	11.9049	10.4131	12.2673	9.10634	24.506	20.7018	24.6934	16.5147	15.0897	20.1347	18.1967	20.1225		12.7939	8.25112	10.8556	12.6018	11.6061	11.8976	15.3616	17.6015	21.8461	20.4924	23.3718	22.7215	31.9427	33.3899	30.3986	33.9001
186	2-NP-AMOZ	Test	6.04	5.29272	7.07711	6.0395	5.71938	5.41255	7.70644	7.77307	10.2645	8.86081	12.1171	10.6876	12.3739	12.3767	9.52953	12.9451	24.4899	3.95903	6.1491	5.07384	6.70039	5.37719	9.5628	8.95261	9.69329	9.65453	8.17023	10.1534	8.3403	10.2447		6.08296	5.25858	6.9837	5.97371	5.66993	5.45715	7.51546	7.69912	10.2325	8.92893	11.986	10.735	12.4362	12.4417	9.71105	12.4778
187	Fenbuconazole	Test	10.86	7.4917	10.1215	10.8611	9.99603	10.1862	13.512	14.9618	19.3033	18.1059	21.009	20.2165	27.6923	28.1152	24.8345	28.3499	57.3098	7.55251	10.448	9.29282	10.6955	8.42834	20.2654	16.9988	20.387	15.2722	13.8657	17.7632	15.7967	17.8543		11.0858	7.51058	10.1438	10.8905	10.0183	10.229	13.4862	15.0317	19.391	18.1857	21.0551	20.3208	27.839	28.2964	24.8642	28.6793
188	Erucamide	Test	15.69	8.35026	13.1229	15.6878	14.573	14.9574	19.3247	22.2823	26.1249	24.574	27.8873	26.7579	39.1316	42.5676	39.7295	42.3455	72.1744	10.1135	14.4821	13.3772	15.4	14.7312	32.6535	36.56	32.9268	17.6823	16.1089	23.7584	21.9311	23.2635		15.5626	8.32913	13.1462	15.7264	14.5775	14.9256	19.3981	22.2967	26.1723	24.6246	27.9231	26.7987	39.1966	42.6128	39.8546	42.3809
189	15-AcDON	Test	6.225	5.42638	7.26884	6.22954	5.87135	5.59586	7.93786	8.0628	10.7718	9.34674	12.6321	11.2284	13.1424	13.0312	10.0638	13.4634	26.2738	4.14407	6.3223	5.17195	6.89159	5.46902	9.93811	9.22614	10.0588	9.92084	8.43853	10.4637	8.63619	10.5546		6.27245	5.4409	7.20692	6.21842	5.84903	5.6716	7.80529	8.02918	10.8017	9.47618	12.5731	11.3406	13.3064	13.1777	10.3293	13.2219
190	Piperonyl butoxide	Test	12.78	8.42171	10.9518	12.7809	11.7868	12.1074	15.4721	17.919	22.1658	20.7904	23.643	23.049	32.4815	34.0115	31.1414	34.6099	63.1414	8.52383	12.0907	10.7009	12.4865	9.30582	25.067	21.4118	25.2631	16.6437	15.2131	20.4231	18.4908	20.39		13.0067	8.30953	10.9402	12.781	11.7824	12.0854	15.5344	17.8914	22.119	20.7544	23.6264	22.9959	32.4122	33.9593	31.0135	34.4739
191	3-Methylphenyl diphenyl phosphate	Test	12.055	8.0156	10.6338	12.0611	11.1174	11.3888	14.7437	16.8062	21.1049	19.7772	22.6682	21.9737	30.6664	31.7961	28.8109	32.2753	61.0546	8.15567	11.4802	10.0013	11.7809	8.85105	23.2405	19.393	23.4079	16.1943	14.7793	19.4627	17.5131	19.4911		12.3023	8.08602	10.6505	12.1195	11.1493	11.4113	14.872	16.8517	21.1385	19.819	22.7136	22.0149	30.7373	31.9149	28.7965	32.4
192	Thiophanate-methyl	Calibrant	7.67	6.2892	8.28295	7.67003	6.97503	7.00261	9.6898	10.1478	14.0215	12.7506	15.7411	14.864	18.6212	17.9673	14.3671	17.9302	39.2001	5.46809	7.6263	6.17791	8.18115	5.79987	12.9184	10.5504	12.9945	11.8444	10.388	12.8084	10.8961	12.9098		7.74545	6.28301	8.31062	7.70485	7.01132	7.06405	9.77861	10.1699	14.0318	12.7775	15.7913	14.8745	18.6589	17.9819	14.5345	18.1085
193	Carbophenothion (peak2)	Test	13.23	8.67405	11.1853	13.2307	12.2125	12.5546	15.9498	18.6203	22.825	21.4267	24.2737	23.7166	33.6198	35.3945	32.5663	36.0044	64.473	8.76155	12.4686	11.4748	12.9424	9.91221	26.2216	23.1667	26.4351	16.8849	15.4404	20.9982	19.079	20.9167		13.4347	8.49279	11.1695	13.2102	12.2153	12.5449	15.9418	18.6011	22.7868	21.3994	24.257	23.6675	33.5671	35.3526	32.5062	35.8611
194	Boscalid	Test	9.955	7.2001	9.66712	9.9609	9.11901	9.2833	12.5031	13.5703	17.9075	16.8134	19.6351	18.9068	25.4341	25.3435	21.8248	25.5585	53.7563	7.0693	9.66262	7.85009	9.95765	7.47829	18.1017	14.93	18.1957	14.4419	13.0293	16.4191	14.4516	16.5301		10.1496	7.18319	9.6738	9.97505	9.1181	9.31135	12.4498	13.6213	17.9806	16.853	19.6686	18.9774	25.5175	25.42	21.8101	25.7184
195	Oxadiazon	Test	12.705	8.38112	10.9185	12.7109	11.7212	12.0377	15.3999	17.8103	22.063	20.6915	23.5469	22.9444	32.3043	33.796	30.9174	34.3875	62.9373	8.48742	12.0316	10.6019	12.4165	9.2356	24.8882	21.1758	25.0816	16.6035	15.1747	20.3318	18.3977	20.3056		12.9392	8.29307	10.9164	12.732	11.7337	12.0336	15.4874	17.8115	22.0438	20.6821	23.5561	22.9202	32.2825	33.8023	30.8442	34.316
196	Isofenphos	Test	11.685	7.83021	10.4807	11.6911	10.7751	11.0185	14.3725	16.2376	20.5553	19.2611	22.1696	21.4259	29.7437	30.6598	27.5942	31.0557	59.9652	7.97032	11.1639	9.83618	11.4333	8.76201	22.3133	18.6139	22.4659	15.933	14.5228	18.9512	16.9947	19.0039		11.9322	7.91852	10.4961	11.7298	10.7932	11.0349	14.4486	16.2718	20.5877	19.3008	22.1983	21.4728	29.8129	30.7696	27.5484	31.226
197	Cefalexin	Test	4.875	4.37068	5.38171	4.87938	4.6225	4.30763	6.23647	5.89082	6.87126	5.87669	8.408	7.27178	7.73776	8.49523	6.47396	8.71199	14.0741	2.8412	5.08675	4.65344	5.40894	4.7097	7.36773	6.39619	7.57963	7.98391	6.49971	8.26676	6.55847	8.37734		4.95961	4.37155	5.50154	4.88671	4.68408	4.35409	6.30162	5.99904	7.09324	6.08517	8.62911	7.51451	8.01196	8.76183	6.67956	8.79927
198	Cefradine	Test	5.195	4.64267	5.93849	5.19938	4.95855	4.60984	6.65537	6.42696	7.83956	6.68896	9.50758	8.21582	8.98378	9.53583	7.27925	10.0667	16.806	3.14278	5.38061	4.79008	5.78659	4.89667	7.95641	7.23777	8.14204	8.45119	6.96454	8.78512	7.04496	8.88706		5.2632	4.65873	6.09878	5.22854	5.05399	4.74954	6.68664	6.60901	8.24634	7.09893	9.88463	8.67561	9.56795	10.0539	7.73618	10.0807
199	PFPeS	Test	ND	ND	ND	ND	ND	ND	ND	ND	ND	ND	ND	ND	ND	ND	ND	ND	ND	ND	ND	ND	ND	ND	ND	ND	ND	ND	ND	ND	ND	ND		ND	ND	ND	ND	ND	ND	ND	ND	ND	ND	ND	ND	ND	ND	ND	ND
200	Lomefloxacin	Test	5.39	4.79804	6.2391	5.38939	5.1456	4.79025	6.89854	6.74027	8.40808	7.17854	10.1396	8.78012	9.74103	10.1671	7.77144	10.8188	18.4927	3.3254	5.55481	4.85319	6.00318	5.00947	8.31209	7.69519	8.48352	8.72662	7.23946	9.09383	7.33582	9.19194		5.44585	4.88661	6.47611	5.50489	5.30272	5.02855	6.98811	7.03903	9.04607	7.82175	10.7403	9.49505	10.6926	10.986	8.50245	11.0127
201	AltertoxinⅠ	Test	8.845	6.81916	9.00633	8.85051	8.02506	8.17322	11.1577	11.872	16.117	15.0345	17.7969	17.1534	22.4036	21.8476	18.1485	22.1652	47.8037	6.3751	8.68193	6.27186	9.10272	6.22862	15.5268	12.278	15.6007	13.264	11.8332	14.6963	12.7444	14.8095		8.98238	6.82719	9.01412	8.83391	8.02531	8.18447	11.1939	11.8906	16.1283	14.996	17.8366	17.1302	22.3529	21.7624	18.1078	21.9696
202	Piperophos	Test	12.02	7.99455	10.6172	12.0211	11.0804	11.3488	14.7037	16.7446	21.0456	19.7212	22.6145	21.9142	30.5663	31.6732	28.6799	32.1437	60.9381	8.13556	11.4461	9.97999	11.7428	8.83921	23.1399	19.3029	23.3056	16.1671	14.7526	19.408	17.4576	19.4392		12.2626	8.0678	10.6319	12.0731	11.1064	11.3659	14.8228	16.7817	21.0722	19.7564	22.6519	21.9493	30.6255	31.7769	28.6462	32.259
203	Fusarenon-X	Test	5.375	4.78998	6.22389	5.37939	5.13599	4.78074	6.88583	6.7239	8.37836	7.15269	10.1069	8.75042	9.70093	10.1336	7.74528	10.7806	18.4029	3.31573	5.54565	4.85009	5.99192	5.00353	8.29325	7.67203	8.46541	8.71216	7.22501	9.07757	7.32048	9.17585		5.43619	4.77828	6.30524	5.37284	5.18813	4.89875	6.84393	6.83901	8.67615	7.48521	10.3461	9.11445	10.1675	10.5505	8.14391	10.5766
204	Thiamphenicol	Test	5.005	4.48267	5.61486	5.00937	4.76213	4.43015	6.40815	6.10966	7.26533	6.20429	8.85867	7.65363	8.23865	8.91416	6.79746	9.27062	15.1654	2.96265	5.2062	4.71458	5.56428	4.78504	7.6053	6.74731	7.80617	8.17422	6.68877	8.47708	6.75557	8.5838		5.08232	4.43826	5.65479	4.96549	4.77709	4.45129	6.39349	6.14902	7.37762	6.33237	8.94104	7.79884	8.38885	9.07578	6.93598	9.10934
205	Danofloxacin	Test	5.34	4.75761	6.16235	5.33939	5.09729	4.74271	6.83492	6.65826	8.25924	7.04936	9.97523	8.63159	9.54079	10.0001	7.64092	10.6261	18.0449	3.27714	5.50899	4.83746	5.94674	4.97975	8.21805	7.57835	8.39312	8.6543	7.16721	9.01253	7.25914	9.11156		5.39762	4.84829	6.41723	5.45802	5.26282	4.98312	6.93682	6.96902	8.91705	7.70393	10.6032	9.362	10.5085	10.8332	8.37654	10.8596
206	Florfenicol	Test	5.595	4.96418	6.5423	5.59942	5.3416	4.99046	7.16313	7.08094	9.02541	7.72268	10.8127	9.40271	10.5876	10.8739	8.32716	11.5818	20.3999	3.52924	5.7471	4.91628	6.23583	5.13356	8.71047	8.15592	8.86739	9.029	7.54203	9.43567	7.65886	9.53058		5.64968	4.92531	6.53402	5.55242	5.34242	5.07399	7.0403	7.10903	9.17454	7.93955	10.8766	9.62789	10.877	11.1391	8.62881	11.1663
207	Enrofloxacin	Test	5.47	4.86204	6.35828	5.4694	5.22157	4.86642	6.99982	6.87079	8.64484	7.3856	10.3995	9.01763	10.0626	10.4353	7.98171	11.1185	19.2146	3.40285	5.6281	4.87754	6.09264	5.05696	8.4632	7.87655	8.62896	8.84207	7.3549	9.22399	7.4587	9.32075		5.52326	4.93643	6.55038	5.56612	5.35372	5.08697	7.05538	7.12903	9.21115	7.97321	10.9154	9.6658	10.9297	11.1829	8.66499	11.2103
208	Chlorthiophos	Test	13.275	8.70025	11.2137	13.2806	12.2603	12.6042	16.0046	18.6984	22.898	21.4973	24.3452	23.79	33.7458	35.5478	32.7229	36.1551	64.6234	8.78836	12.5105	11.5713	12.9936	9.99554	26.3505	23.3874	26.5658	16.9099	15.4636	21.0609	19.1432	20.9734		13.4817	8.51615	11.1942	13.2525	12.2582	12.5901	15.9825	18.6711	22.8526	21.4631	24.32	23.7335	33.6811	35.49	32.6522	35.9963
209	Ofloxacin	Calibrant	5.15	4.601	5.85545	5.14938	4.90776	4.56248	6.59072	6.3438	7.68884	6.56085	9.33823	8.06755	8.78636	9.37123	7.15144	9.86071	16.3695	3.09511	5.33473	4.77163	5.72864	4.86714	7.86357	7.11165	8.05311	8.37845	6.89204	8.70399	6.96866	8.80709		5.21543	4.64358	6.07108	5.21034	5.0363	4.73008	6.66674	6.57901	8.19	7.04865	9.82386	8.61834	9.49016	9.98943	7.68337	10.0165
210	Oxyfluorfen	Test	12.495	8.25967	10.8224	12.501	11.5252	11.8284	15.1857	17.4849	21.7542	20.3951	23.2607	22.6304	31.7733	33.1496	30.2418	33.7129	62.328	8.37907	11.8541	10.3465	12.208	9.06238	24.3534	20.5238	24.5385	16.4783	15.0546	20.0553	18.1158	20.0484		12.7355	8.23323	10.8301	12.5455	11.5514	11.8393	15.3063	17.5116	21.7614	20.4113	23.2929	22.6365	31.7974	33.2131	30.2072	33.7213
211	Bezafibrate	Calibrant	9.515	7.05871	9.41558	9.52076	8.68189	8.84257	11.9801	12.8914	17.2088	16.1414	18.92	18.2415	24.279	23.972	20.359	24.2407	51.634	6.81022	9.2754	7.04455	9.61458	6.91502	17.0679	13.826	17.1518	13.9946	12.5759	15.7438	13.7801	15.8581		9.6877	7.07848	9.44489	9.5726	8.72176	8.90757	12.0111	13.0011	17.3364	16.2231	19.0295	18.3509	24.4356	24.1267	20.4747	24.3908
212	2-Ethylhexyl diphenyl phosphate	Test	13.41	8.76558	11.29	13.4105	12.3849	12.733	16.1492	18.9016	23.0876	21.6805	24.5327	23.9799	34.0727	35.9459	33.1282	36.5425	65.0171	8.85842	12.619	11.8265	13.1269	10.2256	26.686	23.9842	26.9061	16.9729	15.5219	21.2226	19.3091	21.1194		13.603	8.61647	11.2939	13.4164	12.4241	12.7646	16.1435	18.9409	23.1066	21.7093	24.5652	23.9872	34.121	36.0199	33.2136	36.515
213	Hydrocorticosterone	Calibrant	8.495	6.67746	8.78813	8.50037	7.69539	7.82473	10.7216	11.3507	15.5261	14.4057	17.2	16.5322	21.3516	20.7162	17.0092	20.9853	45.4958	6.12542	8.37015	6.16778	8.83526	6.00931	14.7385	11.6181	14.8103	12.8599	11.4217	14.1413	12.1985	14.2518		8.61413	6.68015	8.82264	8.51331	7.73313	7.87176	10.8183	11.4104	15.5764	14.4181	17.2961	16.5507	21.3825	20.7206	17.0972	20.9046
214	Perfluoroheptanoic acid	Test	9.67	7.10786	9.5033	9.67081	8.83098	8.99273	12.1603	13.1223	17.4483	16.3746	19.1664	18.4715	24.6783	24.4413	20.8578	24.6896	52.3905	6.90067	9.40764	7.30553	9.73059	7.10349	17.4184	14.2014	17.5055	14.1501	12.7337	15.9752	14.0099	16.0888		9.84536	7.1261	9.54962	9.75524	8.90042	9.08994	12.2096	13.2812	17.6295	16.5118	19.3203	18.6378	24.9303	24.7131	21.0769	24.9925
215	Pyridaben	Test	13.75	8.91122	11.5079	13.7503	12.7136	13.069	16.5426	19.4329	23.5807	22.1562	25.0326	24.4677	34.9196	36.9824	34.1756	37.527	66.0642	9.04392	12.9018	12.4863	13.4769	10.9047	27.5665	25.692	27.7986	17.126	15.6615	21.6373	19.735	21.4895		13.9161	8.82221	11.4848	13.7095	12.715	13.0681	16.4489	19.4105	23.5485	22.1377	25.0005	24.4246	34.8845	36.9429	34.1826	37.4057
216	Diacetoxyscirpenol	Test	7.555	6.23202	8.21714	7.55998	6.88649	6.89419	9.5543	9.99086	13.8065	12.5132	15.5385	14.6196	18.2335	17.5963	14.0246	17.5239	38.2863	5.37428	7.52727	6.14502	8.0909	5.7884	12.6826	10.4514	12.7604	11.7043	10.2454	12.6303	10.723	12.7305		7.63111	6.24024	8.24996	7.61426	6.93282	6.97289	9.65477	10.0298	13.8443	12.5786	15.6084	14.6678	18.3317	17.6692	14.2502	17.7896
217	Anilofos	Test	11.295	7.65857	10.3168	11.3011	10.4119	10.6276	13.9749	15.6388	19.9708	18.7191	21.6344	20.8546	28.7782	29.4638	26.3015	29.7744	58.7671	7.77532	10.8285	9.65511	11.0793	8.65811	21.3452	17.8642	21.4828	15.6352	14.228	18.3997	16.4374	18.4731		11.537	7.72225	10.3342	11.3279	10.427	10.6516	13.9925	15.6818	20.0222	18.7731	21.6626	20.9245	28.8756	29.5979	26.273	30.0205
218	Tris(4-methylphenyl) phosphate	Test	13.065	8.58709	11.098	13.0707	12.0603	12.3958	15.7769	18.3705	22.591	21.2006	24.0468	23.4804	33.2156	34.9033	32.0629	35.5163	63.9952	8.67629	12.3346	11.1768	12.7794	9.66625	25.81	22.495	26.0175	16.8027	15.3634	20.796	18.872	20.7326		13.2837	8.43771	11.1078	13.1019	12.1052	12.4285	15.8383	18.4212	22.6175	21.2355	24.0957	23.4975	33.2738	34.9994	32.1296	35.512
219	Fleroxacin	Test	5.13	4.58425	5.8218	5.12938	4.88727	4.54355	6.56478	6.31047	7.62846	6.50971	9.27018	8.00829	8.70764	9.30559	7.10052	9.77751	16.1958	3.07609	5.31638	4.76399	5.70535	4.85535	7.82652	7.06058	8.01765	8.34932	6.86303	8.67155	6.93816	8.77513		5.19635	4.59878	5.98689	5.15663	4.98291	4.67171	6.6078	6.48901	8.02062	6.898	9.64083	8.44653	9.25745	9.79664	7.52545	9.82451
220	Ochratoxin B	Test	8.7	6.75996	8.91275	8.70045	7.88222	8.02375	10.9711	11.6475	15.866	14.7697	17.5419	16.8924	21.9595	21.3647	17.6587	21.6697	46.8407	6.27007	8.54845	6.20507	8.98836	6.12239	15.1875	11.9799	15.2602	13.0927	11.6587	14.459	12.5107	14.5713		8.82448	6.80397	8.98238	8.7803	7.97617	8.13235	11.1323	11.8106	16.0377	14.9018	17.7477	17.0361	22.1943	21.5895	17.9388	21.7929
221	Bis(2-ethylhexyl) adipate	Test	15.175	8.78527	12.6788	15.1787	14.1046	14.4665	18.5013	21.5892	25.5318	24.0141	27.1866	26.2663	38.1772	41.1808	38.3474	41.2624	70.6186	9.83913	14.0724	13.6733	14.9209	13.9654	31.3089	33.9328	31.577	17.5867	16.0468	23.2429	21.3946	22.8547		15.1548	8.94496	12.6718	15.2325	14.1042	14.4643	18.5389	21.578	25.551	24.049	27.1688	26.2821	38.227	41.2062	38.4941	41.2432
222	Pyrazophos	Test	11.86	7.91274	10.551	11.8611	10.9325	11.1887	14.5435	16.4987	20.8083	19.4978	22.3993	21.677	30.1667	31.1816	28.1546	31.6163	60.4696	8.05531	11.3094	9.90533	11.5916	8.79879	22.7383	18.9584	22.8977	16.0556	14.6434	19.1877	17.2342	19.2298		12.1029	7.98625	10.5549	11.8788	10.9286	11.1777	14.6131	16.4918	20.7971	19.4973	22.3948	21.678	30.1629	31.2046	28.0226	31.6727
223	Etofenprox	Calibrant	14.39	9.03359	11.9911	14.3897	13.3398	13.6979	17.3541	20.4226	24.4888	23.0262	26.0016	25.3349	36.4575	38.9033	36.0927	39.2795	68.0933	9.3996	13.4296	13.4277	14.1341	12.3388	29.2348	29.3244	29.4863	17.3683	15.8735	22.3843	20.505	22.1396		14.4868	9.19916	11.9665	14.3766	13.3394	13.7062	17.2587	20.3996	24.4752	23.0309	25.959	25.315	36.4632	38.8887	36.1855	39.2209
224	NaDONA	Test	ND	ND	ND	ND	ND	ND	ND	ND	ND	ND	ND	ND	ND	ND	ND	ND	ND	ND	ND	ND	ND	ND	ND	ND	ND	ND	ND	ND	ND	ND		ND	ND	ND	ND	ND	ND	ND	ND	ND	ND	ND	ND	ND	ND	ND	ND
225	Neosolaniol	Test	5.45	4.84612	6.3289	5.4494	5.20273	4.84737	6.97456	6.83825	8.58582	7.3338	10.3349	8.95828	9.98208	10.3681	7.92898	11.0446	19.0335	3.38346	5.60978	4.87152	6.07037	5.0451	8.42535	7.83186	8.59251	8.81324	7.32606	9.19144	7.42795	9.28852		5.50388	4.85374	6.4257	5.46467	5.26853	4.98961	6.94409	6.97902	8.93552	7.72076	10.6228	9.38102	10.5348	10.855	8.3945	10.8814
226	Furathiocarb	Test	ND	ND	ND	ND	ND	ND	ND	ND	ND	ND	ND	ND	ND	ND	ND	ND	ND	ND	ND	ND	ND	ND	ND	ND	ND	ND	ND	ND	ND	ND		ND	ND	ND	ND	ND	ND	ND	ND	ND	ND	ND	ND	ND	ND	ND	ND
227	Sarafloxacin	Test	5.58	4.94862	6.51477	5.57941	5.3234	4.97135	7.1381	7.04877	8.96723	7.67079	10.7499	9.34356	10.5067	10.8062	8.27371	11.5124	20.2167	3.50976	5.7288	4.9103	6.21397	5.12184	8.67229	8.11421	8.83054	9.0003	7.51328	9.40309	7.62802	9.49826		5.63019	5.02055	6.67056	5.6704	5.438	5.18436	7.17084	7.27905	9.48417	8.22548	11.2037	9.94943	11.3256	11.5123	8.93751	11.5412
228	Roquefortine C	Test	9.305	6.98754	9.28986	9.31068	8.47379	8.6325	11.725	12.5694	16.8709	15.8067	18.5715	17.9122	23.7084	23.3114	19.6628	23.6071	50.5146	6.67953	9.08988	6.72356	9.45336	6.66741	16.5804	13.3118	16.6605	13.7719	12.3497	15.4178	13.457	15.5325		9.46675	6.98775	9.26502	9.26211	8.42403	8.60142	11.6726	12.5309	16.8347	15.7207	18.5327	17.8521	23.5791	23.1333	19.4681	23.3728
229	8-Methylnonyl diphenyl phosphate	Test	14.06	9.00014	11.7306	14.06	13.0162	13.3742	16.9232	19.915	24.025	22.583	25.4988	24.8977	35.6762	37.919	35.1136	38.3908	67.0394	9.21544	13.1582	13.013	13.7962	11.5889	28.373	27.4018	28.615	17.2508	15.7724	22.0047	20.1133	21.8121		14.1956	9.06932	11.7438	14.0779	13.0662	13.4292	16.8751	19.97	24.074	22.6455	25.5355	24.9348	35.7846	38.0434	35.3223	38.4438
230	DNOP	Test	15.125	8.81618	12.6342	15.1288	14.0572	14.4181	18.4239	21.5182	25.4696	23.9555	27.1141	26.213	38.0762	41.0408	38.2087	41.1454	70.4613	9.81166	14.032	13.6868	14.8725	13.876	31.1773	33.6543	31.4446	17.5755	16.0386	23.1907	21.3404	22.8124		15.1138	8.99466	12.6205	15.1749	14.0518	14.413	18.4446	21.4981	25.4799	23.9825	27.0852	26.2208	38.1135	41.0494	38.3406	41.1119
231	Permethrin (peak2)	Test	14.22	9.02512	11.8541	14.2199	13.173	13.5313	17.1286	20.1621	24.2513	22.7996	25.7421	25.1126	36.0586	38.3981	35.5909	38.8254	67.5489	9.3046	13.29	13.2358	13.9604	11.9526	28.7905	28.3248	29.0372	17.3097	15.8236	22.1902	20.3046	21.973		14.3377	9.14304	11.85	14.2221	13.1992	13.5645	17.0561	20.1798	24.2703	22.8343	25.741	25.122	36.1177	38.4562	35.7452	38.8257
232	Sparfloxacin	Test	5.92	5.20576	6.94435	5.91947	5.62029	5.2971	7.55946	7.58728	9.93501	8.55165	11.7766	10.341	11.8867	11.9647	9.19667	12.6007	23.3662	3.8418	6.03959	5.02323	6.57674	5.31429	9.328	8.75838	9.46518	9.4851	7.99979	9.95753	8.1539	10.0494		5.964	5.30349	7.03959	6.03276	5.71356	5.50913	7.58436	7.77913	10.3721	9.06214	12.1306	10.8829	12.6476	12.6197	9.8601	12.6576
233	Dexamethasone	Test	9.165	6.93826	9.20449	9.17063	8.3359	8.49259	11.5534	12.3559	16.6436	15.5776	18.3372	17.6872	23.3198	22.8684	19.2002	23.1783	49.7278	6.5896	8.96594	6.5466	9.34643	6.517	16.2577	12.9809	16.3355	13.6202	12.1956	15.1992	13.2408	15.3138		9.31935	6.97023	9.23398	9.20882	8.37371	8.5493	11.614	12.4509	16.748	15.6328	18.447	17.7647	23.4298	22.9631	19.2974	23.1984
234	Ergocalciferol	Test	ND	ND	ND	ND	ND	ND	ND	ND	ND	ND	ND	ND	ND	ND	ND	ND	ND	ND	ND	ND	ND	ND	ND	ND	ND	ND	ND	ND	ND	ND		ND	ND	ND	ND	ND	ND	ND	ND	ND	ND	ND	ND	ND	ND	ND	ND
235	Sucralose	Test	5.555	4.933	6.48696	5.55941	5.30511	4.95226	7.11304	7.01654	8.90891	7.61892	10.6868	9.28438	10.4258	10.7386	8.22038	11.4424	20.0337	3.49029	5.7105	4.90435	6.19206	5.1101	8.63416	8.07203	8.79376	8.97158	7.48451	9.37052	7.59721	9.46595		5.61071	4.88111	6.46776	5.49815	5.29703	5.02206	6.98073	7.02903	9.02767	7.80492	10.7208	9.47605	10.6663	10.9641	8.48444	10.9908
236	Tris(2-butoxyethyl) phosphate	Test	12.385	8.19688	10.774	12.391	11.423	11.7186	15.0746	17.3148	21.5922	20.2402	23.112	22.4659	31.4957	32.8111	29.8859	33.356	62.0099	8.3228	11.7609	10.2377	12.1	8.99244	24.0742	20.2137	24.2548	16.41	14.9888	19.9088	17.9666	19.9114		12.6279	8.20281	10.7883	12.4506	11.4602	11.7421	15.2123	17.3616	21.6201	20.2763	23.1615	22.4948	31.5556	32.9184	29.8876	33.4225
237	FHxSA	Test	ND	ND	ND	ND	ND	ND	ND	ND	ND	ND	ND	ND	ND	ND	ND	ND	ND	ND	ND	ND	ND	ND	ND	ND	ND	ND	ND	ND	ND	ND		ND	ND	ND	ND	ND	ND	ND	ND	ND	ND	ND	ND	ND	ND	ND	ND
238	Difloxacin	Test	5.71	5.04882	6.68861	5.70943	5.43997	5.09566	7.3002	7.25678	9.34278	8.00803	11.1529	9.72714	11.0336	11.2473	8.62302	11.9508	21.413	3.63654	5.84772	4.95	6.35486	5.1973	8.92133	8.37689	9.07115	9.18645	7.69987	9.61495	7.82867	9.70858		5.75724	5.09416	6.77111	5.76274	5.51038	5.26878	7.27424	7.40907	9.71846	8.4438	11.4498	10.1941	11.6693	11.7989	9.1753	11.8297
239	Perfluorohexanesulfonic acid	Test	9.67	7.10786	9.5033	9.67081	8.83098	8.99273	12.1603	13.1223	17.4483	16.3746	19.1664	18.4715	24.6783	24.4413	20.8578	24.6896	52.3905	6.90067	9.40764	7.30553	9.73059	7.10349	17.4184	14.2014	17.5055	14.1501	12.7337	15.9752	14.0099	16.0888		9.84536	7.1311	9.56072	9.77471	8.9196	9.10948	12.2308	13.3112	17.6607	16.5423	19.3512	18.6681	24.9827	24.7757	21.1415	25.0567
240	Moxifloxacin	Test	6.015	5.27837	7.05563	6.01949	5.70304	5.39329	7.68199	7.74226	10.2101	8.80938	12.0612	10.6301	12.2927	12.308	9.4738	12.8888	24.3024	3.9395	6.13086	5.06485	6.67993	5.36695	9.52354	8.92142	9.65513	9.62635	8.14187	10.1208	8.30921	10.2121		6.0631	5.39205	7.14793	6.15147	5.80039	5.61311	7.72485	7.93916	10.6482	9.32755	12.4154	11.1766	13.0696	12.9765	10.1598	13.0183
241	Oxacillin	Test	7.87	6.38967	8.40277	7.87011	7.14001	7.20008	9.93711	10.4341	14.4015	13.1714	16.102	15.2938	19.3106	18.6381	14.9949	18.679	40.8169	5.63477	7.8061	6.20332	8.34268	5.82503	13.3504	10.7507	13.4242	12.0961	10.644	13.1314	11.2105	13.2351		7.95391	ND	ND	ND	ND	ND	ND	ND	ND	ND	ND	ND	ND	ND	ND	ND
242	(-)-Citreoviridin	Test	10.47	7.36084	9.93464	10.471	9.62021	9.79481	13.0855	14.3596	18.7037	17.5552	20.4297	19.6527	26.7246	26.9177	23.5303	27.1182	55.8819	7.34915	10.1088	8.76642	10.3687	8.08515	19.3201	16.1543	19.4287	14.9266	13.5187	17.1873	15.219	17.2895		10.6819	7.36376	9.97636	10.5424	9.68149	9.88418	13.0853	14.5016	18.8683	17.697	20.545	19.8243	26.9827	27.2248	23.7148	27.5751
243	Ochratoxin A	Test	9.775	7.14319	9.56638	9.78084	8.94034	9.10291	12.2913	13.2921	17.6231	16.5428	19.3454	18.6379	24.9674	24.7843	21.2243	25.0185	52.9231	6.96556	9.50446	7.50819	9.81625	7.24517	17.6768	14.4783	17.7663	14.2621	12.8473	16.1441	14.1779	16.257		9.96086	7.1494	9.60118	9.84597	8.98999	9.18111	12.3085	13.4212	17.7747	16.6535	19.4643	18.7787	25.1738	25.0048	21.3785	25.292
244	Bromfenvinfos	Test	11.545	7.76578	10.4225	11.5511	10.6451	10.8782	14.2309	16.0227	20.3461	19.0664	21.9791	21.2201	29.3964	30.2303	27.1312	30.5946	59.5427	7.9004	11.0437	9.77895	11.3047	8.7307	21.9647	18.3413	22.1118	15.8287	14.4198	18.7546	16.7959	18.8153		11.7909	7.85028	10.4394	11.5869	10.6633	10.8985	14.2881	16.0618	20.3871	19.1133	22.0091	21.2774	29.4792	30.3534	27.095	30.7982
245	Toremifene	Test	10.83	7.48117	10.1077	10.8311	9.96737	10.156	13.4798	14.9155	19.2575	18.0639	20.9653	20.1732	27.6182	28.0232	24.7343	28.254	57.2051	7.53711	10.422	9.25937	10.67	8.40668	20.1923	16.9368	20.3129	15.2464	13.8398	17.7193	15.7525	17.8114		11.0549	7.5228	10.1559	10.9171	10.0436	10.255	13.517	15.0717	19.4301	18.2221	21.0931	20.358	27.9031	28.3769	24.951	28.7622
246	Difenoconazole	Test	11.95	7.95828	10.5882	11.9511	11.0157	11.2788	14.6336	16.637	20.9419	19.6234	22.5204	21.8103	30.3913	31.4581	28.4504	31.9131	60.7338	8.10041	11.3863	9.94554	11.6764	8.82036	22.964	19.1493	23.127	16.1188	14.7054	19.3119	17.3601	19.348		12.1928	8.03522	10.6	11.9931	11.033	11.288	14.7371	16.6617	20.9585	19.6491	22.5458	21.8369	30.4339	31.5403	28.3884	32.0167
247	Lincomycin	Calibrant	4.82	4.31833	5.2713	4.81938	4.55668	4.2512	6.15652	5.78948	6.68952	5.72683	8.19886	7.09665	7.50944	8.30382	6.32637	8.45322	13.5798	2.78572	5.03158	4.62229	5.33638	4.67519	7.25881	6.2307	7.47597	7.89588	6.41237	8.16983	6.46776	8.28235		4.90327	4.29843	5.3232	4.80093	4.57693	4.24396	6.19798	5.82906	6.77122	5.80723	8.27413	7.19395	7.59033	8.40933	6.3917	8.45225
248	Trifloxystrobin	Test	12.005	7.98933	10.613	12.0111	11.0712	11.3388	14.6937	16.7293	21.0308	19.7073	22.6011	21.8994	30.5413	31.6424	28.6472	32.1107	60.909	8.13053	11.4376	9.97487	11.7333	8.83638	23.1147	19.2807	23.2801	16.1602	14.7459	19.3943	17.4437	19.4262		12.2526	8.07307	10.6372	12.0864	11.1187	11.3789	14.8369	16.8017	21.0912	19.7743	22.6695	21.968	30.6574	31.8163	28.6892	32.2993
249	Nicosulfuron	Test	7.5	6.20026	8.18115	7.49996	6.83882	6.83512	9.48055	9.90537	13.6873	12.382	15.4265	14.4839	18.0195	17.3933	13.8386	17.3052	37.781	5.32249	7.47321	6.12102	8.04122	5.78234	12.5545	10.4	12.6333	11.6273	10.1671	12.5331	10.6286	12.6325		7.56883	6.21274	8.21048	7.55583	6.88265	6.91428	9.57446	9.9398	13.7221	12.4494	15.489	14.533	18.1194	17.4679	14.068	17.5843
250	Tris(3,5-dimethylphenyl) phosphate	Test	14.285	9.03097	11.9098	14.2898	13.2417	13.6	17.2206	20.2696	24.3495	22.8934	25.8489	25.205	36.2238	38.6067	35.7982	39.0133	67.7727	9.34369	13.3475	13.3207	14.0321	12.112	28.9734	28.7346	29.2221	17.3343	15.8447	22.2705	20.3875	22.0421		14.3993	9.16354	11.8865	14.2709	13.2438	13.6096	17.1191	20.2497	24.3356	22.897	25.81	25.1837	36.228	38.5938	35.8856	38.952
251	Cyflufenamid	Test	11.53	7.75684	10.4142	11.5311	10.6265	10.8582	14.2105	15.992	20.3162	19.0386	21.9517	21.1908	29.3468	30.1689	27.065	30.5288	59.4817	7.89041	11.0265	9.77034	11.2865	8.72586	21.9149	18.3028	22.0614	15.8136	14.4049	18.7264	16.7673	18.7882		11.7707	7.87006	10.4557	11.6278	10.7005	10.9374	14.3342	16.1218	20.4445	19.1669	22.0633	21.3332	29.5745	30.4724	27.2246	30.9206
252	Perfluorooctanoic acid	Test	10.47	7.36084	9.93464	10.471	9.62021	9.79481	13.0855	14.3596	18.7037	17.5552	20.4297	19.6527	26.7246	26.9177	23.5303	27.1182	55.8819	7.34915	10.1088	8.76642	10.3687	8.08515	19.3201	16.1543	19.4287	14.9266	13.5187	17.1873	15.219	17.2895		10.6819	7.36875	9.98289	10.5554	9.69425	9.8972	13.1002	14.5216	18.8881	17.7157	20.5645	19.8431	27.0153	27.2654	23.7582	27.617
253	Miconazole	Calibrant	12.665	8.35791	10.8998	12.6709	11.6838	11.9978	15.3588	17.7482	22.0042	20.635	23.4921	22.8847	32.2031	33.6729	30.7891	34.2598	62.8209	8.46668	11.9979	10.5484	12.3766	9.19834	24.7862	21.0452	24.978	16.5801	15.1524	20.2795	18.3443	20.2571		12.9006	8.25311	10.8584	12.6081	11.6122	11.9041	15.3677	17.6115	21.8555	20.5015	23.3806	22.731	31.9589	33.4096	30.4198	33.92
254	Cypermethrin (peak2)	Test	13.525	8.82166	11.3638	13.5305	12.5005	12.8517	16.2854	19.0892	23.2622	21.849	24.7076	24.1537	34.3732	36.3126	33.5	36.8947	65.3837	8.92353	12.719	12.0635	13.2502	10.4538	26.9963	24.5638	27.2207	17.0289	15.5734	21.3703	19.4607	21.2519		13.7143	8.71345	11.3844	13.5583	12.5661	12.9132	16.2881	19.1707	23.3229	21.9191	24.7768	24.2021	34.4952	36.4715	33.6891	36.9529
255	D-y-Tochopherol	Test	ND	ND	ND	ND	ND	ND	ND	ND	ND	ND	ND	ND	ND	ND	ND	ND	ND	ND	ND	ND	ND	ND	ND	ND	ND	ND	ND	ND	ND	ND		ND	ND	ND	ND	ND	ND	ND	ND	ND	ND	ND	ND	ND	ND	ND	ND
256	Fenvalerate	Test	13.615	8.86056	11.4214	13.6204	12.5875	12.9407	16.3894	19.2299	23.3927	21.975	24.8399	24.2829	34.5975	36.587	33.7773	37.1554	65.6608	8.97263	12.7939	12.2394	13.3429	10.6336	27.2293	25.0155	27.4569	17.0695	15.6104	21.4802	19.5735	21.35		13.7971	8.77628	11.4422	13.6461	12.6529	13.0036	16.3806	19.3106	23.4545	22.0467	24.9069	24.3322	34.7224	36.7465	33.9773	37.2176
257	Bifenthrin	Test	14.345	9.03337	11.9584	14.3497	13.3006	13.6587	17.3004	20.3615	24.4332	22.9733	25.9405	25.2832	36.3644	38.7848	35.9752	39.1734	67.965	9.37723	13.3968	13.3869	14.0934	12.2483	29.1302	29.088	29.3806	17.3549	15.8622	22.3389	20.4581	22.1008		14.4519	9.2011	11.972	14.3837	13.3458	13.7126	17.2682	20.4096	24.4845	23.0398	25.969	25.3237	36.4788	38.9084	36.2054	39.2388
258	HT-2 Toxin	Test	8.745	6.77995	8.94396	8.75047	7.92959	8.07355	11.0333	11.7222	15.95	14.8587	17.627	16.9802	22.1086	21.5259	17.8217	21.8366	47.1661	6.30541	8.59297	6.22324	9.02651	6.15572	15.3003	12.0768	15.3734	13.1501	11.7172	14.5382	12.5887	14.6508		8.87711	6.80691	8.98636	8.787	7.9823	8.13887	11.1401	11.8206	16.0491	14.9136	17.7589	17.0479	22.2142	21.6111	17.9599	21.815
259	Bromopropylate	Test	12.825	8.45063	10.976	12.8309	11.8337	12.1572	15.5239	17.9967	22.2392	20.8611	23.712	23.1236	32.6081	34.1653	31.3011	34.768	63.2876	8.54993	12.1328	10.7757	12.5367	9.35995	25.1948	21.5863	25.3929	16.672	15.24	20.488	18.5571	20.4499		13.0548	8.33961	10.9826	12.8664	11.8675	12.1761	15.6155	18.0314	22.2507	20.8812	23.7497	23.1285	32.6394	34.2341	31.3094	34.7495
260	6:2FTS	Test	ND	ND	ND	ND	ND	ND	ND	ND	ND	ND	ND	ND	ND	ND	ND	ND	ND	ND	ND	ND	ND	ND	ND	ND	ND	ND	ND	ND	ND	ND		ND	ND	ND	ND	ND	ND	ND	ND	ND	ND	ND	ND	ND	ND	ND	ND
261	Bicalutamide	Test	9.195	6.94895	9.22287	9.20064	8.36537	8.52256	11.5903	12.4015	16.6925	15.6271	18.3875	17.7358	23.4037	22.9635	19.2992	23.2707	49.8992	6.60907	8.99252	6.58175	9.36932	6.5481	16.3267	13.0508	16.4049	13.6529	12.2288	15.2462	13.2872	15.3607		9.35094	6.99414	9.27663	9.28207	8.44293	8.62096	11.6945	12.5609	16.8671	15.7535	18.5648	17.8846	23.6348	23.1971	19.5322	23.438
262	Tris(2,3-dichloro-2-propyl)phosphate	Test	11.32	7.66679	10.3254	11.3211	10.4306	10.6476	13.9956	15.6695	20.0009	18.7469	21.6622	20.8838	28.8275	29.5251	26.368	29.8398	58.8303	7.78535	10.8458	9.66664	11.0971	8.6651	21.3946	17.9023	21.533	15.6511	14.2437	18.4283	16.4663	18.5007		11.5574	7.74259	10.3511	11.3688	10.4644	10.6906	14.0394	15.7418	20.08	18.8269	21.7177	20.9802	28.971	29.7175	26.4029	30.1436
263	Ochratoxin C	Test	11.82	7.8929	10.5344	11.8211	10.8955	11.1487	14.5033	16.4373	20.7488	19.4421	22.3454	21.6178	30.067	31.0588	28.0229	31.4844	60.3516	8.0353	11.2752	9.88853	11.5541	8.78986	22.6381	18.8756	22.7959	16.0272	14.6155	19.1322	17.178	19.1769		12.0628	7.98625	10.5549	11.8788	10.9286	11.1777	14.6131	16.4918	20.7971	19.4973	22.3948	21.678	30.1629	31.2046	28.0226	31.6727
264	Tris(2-ethylhexyl) phosphate	Calibrant	15.86	8.15873	13.2621	15.8575	14.7214	15.12	19.6115	22.4993	26.3038	24.7435	28.1011	26.8995	39.4162	43.0113	40.1764	42.6498	72.666	10.2019	14.6178	13.2319	15.5529	14.9229	33.1023	37.3297	33.3761	17.7064	16.1213	23.9233	22.1031	23.3905		15.6942	8.10926	13.2866	15.8583	14.7155	15.0599	19.6443	22.5063	26.3459	24.7837	28.1419	26.9367	39.4595	43.0211	40.244	42.6969
265	Paxilline	Test	12.445	8.23102	10.8002	12.451	11.4787	11.7785	15.1351	17.4076	21.6806	20.3247	23.193	22.5557	31.6471	32.9958	30.0802	33.5509	62.1834	8.35345	11.8117	10.295	12.1588	9.02894	24.2264	20.3803	24.4095	16.4475	15.025	19.9888	18.0481	19.9863		12.6867	8.21713	10.8077	12.495	11.5027	11.7874	15.2565	17.4316	21.686	20.3393	23.2229	22.5609	31.6684	33.056	30.0369	33.562
266	Deflazacort	Test	9.89	7.17807	9.62832	9.89088	9.04959	9.21314	12.4211	13.4621	17.7971	16.7088	19.5229	18.8027	25.2534	25.1263	21.5912	25.3481	53.4378	7.0293	9.60116	7.71639	9.90246	7.38782	17.9361	14.7549	18.0283	14.3725	12.9591	16.3124	14.3453	16.4242		10.0762	7.16954	9.6449	9.92348	9.06683	9.25926	12.3933	13.5413	17.8984	16.7736	19.5871	18.8982	25.3806	25.2542	21.6374	25.5481
267	Tetracycline	Test	5.54	4.91732	6.45886	5.53941	5.28672	4.93317	7.08794	6.98425	8.85045	7.56705	10.6234	9.22516	10.345	10.6711	8.16715	11.3716	19.8511	3.47084	5.69219	4.8984	6.17008	5.09833	8.59608	8.02939	8.75703	8.94284	7.45573	9.33795	7.5664	9.43366		5.59124	4.87562	6.45939	5.49143	5.29134	5.01557	6.97337	7.01903	9.00926	7.78808	10.7012	9.45705	10.64	10.9423	8.46643	10.9689
268	Doxycycline	Test	7.07	5.96044	7.91592	7.0698	6.50745	6.41302	8.95531	9.29244	12.789	11.406	14.5841	13.4615	16.4369	15.9273	12.5242	15.831	34.0317	4.93939	7.08491	5.83862	7.67444	5.72827	11.6482	10.0595	11.7368	11.0653	9.59639	11.8344	9.9523	11.9293		7.12488	5.93399	7.81655	6.99408	6.42349	6.3675	8.80187	9.09949	12.5172	11.1916	14.3033	13.2036	16.0666	15.5815	12.3924	15.6625
269	Difenacoum (peak2)	Test	12.905	8.49665	11.0156	12.9108	11.909	12.2368	15.6075	18.1212	22.3565	20.9743	23.8229	23.2428	32.8107	34.4114	31.5559	35.0194	63.5224	8.59185	12.2001	10.902	12.6173	9.45351	25.3996	21.8761	25.6008	16.7165	15.2822	20.5913	18.6626	20.545		13.1314	8.38674	11.0455	12.9874	11.9893	12.3055	15.73	18.2313	22.4388	21.0627	23.9266	23.3178	32.9645	34.6265	31.7308	35.1415
270	PFHpS	Test	ND	ND	ND	ND	ND	ND	ND	ND	ND	ND	ND	ND	ND	ND	ND	ND	ND	ND	ND	ND	ND	ND	ND	ND	ND	ND	ND	ND	ND	ND		ND	ND	ND	ND	ND	ND	ND	ND	ND	ND	ND	ND	ND	ND	ND	ND
271	Tris(2-isopropylphenyl) phosphate	Test	14.36	9.03353	11.9665	14.3597	13.3104	13.6685	17.3138	20.3768	24.4471	22.9865	25.9557	25.2962	36.3877	38.8145	36.0046	39.1999	67.9971	9.38282	13.405	13.3974	14.1036	12.2709	29.1564	29.1471	29.407	17.3582	15.8651	22.3503	20.4699	22.1105		14.4606	9.2011	11.972	14.3837	13.3458	13.7126	17.2682	20.4096	24.4845	23.0398	25.969	25.3237	36.4788	38.9084	36.2054	39.2388
272	Dioxathion	Test	12.515	8.27116	10.8313	12.521	11.5438	11.8483	15.2059	17.5158	21.7836	20.4233	23.2878	22.6603	31.8238	33.2112	30.3064	33.7776	62.3858	8.38933	11.871	10.3681	12.2278	9.07657	24.4043	20.5825	24.5901	16.4905	15.0664	20.0818	18.1428	20.0732		12.755	8.24716	10.8499	12.5893	11.5939	11.8846	15.3494	17.5815	21.8273	20.4744	23.3543	22.7026	31.9104	33.3506	30.3561	33.8604
273	Fumagillin	Test	11.405	7.70453	10.3637	11.4111	10.5148	10.7379	14.0881	15.8078	20.1363	18.8719	21.7869	21.0151	29.0499	29.801	26.667	30.1346	59.1122	7.83042	10.9233	9.71457	11.1778	8.69372	21.6173	18.0737	21.7591	15.7215	14.3137	18.5565	16.5957	18.6245		11.649	7.80012	10.3983	11.4846	10.5703	10.801	14.172	15.9118	20.2434	18.9792	21.873	21.138	29.241	30.0556	26.7707	30.4918
274	Oxytetracycline	Test	5.615	4.97969	6.56954	5.61942	5.35969	5.00957	7.18812	7.11304	9.08345	7.77456	10.8752	9.46181	10.6686	10.9416	8.38071	11.6504	20.5835	3.54873	5.7654	4.92229	6.25761	5.14524	8.74869	8.19717	8.9043	9.05767	7.57076	9.46826	7.6897	9.56291		5.6692	4.96434	6.59094	5.60058	5.38191	5.11943	7.0934	7.17904	9.30246	8.05733	11.012	9.76048	11.0616	11.2925	8.75561	11.3204
275	PFECHS	Test	ND	ND	ND	ND	ND	ND	ND	ND	ND	ND	ND	ND	ND	ND	ND	ND	ND	ND	ND	ND	ND	ND	ND	ND	ND	ND	ND	ND	ND	ND		ND	ND	ND	ND	ND	ND	ND	ND	ND	ND	ND	ND	ND	ND	ND	ND
276	Perfluorononanoic acid	Test	11.165	7.60659	10.2606	11.1711	10.2898	10.4972	13.84	15.439	19.7745	18.5384	21.4524	20.6655	28.4573	29.0654	25.8689	29.3505	58.3504	7.70998	10.7164	9.57103	10.9642	8.60616	21.0248	17.6149	21.1576	15.5309	14.1242	18.2132	16.2494	18.2924		11.4043	7.68844	10.3059	11.26	10.3645	10.5866	13.9142	15.5817	19.9257	18.6833	21.5704	20.8317	28.7167	29.3985	26.0565	29.815
277	Fusariotoxin T-2	Test	9.55	7.06864	9.43327	9.55077	8.71169	8.87259	12.0163	12.9375	17.2568	16.1884	18.9695	18.2878	24.3594	24.066	20.4587	24.3306	51.7882	6.82849	9.30187	7.09496	9.63771	6.9521	17.1378	13.9007	17.2223	14.0259	12.6077	15.7902	13.8262	15.9044		9.71925	7.08547	9.45997	9.5988	8.74724	8.93363	12.0395	13.0411	17.3785	16.2648	19.0712	18.3923	24.5069	24.2107	20.5606	24.477
278	Halfenprox	Test	14.59	9.01739	12.159	14.5895	13.5356	13.8933	17.629	20.7257	24.7634	23.2874	26.3067	25.5875	36.9155	39.4918	36.6759	39.8033	68.7361	9.51149	13.5932	13.5895	14.337	12.7846	29.7586	30.5119	30.0151	17.4319	15.9265	22.6084	20.7367	22.3299		14.6599	9.22876	12.1741	14.6425	13.5771	13.9442	17.6283	20.7691	24.8176	23.3576	26.3318	25.6317	37.0344	39.6161	36.9192	39.8736
279	Chlorotetracycline	Test	6.585	5.66636	7.57885	6.58964	6.14753	5.94478	8.37388	8.59838	11.6815	10.2502	13.5292	12.2203	14.5804	14.2744	11.0995	14.4218	29.6424	4.49076	6.64976	5.42508	7.23903	5.61072	10.661	9.64324	10.7657	10.4183	8.94091	11.0516	9.19894	11.1432		6.63505	5.71697	7.53951	6.62443	6.14436	6.02921	8.31252	8.57933	11.7091	10.3713	13.4953	12.3196	14.7408	14.4114	11.379	14.4729
280	N-AP-FHxSA	Test	ND	ND	ND	ND	ND	ND	ND	ND	ND	ND	ND	ND	ND	ND	ND	ND	ND	ND	ND	ND	ND	ND	ND	ND	ND	ND	ND	ND	ND	ND		ND	ND	ND	ND	ND	ND	ND	ND	ND	ND	ND	ND	ND	ND	ND	ND
281	Vardenafil	Test	8.5	6.67746	8.78813	8.50037	7.69539	7.82473	10.7216	11.3507	15.5261	14.4057	17.2	16.5322	21.3516	20.7162	17.0092	20.9853	45.4958	6.12542	8.37015	6.16778	8.83526	6.00931	14.7385	11.6181	14.8103	12.8599	11.4217	14.1413	12.1985	14.2518		8.61413	6.69937	8.84672	8.5532	7.76929	7.91085	10.8661	11.4704	15.6466	14.4921	17.3646	16.6251	21.5063	20.8514	17.223	21.0383
282	Flufenoxuron	Test	13.15	8.63111	11.1411	13.1507	12.1363	12.4752	15.8628	18.4954	22.708	21.3137	24.1599	23.5987	33.4179	35.149	32.315	35.7615	64.2334	8.71882	12.4016	11.3234	12.8608	9.78519	26.0157	22.8243	26.2262	16.8443	15.4024	20.8974	18.9758	20.8251		13.3594	8.49935	11.1765	13.2223	12.2275	12.5578	15.9534	18.6211	22.8056	21.4176	24.275	23.6864	33.5997	35.3918	32.5479	35.8997
283	Glibenclamide	Test	10.61	7.4065	10.0034	10.6111	9.75594	9.93528	13.2405	14.576	18.9198	17.7541	20.6405	19.8553	27.0732	27.348	23.9987	27.5564	56.4118	7.42301	10.2308	8.97762	10.4846	8.22329	19.6581	16.4674	19.7713	15.0532	13.646	17.3953	15.4274	17.4939		10.8273	7.4211	10.0472	10.6859	9.82165	10.0273	13.2499	14.7216	19.0862	17.9013	20.7584	20.0312	27.3398	27.6709	24.1919	28.0347
284	Tris[4-(2-methyl-2-propanyl)phenyl] phosphate	Test	15.185	8.77883	12.6877	15.1887	14.1141	14.4761	18.5169	21.6033	25.5441	24.0258	27.201	26.2768	38.1972	41.2087	38.3751	41.2856	70.65	9.84461	14.0804	13.6703	14.9306	13.983	31.3352	33.9881	31.6035	17.5889	16.0484	23.2533	21.4054	22.8631		15.1629	8.91169	12.7041	15.2683	14.137	14.4964	18.5981	21.6279	25.5952	24.0903	27.2211	26.32	38.2974	41.3041	38.5898	41.3248
285	Cytochalasin E	Test	10.19	7.27212	9.7911	10.191	9.3462	9.51392	12.7692	13.9263	18.2683	17.1519	19.9985	19.2453	26.021	26.0551	22.5935	26.2552	54.7555	7.19785	9.8642	8.28349	10.1409	7.76738	18.6486	15.4959	18.7488	14.6651	13.2549	16.7676	14.7993	16.8754		10.3902	7.26282	9.82531	10.2516	9.3937	9.5913	12.7565	14.0514	18.4178	17.2716	20.1014	19.396	26.2419	26.3061	22.7398	26.6295
286	N-TAmP-FHxSA	Test	ND	ND	ND	ND	ND	ND	ND	ND	ND	ND	ND	ND	ND	ND	ND	ND	ND	ND	ND	ND	ND	ND	ND	ND	ND	ND	ND	ND	ND	ND		ND	ND	ND	ND	ND	ND	ND	ND	ND	ND	ND	ND	ND	ND	ND	ND
287	Perfluorooctanesulphonamide	Test	12.04	8.00505	10.6255	12.0411	11.0989	11.3688	14.7237	16.7754	21.0753	19.7492	22.6414	21.944	30.6164	31.7346	28.7455	32.2095	60.9964	8.14561	11.4632	9.99047	11.7618	8.84502	23.1902	19.3477	23.3568	16.1807	14.766	19.4354	17.4854	19.4652		12.2825	8.10615	10.6719	12.1723	11.1981	11.4632	14.9275	16.9317	21.2142	19.8906	22.7841	22.09	30.8653	32.0725	28.9681	32.5611
288	Perfluorooctanesulfonic acid	Test	11.12	7.58723	10.2386	11.1211	10.2427	10.447	13.7877	15.3621	19.6988	18.4688	21.3818	20.593	28.334	28.9121	25.7023	29.188	58.1873	7.68476	10.6732	9.53402	10.9203	8.58289	20.9019	17.518	21.0328	15.4902	14.0836	18.1411	16.1768	18.2224		11.3531	7.67498	10.2944	11.2329	10.3394	10.5606	13.8829	15.5417	19.887	18.6473	21.5334	20.7946	28.6531	29.3187	25.9698	29.7328
289	Deltamethrin	Test	13.51	8.81263	11.3513	13.5105	12.4812	12.8319	16.2625	19.058	23.2331	21.821	24.6783	24.1249	34.3232	36.2515	33.4382	36.8364	65.3224	8.91265	12.7024	12.0241	13.2296	10.4148	26.9445	24.4653	27.1682	17.0197	15.565	21.3458	19.4355	21.23		13.6958	8.7003	11.3723	13.5397	12.5475	12.8938	16.2688	19.1407	23.2947	21.8917	24.749	24.1742	34.4464	36.4126	33.6272	36.896
290	Verruculogen	Test	11.19	7.61443	10.2693	11.1911	10.3087	10.5172	13.8608	15.4698	19.8048	18.5662	21.4805	20.6946	28.5067	29.1267	25.9355	29.4155	58.4152	7.72005	10.7336	9.58508	10.9818	8.61493	21.074	17.6535	21.2075	15.5472	14.1404	18.2419	16.2784	18.3203		11.4247	7.67498	10.2944	11.2329	10.3394	10.5606	13.8829	15.5417	19.887	18.6473	21.5334	20.7946	28.6531	29.3187	25.9698	29.7328
291	Perfluorodecanoic acid	Test	11.74	7.854	10.5014	11.7411	10.8214	11.0686	14.4229	16.3144	20.6298	19.3306	22.2373	21.4996	29.8679	30.8132	27.7593	31.2206	60.1144	7.9953	11.2067	9.8561	11.4796	8.77265	22.4381	18.7134	22.5927	15.9695	14.5588	19.021	17.0653	19.0707		11.9825	7.98922	10.5575	11.8856	10.9348	11.1842	14.6205	16.5018	20.8066	19.5062	22.4037	21.6873	30.1789	31.2244	28.0441	31.6929
292	Brodifacoum (Peak1)	Test	13.46	8.78949	11.3203	13.4605	12.433	12.7825	16.2056	18.9798	23.1604	21.7508	24.6053	24.0525	34.1981	36.0988	33.2834	36.6899	65.1694	8.8855	12.6607	11.9253	13.1782	10.3189	26.8152	24.2224	27.0371	16.9965	15.5437	21.2843	19.3724	21.1749		13.6495	8.67442	11.3483	13.5025	12.5104	12.8551	16.2306	19.0808	23.2383	21.837	24.6936	24.1182	34.3489	36.2948	33.5033	36.782
293	Ceftiofur	Test	6.305	5.4812	7.34332	6.30956	5.93383	5.67322	8.03495	8.18325	10.9798	9.54969	12.8402	11.4528	13.4644	13.3073	10.2914	13.6759	27.0248	4.22165	6.39515	5.22066	6.97045	5.50438	10.0974	9.32953	10.2143	10.0322	8.55088	10.5944	8.76103	10.6852		6.35264	5.5969	7.39399	6.44109	6.01039	5.86663	8.07933	8.32926	11.3033	9.9675	13.0849	11.8797	14.0921	13.8498	10.899	13.9029
294	Penfluridol	Test	10.41	7.3416	9.90456	10.411	9.56177	9.73461	13.0185	14.2668	18.6107	17.4695	20.3384	19.5657	26.5746	26.7332	23.3295	26.9318	55.6483	7.31716	10.0565	8.66907	10.3194	8.02133	19.1757	16.0166	19.2825	14.8715	13.4632	17.0978	15.1294	17.2014		10.6195	7.36376	9.97636	10.5424	9.68149	9.88418	13.0853	14.5016	18.8683	17.697	20.545	19.8243	26.9827	27.2248	23.7148	27.5751
295	Indoxacarb	Test	11.95	7.95828	10.5882	11.9511	11.0157	11.2788	14.6336	16.637	20.9419	19.6234	22.5204	21.8103	30.3913	31.4581	28.4504	31.9131	60.7338	8.10041	11.3863	9.94554	11.6764	8.82036	22.964	19.1493	23.127	16.1188	14.7054	19.3119	17.3601	19.348		12.1928	8.06249	10.6266	12.0598	11.0942	11.3529	14.8086	16.7617	21.0533	19.7385	22.6342	21.9305	30.5935	31.7375	28.6033	32.2186
296	8:2FTS	Test	ND	ND	ND	ND	ND	ND	ND	ND	ND	ND	ND	ND	ND	ND	ND	ND	ND	ND	ND	ND	ND	ND	ND	ND	ND	ND	ND	ND	ND	ND		ND	ND	ND	ND	ND	ND	ND	ND	ND	ND	ND	ND	ND	ND	ND	ND
297	6:2ClPFAES	Test	ND	ND	ND	ND	ND	ND	ND	ND	ND	ND	ND	ND	ND	ND	ND	ND	ND	ND	ND	ND	ND	ND	ND	ND	ND	ND	ND	ND	ND	ND		ND	ND	ND	ND	ND	ND	ND	ND	ND	ND	ND	ND	ND	ND	ND	ND
298	Chlorfluazuron	Calibrant	13.44	8.78001	11.3081	13.4405	12.4137	12.7627	16.183	18.9485	23.1313	21.7227	24.5762	24.0235	34.148	36.0376	33.2213	36.6311	65.1084	8.87466	12.644	11.8858	13.1577	10.2813	26.7635	24.1266	26.9847	16.9871	15.535	21.2597	19.3471	21.1527		13.6309	8.6617	11.3365	13.484	12.4919	12.8357	16.2117	19.0508	23.21	21.8097	24.666	24.0902	34.3001	36.2359	33.4413	36.7249
299	Rugulosin	Test	10.86	7.4917	10.1215	10.8611	9.99603	10.1862	13.512	14.9618	19.3033	18.1059	21.009	20.2165	27.6923	28.1152	24.8345	28.3499	57.3098	7.55251	10.448	9.29282	10.6955	8.42834	20.2654	16.9988	20.387	15.2722	13.8657	17.7632	15.7967	17.8543		11.0858	7.51974	10.1529	10.9104	10.0373	10.2485	13.5093	15.0617	19.4203	18.213	21.0836	20.3487	27.8871	28.3568	24.9293	28.7415
300	Tetrabromobisphenol A	Test	12.305	8.15183	10.7394	12.311	11.3488	11.6387	14.9941	17.1913	21.4742	20.1277	23.0041	22.3464	31.2942	32.5649	29.6263	33.0952	61.7788	8.28206	11.693	10.1688	12.0219	8.94956	23.8715	20.0005	24.049	16.3592	14.9397	19.8016	17.8575	19.8108		12.5494	8.17103	10.7472	12.3545	11.3689	11.6448	15.1155	17.2116	21.4786	20.1416	23.0301	22.3534	31.3143	32.6235	29.5674	33.1228
301	PFNS	Test	ND	ND	ND	ND	ND	ND	ND	ND	ND	ND	ND	ND	ND	ND	ND	ND	ND	ND	ND	ND	ND	ND	ND	ND	ND	ND	ND	ND	ND	ND		ND	ND	ND	ND	ND	ND	ND	ND	ND	ND	ND	ND	ND	ND	ND	ND
302	Aliskiren	Test	9.345	7.00134	9.31404	9.3507	8.51333	8.6725	11.7739	12.6306	16.9355	15.8712	18.6382	17.9756	23.8182	23.4376	19.7952	23.7285	50.7334	6.7048	9.12525	6.77991	9.48398	6.71273	16.673	13.4083	16.7537	13.8148	12.3933	15.4801	13.5187	15.5947		9.50885	7.05515	9.3956	9.48721	8.63909	8.8229	11.9183	12.871	17.1989	16.0865	18.8932	18.2153	24.2021	23.853	20.1957	24.1103
303	Perfluoroundecanoic acid	Test	12.255	8.124	10.718	12.261	11.3025	11.5888	14.9439	17.1142	21.4005	20.0575	22.9369	22.2717	31.1684	32.4111	29.4637	32.9318	61.6342	8.25668	11.6505	10.1298	11.9733	8.92586	23.7451	19.8722	23.9205	16.327	14.9084	19.7342	17.789	19.7475		12.5002	8.1903	10.7718	12.4123	11.4236	11.7032	15.1739	17.3016	21.5635	20.2224	23.109	22.4382	31.4591	32.8005	29.7596	33.3027
304	Fumigacin	Test	11.655	7.81614	10.4683	11.6611	10.7473	10.9884	14.3423	16.1916	20.5105	19.2193	22.1289	21.3818	29.6692	30.5677	27.4951	30.9568	59.8752	7.95534	11.1381	9.8242	11.4056	8.75557	22.2385	18.5549	22.39	15.9109	14.501	18.9092	16.9522	18.9637		11.902	7.93743	10.5122	11.7706	10.8302	11.0738	14.4939	16.3318	20.6449	19.3544	22.252	21.5287	29.9083	30.8883	27.6778	31.348
305	N-CMAmP-6:2FOSA	Test	ND	ND	ND	ND	ND	ND	ND	ND	ND	ND	ND	ND	ND	ND	ND	ND	ND	ND	ND	ND	ND	ND	ND	ND	ND	ND	ND	ND	ND	ND		ND	ND	ND	ND	ND	ND	ND	ND	ND	ND	ND	ND	ND	ND	ND	ND
306	N-MeFOSAA	Test	ND	ND	ND	ND	ND	ND	ND	ND	ND	ND	ND	ND	ND	ND	ND	ND	ND	ND	ND	ND	ND	ND	ND	ND	ND	ND	ND	ND	ND	ND		ND	ND	ND	ND	ND	ND	ND	ND	ND	ND	ND	ND	ND	ND	ND	ND
307	2,2-Bis(chloromethyl)-1,3-propanediyl tetrakis(2-chloroethyl) bis(phosphate)	Test	10.215	7.28153	9.80687	10.221	9.37571	9.54401	12.8035	13.9727	18.3151	17.1955	20.0453	19.2892	26.0969	26.1477	22.6938	26.3468	54.8807	7.21432	9.89045	8.33828	10.1651	7.80361	18.7202	15.5683	18.8213	14.6936	13.2838	16.8128	14.8444	16.9201		10.4215	7.28557	9.86297	10.3224	9.46415	9.6629	12.836	14.1615	18.5285	17.3766	20.2107	19.5014	26.4244	26.5315	22.978	26.8614
308	N-EtFOSAA	Test	ND	ND	ND	ND	ND	ND	ND	ND	ND	ND	ND	ND	ND	ND	ND	ND	ND	ND	ND	ND	ND	ND	ND	ND	ND	ND	ND	ND	ND	ND		ND	ND	ND	ND	ND	ND	ND	ND	ND	ND	ND	ND	ND	ND	ND	ND
309	Destruxin B	Test	10.705	7.43993	10.0514	10.7111	9.85233	10.0356	13.3499	14.7304	19.0736	17.8953	20.7891	19.9998	27.3212	27.655	24.3331	27.8722	56.7781	7.47514	10.3178	9.11357	10.5684	8.31194	19.9005	16.6842	20.017	15.1419	13.7351	17.543	15.5755	17.6388		10.9309	7.44607	10.0757	10.745	9.87886	10.0859	13.318	14.8116	19.1749	17.9842	20.845	20.1154	27.4852	27.8529	24.3871	28.2222
310	FDSA	Test	ND	ND	ND	ND	ND	ND	ND	ND	ND	ND	ND	ND	ND	ND	ND	ND	ND	ND	ND	ND	ND	ND	ND	ND	ND	ND	ND	ND	ND	ND		ND	ND	ND	ND	ND	ND	ND	ND	ND	ND	ND	ND	ND	ND	ND	ND
311	PFDS	Test	ND	ND	ND	ND	ND	ND	ND	ND	ND	ND	ND	ND	ND	ND	ND	ND	ND	ND	ND	ND	ND	ND	ND	ND	ND	ND	ND	ND	ND	ND		ND	ND	ND	ND	ND	ND	ND	ND	ND	ND	ND	ND	ND	ND	ND	ND
312	Novobiocin	Test	11.695	7.83494	10.4849	11.7011	10.7844	11.0285	14.3826	16.253	20.5702	19.275	22.1832	21.4407	29.7685	30.6904	27.6272	31.0887	59.9951	7.97531	11.1724	9.84016	11.4425	8.76415	22.3382	18.6337	22.4913	15.9403	14.53	18.9652	17.0088	19.0173		11.9423	7.97729	10.5469	11.8586	10.9102	11.1582	14.5909	16.4618	20.7686	19.4705	22.3681	21.65	30.1152	31.1454	27.958	31.6119
313	Perfluorododecanoic acid	Test	12.695	8.37532	10.9138	12.7009	11.7118	12.0277	15.3896	17.7948	22.0483	20.6774	23.5332	22.9295	32.279	33.7652	30.8854	34.3556	62.9082	8.48223	12.0232	10.5883	12.4065	9.22609	24.8627	21.1429	25.0557	16.5977	15.1691	20.3188	18.3844	20.2935		12.9296	8.33082	10.9704	12.8421	11.8432	12.1502	15.5924	17.9914	22.2131	20.845	23.7144	23.0906	32.5744	34.1556	31.2249	34.6709
314	Tetrandrine	Test	5.875	5.17634	6.89798	5.87946	5.58665	5.25867	7.51029	7.52486	9.82369	8.44831	11.6605	10.2248	11.7242	11.8276	9.08653	12.4819	22.9927	3.80269	6.00306	5.00799	6.53501	5.29261	9.25012	8.68982	9.38962	9.42842	7.94282	9.89225	8.09185	9.98441		5.92448	5.27546	7.0048	5.99582	5.68631	5.47665	7.54118	7.72912	10.285	8.97892	12.0404	10.7906	12.5155	12.5084	9.76688	12.5452
315	Rafoxanide	Test	14.235	9.02712	11.8699	14.2399	13.1927	13.5509	17.1548	20.1928	24.2794	22.8265	25.7726	25.1391	36.1059	38.4578	35.6502	38.8793	67.6128	9.31576	13.3064	13.2609	13.9809	11.9982	28.8427	28.4416	29.09	17.3168	15.8297	22.2132	20.3284	21.9928		14.3553	9.16354	11.8865	14.2709	13.2438	13.6096	17.1191	20.2497	24.3356	22.897	25.81	25.1837	36.228	38.5938	35.8856	38.952
316	Dabigatran etexilate	Test	9.61	7.08835	9.46844	9.61079	8.77132	8.93266	12.0885	13.0299	17.3527	16.2818	19.0681	18.38	24.5194	24.2538	20.6582	24.5102	52.0921	6.86476	9.35477	7.1986	9.68408	7.02725	17.278	14.0508	17.3637	14.0882	12.671	15.8828	13.9181	15.9967		9.78232	7.12277	9.54221	9.74225	8.88764	9.07691	12.1954	13.2612	17.6087	16.4915	19.2996	18.6175	24.8953	24.6713	21.0338	24.9496
317	10:2FTS	Test	ND	ND	ND	ND	ND	ND	ND	ND	ND	ND	ND	ND	ND	ND	ND	ND	ND	ND	ND	ND	ND	ND	ND	ND	ND	ND	ND	ND	ND	ND		ND	ND	ND	ND	ND	ND	ND	ND	ND	ND	ND	ND	ND	ND	ND	ND
318	8:2ClPFAES	Test	ND	ND	ND	ND	ND	ND	ND	ND	ND	ND	ND	ND	ND	ND	ND	ND	ND	ND	ND	ND	ND	ND	ND	ND	ND	ND	ND	ND	ND	ND		ND	ND	ND	ND	ND	ND	ND	ND	ND	ND	ND	ND	ND	ND	ND	ND
319	Acarbose	Calibrant	1.38	1.33367	1.0297	1.38169	1.33945	1.16532	1.32726	1.46985	1.02258	0.767902	1.59138	1.24759	0.955588	1.23546	0.6	1.78576	1.69292	0.834683	1.84452	1.44385	0.655588	1.46731	1.82769	0.922431	2.52858	2.85651	1.58293	2.872	1.66121	3.33245		2.06114	1.32126	0.902714	1.36452	1.23477	1.37735	1.33579	1.38234	0.864016	0.661749	1.40845	1.11867	0.837912	1.21879	0.6	1.93229
320	Perfluorotridecanoic acid	Test	13.085	8.59819	11.1087	13.0907	12.0793	12.4157	15.7983	18.4017	22.6202	21.2289	24.075	23.5101	33.2662	34.9647	32.126	35.5778	64.0546	8.6869	12.3513	11.2129	12.7997	9.69521	25.8614	22.5761	26.0696	16.8132	15.3733	20.8214	18.898	20.7558		13.3027	8.49279	11.1695	13.2102	12.2153	12.5449	15.9418	18.6011	22.7868	21.3994	24.257	23.6675	33.5671	35.3526	32.5062	35.8611
321	Tralomethrin (peak3)	Test	13.96	8.97691	11.6563	13.9601	12.9184	13.2759	16.7979	19.7599	23.8824	22.4463	25.3475	24.7608	35.4342	37.6179	34.8129	38.1154	66.7229	9.15991	13.0757	12.8552	13.6933	11.364	28.1125	26.8373	28.3514	17.2121	15.7383	21.8873	19.9923	21.7096		14.1061	9.01221	11.6757	13.9836	12.9779	13.339	16.7611	19.8302	23.9428	22.519	25.4	24.8087	35.5609	37.7682	35.039	38.1869
322	Icariin	Test	8.79	6.79575	8.96892	8.79048	7.96767	8.11341	11.0831	11.782	16.017	14.9294	17.695	17.0498	22.2271	21.6547	17.9523	21.9688	47.4232	6.33344	8.62857	6.24068	9.05701	6.18388	15.3908	12.1561	15.4642	13.1958	11.7637	14.6015	12.651	14.7144		8.91921	6.86897	9.07341	8.93448	8.11791	8.2822	11.3083	12.0407	16.2966	15.1704	18.002	17.3043	22.6469	22.0856	18.4254	22.3002
323	Tris(2,3-dibromopropyl) phosphate	Test	11.805	7.88799	10.5303	11.8111	10.8862	11.1387	14.4933	16.4219	20.734	19.4281	22.3319	21.603	30.0421	31.0281	27.99	31.4514	60.3221	8.03029	11.2667	9.88441	11.5448	8.78767	22.6131	18.8551	22.7705	16.02	14.6084	19.1184	17.1639	19.1637		12.0528	7.98625	10.5549	11.8788	10.9286	11.1777	14.6131	16.4918	20.7971	19.4973	22.3948	21.678	30.1629	31.2046	28.0226	31.6727
324	PFDoS	Test	ND	ND	ND	ND	ND	ND	ND	ND	ND	ND	ND	ND	ND	ND	ND	ND	ND	ND	ND	ND	ND	ND	ND	ND	ND	ND	ND	ND	ND	ND		ND	ND	ND	ND	ND	ND	ND	ND	ND	ND	ND	ND	ND	ND	ND	ND
325	Perfluorotetradecanoic acid	Test	13.42	8.77042	11.296	13.4205	12.3945	12.7429	16.1605	18.9172	23.1022	21.6945	24.5472	23.9945	34.0978	35.9765	33.1592	36.5721	65.0475	8.86383	12.6274	11.8462	13.1371	10.2441	26.7118	24.0314	26.9323	16.9777	15.5263	21.235	19.3218	21.1305		13.6123	8.69161	11.3643	13.5273	12.5351	12.8809	16.256	19.1208	23.2759	21.8735	24.7305	24.1555	34.4139	36.3733	33.586	36.858
326	Ritonavir	Test	11.535	7.7613	10.4183	11.5411	10.6358	10.8682	14.2207	16.0074	20.3312	19.0525	21.9654	21.2054	29.3716	30.1996	27.0981	30.5617	59.5122	7.89541	11.0351	9.77466	11.2956	8.7283	21.9398	18.322	22.0866	15.8212	14.4124	18.7405	16.7816	18.8018		11.7808	7.88638	10.4692	11.6618	10.7314	10.9699	14.3725	16.1718	20.4923	19.2115	22.1084	21.3797	29.654	30.5715	27.3325	31.0225
327	Spinosyn A	Test	11.65	7.81148	10.4641	11.6511	10.738	10.9784	14.3322	16.1762	20.4956	19.2054	22.1153	21.367	29.6444	30.537	27.4621	30.9239	59.8452	7.95034	11.1296	9.82019	11.3964	8.7534	22.2136	18.5353	22.3646	15.9035	14.4937	18.8952	16.938	18.9502		11.8919	7.91852	10.4961	11.7298	10.7932	11.0349	14.4486	16.2718	20.5877	19.3008	22.1983	21.4728	29.8129	30.7696	27.5484	31.226
328	Erythromycin	Test	8.425	6.6476	8.74467	8.43034	7.63109	7.75514	10.6343	11.2475	15.4055	14.2752	17.0798	16.4027	21.1345	20.488	16.7829	20.7393	45.0088	6.07353	8.30766	6.16566	8.78142	5.97703	14.5823	11.5015	14.6539	12.7773	11.3376	14.0297	12.089	14.1396		8.54057	6.68336	8.82666	8.51996	7.73915	7.87827	10.8263	11.4204	15.5881	14.4305	17.3075	16.5631	21.4032	20.7424	17.1181	20.9269
329	Clarithromycin	Test	9.51	7.05539	9.40967	9.51075	8.67195	8.83256	11.968	12.876	17.1928	16.1257	18.9035	18.226	24.2521	23.9406	20.3258	24.2107	51.5824	6.8041	9.26658	7.02796	9.60687	6.90274	17.0446	13.8012	17.1283	13.9841	12.5653	15.7283	13.7648	15.8427		9.67719	7.09065	9.47126	9.61842	8.76636	8.95317	12.0608	13.0711	17.41	16.296	19.1025	18.4233	24.5603	24.2736	20.6251	24.5416
330	Azithromycin	Test	6.555	5.64701	7.5553	6.55963	6.12491	5.91562	8.3376	8.55434	11.6083	10.176	13.4582	12.1394	14.4618	14.1708	11.012	14.3405	29.3633	4.46214	6.62251	5.40091	7.21079	5.60068	10.6002	9.61284	10.7061	10.3772	8.89937	11.0026	9.15195	11.0941		6.60466	5.75772	7.5898	6.68965	6.19257	6.08775	8.39708	8.66935	11.8525	10.5153	13.6395	12.4757	14.9727	14.6138	11.553	14.6785
331	Narasin	Test	15.08	8.84497	12.5896	15.0788	14.0097	14.3697	18.3471	21.4468	25.4069	23.8963	27.0412	26.1589	37.9741	40.9002	38.0694	41.0269	70.3033	9.78411	13.9915	13.6969	14.8238	13.7844	31.0457	33.3729	31.3122	17.5639	16.0301	23.1382	21.2858	22.7697		15.0726	9.03444	12.5759	15.1242	14.006	14.3681	18.3626	21.4282	25.4174	23.9239	27.0122	26.1667	38.0133	40.9121	38.2059	40.9962
332	PFHxDA	Test	ND	ND	ND	ND	ND	ND	ND	ND	ND	ND	ND	ND	ND	ND	ND	ND	ND	ND	ND	ND	ND	ND	ND	ND	ND	ND	ND	ND	ND	ND		ND	ND	ND	ND	ND	ND	ND	ND	ND	ND	ND	ND	ND	ND	ND	ND
333	Glycyrrhizic acid	Test	10.465	7.36084	9.93464	10.471	9.62021	9.79481	13.0855	14.3596	18.7037	17.5552	20.4297	19.6527	26.7246	26.9177	23.5303	27.1182	55.8819	7.34915	10.1088	8.76642	10.3687	8.08515	19.3201	16.1543	19.4287	14.9266	13.5187	17.1873	15.219	17.2895		10.6819	7.38657	10.0056	10.6009	9.73888	9.94274	13.1523	14.5916	18.9576	17.7808	20.6326	19.9091	27.1291	27.4075	23.91	27.7633
334	Roxithromycin	Test	9.595	7.08508	9.4626	9.60078	8.76138	8.92264	12.0765	13.0145	17.3368	16.2663	19.0517	18.3647	24.4928	24.2226	20.6249	24.4803	52.0418	6.85875	9.34596	7.18109	9.67635	7.01464	17.2546	14.0257	17.3401	14.0779	12.6605	15.8673	13.9028	15.9814		9.77181	7.11105	9.51618	9.69672	8.84292	9.03132	12.1459	13.1912	17.5357	16.4198	19.2272	18.5463	24.7725	24.525	20.8831	24.7995
335	Spiramycin	Test	6.185	5.39865	7.23026	6.18953	5.8398	5.55722	7.88925	8.00224	10.6665	9.24487	12.5262	11.1154	12.981	12.8933	9.95061	13.3562	25.8981	4.1052	6.28585	5.14928	6.8518	5.45057	9.85874	9.17189	9.98142	9.86498	8.38221	10.3984	8.57383	10.4893		6.23245	5.58184	7.37592	6.41892	5.99429	5.84713	8.05159	8.29925	11.2538	9.91867	13.0347	11.8263	14.0138	13.7825	10.8417	13.8347
336	Tilmicosin	Test	7.08	5.96627	7.92234	7.0798	6.515	6.42281	8.96747	9.30674	12.8108	11.4294	14.6047	13.4862	16.4746	15.9616	12.5544	15.863	34.1212	4.94852	7.09396	5.84688	7.6832	5.72994	11.669	10.0674	11.7573	11.0786	9.60985	11.8507	9.96802	11.9457		7.13516	6.09056	8.03407	7.29957	6.66764	6.66038	9.22046	9.54965	13.1776	11.8766	14.9555	13.9316	17.1816	16.5935	13.2844	16.6929
337	PFOcDA	Test	ND	ND	ND	ND	ND	ND	ND	ND	ND	ND	ND	ND	ND	ND	ND	ND	ND	ND	ND	ND	ND	ND	ND	ND	ND	ND	ND	ND	ND	ND		ND	ND	ND	ND	ND	ND	ND	ND	ND	ND	ND	ND	ND	ND	ND	ND
338	Tylosin	Test	8.31	6.59519	8.67048	8.31029	7.5223	7.63596	10.4845	11.0715	15.1966	14.0478	16.873	16.1762	20.7567	20.0952	16.3963	20.3101	44.1543	5.98304	8.20042	6.17096	8.68871	5.92974	14.3156	11.3138	14.3872	12.6343	11.192	13.838	11.9011	13.9468		8.41456	6.67371	8.81461	8.50003	7.7211	7.85873	10.8023	11.3904	15.5529	14.3934	17.2731	16.5257	21.3411	20.6769	17.0553	20.86
339	Tris(1,1,3-tribromo-2,2-dimethylpropyl) phosphate	Test	14.34	9.03314	11.9502	14.3398	13.2907	13.6489	17.287	20.3462	24.4193	22.96	25.9252	25.2702	36.341	38.7552	35.9457	39.1468	67.9329	9.37164	13.3885	13.3763	14.0832	12.2256	29.1041	29.029	29.3541	17.3515	15.8593	22.3275	20.4464	22.091		14.4431	9.2011	11.972	14.3837	13.3458	13.7126	17.2682	20.4096	24.4845	23.0398	25.969	25.3237	36.4788	38.9084	36.2054	39.2388
340	Valinomycin	Test	15.13	8.81618	12.6342	15.1288	14.0572	14.4181	18.4239	21.5182	25.4696	23.9555	27.1141	26.213	38.0762	41.0408	38.2087	41.1454	70.4613	9.81166	14.032	13.6868	14.8725	13.876	31.1773	33.6543	31.4446	17.5755	16.0386	23.1907	21.3404	22.8124		15.1138	8.91169	12.7041	15.2683	14.137	14.4964	18.5981	21.6279	25.5952	24.0903	27.2211	26.32	38.2974	41.3041	38.5898	41.3248
341	Vitamin B12	Test	ND	ND	ND	ND	ND	ND	ND	ND	ND	ND	ND	ND	ND	ND	ND	ND	ND	ND	ND	ND	ND	ND	ND	ND	ND	ND	ND	ND	ND	ND		ND	ND	ND	ND	ND	ND	ND	ND	ND	ND	ND	ND	ND	ND	ND	ND
342	Vancomycin	Calibrant	4.28	3.83082	4.22632	4.27945	3.9317	3.74687	5.41599	4.87696	5.08557	4.42998	6.32688	5.57041	5.55786	6.64698	5.04851	6.26748	9.44678	2.30677	4.53429	4.25299	4.65977	4.36352	6.29964	4.69454	6.56888	7.09914	5.6256	7.30187	5.65947	7.43701		4.40515	3.97433	4.45326	4.43203	4.06053	3.73916	5.68912	5.04924	5.31696	4.57366	6.64874	5.7609	5.75087	6.84369	5.10966	6.92801
343	Iodixanol	Test	4.54	4.06894	4.7377	4.5394	4.23911	3.98889	5.77726	5.3154	5.84774	5.04132	7.22126	6.29207	6.47197	7.42882	5.65227	7.27016	11.361	2.53237	4.77391	4.45085	4.99068	4.51515	6.7567	5.43911	6.99979	7.48364	6.00444	7.7187	6.04676	7.84177		4.64294	4.12864	4.87507	4.60495	4.31065	3.97852	5.94174	5.41913	5.99984	5.14905	7.41643	6.43134	6.60184	7.57507	5.70975	7.63626
[truncated: 15 more columns]

## Sheet: Table S5
Input CM: CM 22; reference-input CM: CM 24; R2 =0.997 (calibrants, between input and reference-input CMs).
Output CM	R2				Mean error		Median error		Mean error %		Median error %
	before projection	before projection	before calibration	after calibration	before calibration	after calibration	before calibration	after calibration	before calibration	after calibration	before calibration	after calibration
	Calibrants	All molecules	All molecules
CM 01	0.8039	0.804758	0.926728	0.989291	0.342555	0.136739	0.277986	0.106821	5.56462	2.30646	4.39011	1.75882
CM 02	0.829377	0.800674	0.942667	0.991841	0.402455	0.14351	0.267983	0.0755959	5.12629	2.32288	3.33617	0.800491
CM 03	0.924644	0.914258	0.943498	0.986693	0.609316	0.208594	0.486692	0.118277	7.21592	2.39029	5.29193	1.20763
CM 04	0.928891	0.917087	0.942791	0.986579	0.549234	0.194421	0.435452	0.108183	6.89915	2.4092	5.49812	1.22562
CM 05	0.909685	0.912204	0.935356	0.986496	0.622388	0.196464	0.485102	0.106556	7.74513	2.44592	6.17638	1.18952
CM 06	0.910607	0.894342	0.933906	0.98726	0.795371	0.258448	0.614767	0.148871	7.71253	2.41093	5.7086	1.29692
CM 07	0.929252	0.917294	0.943899	0.986658	0.900629	0.30072	0.729588	0.155265	7.68729	2.68293	5.89174	1.20098
CM 08	0.883785	0.85166	0.935966	0.991652	1.1292	0.321257	0.857536	0.148874	9.01365	4.27844	5.17291	0.914475
CM 09	0.883842	0.846437	0.927838	0.987541	1.14826	0.491443	0.847959	0.366676	11.069	3.86303	5.59281	2.65477
CM 10	0.874247	0.844455	0.941121	0.992133	1.09422	0.312903	0.829066	0.141119	7.26714	2.86025	4.61107	0.707865
CM 11	0.861572	0.835765	0.92867	0.992145	1.2112	0.315058	0.873676	0.142074	9.29572	3.05675	5.34542	0.841282
CM 12	0.898609	0.866028	0.931729	0.987303	1.86317	0.789422	1.38865	0.603527	11.5989	4.46078	6.09803	2.61898
CM 13	0.921826	0.900852	0.930712	0.987037	2.09729	0.565077	1.57001	0.227283	11.3248	3.1108	7.50157	1.11612
CM 14	0.928651	0.910031	0.925632	0.985713	2.11346	0.548487	1.60803	0.210661	14.1197	3.25126	8.9893	1.11232
CM 15	0.917693	0.899514	0.932026	0.987166	2.09925	0.564642	1.69197	0.230835	10.9841	3.81371	7.70195	1.05636
CM 16	0.847756	0.78968	0.918226	0.993475	3.72378	0.897442	2.25799	0.432733	12.8367	4.42674	5.37033	0.927004
CM 17	0.911128	0.862835	0.95431	0.992353	0.356771	0.121915	0.250271	0.0611297	6.83683	2.51466	4.17398	1.04797
CM 18	0.945673	0.916272	0.952132	0.986981	0.521297	0.198673	0.440526	0.117993	6.602	2.32527	5.00379	1.27639
CM 19	0.954198	0.958755	0.958353	0.984068	0.357034	0.188964	0.219139	0.105671	5.4171	2.37381	3.02453	1.26836
CM 20	0.959109	0.97192	0.996652	0.987435	0.0919032	0.204594	0.049979	0.0985444	1.17339	2.52026	0.534164	1.0488
CM 21	0.968984	0.98898	0.988309	0.975	0.370447	0.434127	0.0946562	0.125207	3.82912	4.69523	1.46063	1.99869
CM 23	0.977311	0.974164	0.953148	0.977303	0.858573	0.590386	0.393763	0.220975	5.89658	3.80135	3.36741	1.71871
CM 25	0.680772	0.685212	0.778718	0.990241	1.3363	0.199296	1.12738	0.102451	15.4686	1.80529	7.83005	0.777471
CM 26	0.682178	0.688335	0.783842	0.990267	1.30069	0.198971	1.00273	0.102652	19.9678	2.15933	7.91316	0.812622
CM 27	0.788846	0.791324	0.831927	0.987488	1.53032	0.282308	1.1097	0.143206	15.0861	2.0939	6.96222	0.871531
CM 28	0.801205	0.801605	0.833888	0.987081	1.46255	0.276826	1.02956	0.136906	18.82	2.46781	7.3374	0.927231
CM 29	0.781631	0.798993	0.842203	0.987766	1.481	0.26685	1.076	0.128841	13.4646	1.93551	7.08859	0.818449
CM 30	0.794119	0.811457	0.828158	0.986009	0.971933	0.186947	0.60745	0.0867238	13.8022	2.17293	6.53624	0.911718
Raw data from experimental-experimental projections (input CM 22, reference-input CM 24).
Number	Compound Name	Group	CM 22	CM 01	CM 02	CM 03	CM 04	CM 05	CM 06	CM 07	CM 08	CM 09	CM 10	CM 11	CM 12	CM 13	CM 14	CM 15	CM 16	CM 17	CM 18	CM 19	CM 20	CM 21	CM 22	CM 23	CM 24	CM 25	CM 26	CM 27	CM 28	CM 29	CM 30	CM 01	CM 02	CM 03	CM 04	CM 05	CM 06	CM 07	CM 08	CM 09	CM 10	CM 11	CM 12	CM 13	CM 14	CM 15	CM 16
			Experimental RT (min)	Projected RT (min)																														rpRT (min), using CM 24 as reference-input CM
1	4-Amino-1,2,4-triazole	Test	ND	ND	ND	ND	ND	ND	ND	ND	ND	ND	ND	ND	ND	ND	ND	ND	ND	ND	ND	ND	ND	ND	-	ND	ND	ND	ND	ND	ND	ND	ND	ND	ND	ND	ND	ND	ND	ND	ND	ND	ND	ND	ND	ND	ND	ND	ND
2	Moniliformin	Calibrant	1.62	1.84332	1.19246	1.96429	1.7369	1.6332	2.27351	1.75289	0.965427	0.811696	1.61338	1.36349	0.773844	1.12622	0.6	1.64586	1.17792	0.99492	2.2079	2.198	1.01854	1.7339	-	0.815532	2.5156	4.07558	2.70972	4.08713	2.64162	4.45834	2.64527	1.714	1.12212	1.99423	1.8118	1.69437	2.33817	1.79243	0.827869	0.576251	1.46367	1.23431	0.6	1.05798	0.6	1.45009	0.6
3	3-Amino-2-oxazolidinone	Test	ND	ND	ND	ND	ND	ND	ND	ND	ND	ND	ND	ND	ND	ND	ND	ND	ND	ND	ND	ND	ND	ND	-	ND	ND	ND	ND	ND	ND	ND	ND	ND	ND	ND	ND	ND	ND	ND	ND	ND	ND	ND	ND	ND	ND	ND	ND
4	1H-benzotriazole	Test	8.49	4.71595	5.91768	5.45882	5.02898	4.90691	6.87909	6.8075	8.30543	7.29297	9.84584	8.86485	9.94015	10.7502	8.34242	10.8389	19.0402	3.23076	5.59559	4.72359	5.77943	4.73382	-	6.78325	8.4954	8.77163	7.31296	9.27224	7.54442	9.42303	5.62426	4.79321	5.98716	5.46767	5.02954	4.91627	6.88158	6.83373	8.49039	7.53929	10.0318	9.06661	10.4866	10.8982	8.50678	11.0435	19.9487
5	Nicotinic Acid	Test	1.96	1.9941	1.41702	2.13565	1.9006	1.79149	2.50537	1.9951	1.23254	1.0236	1.93002	1.62039	1.02305	1.55167	0.6	2.03088	1.40578	1.02463	2.37905	2.32197	1.35356	2.18504	-	1.03346	2.77801	4.30356	2.93012	4.33375	2.87285	4.68994	2.78249	1.83842	1.30655	2.12806	1.93629	1.81666	2.51614	1.98397	1.07831	0.83103	1.74571	1.47831	0.6	1.41583	0.6	1.79031	0.912744
6	Melamine	Test	1.27	1.6879	0.965562	1.78836	1.56854	1.47096	2.03477	1.50491	0.704521	0.608444	1.30174	1.11541	0.6	0.695264	0.6	1.25875	1.01995	0.973829	2.03156	2.07057	0.665722	1.27177	-	0.602729	2.24957	3.84241	2.48469	3.83502	2.40545	4.22219	2.50546	1.44133	0.723718	1.69994	1.53786	1.42603	1.94605	1.37206	0.295578	0.6	0.864963	0.720778	0.6	0.6	0.6	0.711362	0.6
7	Metformin	Test	1.27	1.6879	0.965562	1.78836	1.56854	1.47096	2.03477	1.50491	0.704521	0.608444	1.30174	1.11541	0.6	0.695264	0.6	1.25875	1.01995	0.973829	2.03156	2.07057	0.665722	1.27177	-	0.602729	2.24957	3.84241	2.48469	3.83502	2.40545	4.22219	2.50546	1.46604	0.759478	1.72668	1.56276	1.45039	1.98173	1.41021	0.342874	0.6	0.918109	0.766105	0.6	0.6	0.6	0.777951	0.6
8	1,3-Benzothiazol	Test	12.46	6.06117	8.09354	7.43272	6.85799	6.79331	9.37502	9.74986	13.1277	11.9088	14.9077	13.9221	17.3012	16.8658	13.8537	16.9955	36.1975	5.31748	7.43044	6.18492	8.05673	5.81744	-	10.7808	12.4655	11.315	9.8518	12.2825	10.4328	12.3644	7.44874	6.27538	8.33771	7.64925	7.04232	6.98772	9.64622	10.0688	13.5812	12.0552	15.4449	14.394	17.5631	17.5605	14.4841	17.7265	37.8627
9	Trimethyl phosphate	Test	6.05	3.75449	4.27557	4.21747	3.8693	3.73362	5.27149	4.98644	5.34254	4.56309	6.61248	5.77115	5.82841	7.12434	5.17654	7.27898	9.85296	2.08878	4.41496	3.82334	4.45059	4.36228	-	4.37592	6.22036	7.10821	5.66841	7.39944	5.7635	7.61034	4.52545	3.83998	4.4375	4.32013	3.96902	3.84111	5.39852	5.15267	5.76947	5.17739	7.02104	6.22812	6.8903	7.52926	5.56504	7.71154	11.4767
10	Hexamethylenetetramine	Test	ND	ND	ND	ND	ND	ND	ND	ND	ND	ND	ND	ND	ND	ND	ND	ND	ND	ND	ND	ND	ND	ND	-	ND	ND	ND	ND	ND	ND	ND	ND	ND	ND	ND	ND	ND	ND	ND	ND	ND	ND	ND	ND	ND	ND	ND	ND
11	(±)-Methamidophos	Calibrant	2.95	2.43095	2.09	2.63679	2.37775	2.25585	3.17967	2.70717	2.08376	1.71947	2.92573	2.45442	1.88765	2.82694	1.53435	3.20054	2.49293	1.16369	2.87626	2.68382	2.27007	3.35707	-	1.72763	3.56384	4.97432	3.58061	5.06062	3.55549	5.37579	3.18954	2.70388	2.62793	3.05927	2.80117	2.6718	3.74821	3.32297	2.95092	2.64156	3.85694	3.34064	3.11201	3.95682	2.50089	4.22823	4.32429
12	Patulin	Test	5.85	3.67202	4.13524	4.11535	3.77348	3.63758	5.1379	4.83778	5.1107	4.35419	6.35523	5.53116	5.52428	6.83518	4.92754	6.99912	9.21231	2.00869	4.3168	3.74962	4.33612	4.36476	-	4.18784	6.04062	6.97035	5.53275	7.24657	5.61864	7.46317	4.43691	3.79385	4.36292	4.26725	3.9201	3.79181	5.32973	5.07556	5.64654	5.06953	6.88379	6.10076	6.72781	7.3766	5.43295	7.56153	11.1253
13	L-carnitime	Test	1.21	1.66124	0.927131	1.75825	1.5397	1.44322	1.99384	1.46255	0.661251	0.6	1.24981	1.07458	0.6	0.622111	0.6	1.19335	1.00059	0.971171	2.00131	2.04875	0.604582	1.1941	-	0.6	2.20438	3.80261	2.44632	3.79198	2.36516	4.18195	2.48164	1.43146	0.709442	1.68924	1.52789	1.4163	1.93178	1.35681	0.276723	0.6	0.843779	0.702724	0.6	0.6	0.6	0.684759	0.6
14	Recinine	Test	6.96	4.1232	4.90561	4.68167	4.304	4.17112	5.87616	5.66447	6.42338	5.54685	7.80331	6.89489	7.28287	8.45694	6.33085	8.57704	13.0087	2.48246	4.8591	4.15897	4.95087	4.40316	-	5.25288	7.05156	7.73346	6.28495	8.09685	6.42534	8.28334	4.93156	4.10792	4.87188	4.63138	4.25685	4.13172	5.8026	5.60717	6.49877	5.81429	7.83343	6.98563	7.85293	8.43256	6.34877	8.60094	13.6236
15	Pyridoxine	Test	1.96	1.9941	1.41702	2.13565	1.9006	1.79149	2.50537	1.9951	1.23254	1.0236	1.93002	1.62039	1.02305	1.55167	0.6	2.03088	1.40578	1.02463	2.37905	2.32197	1.35356	2.18504	-	1.03346	2.77801	4.30356	2.93012	4.33375	2.87285	4.68994	2.78249	1.85337	1.3288	2.14412	1.95123	1.83134	2.53748	2.00697	1.1087	0.861706	1.77995	1.50802	0.6	1.4589	0.6	1.83131	0.957068
16	Pencillic acid	Test	9.38	5.0431	6.46884	5.90778	5.44638	5.33381	7.45321	7.47204	9.41453	8.33841	11.032	10.0298	11.5693	12.1074	9.54728	12.1916	22.8326	3.69808	6.01725	5.05193	6.28288	4.99378	-	7.68961	9.35966	9.36404	7.90186	9.95469	8.19635	10.0874	6.03135	5.14074	6.55121	5.92179	5.44877	5.34452	7.46321	7.50297	9.57734	8.48111	11.216	10.2066	11.9407	12.2591	9.70998	12.3999	23.6265
17	Metronidazole	Test	5.93	3.70507	4.19144	4.1562	3.81182	3.67599	5.19136	4.89722	5.20316	4.43741	6.4579	5.62682	5.64522	6.95067	5.02693	7.11082	9.46614	2.04043	4.35609	3.77911	4.38218	4.36356	-	4.26285	6.11239	7.02551	5.58702	7.30769	5.67656	7.522	4.47229	3.78923	4.35545	4.26196	3.91521	3.78688	5.32285	5.06785	5.63426	5.05875	6.87007	6.08805	6.71157	7.36134	5.41975	7.54655	11.0903
18	Triethyl phosphate	Calibrant	11.04	5.61478	7.40349	6.73617	6.21425	6.12487	8.50259	8.70568	11.457	10.2902	13.1826	12.1748	14.6738	14.6664	11.8474	14.765	30.1107	4.58622	6.78844	5.66344	7.25654	5.43232	-	9.37537	11.0136	10.4375	8.97287	11.2182	9.40774	11.3216	6.79496	5.72982	7.49459	6.75954	6.22173	6.13864	8.52792	8.74337	11.5585	10.2198	13.3385	12.2841	14.655	14.807	11.9866	14.9525	30.5972
19	Acephate	Calibrant	4.32	3.02643	3.05187	3.33416	3.03813	2.90544	4.10894	3.70681	3.42596	2.86325	4.46436	3.8028	3.41283	4.67413	3.08402	4.9307	5.03458	1.48471	3.56038	3.18644	3.35792	4.24018	-	2.82002	4.70271	5.91442	4.49713	6.08468	4.52012	6.34947	3.76957	3.30828	3.58262	3.72071	3.41421	3.2836	4.61657	4.28048	4.39721	3.96178	5.48441	4.81285	5.06801	5.81296	4.08591	6.03079	7.74256
20	Sulfamylon	Test	ND	ND	ND	ND	ND	ND	ND	ND	ND	ND	ND	ND	ND	ND	ND	ND	ND	ND	ND	ND	ND	ND	-	ND	ND	ND	ND	ND	ND	ND	ND	ND	ND	ND	ND	ND	ND	ND	ND	ND	ND	ND	ND	ND	ND	ND	ND
21	Molinate	Test	19.09	7.59691	9.99682	10.4592	9.6454	9.73024	13.0585	14.3457	19.0992	17.8189	20.7594	19.9765	27.2066	26.728	23.2041	27.0878	56.0484	7.55913	10.1606	8.57955	10.6176	8.0207	-	16.462	19.496	14.7212	13.2836	16.8621	14.9019	16.8571	10.3948	7.5631	10.0171	10.7785	9.9332	10.0212	13.459	14.7954	19.4213	18.1476	21.0147	20.2677	27.5777	27.5234	23.9115	27.8208	56.584
22	Atrazine-desethyl	Test	10.12	5.30435	6.90153	6.27869	5.79053	5.68747	7.92466	8.02324	10.3326	9.21174	12.0041	10.9945	12.949	13.2449	10.5652	13.3321	26.0671	4.09435	6.36361	5.32471	6.71474	5.19774	-	8.44406	10.0906	9.84819	8.38429	10.5199	8.73751	10.6389	6.37131	5.4153	6.99366	6.29988	5.79767	5.70227	7.94509	8.06186	10.4774	9.26613	12.1867	11.151	13.1614	13.4032	10.7283	13.5442	26.7599
23	Isoprocarb	Test	15.98	6.98847	9.34793	9.09359	8.3884	8.39863	11.4185	12.2616	16.7217	15.446	18.498	17.6191	23.1782	22.2392	18.8722	22.4887	48.8852	6.78668	8.93977	7.46663	9.57752	6.98674	-	13.9825	16.1682	13.2816	11.8308	14.8124	12.8886	14.8482	9.04629	7.05961	9.43506	9.28531	8.55199	8.56441	11.6654	12.5273	16.9211	15.3423	18.739	17.8105	22.8892	22.728	19.288	22.9591	49.3581
24	Bisphenol F	Test	ND	ND	ND	ND	ND	ND	ND	ND	ND	ND	ND	ND	ND	ND	ND	ND	ND	ND	ND	ND	ND	ND	-	ND	ND	ND	ND	ND	ND	ND	ND	ND	ND	ND	ND	ND	ND	ND	ND	ND	ND	ND	ND	ND	ND	ND	ND
25	3-Amino-5-morpholinomethyl-2-oxazolidinone	Test	ND	ND	ND	ND	ND	ND	ND	ND	ND	ND	ND	ND	ND	ND	ND	ND	ND	ND	ND	ND	ND	ND	-	ND	ND	ND	ND	ND	ND	ND	ND	ND	ND	ND	ND	ND	ND	ND	ND	ND	ND	ND	ND	ND	ND	ND	ND
26	Thiabendazole	Calibrant	7.46	4.32087	5.24399	4.93622	4.54183	4.41167	6.20595	6.0378	7.03181	6.10711	8.46781	7.53031	8.12583	9.19983	6.97907	9.30614	14.8926	2.71679	5.10128	4.34347	5.21932	4.4788	-	5.74693	7.51724	8.07494	6.62251	8.48087	6.79045	8.65499	5.15673	4.18815	5.00226	4.72606	4.34438	4.22027	5.92525	5.74564	6.72232	6.00868	8.08175	7.21842	8.14779	8.70892	6.58928	8.87367	14.3017
27	4-Octylphenol	Test	ND	ND	ND	ND	ND	ND	ND	ND	ND	ND	ND	ND	ND	ND	ND	ND	ND	ND	ND	ND	ND	ND	-	ND	ND	ND	ND	ND	ND	ND	ND	ND	ND	ND	ND	ND	ND	ND	ND	ND	ND	ND	ND	ND	ND	ND	ND
28	(2E)-2-(2-Nitrobenzylidene)hydrazinecarboxamide	Test	10.68	5.49525	7.21202	6.55768	6.04902	5.95406	8.27757	8.43908	11.02	9.86999	12.7262	11.7164	13.9991	14.1095	11.3437	14.2027	28.5308	4.39455	6.62299	5.53096	7.04501	5.34163	-	9.01231	10.6507	10.2087	8.74417	10.9456	9.14591	11.055	6.62911	5.57406	7.24749	6.52795	6.00809	5.91859	8.23469	8.39972	11.0161	9.73952	12.7626	11.7159	13.9013	14.098	11.3499	14.2407	28.6639
29	Propoxur	Calibrant	13.9	6.47172	8.68394	8.12479	7.49628	7.46029	10.2328	10.793	14.7059	13.4535	16.5064	15.5592	19.8468	19.0863	15.907	19.2602	41.9087	5.99032	8.06288	6.71148	8.76377	6.27536	-	12.1454	13.9658	12.1586	10.6993	13.3393	11.4552	13.4015	8.10815	6.60027	8.81446	8.25929	7.60502	7.57329	10.4051	10.9823	14.8931	13.2985	16.7699	15.7492	19.5589	19.4733	16.2434	19.6604	42.5182
30	Ethirimol	Test	9.12	4.94896	6.31113	5.77692	5.32481	5.20924	7.28627	7.27804	9.09057	8.03191	10.6868	9.68936	11.089	11.7095	9.19297	11.7941	21.7103	3.56006	5.89462	4.95603	6.13373	4.91826	-	7.42438	9.10544	9.19204	7.73071	9.75556	8.00595	9.89339	5.91219	4.91019	6.17735	5.61783	5.16818	5.0577	7.07424	7.05478	8.85005	7.85047	10.425	9.44364	10.9658	11.3465	8.90221	11.4898	21.1508
31	Perfluorobutanoic acid	Test	9.31	5.01787	6.42666	5.87257	5.41368	5.30028	7.40833	7.41982	9.32735	8.25584	10.9392	9.93815	11.4397	12.0002	9.45171	12.0844	22.5295	3.66083	5.98428	5.02611	6.24257	4.9736	-	7.61819	9.29108	9.31783	7.85586	9.9011	8.1451	10.0352	5.99925	5.27638	6.77025	6.10618	5.61894	5.51886	7.69849	7.77535	10.0172	8.86394	11.6916	10.6681	12.535	12.8159	10.2048	12.9564	25.1492
32	Sulfacetamide	Calibrant	6.56	3.9625	4.63063	4.47774	4.1132	3.97873	5.61104	5.36615	5.94349	5.10815	7.27626	6.39505	6.62996	7.8679	5.81927	8.00165	11.5751	2.3038	4.66438	4.01141	4.73406	4.37133	-	4.86345	6.68354	7.45912	6.01418	7.78999	6.13393	7.98689	4.75242	4.06303	4.79899	4.57872	4.20817	4.0825	5.73433	5.5302	6.37474	5.7063	7.69552	6.85659	7.68934	8.27917	6.21543	8.44969	13.2514
33	Sulfaguanidine	Calibrant	1.75	1.901	1.27786	2.02976	1.79948	1.69365	2.36217	1.84535	1.06599	0.891048	1.73285	1.45988	0.86622	1.28811	0.6	1.79204	1.25634	1.0052	2.27336	2.24538	1.14764	1.90708	-	0.897572	2.61548	4.16258	2.79379	4.18123	2.72983	4.54664	2.69757	2.25719	1.9381	2.5778	2.35428	2.22873	3.11256	2.6293	1.95576	1.69761	2.73485	2.34346	1.72896	2.63209	1.37892	2.95259	2.34813
34	Metribuzin	Test	13.42	6.33965	8.49941	7.89587	7.28527	7.23936	9.95009	10.4473	14.1949	12.9518	15.9923	15.031	19.0163	18.3484	15.2215	18.5064	40.073	5.77573	7.85426	6.53626	8.54221	6.11768	-	11.6984	13.463	11.883	10.4222	12.99	11.1167	13.0585	7.88899	6.4781	8.63812	8.02099	7.3852	7.34422	10.1094	10.625	14.3891	12.8148	16.2652	15.2302	18.7798	18.7239	15.5516	18.9022	40.7428
35	Cycloate	Test	24.68	8.25803	10.7098	12.6005	11.6263	11.8392	15.5474	17.6342	21.8776	20.5938	23.32	22.6125	32.0205	33.6714	30.2336	34.1023	62.1137	8.2595	12.0446	10.5115	12.5008	10.2852	-	21.0009	25.3673	16.514	15.0789	19.941	17.9837	19.8374	12.5551	8.09546	10.7405	12.8491	11.8623	12.0725	15.8411	17.9812	22.1732	21.4523	23.4863	22.8752	33.3692	34.181	30.7169	34.5046	62.7195
36	Mequindox	Test	8.95	4.88675	6.2065	5.69122	5.24516	5.12772	7.17676	7.15112	8.87862	7.83188	10.4604	9.46671	10.7768	11.45	8.96231	11.5352	20.9822	3.4704	5.81419	4.89332	6.03711	4.8683	-	7.25109	8.93999	9.07908	7.61839	9.62524	7.88143	9.76648	5.83437	4.91019	6.17735	5.61783	5.16818	5.0577	7.07424	7.05478	8.85005	7.85047	10.425	9.44364	10.9658	11.3465	8.90221	11.4898	21.1508
37	Pantothenic Acid	Test	5.28	3.43439	3.7329	3.82424	3.49996	3.36422	4.75591	4.41501	4.46348	3.77545	5.63345	4.86363	4.69151	6.01913	4.22774	6.21307	7.50149	1.79448	4.0361	3.53963	3.99563	4.36928	-	3.66266	5.53439	6.57698	5.14621	6.81197	5.20723	7.04558	4.18614	3.4895	3.8727	3.92271	3.60126	3.47116	4.88062	4.57394	4.85408	4.36963	5.99702	5.28235	5.67718	6.38782	4.57989	6.59234	8.93772
38	4-nonylphenol	Test	ND	ND	ND	ND	ND	ND	ND	ND	ND	ND	ND	ND	ND	ND	ND	ND	ND	ND	ND	ND	ND	ND	-	ND	ND	ND	ND	ND	ND	ND	ND	ND	ND	ND	ND	ND	ND	ND	ND	ND	ND	ND	ND	ND	ND	ND	ND
39	Dichlorvos	Test	13.09	6.24607	8.36545	7.73743	7.13916	7.08663	9.75382	10.2085	13.8346	12.5989	15.6277	14.6574	18.4342	17.8396	14.7507	17.9874	38.7692	5.62232	7.70954	6.41561	8.38154	6.01154	-	11.3864	13.1188	11.6902	10.2285	12.7481	10.8826	12.8211	7.73791	6.40125	8.52529	7.87683	7.25223	7.20585	9.93009	10.4091	14.0788	12.5209	15.9518	14.9096	18.3081	18.2719	15.136	18.4452	39.6407
40	Monocrotophos	Test	7.9	4.4917	5.53598	5.1598	4.75042	4.62332	6.49458	6.36658	7.57334	6.60926	9.05585	8.09714	8.88938	9.85908	7.55706	9.95615	16.6251	2.93181	5.31323	4.50585	5.45639	4.57506	-	6.18712	7.93207	8.37381	6.91841	8.81898	7.11232	8.9828	5.35589	4.46293	5.44943	5.05631	4.64958	4.52968	6.35209	6.22943	7.50681	6.68872	8.95019	8.03712	9.1832	9.67853	7.43584	9.8327	16.7486
41	Mepanipyrim	Test	19.91	7.72637	10.1192	10.8002	9.95963	10.0644	13.462	14.8681	19.6071	18.3279	21.2293	20.4667	28.0791	27.8489	24.3086	28.2324	57.3426	7.69349	10.463	8.86903	10.9	8.21296	-	17.0857	20.3724	15.0493	13.6144	17.3662	15.401	17.3493	10.7356	7.64137	10.1018	11.0585	10.1928	10.2963	13.789	15.2232	19.8323	18.6423	21.3751	20.6611	28.4217	28.4264	24.8041	28.7342	57.5956
42	Mevinphos	Test	9.89	5.22423	6.7697	6.16366	5.68386	5.5777	7.77874	7.8521	10.0482	8.94044	11.7039	10.6956	12.5187	12.8907	10.2474	12.9763	25.0573	3.97088	6.25639	5.23996	6.5796	5.13629	-	8.20982	9.86228	9.69861	8.23513	10.3445	8.56946	10.4677	6.26554	5.2838	6.78222	6.1164	5.62837	5.52853	7.71151	7.79045	10.0415	8.88516	11.7178	10.6937	12.568	12.8468	10.2323	12.9873	25.234
43	Tripropyl phosphate	Test	15.49	6.87484	9.21049	8.86899	8.18167	8.18061	11.1452	11.9203	16.2772	15.0049	18.0643	17.1688	22.4365	21.5046	18.176	21.7357	47.3963	6.61971	8.73731	7.28941	9.40324	6.81353	-	13.5644	15.6465	13.0279	11.5749	14.4719	12.5563	14.5138	8.82732	6.94415	9.28644	9.00427	8.2925	8.29215	11.3223	12.103	16.3899	14.7897	18.2335	17.2754	21.9824	21.8324	18.4434	22.0508	47.6278
44	Triisopropyl phosphate	Test	16.69	7.14437	9.52806	9.41474	8.68395	8.71086	11.8075	12.7504	17.3314	16.0525	19.0877	18.2326	24.2018	23.2922	19.8763	23.5684	50.8652	7.0056	9.22842	7.7226	9.81902	7.24438	-	14.573	16.9262	13.6366	12.189	15.298	13.3635	15.3249	9.36084	7.17759	9.58095	9.59275	8.83599	8.86293	12.0389	12.9924	17.4803	15.9391	19.2627	18.3692	23.8743	23.7108	20.2212	23.9561	51.117
45	Bisphenol A	Test	ND	ND	ND	ND	ND	ND	ND	ND	ND	ND	ND	ND	ND	ND	ND	ND	ND	ND	ND	ND	ND	ND	-	ND	ND	ND	ND	ND	ND	ND	ND	ND	ND	ND	ND	ND	ND	ND	ND	ND	ND	ND	ND	ND	ND	ND	ND
46	Dimethoate	Test	10.57	5.45823	7.15223	6.503	5.99839	5.90178	8.20852	8.3575	10.8857	9.74105	12.5855	11.5753	13.7928	13.9395	11.1903	14.0313	28.047	4.33572	6.57224	5.49046	6.98014	5.31381	-	8.90098	10.5402	10.1383	8.67386	10.8622	9.06579	10.9734	6.57844	5.56714	7.23646	6.51784	5.99876	5.90899	8.22187	8.38474	10.9923	9.71855	12.7373	11.6909	13.8685	14.0672	11.3222	14.2097	28.5795
47	Propazine	Test	17.17	7.24397	9.63795	9.62885	8.88099	8.91933	12.0658	13.0768	17.7207	16.4405	19.4608	18.6213	24.8589	23.9956	20.551	24.2897	52.0846	7.13848	9.42032	7.89505	9.97818	7.41894	-	14.9626	17.4396	13.868	12.4225	15.6207	13.6797	15.6414	9.57148	7.27645	9.69833	9.86839	9.09075	9.13119	12.372	13.4102	17.9618	16.4667	19.7067	18.8464	24.7503	24.5943	21.0661	24.8524	52.5724
48	PF4OPeA	Test	10.33	5.37664	7.01973	6.38349	5.88767	5.78756	8.05741	8.17933	10.5913	9.45907	12.2765	11.2662	13.3426	13.5688	10.8563	13.6579	26.9908	4.20708	6.46116	5.40208	6.83852	5.25247	-	8.65756	10.3	9.98401	8.51981	10.6798	8.8908	10.7951	6.46794	5.6358	7.34569	6.61876	6.09186	6.00483	8.34978	8.53441	11.2294	9.92791	12.9896	11.9394	14.1966	14.3756	11.5989	14.5193	29.4225
49	Nalidixic acid	Test	13.47	6.35363	8.5192	7.9198	7.30733	7.26244	9.97969	10.4835	14.2489	13.0047	16.0468	15.0869	19.1037	18.4254	15.2929	18.585	40.2676	5.79857	7.87609	6.55453	8.56596	6.13395	-	11.7453	13.5153	11.912	10.4513	13.0265	11.1521	13.0944	7.91185	6.51057	8.68536	8.08319	7.44257	7.40397	10.1867	10.7182	14.5217	12.9413	16.3986	15.367	18.9833	18.9192	15.7316	19.0998	41.212
50	2-NP-AOZ	Test	11.94	5.90242	7.85314	7.17913	6.6238	6.54961	9.05845	9.36902	12.5272	11.3249	14.2913	13.2953	16.3484	16.0606	13.116	16.1772	34.0062	5.05566	7.19736	5.99417	7.77271	5.66834	-	10.2719	11.9303	10.9986	9.53451	11.895	10.0591	11.9845	7.20953	6.00924	7.93161	7.19795	6.62609	6.55629	9.08063	9.39543	12.569	11.1266	14.3995	13.3405	16.0862	16.1581	13.207	16.3119	34.2249
51	Carbamazepine	Calibrant	13.12	6.25467	8.37787	7.75187	7.15248	7.10054	9.77172	10.2302	13.8676	12.6312	15.6612	14.6917	18.4874	17.8859	14.7935	18.0346	38.8891	5.63645	7.72274	6.42659	8.39643	6.02109	-	11.4149	13.1501	11.7079	10.2462	12.7701	10.9039	12.8427	7.75166	6.34049	8.43516	7.76572	7.14974	7.0993	9.79161	10.2429	13.837	12.2938	15.7061	14.6593	17.9444	17.9242	14.817	18.0939	38.7782
52	Pirimicarb	Test	9.02	4.91243	6.24972	5.72652	5.27797	5.1613	7.22188	7.20339	8.9659	7.9142	10.5537	9.55839	10.9052	11.5568	9.05719	11.6417	21.2814	3.50725	5.84734	4.91914	6.07681	4.8889	-	7.32243	9.00804	9.12564	7.66468	9.67891	7.93271	9.81874	5.86641	4.89019	6.14485	5.59198	5.14431	5.03334	7.04109	7.0167	8.78812	7.79687	10.3574	9.37871	10.8832	11.2692	8.83395	11.4128	20.9427
53	Salbutamol	Test	5.41	3.48891	3.8249	3.89064	3.5624	3.42651	4.84318	4.5113	4.60922	3.90518	5.79646	5.01361	4.87685	6.20416	4.38603	6.39079	7.87622	1.84144	4.10024	3.5875	4.0754	4.37029	-	3.78094	5.64905	6.66673	5.23433	6.91093	5.30086	7.14057	4.24312	3.3944	3.72029	3.81644	3.50287	3.37245	4.74178	4.4195	4.61296	4.15483	5.72658	5.03433	5.35606	6.08495	4.31945	6.29629	8.3006
54	Methacrifos	Test	18.33	7.46573	9.86857	10.1357	9.3475	9.41385	12.6734	13.8507	18.5867	17.3057	20.2807	19.4768	26.3301	25.6633	22.1639	25.9985	54.6465	7.4123	9.87293	8.30968	10.3615	7.80927	-	15.8777	18.6821	14.3976	12.9571	16.3806	14.4267	16.3861	10.0729	7.3951	9.83355	10.2239	9.41953	9.47802	12.7989	13.9501	18.5553	17.1352	20.2449	19.4289	25.8678	25.7365	22.1672	26.0107	54.2803
55	Bentazone	Calibrant	14.79	6.70386	8.99432	8.54414	7.88259	7.8658	10.7483	11.4276	15.6092	14.3439	17.4065	16.4877	21.3293	20.4458	17.1782	20.651	45.0998	6.35877	8.44362	7.03548	9.13788	6.5733	-	12.9515	14.904	12.6537	11.1977	13.9782	12.0756	14.0289	8.51217	6.82536	9.12799	8.73279	8.04191	8.0297	10.9893	11.6939	15.8589	14.2504	17.7207	16.7369	21.102	20.97	17.6352	21.1765	45.8497
56	Bisphenol B	Test	ND	ND	ND	ND	ND	ND	ND	ND	ND	ND	ND	ND	ND	ND	ND	ND	ND	ND	ND	ND	ND	ND	-	ND	ND	ND	ND	ND	ND	ND	ND	ND	ND	ND	ND	ND	ND	ND	ND	ND	ND	ND	ND	ND	ND	ND	ND
57	Ethoprophos	Test	19.44	7.65367	10.0509	10.6058	9.78045	9.87379	13.2322	14.5702	19.3215	18.0416	20.9656	20.1917	27.588	27.2101	23.678	27.5804	56.6269	7.61926	10.2907	8.70333	10.7375	8.10606	-	16.7287	19.8703	14.8639	13.4276	17.0793	15.1167	17.0693	10.5411	7.57234	10.027	10.8109	9.96317	10.053	13.4972	14.8448	19.4697	18.2054	21.0572	20.3141	27.6759	27.6277	24.0142	27.9264	56.7057
58	Biotin	Test	8.35	4.66325	5.8282	5.38796	4.96301	4.83965	6.78812	6.70288	8.13128	7.12984	9.65843	8.6821	9.68834	10.5381	8.15504	10.6284	18.4587	3.15887	5.52879	4.67193	5.70208	4.69409	-	6.64131	8.36101	8.67756	7.2196	9.16472	7.44186	9.31852	5.56046	4.59871	5.67055	5.22333	4.80387	4.68648	6.56736	6.47456	7.90561	7.03367	9.38975	8.4542	9.71069	10.1722	7.86846	10.3222	18.0297
59	Fonofos	Test	24.22	8.22145	10.6504	12.4415	11.4783	11.6817	15.3665	17.3896	21.6938	20.4122	23.1467	22.4392	31.6995	33.1685	29.7068	33.603	61.7534	8.20481	11.9058	10.3566	12.3588	9.97637	-	20.5733	24.8974	16.4056	14.9721	19.7213	17.7606	19.6276	12.3934	7.95902	10.5008	12.3023	11.3503	11.5268	15.2267	17.1348	21.493	20.6715	22.8439	22.231	31.9607	32.433	28.8724	32.7646	61.2619
60	Paraoxon-methyl	Calibrant	12.87	6.18243	8.27291	7.63135	7.04131	6.98445	9.62214	10.0487	13.5905	12.3603	15.3798	14.4038	18.0416	17.4998	14.4371	17.6411	37.8828	5.51757	7.61249	6.33511	8.27073	5.9423	-	11.1763	12.8901	11.5602	10.0979	12.586	10.726	12.6621	7.63703	6.18009	8.19367	7.48334	6.8893	6.82894	9.4387	9.82098	13.2128	11.7146	15.0666	14.0112	17.0199	17.0436	14.0122	17.2048	36.5407
61	2-NP-AHD	Test	ND	ND	ND	ND	ND	ND	ND	ND	ND	ND	ND	ND	ND	ND	ND	ND	ND	ND	ND	ND	ND	ND	-	ND	ND	ND	ND	ND	ND	ND	ND	ND	ND	ND	ND	ND	ND	ND	ND	ND	ND	ND	ND	ND	ND	ND	ND
62	Sulfapyridine	Test	7.61	4.37944	5.34418	5.01249	4.61302	4.48383	6.30452	6.14987	7.21587	6.27743	8.66804	7.72285	8.38399	9.42402	7.17534	9.52689	15.4759	2.78924	5.17367	4.39883	5.29991	4.50883	-	5.89649	7.65814	8.17702	6.72352	8.59613	6.90013	8.76668	5.22452	4.48859	5.49122	5.08766	4.67854	4.5591	6.39253	6.27542	7.5816	6.75343	9.03272	8.11529	9.28204	9.77104	7.51683	9.92436	16.9871
63	PFPrS	Test	11.85	5.87439	7.81008	7.13506	6.58308	6.5073	9.00331	9.30291	12.4218	11.2227	14.1827	13.1852	16.1821	15.9211	12.9886	16.0357	33.6217	5.00955	7.15678	5.96113	7.72231	5.64362	-	10.1831	11.8381	10.9432	9.47903	11.8277	9.99419	11.9184	7.1681	6.33781	8.43117	7.76088	7.14528	7.09466	9.78557	10.2356	13.8264	12.2839	15.6953	14.6483	17.9285	17.9091	14.8032	18.0786	38.7403
64	(-)-Citrinin	Test	ND	ND	ND	ND	ND	ND	ND	ND	ND	ND	ND	ND	ND	ND	ND	ND	ND	ND	ND	ND	ND	ND	-	ND	ND	ND	ND	ND	ND	ND	ND	ND	ND	ND	ND	ND	ND	ND	ND	ND	ND	ND	ND	ND	ND	ND	ND
65	Bisphenol S	Test	11.26	5.68658	7.51727	6.8449	6.31483	6.22902	8.63937	8.86826	11.7218	10.5455	13.4581	12.4524	15.0852	15.0071	12.1564	15.1095	31.0717	4.70247	6.88902	5.74435	7.3848	5.48819	-	9.59613	11.2365	10.5762	9.11153	11.3843	9.56741	11.4842	6.89632	5.75623	7.53627	6.79965	6.25873	6.17679	8.57862	8.80295	11.6519	10.3029	13.4372	12.3819	14.7857	14.9301	12.0974	15.0763	30.9314
66	Sulfadiazine	Calibrant	7.06	4.16303	4.97379	4.73261	4.35163	4.21923	5.94227	5.7391	6.54436	5.65791	7.93577	7.02111	7.44918	8.60495	6.45973	8.72201	13.3776	2.5284	4.90765	4.19587	5.00466	4.41511	-	5.35109	7.1442	7.8019	6.35255	8.17363	6.49829	8.35758	4.97649	4.25004	5.1029	4.7996	4.41236	4.2891	6.02044	5.85327	6.89644	6.15986	8.2749	7.3999	8.37746	8.92409	6.77678	9.08621	14.8359
67	Hexazinone	Test	11.99	5.91792	7.87688	7.20359	6.6464	6.5731	9.08904	9.40572	12.5855	11.3816	14.3514	13.3563	16.4406	16.138	13.1868	16.2558	34.2192	5.08119	7.21988	6.01253	7.80056	5.68221	-	10.3212	11.9816	11.0293	9.56525	11.9324	10.0951	12.0211	7.23255	6.00316	7.9222	7.18805	6.61697	6.54685	9.06819	9.38069	12.5464	11.1062	14.376	13.3169	16.0538	16.1275	13.1793	16.2811	34.1439
68	Sulfamethoxazole	Test	10.94	5.58183	7.35095	6.68666	6.16843	6.07747	8.44024	8.63169	11.3361	10.1738	13.0565	12.048	14.4866	14.5117	11.7073	14.6086	29.6726	4.53314	6.74258	5.62665	7.19794	5.40711	-	9.27474	10.9126	10.3742	8.90956	11.1426	9.33507	11.2476	6.74888	5.68312	7.42073	6.68923	6.15686	6.07179	8.43898	8.63898	11.3943	10.074	13.1647	12.1122	14.4259	14.5914	11.7927	14.7359	30.0108
69	Fenothiocarb	Test	21.28	7.91602	10.2978	11.3503	10.4672	10.6048	14.1076	15.7122	20.363	19.0855	21.9221	21.1869	29.3845	29.6503	26.1054	30.0648	59.0854	7.87659	10.9488	9.34837	11.3792	8.54218	-	18.1323	21.8291	15.5476	14.1159	18.1704	16.2011	18.1319	11.2884	7.78216	10.2615	11.5935	10.6898	10.8239	14.4136	16.0434	20.5753	19.5521	22.0247	21.366	29.9914	30.1525	26.5333	30.4758	59.3007
70	Sulfathiazole	Test	7.53	4.34825	5.29082	4.97182	4.57506	4.44535	6.25197	6.0901	7.11763	6.18647	8.56121	7.62007	8.24602	9.30438	7.07056	9.40905	15.1638	2.75048	5.13508	4.3693	5.25691	4.49243	-	5.81666	7.58293	8.1226	6.66966	8.53466	6.84163	8.7071	5.18835	4.42427	5.38648	5.00924	4.60609	4.48553	6.29135	6.16041	7.39464	6.59163	8.82631	7.9199	9.03501	9.53982	7.31447	9.6953	16.3926
71	Formothion	Test	14.49	6.62746	8.89423	8.40355	7.75311	7.72974	10.5758	11.2146	15.3113	14.0498	17.111	16.1823	20.8385	19.989	16.7499	20.1834	44.0568	6.23904	8.31618	6.92641	9.01682	6.47218	-	12.6831	14.587	12.4892	11.032	13.7642	11.8676	13.8187	8.37636	6.61914	8.84135	8.29718	7.63998	7.60976	10.452	11.0391	14.9721	13.3751	16.8486	15.8304	19.6827	19.5927	16.354	19.7813	42.7948
72	Thiobencarb	Test	24.07	8.20892	10.6315	12.3889	11.4294	11.6297	15.3066	17.3088	21.6327	20.3518	23.0895	22.3817	31.593	33.0015	29.5327	33.4368	61.6348	8.18749	11.8598	10.3059	12.3119	9.87706	-	20.4373	24.7434	16.3688	14.9357	19.6483	17.6866	19.5577	12.34	8.03272	10.6229	12.5993	11.6282	11.8229	15.562	17.5941	21.8638	21.1058	23.1889	22.5814	32.7397	33.3844	29.87	33.7135	62.0486
73	Alternariol	Test	13.98	6.49326	8.71351	8.16276	7.53127	7.49697	10.2796	10.8504	14.7894	13.5357	16.5902	15.6454	19.9832	19.209	16.0213	19.3856	42.2072	6.02504	8.09743	6.74066	8.79931	6.30189	-	12.219	14.0498	12.2039	10.7449	13.3972	11.5113	13.4584	8.14459	6.5668	8.76654	8.19282	7.5437	7.50935	10.3227	10.8825	14.7536	13.1639	16.6309	15.6059	19.3417	19.264	16.0499	19.4486	42.0291
74	Metobromuron	Test	16.08	7.01106	9.37463	9.13913	8.43032	8.44287	11.4738	12.3309	16.81	15.5337	18.5838	17.7083	23.3261	22.3883	19.014	22.6416	49.1769	6.81915	8.98077	7.50274	9.61219	7.02264	-	14.0667	16.2748	13.3325	11.8821	14.8814	12.956	14.9159	9.09079	7.08792	9.47063	9.35711	8.6183	8.63406	11.7528	12.6358	17.0538	15.4824	18.8641	17.9435	23.1199	22.9572	19.5051	23.1917	49.7816
75	Bromacil	Test	12.48	6.06717	8.1025	7.44244	6.86696	6.80265	9.38713	9.76447	13.1505	11.931	14.931	13.9458	17.3376	16.8968	13.8821	17.027	36.2807	5.32738	7.43936	6.19225	8.06738	5.82339	-	10.8002	12.4862	11.3271	9.86389	12.2974	10.4472	12.379	7.45794	6.17438	8.18498	7.47355	6.88027	6.81958	9.42644	9.80637	13.1909	11.6944	15.0441	13.9885	16.9879	17.0132	13.9844	17.174	36.462
76	Oxolinic acid	Test	11.6	5.79566	7.68822	7.01237	6.46969	6.38957	8.84961	9.119	12.1271	10.9372	13.8783	12.8769	15.7187	15.5338	12.6354	15.6428	32.5469	4.88038	7.04368	5.86931	7.58067	5.57648	-	9.93537	11.5825	10.7885	9.32411	11.6402	9.81362	11.7348	7.05296	5.85985	7.6991	6.9596	6.40625	6.32905	8.78053	9.04067	12.0225	10.634	13.8277	12.7696	15.3074	15.4221	12.541	15.571	32.2603
77	Flumequine	Test	13.86	6.46089	8.66902	8.10578	7.47877	7.44194	10.2094	10.7643	14.6639	13.4122	16.4643	15.5159	19.7784	19.025	15.8499	19.1974	41.7586	5.97284	8.04558	6.69689	8.74586	6.26211	-	12.1084	13.9238	12.1358	10.6764	13.3103	11.4271	13.373	8.08991	6.58599	8.79406	8.23083	7.57876	7.54591	10.3698	10.9396	14.8335	13.2409	16.7105	15.688	19.4659	19.3836	16.1605	19.5697	42.3094
78	Cinoxacin	Test	10.86	5.55533	7.30856	6.64702	6.13173	6.03953	8.39027	8.57246	11.2391	10.0805	12.9552	11.9462	14.3366	14.3879	11.5953	14.4836	29.3216	4.49058	6.70584	5.59721	7.15097	5.38697	-	9.1941	10.8319	10.3234	8.85879	11.082	9.2769	11.1884	6.71202	5.61875	7.3186	6.59356	6.06861	5.98089	8.31785	8.49702	11.1702	9.87564	12.9267	11.8774	14.1146	14.2985	11.5297	14.4419	29.212
79	Carbadox	Test	8.31	4.64814	5.80251	5.3677	4.94414	4.82043	6.7621	6.67299	8.08156	7.08333	9.60487	8.62995	9.61666	10.4776	8.10162	10.5683	18.2934	3.13843	5.50968	4.65716	5.68006	4.68292	-	6.60081	8.32269	8.65065	7.19289	9.13399	7.41255	9.28867	5.54224	4.56501	5.61568	5.18162	4.76534	4.64731	6.51364	6.41332	7.80593	6.94748	9.28001	8.3499	9.57874	10.0487	7.76015	10.1997	17.7073
80	Perfluoropentanoic acid	Test	11.67	5.81783	7.72267	7.04676	6.50148	6.42256	8.89272	9.17053	12.2099	11.0174	13.964	12.9635	15.8487	15.6422	12.7342	15.7528	32.8488	4.9167	7.0754	5.89503	7.62056	5.59506	-	10.0049	11.654	10.832	9.36761	11.6927	9.86422	11.7862	7.08521	6.1136	8.09222	7.37052	6.78525	6.72109	9.29731	9.65265	12.9597	11.4824	14.8053	13.7478	16.6507	16.693	13.6929	16.8511	35.6309
81	Sulfamerazine	Calibrant	8.16	4.59122	5.70565	5.29169	4.87334	4.74833	6.66439	6.56089	7.89531	6.90929	9.40398	8.4346	9.34897	10.2508	7.90174	10.3437	17.6775	3.06221	5.43793	4.60181	5.59783	4.64191	-	6.44913	8.17933	8.54956	7.09263	9.01876	7.30269	9.17673	5.47399	4.64893	5.75234	5.28583	4.8616	4.74521	6.64781	6.56636	8.05507	7.16289	9.55414	8.61064	9.9087	10.3574	8.03112	10.5061	18.5157
82	Aclonifen	Test	22.22	8.02799	10.4101	11.7129	10.8024	10.9618	14.5292	16.2693	20.8248	19.5475	22.3441	21.6226	30.1857	30.8296	27.2978	31.2581	60.051	7.98399	11.2677	9.67391	11.7044	8.865	-	18.8714	22.8205	15.8533	14.4224	18.6931	16.724	18.6384	11.6545	7.82723	10.317	11.7717	10.8556	11.0002	14.6196	16.3171	20.8119	19.8435	22.2329	21.5892	30.4994	30.7267	27.116	31.0536	59.8164
83	Dienestrol	Test	ND	ND	ND	ND	ND	ND	ND	ND	ND	ND	ND	ND	ND	ND	ND	ND	ND	ND	ND	ND	ND	ND	-	ND	ND	ND	ND	ND	ND	ND	ND	ND	ND	ND	ND	ND	ND	ND	ND	ND	ND	ND	ND	ND	ND	ND	ND
84	Tributyl phosphate	Test	22.96	8.10638	10.4971	11.9894	11.0585	11.2347	14.8486	16.6943	21.1618	19.8839	22.6531	21.9393	30.772	31.723	28.2105	32.1576	60.7209	8.06454	11.5103	9.92814	11.9535	9.21118	-	19.476	23.5947	16.0731	14.642	19.0871	17.1199	19.0187	11.9344	7.91507	10.4352	12.1245	11.1844	11.3501	15.0244	16.8605	21.2681	20.4012	22.6396	22.019	31.4804	31.8622	28.2804	32.1934	60.7879
85	Triisobutyl phosphate	Test	23.2	8.13005	10.5256	12.0773	11.1401	11.3216	14.9498	16.8296	21.2669	19.9885	22.7499	22.038	30.955	32.0058	28.5013	32.4414	60.9258	8.09062	11.5873	10.0102	12.0326	9.34174	-	19.6777	23.8444	16.1405	14.7091	19.2115	17.2453	19.1385	12.0236	7.94535	10.4798	12.2469	11.2987	11.4718	15.1638	17.0494	21.4233	20.5882	22.7802	22.1653	31.8123	32.2555	28.6877	32.587	61.1149
86	Sulfisoxazole	Test	11.32	5.706	7.54787	6.8745	6.34221	6.25738	8.67657	8.91256	11.7937	10.6149	13.5327	12.5277	15.1973	15.1	12.2408	15.2035	31.333	4.73403	6.91639	5.76641	7.4196	5.50356	-	9.65618	11.2974	10.6138	9.1492	11.4295	9.61091	11.5285	6.92397	5.80521	7.61337	6.87473	6.32797	6.24824	8.67345	8.9145	11.8262	10.4584	13.6212	12.5643	15.0305	15.1608	12.3053	15.3082	31.556
87	Diethylstilbestrol	Test	ND	ND	ND	ND	ND	ND	ND	ND	ND	ND	ND	ND	ND	ND	ND	ND	ND	ND	ND	ND	ND	ND	-	ND	ND	ND	ND	ND	ND	ND	ND	ND	ND	ND	ND	ND	ND	ND	ND	ND	ND	ND	ND	ND	ND	ND	ND
88	Mephosfolan	Test	12.41	6.04615	8.07105	7.40842	6.83556	6.76993	9.34473	9.71333	13.0706	11.8532	14.8493	13.8625	17.2102	16.7884	13.7826	16.9168	35.9893	5.29268	7.40813	6.16659	8.03	5.80264	-	10.7322	12.4139	11.2849	9.82154	12.2454	10.397	12.328	7.42576	6.13982	8.1323	7.41472	6.82602	6.76333	9.35273	9.71859	13.0591	11.5734	14.9081	13.8513	16.7953	16.8303	13.8178	16.9896	35.9883
89	Acetochlor	Test	21.26	7.91349	10.2954	11.3425	10.46	10.597	14.0984	15.7002	20.3527	19.0752	21.9127	21.1772	29.3667	29.6247	26.0797	30.0388	59.0632	7.87419	10.9419	9.34141	11.3722	8.5365	-	18.1169	21.808	15.5408	14.109	18.159	16.1898	18.1209	11.2805	7.7512	10.225	11.4728	10.5776	10.7047	14.2735	15.8581	20.4122	19.3513	21.8818	21.2118	29.6429	29.7633	26.1406	30.0837	58.9384
90	Sulfamethizol	Calibrant	9.16	4.96352	6.33558	5.79707	5.34354	5.22841	7.31199	7.30789	9.14043	8.07902	10.74	9.74175	11.1627	11.7707	9.24736	11.8551	21.8823	3.58123	5.91352	4.97078	6.15657	4.92997	-	7.46517	9.14446	9.21856	7.75709	9.78621	8.03525	9.92324	5.93051	5.01695	6.35066	5.75719	5.29684	5.18912	7.25275	7.26015	9.18373	8.13952	10.7886	9.79361	11.412	11.7641	9.27135	11.906	22.2796
91	Hexestrol	Test	ND	ND	ND	ND	ND	ND	ND	ND	ND	ND	ND	ND	ND	ND	ND	ND	ND	ND	ND	ND	ND	ND	-	ND	ND	ND	ND	ND	ND	ND	ND	ND	ND	ND	ND	ND	ND	ND	ND	ND	ND	ND	ND	ND	ND	ND	ND
92	Paraoxon	Test	15.84	6.95651	9.30979	9.02966	8.32956	8.33654	11.3408	12.1644	16.5966	15.3218	18.3763	17.4927	22.9692	22.0299	18.6735	22.2741	48.47	6.7403	8.8822	7.41604	9.52851	6.93679	-	13.8639	16.019	13.2098	11.7584	14.7156	12.7941	14.7531	8.98387	7.01417	9.37724	9.17252	8.44784	8.45507	11.5279	12.3569	16.7102	15.1213	18.5392	17.5985	22.5259	22.3682	18.9481	22.5942	48.6775
93	Nifuroxazide	Test	11.32	5.706	7.54787	6.8745	6.34221	6.25738	8.67657	8.91256	11.7937	10.6149	13.5327	12.5277	15.1973	15.1	12.2408	15.2035	31.333	4.73403	6.91639	5.76641	7.4196	5.50356	-	9.65618	11.2974	10.6138	9.1492	11.4295	9.61091	11.5285	6.92397	5.76608	7.5518	6.81468	6.27259	6.19109	8.59761	8.82527	11.6868	10.334	13.4742	12.4185	14.8347	14.9763	12.139	15.1227	31.0565
94	Sudan II	Test	31.74	8.53316	12.0593	14.6054	13.5242	13.84	17.7497	20.707	24.4253	23.0088	25.9761	25.0664	36.4051	39.5444	36.7808	39.6676	68.139	9.51804	13.7839	12.7764	14.7037	10.9332	-	30.4557	32.029	17.3665	15.8543	22.4682	20.6221	22.166	14.5908	8.62907	12.4349	14.8114	13.7318	14.0634	17.8986	21.0574	24.8021	23.2602	26.4791	25.4166	37.0019	40.1812	37.6817	40.2521	69.0215
95	Phorate sulfoxide	Test	14.6	6.65569	8.93146	8.4552	7.80068	7.77971	10.6392	11.2928	15.4214	14.1583	17.2203	16.2952	21.0196	20.1567	16.907	20.355	44.4432	6.28348	8.36301	6.96642	9.06178	6.50916	-	12.7819	14.7031	12.5498	11.0931	13.8428	11.944	13.896	8.4262	6.73959	9.01044	8.54656	7.87006	7.84999	10.76	11.4138	15.4849	13.8776	17.3552	16.3556	20.4961	20.3801	17.085	20.5788	44.5727
96	Clenbuterol	Calibrant	9.24	4.99256	6.38427	5.83735	5.38096	5.26675	7.3634	7.36759	9.24013	8.1733	10.8463	9.84651	11.3103	11.893	9.35627	11.9773	22.227	3.62364	5.95128	5.00029	6.20237	4.9533	-	7.54678	9.2226	9.27154	7.8098	9.84749	8.09384	9.98296	5.96717	4.93409	6.21618	5.64884	5.19681	5.08693	7.11398	7.10045	8.92431	7.91476	10.506	9.52151	11.065	11.4393	8.98416	11.5822	21.4009
97	Fenthion	Test	ND	ND	ND	ND	ND	ND	ND	ND	ND	ND	ND	ND	ND	ND	ND	ND	ND	ND	ND	ND	ND	ND	-	ND	ND	ND	ND	ND	ND	ND	ND	7.91682	10.4377	12.1315	11.191	11.3571	15.0324	16.8714	21.2771	20.412	22.6477	22.0275	31.4996	31.8849	28.3038	32.2161	60.8068
98	Sulfisomidin	Test	6.59	3.97463	4.65137	4.49304	4.12752	3.99316	5.63097	5.38851	5.97923	5.14073	7.31562	6.43224	6.67822	7.91191	5.85741	8.04455	11.6802	2.31691	4.67902	4.02247	4.75045	4.37287	-	4.89246	6.711	7.47973	6.03451	7.81299	6.15576	8.00909	4.76583	3.92706	4.57848	4.42051	4.06187	3.93475	5.52898	5.29913	6.00363	5.38242	7.28225	6.47099	7.19959	7.81969	5.81663	7.99716	12.1548
99	Metalaxyl	Test	15.23	6.81252	9.13298	8.74886	8.07109	8.06413	10.9987	11.738	16.0336	14.7636	17.8252	16.921	22.0317	21.1126	17.8058	21.3339	46.5662	6.52585	8.62883	7.19519	9.30722	6.72343	-	13.3389	15.3703	12.8905	11.4364	14.2895	12.3786	14.3347	8.71056	6.8768	9.19725	8.8483	8.14852	8.1413	11.1312	11.8679	16.0869	14.4805	17.9418	16.9686	21.4771	21.3365	17.9781	21.5481	46.6186
100	PF5OHxA	Test	12.25	5.99772	7.99819	7.33053	6.76364	6.69506	9.24759	9.5963	12.8869	11.6744	14.6611	13.671	16.9181	16.5407	13.5554	16.6649	35.3192	5.21275	7.3366	6.10792	7.9436	5.75593	-	10.5762	12.2489	11.1879	9.72433	12.1264	10.2822	12.2113	7.35219	6.31628	8.39903	7.7221	7.10952	7.05751	9.7372	10.1777	13.7415	12.2045	15.6087	14.5603	17.8016	17.788	14.6922	17.9562	38.4367
101	Sulfamethoxydiazine	Test	9.2	4.97805	6.35996	5.81721	5.36225	5.24758	7.33771	7.33774	9.19028	8.12615	10.7932	9.79413	11.2365	11.8319	9.30179	11.9162	22.0545	3.60242	5.9324	4.98554	6.17945	4.94165	-	7.50597	9.18351	9.24506	7.78345	9.81685	8.06455	9.9531	5.94884	5.04039	6.38867	5.7881	5.32537	5.21829	7.2923	7.30572	9.2577	8.20365	10.8691	9.8712	11.5112	11.8569	9.3535	11.9985	22.5315
102	Sulfamonomethoxine	Calibrant	9.2	4.97805	6.35996	5.81721	5.36225	5.24758	7.33771	7.33774	9.19028	8.12615	10.7932	9.79413	11.2365	11.8319	9.30179	11.9162	22.0545	3.60242	5.9324	4.98554	6.17945	4.94165	-	7.50597	9.18351	9.24506	7.78345	9.81685	8.06455	9.9531	5.94884	5.10238	6.48912	5.87042	5.40135	5.296	7.39757	7.42716	9.45458	8.37448	11.0829	10.0778	11.7755	12.1044	9.57278	12.2455	23.2047
103	Sulfamethoxypyridazine	Test	9.95	5.24523	6.80433	6.19369	5.71172	5.60635	7.81686	7.89676	10.1225	9.01124	11.7824	10.7737	12.6308	12.983	10.3302	13.069	25.3205	4.00308	6.2844	5.26207	6.61479	5.15249	-	8.27096	9.92175	9.73772	8.27412	10.3903	8.61331	10.5124	6.29312	5.3244	6.8476	6.17256	5.68019	5.58168	7.78306	7.87348	10.1751	9.00176	11.8618	10.8339	12.7495	13.0168	10.3837	13.1574	25.7001
104	Propetamphos	Test	21.42	7.93361	10.3149	11.4051	10.5179	10.6587	14.1715	15.7964	20.4344	19.157	21.9874	21.2545	29.5082	29.829	26.2852	30.246	59.2393	7.89323	10.997	9.39704	11.428	8.58316	-	18.2409	21.9773	15.595	14.1635	18.2498	16.2804	18.209	11.3436	7.77064	10.2478	11.5484	10.6479	10.7794	14.3613	15.9741	20.5146	19.4775	21.9716	21.3087	29.8616	30.0071	26.3865	30.3294	59.1667
105	Brevianamide F	Test	10.07	5.28702	6.87308	6.2537	5.76736	5.66362	7.89299	7.98605	10.2708	9.15279	11.939	10.9296	12.8554	13.1678	10.496	13.2547	25.8474	4.06751	6.34034	5.30629	6.68531	5.18452	-	8.39317	10.0409	9.81575	8.35193	10.4818	8.70099	10.6017	6.34831	5.3244	6.8476	6.17256	5.68019	5.58168	7.78306	7.87348	10.1751	9.00176	11.8618	10.8339	12.7495	13.0168	10.3837	13.1574	25.7001
106	Fosthiazate	Test	14.87	6.72392	9.02024	8.5815	7.91699	7.90197	10.794	11.4842	15.6875	14.4212	17.4839	16.5677	21.4586	20.5673	17.2924	20.7754	45.3721	6.38991	8.47744	7.06455	9.16937	6.60041	-	13.0225	14.9887	12.6972	11.2415	14.035	12.1309	14.0848	8.54831	6.79157	9.08198	8.6585	7.97336	7.95799	10.8979	11.5821	15.7106	14.102	17.5762	16.586	20.8605	20.7345	17.4153	20.9379	45.3457
107	Metolachlor	Test	21.01	7.88119	10.2645	11.2439	10.369	10.5001	13.9832	15.5488	20.2224	18.9446	21.7936	21.0537	29.141	29.3028	25.7566	29.7121	58.7774	7.84362	10.855	9.25435	11.2847	8.46868	-	17.9242	21.543	15.4544	14.0222	18.0158	16.0469	17.9818	11.1812	7.73145	10.2022	11.3967	10.5068	10.6295	14.1848	15.7412	20.3079	19.2232	21.7907	21.1131	29.4211	29.5176	25.8935	29.8359	58.7037
108	Penconazole	Test	20.4	7.79794	10.1861	10.9998	10.1437	10.2603	13.697	15.1743	19.89	18.6114	21.4893	20.7374	28.5667	28.5039	24.9587	28.8998	58.0203	7.76396	10.6396	9.04111	11.071	8.32198	-	17.458	20.8947	15.2347	13.8012	17.6595	15.6922	17.6351	10.9358	7.69504	10.161	11.258	10.378	10.4928	14.023	15.5288	20.1156	18.9874	21.6227	20.9307	29.0144	29.0704	25.4455	29.3846	58.2632
109	Sulfachloropyridazine	Test	10.37	5.39031	7.04201	6.40343	5.90614	5.80661	8.08264	8.20904	10.6405	9.50612	12.3281	11.3179	13.4176	13.6306	10.9119	13.7201	27.1669	4.22854	6.47971	5.41681	6.86212	5.26277	-	8.69817	10.3399	10.0098	8.54554	10.7102	8.91998	10.8248	6.48636	5.49723	7.12487	6.41663	5.90539	5.81296	8.09344	8.23475	10.7537	9.5085	12.4825	11.4407	13.5399	13.7585	11.0458	13.9002	27.734
110	Tris(2-chloroethyl) phosphate	Test	14.27	6.57024	8.81792	8.29995	7.65768	7.62955	10.4485	11.0578	15.0886	13.8301	16.8891	15.9535	20.4727	19.6531	16.4357	19.8396	43.2704	6.14831	8.22214	6.84633	8.92487	6.39849	-	12.4841	14.3549	12.367	10.909	13.6063	11.7143	13.6637	8.27651	6.67238	8.91663	8.40576	7.74015	7.7143	10.5862	11.2022	15.197	13.5943	17.0715	16.0611	20.0371	19.9352	16.6715	20.1281	43.5781
111	Dibutyl phenyl phosphate	Calibrant	23.18	8.12811	10.5232	12.07	11.1333	11.3143	14.9414	16.8184	21.2582	19.9799	22.7419	22.0298	30.9398	31.9823	28.4771	32.4179	60.9089	8.08844	11.5809	10.0034	12.0261	9.33053	-	19.6608	23.8236	16.135	14.7036	19.2012	17.2349	19.1286	12.0162	7.93502	10.4644	12.2052	11.2597	11.4302	15.1163	16.9849	21.3705	20.5248	22.7322	22.1155	31.6996	32.1214	28.5486	32.4529	61.0037
112	4-Androsten-3,17-dione	Test	17.72	7.35242	9.75308	9.87108	9.10392	9.15549	12.3568	13.4464	18.1443	16.8634	19.8636	19.0414	25.5769	24.7924	21.3192	25.1064	53.3657	7.27633	9.63692	8.09203	10.1594	7.61221	-	15.4007	18.0286	14.1244	12.6813	15.9846	14.037	15.9982	9.81062	7.3003	9.726	9.9376	9.15474	9.19864	12.4553	13.5152	18.0798	16.5979	19.8144	18.9627	24.969	24.8165	21.2795	25.0777	52.9197
113	Iprobenfos	Test	20.57	7.82179	10.2084	11.0684	10.2069	10.3276	13.7775	15.2794	19.9847	18.7064	21.5761	20.8278	28.7303	28.7284	25.1824	29.1283	58.2404	7.78698	10.7001	9.10065	11.1305	8.36092	-	17.5875	21.0756	15.2972	13.864	17.7598	15.7919	17.7327	11.0047	7.67848	10.1426	11.1958	10.3203	10.4315	13.9502	15.4335	20.0281	18.8805	21.5463	20.8476	28.8305	28.8696	25.2451	29.182	58.0595
114	Estriol	Test	ND	ND	ND	ND	ND	ND	ND	ND	ND	ND	ND	ND	ND	ND	ND	ND	ND	ND	ND	ND	ND	ND	-	ND	ND	ND	ND	ND	ND	ND	ND	ND	ND	ND	ND	ND	ND	ND	ND	ND	ND	ND	ND	ND	ND	ND	ND
115	Terbufos	Test	27.56	8.42884	11.1534	13.5193	12.4869	12.7525	16.5769	19.0465	22.9568	21.6437	24.3823	23.6429	33.902	36.498	33.2711	36.8607	64.431	8.67994	12.8438	11.4625	13.3539	11.4257	-	24.1272	28.2239	17.039	15.5848	21.1665	19.2421	20.9923	13.4907	8.27099	11.1471	13.5206	12.4947	12.7472	16.5764	19.0261	23.0133	22.2833	24.3504	23.6829	34.9209	36.3001	33.033	36.588	64.6635
116	Trimethoprim	Calibrant	7.9	4.4917	5.53598	5.1598	4.75042	4.62332	6.49458	6.36658	7.57334	6.60926	9.05585	8.09714	8.88938	9.85908	7.55706	9.95615	16.6251	2.93181	5.31323	4.50585	5.45639	4.57506	-	6.18712	7.93207	8.37381	6.91841	8.81898	7.11232	8.9828	5.35589	4.36808	5.29498	4.94119	4.54321	4.42173	6.20348	6.06065	7.23264	6.45135	8.64722	7.7507	8.8211	9.33956	7.13941	9.49706	15.882
117	Phorate sulfone	Test	17.81	7.36959	9.77089	9.91039	9.1401	9.19385	12.4039	13.5064	18.2114	16.9304	19.927	19.1076	25.6909	24.9217	21.4443	25.2389	53.5638	7.29748	9.67202	8.1242	10.1891	7.64263	-	15.4717	18.125	14.1654	12.7227	16.0436	14.095	16.056	9.84951	7.34799	9.78056	10.0793	9.28581	9.33687	12.6257	13.7304	18.3177	16.865	20.0306	19.1964	25.4152	25.2717	21.7179	25.5394	53.6085
[truncated: 226 more rows]
[truncated: 14 more columns]

## Sheet: Table S6
Input CM: CM 28; reference-input CM: CM 27; R2 =0.995 (calibrants, between input and reference-input CMs).
[truncated: 377 more rows]
[truncated: 14 more columns]

[truncated: 4 more sheets: Table S7, Table S8, Table S9, Table S10]
